# Supplementary material
Source: publisher figshare collection journal article supplement (https://gsapubs.figshare.com/ndownloader/files/31651130)
Supplement: Supplementary file 1 [file 31651130]

## Sheet: I - new data from this study
Supplementary Table 1 - part I - New zircon trace element data from the Barberton Paleoarchean TTG and associated volcanic rocks, and results of validation reference materials
Zircon spot	Sample	Domain	207Pb/206Pb date (Ma) *	2 SE	c206Pb (%) *	U-Pb conc. (%) *	Li (ppm)	Al (ppm)	P (ppm)	Ca (ppm)	Ti (ppm)	Y (ppm)	Nb (ppm)	La (ppm)	Ce (ppm)	Pr (ppm)	Nd (ppm)	Sm (ppm)	Eu (ppm)	Gd (ppm)	Tb (ppm)	Dy (ppm)	Ho (ppm)	Er (ppm)	Tm (ppm)	Yb (ppm)	Lu (ppm)	Hf (ppm)	Ta (ppm)	Th (ppm)	U (ppm)		Li 2 SE (ppm)	Al 2 SE (ppm)	P 2 SE (ppm)	Ca 2 SE (ppm)	Ti 2 SE (ppm)	Y 2 SE (ppm)	Nb 2 SE (ppm)	La 2 SE (ppm)	Ce 2 SE (ppm)	Pr 2 SE (ppm)	Nd 2 SE (ppm)	Sm 2 SE (ppm)	Eu 2 SE (ppm)	Gd 2 SE (ppm)	Tb 2 SE (ppm)	Dy 2 SE (ppm)	Ho 2 SE (ppm)
C2a-01	JB17-C2a	Core	3484	37	0.925981	97.9	79.4	32.9	890	1410	8.02921	443.946	0.80425	6.6	23.4	2.38	12.8	5	1.89	13.9	3.72	40.6	14.67	66.7	15.05	151.9	28.78	10130	0.313	34.4	91.1		2.3	8.6	170	390	3.2	13	0.26	2.1	5.1	0.89	5.5	2	0.91	2.9	0.31	2.1	0.51
C2a-02	JB17-C2a	Rim	3452	35	0.234605	102.6	97.5	<LOD	127.3	<LOD	2.77767	516.346	1.00425	<LOD	10.64	0.07	0.8	2.17	0.521	10.14	3.4	40.6	16.14	75	17.62	174.3	36.47	9780	0.543	54.9	145.4		2.8	2.6	4.7	98	0.63	8.5	0.16	0.029	0.38	0.021	0.17	0.27	0.071	0.54	0.16	1	0.48
C2a-03	JB17-C2a	Rim	3479	29	<LOD	99.2	99.9	16.4	86.6	<LOD	11.74	459.246	1.49425	3.56	18.3	1.93	12.85	6.64	3.03	16.03	4.02	41.8	15.01	67	14.54	145.4	28.63	10900	0.506	50	129.9		2.1	3	7.2	110	0.81	7.7	0.13	0.24	0.73	0.14	0.98	0.5	0.31	0.75	0.15	1.1	0.37
C2a-04	JB17-C2a	Core	3451	28	0.0506125	100	110.9	30.4	182.6	<LOD	20.29	883.946	2.81425	5.13	34.1	4.34	33.1	16.2	6.55	31.9	7.6	79.2	28.9	129.4	28.5	271.7	53.1	9420	0.619	96.5	206		2.3	3.1	6.3	68	1.8	35	0.23	0.45	1.3	0.35	2.8	1.2	0.5	1.3	0.17	2.7	1.2
C2a-05	JB17-C2a	Rim	3462	39	0.304885	98.3	140.5	151	207	<LOD	51.9729	844.946	4.55425	11.85	83.9	10.54	93.9	36.4	12.99	47.8	8.23	75.1	26.92	118.5	25.47	239.2	47.6	9210	0.89	97.9	210.5		4.2	12	13	170	8.6	26	0.54	0.92	4.8	0.55	6.9	2.2	0.72	3.1	0.38	2.4	0.9
C2a-06	JB17-C2a	Core	3472	30	0.259981	101.6	126.4	<LOD	193	<LOD	2.96213	508.946	0.74425	<LOD	9.39	0.043	0.733	1.75	0.444	10.66	3.62	43.3	16.48	77	17.9	180.1	34.9	9880	0.418	53.6	140.5		3.6	1.8	8.3	85	0.46	15	0.11	0.0069	0.31	0.012	0.085	0.15	0.035	0.64	0.14	1.7	0.58
C2a-07	JB17-C2a	Rim	3461	31	0.175229	94.2	150.7	12.7	152.5	<LOD	10.5248	747.946	2.23425	2.6	28.3	1.96	14.4	6.26	3.08	20.1	5.78	66.3	24.54	110	25.65	248.7	46.9	9800	0.743	121.6	248.7		2.6	3.4	6.2	130	1.2	22	0.19	0.47	2.2	0.34	2.7	0.68	0.41	1.1	0.27	2	0.81
C2a-08	JB17-C2a	Core	3462	29	<LOD	100.2	127	45.9	204	<LOD	14.5394	741.946	1.79425	5.55	34.8	4.16	27.4	11.42	13.72	26	6.73	68.9	24.04	105.2	24.08	231.6	45.2	9690	0.489	82.2	170.8		3.2	5.2	13	140	1.8	19	0.22	0.37	1.4	0.23	1.6	0.77	0.73	1.6	0.3	2	0.62
C2a-09	JB17-C2a	Rim	3450	28	0.18753	100.1	119.9	14	176.5	<LOD	10.8503	759.946	1.94425	2.47	29.8	1.52	11.7	6.17	2.44	18.56	5.54	62.4	24.79	112.6	25.27	245	49.24	9260	0.73	81.5	193.9		2.3	3.1	6.7	110	1.5	12	0.22	0.33	1.9	0.16	1.4	0.63	0.28	0.73	0.23	1.4	0.45
C2a-10	JB17-C2a	Core	3464	30	<LOD	100.7	132.4	17.5	189	<LOD	3.91695	664.946	1.06725	<LOD	11.84	0.076	1.25	2.7	0.749	14.39	4.77	56	22.03	101.3	22.99	225	44	9500	0.566	67.1	162.3		2.6	3.2	7.4	99	0.43	12	0.099	0.011	0.27	0.012	0.16	0.22	0.06	0.64	0.16	1.4	0.47
C2a-11	JB17-C2a	Core	3454	29	<LOD	100.1	125.7	<LOD	168.8	<LOD	3.7759	775.946	1.53425	0.64	15.96	0.346	3.19	3.56	0.997	17.75	5.71	66.9	25.91	118.5	25.91	253.2	49.46	9420	0.596	85.9	192.5		1.7	1.8	4.8	79	0.34	21	0.12	0.18	0.45	0.077	0.48	0.19	0.068	0.65	0.21	2	0.67
C2a-12	JB17-C2a	Core	3464	34	0.110744	92.9	125.4	366	314	<LOD	377.59	1492.95	23.3643	55.6	206	42.4	266	131	54.1	162.5	26.6	180.6	48.1	171	34.21	299.8	54.8	8660	0.75	144.9	230.1		3.5	28	12	170	27	84	2.2	2.5	12	2.6	14	10	3.5	8.4	1.2	8.3	2
C2a-14	JB17-C2a	Core	3462	35	<LOD	91.4	174.5	209	198	<LOD	59.0255	1478.95	7.60425	45.5	208	26.5	176	70.6	30.4	99	16.2	137.1	44.3	185.9	39.9	380	68	10190	1.26	154.3	325.8		5.3	15	12	150	4.7	120	0.68	8.5	33	3.8	23	7.5	3.3	12	1.5	9.2	2.1
C2a-15	JB17-C2a	Core	3481	45	0.285522	85.6	102.2	481	670	<LOD	275.597	1482.95	18.8643	100	529	76.3	497	159	71.3	184	26.2	160	41.3	145	27.8	237	46.5	8510	0.62	285.1	221.5		3.2	36	64	210	18	71	1.8	10	39	5.7	37	23	5.1	12	2.5	18	1.2
C2a-16	JB17-C2a	Core	3469	33	<LOD	97.6	118.5	<LOD	152.3	<LOD	6.47762	721.946	1.75425	0.305	15.92	0.33	2.72	3.16	1.06	15.64	5.25	60.9	24.01	111.5	25.46	248.6	47.4	10250	0.692	76.6	182.1		3.3	4.5	7.6	130	0.83	20	0.17	0.077	0.49	0.059	0.45	0.31	0.11	0.82	0.19	2.7	0.83
C2a-17	JB17-C2a	Core	3463	28	0.172	100.3	150.7	<LOD	640	1290	9.00573	644.946	1.17425	1.37	13.3	0.8	7.2	5.5	1.57	17.3	5.27	56.6	21.4	96.1	22.01	223.2	43.9	9710	0.319	75.3	182.5		6	4	340	860	1.3	25	0.18	0.32	1.1	0.19	2.4	1.4	0.42	1.1	0.39	3.2	1
C2a-19	JB17-C2a	Core	3463	34	<LOD	99.8	30.1	<LOD	52.2	<LOD	1.62754	236.546	0.47425	0.22	8.48	0.08	0.71	0.59	0.283	4.29	1.44	18.5	7.63	37.1	9.07	98.3	18.92	12790	0.509	26.7	102.6		3.1	3.6	5.9	160	0.35	8.8	0.12	0.12	0.64	0.043	0.31	0.14	0.098	0.49	0.12	1	0.33
C2a-20	JB17-C2a	Rim	3463	34	0.655236	77.7	118.3	1296	1060	<LOD	327.679	1566.95	22.6642	87.3	480	55.3	343	154	57.6	193	26.7	174.5	44.4	157.7	29.62	259.3	48.7	11030	0.838	117.5	212.2		3.3	78	100	210	15	70	1.5	5.6	31	3.3	22	10	3.6	12	1.1	7.8	1.3
C2a-21	JB17-C2a	Core	3459	28	<LOD	102.8	121.8	<LOD	240	<LOD	5.28409	809.946	1.31425	<LOD	15.68	0.139	1.95	3.6	1.07	19.33	5.96	70.7	26.54	121.8	26.92	259.7	49.7	9270	0.511	99.2	199.8		1.8	2	28	84	0.52	15	0.12	0.028	0.32	0.023	0.17	0.28	0.063	0.73	0.15	1.8	0.67
C2a-22	JB17-C2a	Rim	3470	35	0.12415	95.9	129.7	523	850	690	769.285	1770.95	22.8643	140.6	401	71.8	418	158	61.7	221	28.4	191.8	49.2	181.7	35.4	320	60	8810	0.88	123.2	227.6		4.4	40	29	240	67	89	1.9	9.6	23	6.2	30	6.2	4.7	16	1.7	8.4	1.8
C2a-23	JB17-C2a	Core	3466	29	0.265537	100.4	103.9	<LOD	198	<LOD	3.61314	685.946	0.95425	<LOD	11.4	0.111	1.56	2.94	0.98	16.27	5.43	59.6	22.8	101.5	23	218	41.5	9030	0.49	70.8	142.4		2.3	6	16	240	0.78	43	0.23	0.1	1.2	0.053	0.47	0.58	0.19	0.98	0.31	4.2	1.5
C2a-24	JB17-C2a	Core	3464	29	<LOD	101	129.7	<LOD	186.1	<LOD	4.11226	720.946	1.46425	<LOD	15.06	0.071	1.12	2.92	0.749	15.24	5.12	59.3	23.28	107.2	24.14	232.5	45.76	9410	0.603	90	179.7		2.4	2.2	6.6	86	0.49	13	0.12	0.012	0.47	0.013	0.13	0.2	0.064	0.66	0.15	1.5	0.59
C2a-25	JB17-C2a	Core	3440	42	0.382141	89.6	141.3	235	259	<LOD	132.373	1415.95	9.16425	49.8	148	27.8	192	83.3	35.2	105.5	17.2	142.2	43.1	170	36.2	328.3	58.4	8540	0.63	143	227		4.3	20	13	150	16	95	1	4.2	16	2.2	16	9	3.4	8	1.2	6.2	1.5
C2a-26	JB17-C2a	Core	3425	31	0.30081	96.2	151.6	75	300	<LOD	52.1899	1481.95	4.60425	21.6	85.7	9.6	57	22.9	8.7	49.7	13.11	136.2	48	202.8	42.4	377	70.1	8730	1.25	258.6	351.2		3.6	16	14	200	4.7	41	0.34	4.2	8	2	11	3.4	1	3.7	0.54	3.9	1.3
C2a-27	JB17-C2a	Core	3472	30	0.0786284	99.4	109.6	46.3	185	<LOD	11.2843	481.946	1.60425	4.14	22.8	3.19	22	7.35	7.66	15.5	3.86	40.2	15.7	72.4	16.5	164	31.7	9790	0.392	44	131		6.8	7.3	27	200	1.1	55	0.2	0.55	1.9	0.39	2.5	0.88	0.64	1.7	0.4	4.6	1.7
C2a-28	JB17-C2a	Rim	3415	34	<LOD	89.1	158.2	676	523	<LOD	185.54	1351.95	11.2643	62.8	244	35.1	212	72.9	46.5	101.2	15.5	131.5	41.1	170.7	34.43	315	63.7	9870	1.29	152.8	315.2		4.7	69	45	270	16	50	1.1	5.2	30	3.6	23	7.1	3.8	9.4	1.2	4.9	1.3
C2a-29	JB17-C2a	Core	3467	33	0.161124	102.2	109	18.1	160.1	<LOD	7.75795	607.946	1.22425	3.5	16.68	1.848	12.25	6.97	2.59	17.95	4.85	54.6	20.15	88.7	19.61	191.4	36.78	9110	0.364	63.1	126.1		3	3	8.9	210	0.93	14	0.15	0.18	0.56	0.091	0.79	0.41	0.22	0.69	0.21	1.2	0.67
C2a-30	JB17-C2a	Rim	3461	40	0.200185	81.6	153	673	194	890	419.906	1530.95	23.4642	124.5	399	61.9	393	161	66.8	199	25.6	154.6	37.6	134.7	25.59	227.6	43.7	11910	1.4	138	270.3		4.3	27	8.7	310	32	86	2.2	4.5	10	2.5	17	11	4	13	1.1	6.9	1.7
C2a-32	JB17-C2a	Core	3410	34	<LOD	100.1	123.2	72.3	311	<LOD	20.8325	868.946	2.04425	6.87	32.7	4.56	29.2	11.5	5.36	27.8	7.43	79.2	29.08	131.9	28.38	276.2	52.9	9190	0.557	105	227.4		3.4	7.5	14	150	2.5	18	0.23	0.85	2.4	0.52	2.9	1	0.45	1.3	0.24	2.4	0.79
C2a-33	JB17-C2a	Core	3459	42	0.362393	100.2	91.6	510	196	800	25.6067	513.946	2.35425	12.2	89	8	55	25.6	9.8	39	6.3	45.3	15.4	64	13.3	133	25.2	9830	0.53	45.7	109		5.9	110	34	440	6.3	99	0.66	3.8	28	2.6	17	7.8	2.7	10	1.5	9.2	2.5
C2a-36	JB17-C2a	Core	3466	28	0.167464	100.4	106.9	61.8	173	<LOD	10.6333	598.946	1.37425	17.3	40.6	10.3	65.8	25.5	8.9	34	5.73	52.2	18.6	83.5	18.21	182.1	35.5	9790	0.518	66.9	147.9		2.4	6	37	110	0.91	17	0.13	1.2	2.6	0.84	5.7	2.1	0.72	2	0.24	1.1	0.55
C2a-37	JB17-C2a	Core	3453	37	0.0512052	96.1	148.5	284	398	<LOD	73.6734	908.946	6.37425	18.3	89.4	12.5	79	32.9	19	51.4	10.17	90	30.5	128.2	29.7	290	52.1	10360	0.7	84.3	228.3		4.6	26	30	180	8.4	37	0.73	2.3	9.7	1.8	10	3.6	1.8	5.3	0.94	5.3	1
C2a-38	JB17-C2a	Core	3438	32	0.411612	99.1	169.7	222	237	<LOD	87.7788	1073.95	4.31425	15.6	65.2	9.4	77	31.9	12.6	53	11.07	101.7	36.2	156	33.61	320	59.6	10330	0.73	130.7	245		3.9	28	16	300	5.8	29	0.56	1.8	9.4	1.5	14	4.7	2	4.8	0.65	2.9	1.4
C2a-39	JB17-C2a	Rim	3459	41	0.444089	98.5	91.3	247	1443	1540	58.3745	684.946	4.52425	19.5	62.9	9.43	58.5	24.4	10.84	38.2	7.9	65.7	22.77	97.2	20.3	194.1	37.94	8310	0.363	51.6	111.4		2.7	91	62	310	3.5	20	0.45	1.5	4	0.55	4.9	1.8	0.81	2.2	0.49	2.5	0.78
C2a-40	JB17-C2a	Rim	3425	29	0.408154	88.83	139.1	506	1010	1110	175.775	2048.95	13.3643	83.7	424	46.9	289	118	53.4	166	24.7	179.3	53.3	206.6	42.27	387.6	70.3	9560	1.003	169.4	302.4		4.9	49	230	310	16	100	1.3	8.3	46	5	30	12	5.3	15	1.7	8.6	1.7
C2d-01	JB17-C2d	Core	3468	29	0.347779	99.5	108.1	16.7	207	<LOD	6.22806	1418.95	1.06425	2.85	20.7	2.36	16.2	13.3	5.19	42.1	11.4	122	43.5	191	41.2	385	71	9020	0.7	154	205		2.1	6.9	15	160	0.73	140	0.11	0.7	2.8	0.64	3.1	1.7	0.78	3.4	1	11	3.8
C2d-02	JB17-C2d	Core	3467	31	<LOD	99.8	85.1	<LOD	248.4	<LOD	6.15211	1938.95	1.20425	<LOD	10.31	0.158	4.34	9.16	2.26	53.1	16.8	180	62.4	247	48.8	411	66.1	8540	0.692	76.5	131.8		2.2	3.1	9.6	100	0.74	130	0.15	0.01	0.52	0.021	0.51	0.93	0.2	3.9	1.2	12	3.9
C2d-03	JB17-C2d	Core	3456	34	0.176034	100.5	3.07	<LOD	83.5	<LOD	4.94773	402.946	0.33125	<LOD	2.92	0.065	0.84	1.72	0.721	8.59	2.92	35.4	13.46	63	15.66	170.5	33.46	10520	0.402	53.3	139.7		0.74	2.2	5.7	110	0.56	11	0.072	0.014	0.13	0.019	0.22	0.27	0.081	0.59	0.16	1.4	0.47
C2d-04	JB17-C2d	Core	3457	28	0.198374	99.5	97.6	<LOD	353	<LOD	6.53187	1482.95	1.47425	1.02	11.27	0.696	5.14	6.49	1.92	31.1	10.47	121.4	45.6	200.9	43.2	400	72.8	8590	0.78	99.1	192.5		3.2	2.1	12	100	0.58	80	0.14	0.1	0.61	0.064	0.57	0.61	0.22	1.8	0.59	5.8	1.9
C2d-05	JB17-C2d	Core	3460	27	<LOD	99.6	160.3	33.8	178	<LOD	6.36912	534.946	0.66325	0.218	4.41	0.191	1.78	1.85	0.98	9.99	3.46	43.3	17.51	85	20.82	223.2	48.6	9700	0.49	92.5	229.4		3.1	4.4	25	81	0.61	27	0.089	0.032	0.23	0.025	0.23	0.23	0.12	0.73	0.22	2.7	0.97
C2d-06	JB17-C2d	Core	3458	31	0.218991	99.9	84.3	10.6	161	<LOD	4.19906	909.946	0.91425	0.79	11.3	0.67	7.3	5.99	3.83	25.9	7.86	90.9	32.8	137.1	29.53	279.5	49.6	10980	0.6	74.4	184.8		2.8	3.5	14	100	0.5	44	0.12	0.39	1.9	0.22	1.7	0.81	0.85	1.7	0.44	4.9	1.6
C2d-07	JB17-C2d	Rim	3472	28	<LOD	91.9	164.1	699	221	<LOD	22.8941	1221.95	3.21425	1.52	18.2	1.3	11	7.06	4.38	22.1	7.29	93.5	40.1	189.4	43.1	418	85.1	9790	1.41	140.4	319		3.6	85	12	110	2.1	42	0.28	0.21	1	0.17	1.4	0.75	0.49	1.2	0.33	3.8	1.4
C2d-08	JB17-C2d	Core	3461	29	0.157144	96.5	121.2	24.1	287	<LOD	8.43067	1397.95	1.29425	1.57	17.25	1.3	10.51	9.59	3.51	34.6	10.83	120.7	43.6	188	41.2	381.5	67.5	8880	0.736	108.5	172.8		2	4.9	23	85	0.52	84	0.12	0.13	0.9	0.079	0.62	0.57	0.2	2.2	0.71	7.4	2.5
C2d-09	JB17-C2d	Core	3470	33	0.264258	88.6	107.4	356	355	<LOD	17.7945	2468.95	2.36425	4.43	36	4.6	39.1	24.6	10	77.1	21.7	232	79	315	62.7	527	86.9	8530	1	213	231		2.6	47	36	120	2	170	0.23	0.85	6.2	1.1	6.2	3.7	2.3	7.6	1.7	16	5.4
C2d-10	JB17-C2d	Rim	3463	28	<LOD	100.4	147.1	<LOD	165.8	<LOD	5.29494	1208.95	0.94425	0.45	10.26	0.568	6.09	7.65	2.77	31.9	9.94	112.5	40.8	175.9	38.11	360.2	70.06	9060	0.613	154.3	256		2.6	2.8	7.5	86	0.65	26	0.1	0.13	0.6	0.082	0.43	0.52	0.19	1.1	0.24	2.6	0.67
C2d-11	JB17-C2d	Core	3468	36	0.140527	90.6	132.3	166	405	<LOD	17.3605	2838.95	2.70425	23.6	150	17.8	117.2	52.7	26.7	99.7	25.1	267	88.2	356	71.5	606	105.9	8130	0.931	1090	366		1.7	16	29	200	1.9	130	0.25	1.9	10	1.3	9.1	2.9	2.5	5	1.5	14	3.9
C2d-12	JB17-C2d	Core	3465	28	<LOD	103.6	125.5	14.8	564	<LOD	9.65675	3220.95	3.52425	1.48	30.3	1.71	14.7	17.4	6.16	77.6	25.22	290.1	100.6	408.1	83.3	703	115.8	8190	1.4	231	274.7		3.4	5.1	14	110	0.43	70	0.27	0.22	1.6	0.27	1.8	1.7	0.62	2.8	0.81	6	2.1
C2d-13	JB17-C2d	Rim	3443	28	0.15714	82.6	128.4	316	274	<LOD	19.0965	1298.95	1.74425	12.7	96	13.2	101.3	63.2	36.2	81.4	14.2	115.4	39.7	173	38.9	397	76.7	9300	0.764	422	389		1.5	18	21	120	1.7	130	0.21	1.4	10	1.4	9.2	7.6	3.2	8.5	1.6	9.8	3.2
C2d-14	JB17-C2d	Rim	3467	32	0.335064	99.5	114.8	34.4	149.3	<LOD	3.12488	482.946	0.48025	4.2	30.9	3.41	21.2	11.6	5.2	16.7	3.7	39.5	14.96	71.7	17.29	181.9	41.67	10692	0.45	73.2	214.3		3.1	5.9	9.1	210	0.77	12	0.099	1.3	8.2	0.82	5.1	2.6	1.1	2.2	0.24	1.4	0.26
C2d-15	JB17-C2d	Core	3460	30	<LOD	100.1	14.1	<LOD	193	<LOD	4.55712	531.946	0.59425	<LOD	4.41	0.067	0.71	1.36	0.571	8.09	2.95	38.8	17.38	88.5	22.39	246.2	53	8950	0.546	68.5	201.8		2.2	2.2	13	95	0.45	26	0.097	0.02	0.4	0.023	0.18	0.24	0.053	0.58	0.15	2.1	0.87
C2d-17	JB17-C2d	Core	3452	31	<LOD	100.5	104.3	1110	334	<LOD	48.8263	1290.95	1.75425	1.042	13.25	0.907	7.18	8	2.54	34.8	10.55	122.6	43.5	185.9	39.6	342	62	6440	0.765	100.3	168.1		2.4	430	25	120	4.1	69	0.2	0.067	0.42	0.052	0.42	0.67	0.2	2.4	0.56	5.4	1.5
C2d-18	JB17-C2d	Core	3473	29	<LOD	99.8	101.2	<LOD	186.1	<LOD	3.59144	671.946	0.81325	0.256	6.07	0.267	2.13	2.28	0.91	12.2	4.29	51.4	21.34	102.3	25.33	271.8	57.9	9010	0.448	96.1	231.3		2.3	2.5	7.8	110	0.52	27	0.091	0.066	0.49	0.063	0.3	0.28	0.13	0.91	0.26	2.4	0.95
C2d-19	JB17-C2d	Core	3473	29	<LOD	93.6	87.6	554	288	<LOD	16.7094	1899.95	1.98425	4.34	31.7	3.12	21.1	15.6	6.26	52.4	15.3	172	59.8	247	49.8	426	76.2	7140	0.84	145.6	190.9		6	40	13	130	2.1	88	0.24	0.84	2.9	0.57	3.1	1.3	0.65	3.6	1.2	11	3.2
C2d-20	JB17-C2d	Core	3475	31	<LOD	98.2	124.3	29.4	201	<LOD	6.51017	2075.95	1.79425	3.29	24.1	2.13	17.99	16.6	7.46	57.4	16.22	177.8	63.1	264	57.4	543	94.4	9470	0.945	243.9	308.2		4.1	5.5	11	110	0.7	66	0.2	0.29	1.2	0.15	0.9	1.1	0.46	2.4	0.54	5.8	1.9
C2d-21	JB17-C2d	Core	3459	31	<LOD	96.5	123.9	3140	111.6	<LOD	31.8998	708.946	0.63425	0.86	8.26	0.533	4.07	4.21	1.61	19.6	5.95	65.8	23.9	102.7	23.7	229.3	44.7	9760	0.529	98.4	201		4.6	240	8.3	130	5.4	46	0.12	0.22	0.7	0.083	0.59	0.35	0.15	1.6	0.5	4.5	1.8
C2d-22	JB17-C2d	Rim	3470	29	0.0771875	89.8	114.2	348	612	<LOD	36.3484	2228.95	2.35425	4.87	50.9	4.87	47.1	32.7	13.84	72.9	18.4	186	68.6	282	57.3	506	88.1	7740	1.14	275.8	238		4	16	24	140	2.5	190	0.32	0.46	3.5	0.32	2.4	1.8	0.72	5.6	1.5	13	4.6
C2d-23	JB17-C2d	Core	3453	29	<LOD	100.5	99.7	18.6	357	<LOD	6.07616	1491.95	1.31425	0.453	10	0.5	4.75	6.44	2.65	32.77	11.07	128.9	46.4	194.2	40.3	351.1	59.84	8800	0.693	73.2	129		2.6	3.7	14	100	0.55	45	0.14	0.045	0.35	0.055	0.38	0.54	0.21	0.94	0.51	3.5	1.5
C2d-24	JB17-C2d	Core	3468	30	0.208134	91.9	66.1	42.3	327	<LOD	12.1523	1977.95	2.18425	3.02	38.3	3.23	26	17.6	13.6	55.3	15.91	178	62.2	250	53.4	463	79.7	8620	0.911	176	226		6.6	5.1	11	100	1.1	87	0.16	0.46	4.6	0.47	3.6	1.6	1.5	3.3	0.99	10	2.9
C2d-25	JB17-C2d	Rim	3459	35	<LOD	99	166.9	7190	269	<LOD	594.596	2058.95	2.61425	1.77	17.7	1.62	13.3	10.91	5.12	48.6	15.11	170	61.4	274	59.3	553	105	8140	1.08	248	344		4.1	730	17	130	57	150	0.21	0.19	1.1	0.24	1.6	0.74	0.48	3.4	0.8	11	3.9
C2d-26	JB17-C2d	Core	3466	27	<LOD	99.8	137.5	104.2	260	<LOD	5.8049	791.946	0.96425	0.129	7.78	0.143	1.99	2.53	1.128	13.42	4.93	62	25.7	122.3	30.9	318	63	8770	0.622	72.2	183		4.6	8.3	15	100	0.67	33	0.12	0.026	0.34	0.019	0.22	0.26	0.081	0.91	0.28	3.3	1.4
C2d-27	JB17-C2d	Core	3457	34	<LOD	100.7	37.7	8.3	161.1	<LOD	5.02368	494.946	0.72425	0.334	6.13	0.303	3.05	2.54	1.01	8.56	3.08	39.5	16.01	80.7	20.6	233.1	48.9	9460	0.44	78.9	188.8		1.2	2	9.6	100	0.82	23	0.12	0.076	0.33	0.065	0.7	0.37	0.15	0.48	0.17	1.6	0.75
C2d-28	JB17-C2d	Core	3459	30	<LOD	99.6	117.4	<LOD	213	<LOD	4.35096	620.946	0.67425	<LOD	5.26	0.04	0.83	1.53	0.693	9.41	3.71	47.5	20.2	99	24.8	262	53	9440	0.546	65	182.5		2.8	2.2	17	88	0.54	48	0.14	0.01	0.43	0.012	0.13	0.27	0.069	0.79	0.36	3.9	1.5
C2d-29	JB17-C2d	Rim	3463	34	0.297702	100	125	260	430	660	943.975	4588.95	5.38425	2.89	39.7	2.04	20.3	27.4	8.47	140	43.1	466.5	154.9	587	114.5	955	150.6	8490	1.62	263	335		3.2	39	23	220	120	130	0.35	0.33	2.1	0.22	1.5	1.6	0.66	6.1	1.2	9.8	4.4
C2d-30	JB17-C2d	Core	3430	29	0.298788	92.3	130.7	45.7	177	<LOD	9.61335	652.946	1.07425	1.9	23.8	2.81	25.2	12.91	7.06	22.65	5.27	56.8	20.86	98.7	23.71	244.9	51.2	8770	0.59	147.5	219.5		4.1	3.1	12	100	0.65	21	0.13	0.13	1.3	0.19	1.5	0.72	0.39	0.95	0.21	1.8	0.55
C2d-31	JB17-C2d	Rim	3475	33	0.322578	98.5	159.2	755	134.3	<LOD	13.3458	846.946	0.76425	1.19	8.91	1.01	7.84	5.89	2.48	20.1	5.95	71.7	28.07	127.8	29.6	293.6	63	9540	0.56	140.2	272		4.5	29	9.8	290	1.8	28	0.27	0.27	0.41	0.18	0.91	0.97	0.19	1.2	0.39	2.1	0.8
C2d-32	JB17-C2d	Rim	3458	28	<LOD	99.7	146.2	9.2	248	<LOD	6.24976	812.946	1.12425	1.16	14	1.09	8.8	5.31	3.06	15.46	5.09	62.4	25.3	125.6	31.5	327	69.6	8390	0.669	125.9	256.6		2.7	3.5	13	98	0.46	37	0.11	0.17	0.65	0.14	1.3	0.52	0.34	0.69	0.2	2.6	1.1
C2d-33	JB17-C2d	Core	3464	33	0.129845	99.4	160.2	13.4	156.3	<LOD	4.88263	630.946	0.54425	0.293	10.4	0.338	5.1	5.8	1.79	40.2	10.62	111	40.88	158.1	33.12	280.7	51.2	9760	0.485	111.6	263.3		5.8	4.5	6.7	69	1	12	0.15	0.071	2.6	0.115	1.8	1	0.59	4.3	0.48	3.5	1.24
C2d-34	JB17-C2d	Rim	3476	28	0.217436	102.9	34.8	<LOD	172	<LOD	3.89525	479.946	0.53925	<LOD	3.84	0.057	0.93	1.49	0.549	8.39	3.04	39.3	15.25	74.5	18.26	194.3	40.39	9430	0.481	42.1	128		1.5	1.6	10	59	0.36	21	0.056	0.015	0.23	0.012	0.11	0.17	0.05	0.6	0.18	2.3	0.65
C2d-35	JB17-C2d	Core	3456	29	0.189054	99.4	85.3	105	216	<LOD	5.59875	572.946	0.66425	0.402	8.02	0.286	4.39	4.45	1.24	33.5	8.11	84	29.12	115.4	25.61	205.4	42.2	8290	0.418	54.3	115		3.2	23	10	100	0.63	25	0.11	0.048	0.34	0.055	0.43	0.48	0.16	1.3	0.41	2.5	0.95
C2d-36	JB17-C2d	Rim	3461	34	<LOD	98.9	88.9	592	427	<LOD	12.4074	3438.95	2.38425	0.165	17.27	0.448	8.42	16.89	4.65	96.2	30	331	113.5	439	83.8	695	116.9	7760	1.08	171.8	228.7		2.3	38	17	130	1.1	120	0.18	0.025	0.48	0.05	0.57	0.92	0.25	4.3	1.1	12	3.4
C2d-37	JB17-C2d	Core	3476	34	0.262642	99.1	160.6	28.6	143.6	<LOD	4.95858	762.946	0.77425	4.3	16.7	2.26	14.8	6.03	5	18.71	5.7	66.6	25.68	118.3	28.13	289	58.6	9880	0.549	154.8	359		4.6	7.7	7.7	130	0.53	27	0.13	1	2.6	0.4	2.9	0.49	0.69	0.97	0.32	2.4	0.98
C2d-38	JB17-C2d	Core	3471	28	<LOD	99.9	145.3	24.9	143.8	<LOD	6.02191	671.946	0.63725	0.355	10.07	0.78	6.38	4.98	2.43	16.45	4.93	57	22	101.3	24.29	255.6	53.5	9430	0.535	124.4	247.2		2.5	3.5	6	110	0.58	16	0.098	0.072	0.52	0.061	0.48	0.32	0.16	0.75	0.16	1.8	0.63
C2d-39	JB17-C2d	Rim	3454	28	0.233671	99.5	64.1	40.3	142	<LOD	5.15388	491.946	0.42925	4.51	28.2	3.8	28.5	16.26	8.27	24.8	4.45	42.9	15.89	72.2	16.87	174	38	10230	0.404	166.5	246.9		2.1	3.2	10	99	0.64	12	0.085	0.29	1.3	0.23	1.5	0.8	0.4	1.1	0.15	1.3	0.46
C2d-40	JB17-C2d	Core	3462	29	0.152775	99.1	114.6	7.2	420	<LOD	8.28962	3733.95	3.07425	0.378	27	0.643	9.91	19.12	4.78	104.1	32.54	352.5	121.9	476	92.5	765	126.8	8540	1.327	221.2	292.7		2.6	2.7	23	82	0.54	70	0.17	0.082	1.8	0.074	0.72	0.77	0.2	3.3	0.89	8.3	3
C5b-01	JB17-C5b	Core	3281	38	2.83293	53.3	149.7	684	103.1	3020	52.7324	1027.95	8.88425	26.2	213	27.1	157	72.2	16.2	78.6	12.66	99.5	31.65	139	29.96	298.9	59.1	11970	0.73	154.1	653		4.4	69	7.2	420	3.2	30	0.43	2.4	15	2.8	15	7.5	1.3	3.9	0.59	3.9	0.95
C5b-03	JB17-C5b	Core	3420	29	0.448958	93.3	156.5	102.3	140.7	<LOD	9.25529	873.946	2.17425	8.45	60	5.41	35.4	21.2	4.13	40.6	9.47	86.8	29.62	125.4	26.43	237.6	44.5	9550	0.623	93.6	278.7		3.6	5.6	7.3	190	0.89	24	0.18	0.43	2.4	0.26	1.6	1	0.24	1.6	0.4	2.6	0.86
C5b-04	JB17-C5b	Core	3259	30	1.36133	85.9	205.6	682	230	2750	18.12	2488.95	7.86425	8.1	82.2	4.67	28.3	27.8	4.91	81.9	22.1	219	76.5	316	66.3	573	105.1	9970	2.2	561	739		7.1	30	15	380	1.9	110	0.79	1	8.1	0.5	3.9	3.2	0.55	8.4	1.8	12	4.8
C5b-05	JB17-C5b	Core	3476	28	0.318764	98.2	152.2	86	194	<LOD	6.00375	1866.95	4.16425	0.46	23.3	0.89	8.37	10.28	2.12	43.6	13.86	156.4	59.6	252.4	53.3	482	87.1	8450	1.682	223.2	347		2.9	10	11	120	0.53	90	0.22	0.16	1.2	0.1	0.7	0.73	0.2	2	0.57	5.6	2
C5b-06	JB17-C5b	Core	3309	27	1.05857	73.3	189.7	163.7	108.9	830	21.9176	897.946	4.50425	8	69.9	6.29	39.3	22.1	5.95	39.2	9.11	87.8	30.16	130.8	28.02	253.8	45.8	10230	0.93	230	463		7	8	7	170	1.7	25	0.2	0.43	2.6	0.28	3.2	1.4	0.39	1.7	0.3	3.1	0.9
C5b-07	JB17-C5b	Core	3259	33	0.645916	79.1	191.3	240	179.6	930	12.8033	1268.95	4.14425	16.6	152	21.1	130	44.1	35.3	69.5	14.1	122	40.1	166	35.4	325	60.2	10400	2.91	176	456		5.9	27	9.1	220	1.1	110	0.42	2	21	3.2	19	5.7	5.2	7.7	1.3	11	3.1
C5b-08	JB17-C5b	Core	3361	31	2.69521	62.7	166.3	574	159.7	2940	150.71	1222.95	9.39425	420	920	104.3	578	264	64.6	244.5	27.95	152.2	39.08	155.2	32.87	317.4	61.4	10970	0.722	806	495		3.4	28	8.6	310	5.9	39	0.44	55	100	9.5	42	8.4	2.3	7.2	0.7	4.2	0.87
C5b-10	JB17-C5b	Rim	3260	31	0.65428	80.5	179.6	183	7700	21100	7.20459	1451.95	5.71425	7.6	48.6	4.84	29.5	18.9	2.92	52.3	14.17	142.9	47.9	197.2	40.5	355	59	9990	1.04	239.2	520		6.6	17	780	1500	0.97	60	0.67	1.2	4.3	0.8	4.3	2.3	0.29	3.8	0.63	5.2	1.4
C5b-11	JB17-C5b	Core	3356	50	0.574769	84.5	209.2	431	478	1340	44.1607	1455.95	5.02425	11.4	99	10.2	90	54.8	19.1	74.9	14.54	133.9	44.9	190.6	40.9	383	64.7	10070	0.891	226	478		4.7	36	51	310	6.9	31	0.41	1.3	11	1.2	13	6.8	2.6	6	0.59	4.7	1.3
C5b-12	JB17-C5b	Core	3446	32	0.795544	94.4	149.7	136	150.2	<LOD	11.7834	1263.95	10.3443	11.12	108	13.82	124.8	75.2	22.1	107.9	17.19	136.2	40.3	162.8	33.05	292.2	53.2	9430	0.56	123.7	275.8		4.8	11	8.6	160	0.85	19	0.63	0.67	6.2	0.99	7.4	4.9	1.3	5.5	0.56	3.8	1.2
C5b-13	JB17-C5b	Core	3233	32	1.12815	98.8	150.9	26500	139	1890	10.5248	753.946	4.12425	17.34	66.5	6.77	37.2	19.3	14.31	35.2	7.37	70	23.84	106.7	23.4	227.9	44.7	6710	2.08	278.7	418		4.2	1400	14	320	1.5	30	0.3	0.95	3.4	0.31	2.6	2	0.99	2	0.48	3.7	0.89
C5b-14	JB17-C5b	Core	3434	29	1.12525	85.5	141.3	215	175	470	35.0464	1154.95	7.84425	13.8	125.4	19.7	160.8	66	19.8	76.3	12.65	110	38.2	165.8	36.5	327	59.9	9040	1.58	248	301		2.9	18	14	180	2.3	34	0.59	0.78	6	1.1	8.9	3.2	1.1	4	0.4	3.6	1.3
C5b-15	JB17-C5b	Core	3388	31	0.771286	79.6	187.8	214	2510	7900	10.0908	1293.95	3.90425	20.1	146	17.5	103	43.5	22.8	66	14.33	122.2	40.3	168.4	36.7	337	58	10510	1.3	127.7	388		5.9	20	290	1400	1.1	65	0.21	2.2	12	1.9	11	4.8	1.8	4	0.75	5.9	1.2
C5b-16	JB17-C5b	Core	3451	32	0.815781	86.5	137.4	28.5	121	<LOD	7.92071	656.946	6.06425	2.22	34.2	2.1	14.9	8.4	2.61	22.8	6.15	61.7	22	94.6	21.19	204.2	35.2	10160	0.312	65.3	213		3.7	4.8	10	140	1.3	30	1	0.4	4.6	0.37	2.3	1.1	0.3	1.5	0.5	3.4	1.2
C5b-17	JB17-C5b	Core	3429	30	0.341862	94	194.9	93	226	<LOD	18.337	1288.95	3.41425	9.3	72	5.8	39.1	26.6	4.86	56.4	14	124	40.8	170.3	36.47	326	59.2	9900	0.649	153	371		4.6	18	8.2	140	4.8	110	0.58	1.7	15	1.1	6.3	5.3	0.62	9.2	2	11	2
C5b-18	JB17-C5b	Core	3373	31	0.441594	87.2	182.1	125	140.9	340	17.3062	1287.95	4.00425	5.85	71.3	5.64	49	50.4	15.38	99.8	16.74	130.3	40.2	161	33.5	302	52.3	9790	0.843	226.5	369.5		4.1	14	8.2	140	0.88	77	0.17	0.34	2.2	0.32	2.9	2.3	0.73	3.6	0.5	4.7	1.8
C5b-20	JB17-C5b	Rim	3105	33	1.5316	63.24	183.6	441	109.2	3630	13.9969	979.946	4.52425	35.9	140	15.6	107.2	28.8	12.2	43.7	9.66	94.6	33.2	141.4	30	276	49.8	10700	1.73	295	702		6.6	18	4.9	230	2	40	0.31	4.3	15	2	9.3	3.3	1.5	3.6	0.5	3.7	1
C5b-21	JB17-C5b	Core	3413	35	0.436334	76	157.8	102	172.8	<LOD	32.7679	1168.95	5.01425	9.05	102.3	5.91	36.2	30	4.59	64.1	15.2	126.7	38.8	152.2	29.8	260	46.4	9640	0.9	189	383		3.2	13	9	200	2.7	96	0.52	0.8	8	0.57	2.8	2.2	0.38	4.7	1.1	9	2.8
C5b-22	JB17-C5b	Core	3423	29	0.896495	90.8	183.5	116	158	530	27.6682	1295.95	3.20425	16.5	108	10	61.1	36	7.5	59	12.59	120.9	40.9	167.5	35.18	325.2	54.5	10040	0.732	160.2	355		5.3	11	12	190	3.3	73	0.34	2.6	10	1.1	6.3	4.6	0.94	4.6	0.6	4.3	1.1
C5b-23	JB17-C5b	Core	3333	31	<LOD	95.7	178.7	11.3	180	<LOD	6.19551	1113.95	3.61425	0.187	22.82	0.116	1.82	4.3	1.216	29.6	9.81	110.5	38.32	166.4	34.02	296.1	52.98	9760	1.116	173.8	395		5	2.9	7	140	0.56	24	0.22	0.045	0.62	0.02	0.23	0.32	0.078	1.2	0.33	2.9	0.99
C5b-24	JB17-C5b	Rim	3037	29	4.31346	47.8	155.4	1116	75.2	8700	20.507	1728.95	11.1143	14.2	93.7	7.19	39.1	29.1	4.92	60.5	14	133.2	47.1	216	48.6	475	82.6	12210	2.67	485	1118		2.8	55	4.7	440	2.1	110	0.61	1.5	7.3	0.68	3.4	3	0.47	5.2	1.1	8.8	2.5
C5b-25	JB17-C5b	Core	3446	31	0.482954	98.4	159.1	41.8	137.7	<LOD	18.771	884.946	3.37425	3.5	44.4	3.97	27.6	20.5	3.62	38.9	8.73	83.3	29.5	126.6	27.6	254	48.6	9890	0.561	87.5	235		3.8	4.2	9.3	160	2.3	54	0.48	0.45	2.9	0.39	2.7	1.5	0.41	3	0.61	5.6	1.9
C5b-26	JB17-C5b	Core	3432	29	<LOD	100.3	149.8	7.7	158	<LOD	8.35274	640.946	1.10425	0.151	10.56	0.174	1.52	2.55	0.773	13.28	4.65	54.28	20.78	96.2	22.18	208.1	39.48	9770	0.409	58.7	200.1		3.7	1.6	8	130	0.57	10	0.15	0.022	0.26	0.028	0.21	0.22	0.063	0.61	0.16	0.84	0.41
C5b-27	JB17-C5b	Core	3421	29	0.260498	91	183.7	49.1	117	<LOD	15.7329	1164.95	3.73425	3.98	47.2	2.74	19	21.3	3.4	54.1	13.1	120.4	39.2	161.2	33.9	310	53.2	10660	0.91	157	351		5.8	9.1	7.3	120	2.1	62	0.3	0.72	4.3	0.5	2.8	3	0.42	5.5	0.83	5.3	1.4
C5b-28	JB17-C5b	Core	3350	35	2.72434	70.9	135.8	247	227	2120	13.6714	2101.95	5.18425	7.43	63.5	6.8	41.7	25.2	3.84	54.1	14.87	161.2	61.2	282.2	60.8	574	106	8480	2.96	399	462		5.7	24	15	340	1.7	72	0.39	0.95	5.4	1	4	2.7	0.36	2.8	0.7	5.6	1.6
C5b-29	JB17-C5b	Core	3429	37	<LOD	98.9	151.8	26.8	114.5	<LOD	7.26416	766.946	1.67425	0.61	27.2	1.58	12.3	7.8	4.42	23.3	6.61	70.1	24.7	110	24.1	228	41.1	10100	0.49	79.1	199.2		4.9	5	9.7	150	0.7	27	0.31	0.18	1.3	0.13	1.3	0.67	0.38	1.8	0.33	3.5	1.4
C5b-31	JB17-C5b	Core	3445	29	0.948569	98.2	139.3	118	320	590	21.3751	998.946	6.58425	11.7	114	9.5	68	33.2	16	58.7	13.6	113.6	35.7	137	27.65	241.2	42.64	10250	0.773	131.1	291		3.2	21	88	180	2.7	37	0.79	1.8	17	1.5	10	5	2.4	6.2	1.4	7.6	1.5
C5b-32	JB17-C5b	Core	3384	30	1.50565	89.9	183.8	157	156.9	520	36.891	1112.95	5.02425	14.38	232	10.4	63.2	33.8	10.68	60.3	13.24	117.2	38.5	155.6	32.46	280.6	49.76	9510	0.765	277	410		6.5	16	8.6	170	4.7	31	0.4	0.87	36	1.1	6.4	3.6	0.76	4.6	0.74	4.6	1.2
C5b-33	JB17-C5b	Core	3426	27	0.32313	100.5	148.1	55.5	113.2	<LOD	8.47407	735.946	1.75425	6.44	55.4	3.09	19.9	17.6	3.19	42.1	9.27	77.2	24.41	101.2	21.71	204.3	38.01	10080	0.607	94.4	200.9		3.1	3.9	5	83	0.76	17	0.16	0.3	2.9	0.19	1.4	1.1	0.2	2	0.41	2.5	0.57
C5b-34	JB17-C5b	Rim	3353	36	0.468285	86.9	173.6	137	213	880	15.2989	1271.95	2.81425	114	182	30.5	139	53.2	8.04	72.3	14.09	127.3	43.8	181	38.6	339.1	61.8	9330	0.712	179.2	376		4	23	12	250	1.6	59	0.28	22	20	5.1	16	4.9	0.64	3.5	0.68	4.6	1.8
C5b-35	JB17-C5b	Core	3424	31	0.915536	80.9	151.5	1420	261.5	1630	37.542	2455.95	7.51425	33.2	236	20.4	126.4	66.6	25.7	124.3	26.8	237.5	76.1	309.9	62.8	554	102.1	7860	3.92	328	471		3.7	300	9.7	230	2.1	81	0.44	2.7	14	1.6	9.4	5	1.7	7.8	1.5	7.1	2.1
C5b-36	JB17-C5b	Core	3484	33	0.260359	98.7	161.3	32.1	196.4	<LOD	6.13041	891.946	3.84425	0.327	15.37	0.254	2.68	3.15	0.797	17	5.86	72.7	30.04	141.2	31.86	299.9	58.9	8330	2.04	142.6	245.4		4	4	6.9	150	0.67	12	0.36	0.041	0.43	0.041	0.21	0.21	0.067	0.85	0.17	1.8	0.81
C5b-37	JB17-C5b	Core	3117	48	0.267722	72.4	161.5	179	174.9	590	143.224	1487.95	15.4642	18.5	163	19.6	139	90.2	19.1	115.4	19.8	149.5	46.4	187	39.2	350	63.4	9070	0.836	535	354		3.3	13	7.2	260	12	86	1.7	1.2	11	1.8	10	8.4	1.3	8.9	1.2	8.7	2.2
C5b-39	JB17-C5b	Core	3464	34	2.00172	88.7	210	137	294	1390	14.5394	1551.95	8.00425	9.4	90	5.5	34.5	22.4	4.44	61.3	15.21	149.2	50.1	196.6	39.44	333	56.6	9060	1.35	388	655		8.8	20	54	420	3.1	47	0.95	1.5	12	1.1	7.3	3.7	0.7	5.3	0.87	5.2	1.9
C5b-41	JB17-C5b	Core	2928	60	2.18587	25.4	141.4	1190	215	6370	89	3550	30.1	66	497	54	414	316	45	504	86	562	129	406	72.8	567	89.2	10830	9.79	650	2060		5.6	190	17	950	25	350	3.9	13	95	10	71	39	4.9	61	12	67	13
C5b-42	JB17-C5b	Rim	3456	34	0.284885	93.2	153.3	33	99	<LOD	5.7	930	4.22	0.51	22.9	0.31	2.24	3.58	0.96	20.2	6.53	77.4	31	136.5	31.4	286	51.8	9900	1.03	89.2	240.4		6.2	16	12	480	1.2	40	0.54	0.23	3	0.12	0.86	0.87	0.18	2.8	0.55	6.2	2.3
C5b-43	JB17-C5b	Rim	3389	37	1.22201	71.7	176	360	138	<LOD	110	1300	7.3	39	290	37	350	224	55	221	27.2	168	45.3	161	32.2	288	49.7	9990	0.98	184	433		12	120	16	570	43	210	1.9	13	97	13	110	74	18	67	7.8	37	7.8
C5b-44	JB17-C5b	Core	3468	35	0.480931	87.5	162	71	154	<LOD	16.9	980	3.09	5.5	64	3.8	22.9	21.1	3.31	49	12.2	105	32.8	133	28.6	275	47.4	9780	0.559	131	253		11	25	18	390	4.5	140	0.6	1.7	17	1	6	5.8	0.84	11	2.5	19	4.6
C5b-45	JB17-C5b	Core	3256	37	0.840377	82.4	211.3	98	264	1170	12.6	1925	5.51	3.66	59.4	2.26	17.3	18.2	3.74	67.8	18.77	196	67.7	277	57.1	529	88.9	9310	1.03	352	558		6.8	20	18	460	2	90	0.57	0.39	4.1	0.15	1.2	1.6	0.42	3.4	0.92	9.3	2.7
C5b-47	JB17-C5b	Rim	3420	37	2.58304	70.5	144.3	247	184	<LOD	58	1160	5.02	45.3	209	28.8	230	140	31.4	188	22.4	136	36.9	147	30.9	271	51.1	9280	0.39	251	340		7.8	38	23	600	10	110	0.62	4.9	26	3.7	28	13	3.8	24	2.5	16	3.5
C5b-48	JB17-C5b	Core	3468	40	<LOD	93.2	174.8	200	213	<LOD	29	796	1.85	1.21	18.2	0.673	3.9	5.5	1.1	19.4	5.66	72.7	27.1	122	28.9	254	47.7	10020	0.48	75.7	237		7.1	110	21	600	15	47	0.23	0.33	1.3	0.089	1	1.2	0.27	2.4	0.62	5.5	1.7
C5b-49	JB17-C5b	Core	3413	44	1.08135	63.8	192.1	305	139	<LOD	51	1397	14.3	12.2	111	9.7	70	43.3	6.97	87.7	18.3	159	46.3	187.1	39.4	357	70.3	12040	1.29	185	514		7.2	52	18	590	23	67	2.1	2.2	15	1.6	12	7.3	0.93	9.8	1.6	10	2.4
C5b-50	JB17-C5b	Rim	3217	36	1.26528	72	178.5	390	172	1400	12.9	1077	5.42	36.9	156	18.9	112	64	10.6	94.6	17.2	129.8	35.8	140.6	30.04	263	49.7	10760	2.59	127	402		7.7	53	20	440	2.2	57	0.79	3.4	23	2.5	19	10	1.7	9.2	1.7	8.9	1.5
C5b-52	JB17-C5b	Core	3466	44	<LOD	97.9	121.1	<LOD	131	<LOD	10.9	628	1.69	2.83	27.8	3.25	23.3	17.1	3.98	28.6	6.35	59.7	20.3	91.1	20.58	182.7	35	9120	<LOD	57.8	177		5.9	16	16	550	2.6	26	0.29	0.49	3	0.55	4.4	3.3	0.54	3.2	0.64	4.1	1
C5b-53	JB17-C5b	Core	3443	41	1.32663	96.4	175.7	<LOD	120	<LOD	5.1	901	2.63	0.93	22.1	0.66	3.57	3.86	1.24	21.2	6.99	80.1	31.7	143.9	33	309	52.2	10290	0.62	98.8	274		7	21	17	540	1.2	19	0.33	0.28	1.5	0.18	0.58	0.91	0.23	1.7	0.52	4.8	1.4
C5b-54	JB17-C5b	Rim	3408	40	1.18318	60	174.9	790	560	1310	160	1240	10.5	23.8	196	29.9	275	189	39.9	206	24.6	156	38.9	153	30.9	268	48.4	10380	0.7	178	495		6.4	120	400	530	15	100	1.6	2	14	1.5	21	14	2.2	17	1.9	17	2.8
C5b-56	JB17-C5b	Core	3460	42	0.36775	100.2	153.7	<LOD	113	<LOD	19.1	790	2.87	3.26	48.1	2.5	15.1	9.7	2.15	23.4	6.7	69.4	26.2	115.8	24.7	227.1	41.3	9400	<LOD	85	254.1		6.6	21	16	430	5.1	38	0.43	0.84	9.2	0.74	4.5	2.4	0.46	3.1	0.53	3.6	1.3
C5b-57	JB17-C5b	Core	3445	36	0.235549	90.6	173	87	195	<LOD	270	1532	9	4.9	100	3.2	19.6	16.4	2.93	52.9	14.3	147.5	50.5	218.5	45.4	408	73.8	8650	1.26	189.3	379		5.9	27	20	570	130	34	1.4	2.6	31	1.5	8.7	5.2	0.64	8.1	1.5	5.9	1.7
C5b-58	JB17-C5b	Core	3429	36	2.53655	83.4	191.4	164	102	<LOD	59	1056	7.57	16.6	129	17.8	122	50	19.8	70.3	13.2	113.7	35.8	145.7	31	280.1	47.6	10290	0.93	218	423		6.4	37	17	480	10	52	0.6	3.2	20	3.5	21	7	3	9.1	1.4	5.8	1.3
C5b-59	JB17-C5b	Rim	3333	38	0.99204	72	195.5	362	121.3	1640	52.2	1143	9.08	15.3	184	24.2	154	50	11	63.5	12.3	111.8	37.3	159	34.8	330	59.2	10200	0.99	203	490		9	27	8.8	510	6.8	80	0.96	2.2	24	3.4	18	7.3	2	7.7	1.4	9.5	2.8
C5b-60	JB17-C5b	Core	3436	40	<LOD	101.4	163.9	<LOD	162	<LOD	2.5	597	1.45	<LOD	9.36	<LOD	1.03	2.17	0.677	14.1	4.54	54.7	19.9	91.2	19.8	178.9	33	9580	0.57	67.7	213		7.1	19	18	370	1	37	0.47	0.067	0.83	0.047	0.44	0.51	0.072	2	0.45	2.8	1.3
C5b-61	JB17-C5b	Rim	3223	37	2.6147	60.6	206.2	665	201	2820	135	1830	14.8	47.8	312	38.7	288	167	45.9	199	29.5	209	61.4	241.7	50.5	461	82.3	11970	1.57	413	711		5.3	53	23	540	31	110	1.9	5.1	46	6.3	51	27	6.5	31	3.9	16	3.8
C5b-62	JB17-C5b	Core	3459	38	2.24652	93.1	166.6	295	174	<LOD	69	1038	5.7	22.1	204	25	197	63.9	71	71.8	12.2	104	33.7	142.4	31.1	285	52	9130	0.62	166	309		7.3	39	12	270	13	54	0.75	2.5	27	3.3	25	8.7	11	8.5	1	6.3	1.3
C5b-63	JB17-C5b	Rim	3399	43	2.01062	61	181.4	355	132	1520	73	1360	9.5	22.1	232	28.3	187	90	17.5	107	18.9	148	45.9	178	38	339	59.3	11140	0.74	191	501		9.8	61	11	430	25	180	2.4	5.1	46	5.4	35	24	4	27	4.2	28	7.1
C5b-64	JB17-C5b	Core	3377	42	<LOD	94.1	146.8	<LOD	181	<LOD	10.4	889	2.68	26.2	75.4	8.3	49.5	26.6	7.4	45.6	9.04	85.1	30.6	130.4	27.62	259.5	47.1	9120	0.51	102.3	249.3		5.9	12	22	430	2.5	28	0.5	4.7	9	1.2	7	4	1.2	4.5	0.57	3.1	1.2
C5b-65	JB17-C5b	Core	3347	34	0.0834499	93.9	154.6	72	156.7	<LOD	7.4	835	2.74	4.57	43.4	4.14	37.8	25.6	6.08	48.3	9.04	84.9	28.1	117.3	26.5	234.7	44.1	9730	0.6	94.3	254.5		5.3	20	9.2	790	1.8	35	0.28	0.62	4.1	0.54	5	3.2	0.82	4.9	0.66	4.5	1
C5b-66	JB17-C5b	Core	3453	48	2.22664	82.6	169	428	20500	44000	166	1510	15.4	39.6	368	52	408	256	109	265	34.8	203	50.2	177	36.3	300	55.3	9680	0.38	317	289		12	80	7100	17000	34	140	2.9	8.2	70	11	74	42	20	39	4.7	24	5.1
C5b-67	JB17-C5b	Core	3452	43	1.57628	70.9	179.7	363	107	1160	11.3	2260	6.53	22.4	148	15.7	128	102	22.5	163	32.8	256	72.7	262	49.6	450	71.7	10310	0.77	126	387		5.9	58	18	360	1.3	230	0.67	3.9	16	2.2	11	10	2.5	12	4.2	28	6.7
C5b-69	JB17-C5b	Rim	3177	49	0.573332	63.3	208.3	670	185	3080	21.3	2470	6.7	89	342	40.3	257	137	106	225	38.2	298	86	316	63.8	550	83.9	11070	1.84	428	740		8.6	100	29	890	6.5	300	1.3	20	81	9.1	65	32	23	48	6.1	45	12
C5b-70	JB17-C5b	Core	3339	36	1.01894	76.5	153.6	179	202	990	21.6	1043	4.17	24.5	107	12.4	78	32.1	17.7	52.7	11.21	105.4	35.1	148.9	31.8	288	53.2	9270	0.82	165.7	331		5.5	14	11	280	2.4	32	0.3	3.8	12	2	13	5.7	2.2	5.9	0.67	3.4	1.1
C5b-71	JB17-C5b	Core	3460	35	0.884152	87.3	176.1	<LOD	138	<LOD	19.8	914	3.73	2.38	43.1	2.3	15	10.2	2.94	29.1	7.59	83	31.4	131.4	29	276	48	9460	0.7	123.8	307		8.1	17	28	610	3.6	34	0.6	0.9	8.2	0.98	5.1	3.4	0.77	4.6	0.7	5.5	1
C6-01	JB17-C6	Core	3429	35	0.585807	91.9	147.4	778	226.7	<LOD	82.2451	875.946	2.51425	8.21	73.8	8.1	62.4	35.3	8.71	46.6	10.05	85.3	29.2	125.6	26.49	245	44.8	9220	0.355	148.7	244.9		5.4	23	5.7	280	6.2	27	0.33	0.69	6.4	1.1	6.2	4.1	0.93	2.8	0.4	3.4	1.3
C6-02	JB17-C6	Core	3453	34	0.260014	44.9	154.5	314	141	<LOD	118.16	1188.95	8.07425	12.6	170.7	12.63	85.9	54.3	9.06	80.8	15.2	124.1	37.5	146.4	31.3	278	48.1	10030	0.682	384	623		6	38	5.1	220	9.3	100	0.62	1.3	9.8	0.97	6.7	4.3	0.86	5.4	1.1	8.7	2.8
C6-03	JB17-C6	Core	3447	30	0.0510574	100.6	153.7	111	1730	4800	8.06176	595.946	1.46425	4.21	41.7	2.19	13.8	6.8	1.95	22.1	5.85	60.2	20.73	86	18.28	166.8	30.1	9510	0.531	151.2	272.9		4.1	15	380	1200	0.6	13	0.13	0.98	3.3	0.53	3	1	0.29	1.2	0.2	1.4	0.41
C6-04	JB17-C6	Core	3362	28	0.386999	91.6	202.9	425	147.5	344	89.7318	971.946	4.26425	9.1	159	8.4	47.9	24.6	7.49	47.8	10.97	102.7	33.4	135.4	28.05	246.8	41.25	10050	0.917	370	463		5.1	37	7	95	7.6	20	0.23	1.1	15	1	5.8	2.5	0.78	2.2	0.35	2.1	0.51
C6-05	JB17-C6	Core	3453	30	0.48576	98.8	169.4	163	130.6	<LOD	36.674	774.946	1.90425	2.4	46.7	1.76	11.6	9	2.25	26.7	7.17	74.3	26.5	114.3	24.6	237	41.1	10050	0.58	138.8	267		4.2	19	6.5	150	3.9	37	0.16	0.3	3.7	0.2	1.5	1.1	0.25	2.1	0.43	4	1.2
C6-06	JB17-C6	Rim	3453	29	0.171207	98.5	164.3	81.4	79.6	<LOD	22.7856	687.946	1.88425	2.23	61	2.19	14	9.08	2.22	23.4	6.24	65	23.83	104.5	23.01	219	38.34	9910	0.603	112	258.1		3.7	9.7	5.3	120	2.2	17	0.19	0.26	5.1	0.28	1.3	0.92	0.19	1.2	0.23	2.5	0.62
C6-07	JB17-C6	Core	3284	36	1.08549	55.8	126.1	1366	212	2050	106.116	1358.95	6.27425	52.7	369	37.7	171.3	63.6	20.44	85.4	17.5	144	42.3	162	31.5	283	47.6	8820	0.85	353	408		3.8	60	16	690	5.2	160	0.92	2.5	16	1.7	7.9	3.1	0.93	5.3	1.8	16	4.7
C6-08	JB17-C6	Core	3442	29	<LOD	100.8	130.2	119.7	146.4	<LOD	31.6828	621.946	1.83425	3.28	44.6	5.5	53.3	27.1	9.82	33	6.49	60	20.81	90.5	19.95	187.7	34.32	10040	0.352	96.2	179.1		3	5.9	8.1	110	1.4	15	0.15	0.3	2.2	0.45	4.6	1.5	0.65	1.3	0.24	1.8	0.6
C6-09	JB17-C6	Core	3364	28	1.19907	69	160.6	757	300	740	194.654	1089.95	8.69425	26.5	194.1	25.1	201	108.8	25.38	101.1	15.43	118.7	36.6	146.6	30.91	283.7	49.44	9650	0.696	224	412		5.3	44	13	130	5.6	35	0.58	1.7	9.5	1.3	11	4.4	0.97	4	0.52	3.4	0.9
C6-10	JB17-C6	Core	3461	29	0.978325	90.8	134.9	1180	147.4	<LOD	79.2071	765.946	1.35425	6.4	52.6	5.5	35.4	15.8	6.6	31.2	7.52	73.1	25.1	107.5	22.64	205.9	38	9990	0.373	79.3	200.1		2.6	180	6.2	140	20	34	0.15	1.2	6.3	1.3	8.1	2.6	1.4	2.6	0.38	3.4	1
C6-11	JB17-C6	Core	3428	34	<LOD	101	125.9	260	550	<LOD	30.4893	474.946	1.13425	1.23	24	1.96	18.1	10.3	6.64	17.7	4.27	43.7	15.63	71	15.59	147.5	28.11	9240	0.336	51	146		2.9	150	360	740	4.1	15	0.17	0.37	2.4	0.39	3.1	1.2	0.87	1.6	0.2	1.6	0.38
C6-12	JB17-C6	Core	3138	33	1.46953	71.6	123.6	1940	241	1890	244.131	1097.95	10.8042	62.3	366	40	239	99.9	34.4	101.2	16.5	123.2	36.9	150.1	31.2	294	52	8250	3.49	502	435		3.9	250	13	260	13	76	0.57	3	19	1.8	11	4.2	1.7	5	1.1	7.6	2.5
C6-13	JB17-C6	Core	3403	31	0.696933	88.7	147.9	575	268	<LOD	59.134	819.946	3.95425	45	169	20.1	125.9	53.2	13.34	65.5	11.67	89.8	25.6	104.8	21.43	192.4	36.3	11250	0.429	107.8	261.1		4.1	59	21	160	7	47	0.43	11	16	1.8	8.3	3.1	0.75	5.6	0.96	6	1.2
C6-14	JB17-C6	Core	3370	30	0.20319	95.5	162.9	164	157.5	<LOD	30.9233	968.946	2.71425	3.65	64.5	2.68	15.9	11.21	3.17	32.7	9.24	94.6	32.17	136.7	28.54	256.1	44.9	9230	0.715	194.8	327.4		3.9	11	8.3	170	2.8	20	0.14	0.34	3.2	0.22	1.1	0.71	0.16	1.1	0.23	1.7	0.73
C6-15	JB17-C6	Core	3359	31	0.53355	92	166	803	237	550	152.989	1448.95	5.48425	24.3	184	19.9	111	56.6	12.5	87	17.6	148	46.1	183.3	36.9	323	57	9230	0.912	300	449		7.7	59	11	130	11	110	0.6	3.7	24	3	17	8.6	1.7	11	1.7	11	3
C6-16	JB17-C6	Core	3450	30	0.344426	83.1	159.4	403	154	<LOD	99.7141	663.946	3.24425	13.6	138	15.1	125	64.1	18.7	60.2	9.71	72.9	22.28	88.9	18.18	161.5	29.8	9200	0.636	210	386		3.6	60	12	170	8.2	18	0.29	1.4	11	1.7	14	7.4	2.5	5.6	0.68	2.2	0.52
C6-17	JB17-C6	Rim	3462	30	0.472457	91.3	149.2	485	62.3	3930	32.0083	379.946	1.60425	7.61	61.9	8.01	71.2	23.1	21.6	18.9	2.76	25.39	10.05	54.54	14.43	160.4	37.28	14100	0.52	116.2	765		3	18	5.2	270	1.9	7.6	0.14	0.56	3.4	0.51	4.4	1.5	1.2	1.2	0.15	0.8	0.25
C6-18	JB17-C6	Core	3451	32	0.904053	79.3	172.2	658	126.4	<LOD	171.109	715.946	5.54425	28.21	261.7	22.31	133.7	61.4	18.54	70.6	11.56	84.3	23.98	94.5	19.64	177.3	31.68	11060	0.665	176.7	379		3.6	19	7	190	5.2	14	0.45	0.96	7.7	0.66	5.9	3.4	0.65	2.3	0.4	2.4	0.69
C6-19	JB17-C6	Rim	3450	34	0.0648036	97.7	161.2	30.1	161	<LOD	8.24622	937.946	2.07425	3.02	38.4	1.47	7.7	5.84	2	26.1	8.15	87.8	31.6	137	30.7	290	48.5	10680	0.59	114.2	274		4.7	6.4	27	170	1.1	31	0.19	0.6	3.3	0.26	1.6	0.75	0.19	1.5	0.32	3.4	1.5
C6-20	JB17-C6	Core	3327	33	0.480843	75.7	175.1	627	159	<LOD	89.7318	813.946	4.77425	17.44	155.4	13.05	92.1	49.3	11.18	53.4	9.66	83.7	27.3	113.4	24.67	224	38.5	9620	<LOD	159.2	403.1		3.8	25	5.7	110	2.6	28	0.25	0.53	4.4	0.39	3.6	2.5	0.43	1.8	0.36	3.5	1.1
C6-21	JB17-C6	Core	3360	27	0.462275	88.8	146.3	207	142.4	460	13.335	881.946	2.01425	6.3	50.7	2.73	13.1	7.91	1.77	29.7	8.14	84.2	29.6	127.3	26.97	250.2	43.7	9730	0.485	119.2	246		4.3	20	6.7	140	0.99	39	0.23	1	1.8	0.35	1.6	0.51	0.14	1.3	0.45	3.9	1.3
C6-22	JB17-C6	Core	3306	38	1.07753	63.8	128.1	1428	129.5	1500	72.0459	1068.95	4.47425	73.2	320	48.8	248	78.9	23	71.2	11.76	98.3	32.9	141.7	31.96	306.3	57.6	10370	0.74	358	508		3.5	45	9.5	200	3.5	35	0.31	4.1	16	3.2	14	4	1.5	3	0.47	3.2	0.72
C6-23	JB17-C6	Rim	3457	34	0.229693	97.8	145.4	156	193.5	<LOD	25.6067	1022.95	2.95425	8.71	83.7	7.16	36.8	19.5	6.11	37.9	9.67	98.2	34.01	143.1	30.28	275.7	48.6	9500	0.61	128.1	261.6		4	16	7.2	150	2.2	32	0.27	0.99	5.5	0.73	2.9	1.2	0.54	1.7	0.46	2.1	0.72
C6-24	JB17-C6	Core	3462	33	0.295528	99.4	130.5	<LOD	131	<LOD	3.09233	695.946	1.39425	<LOD	21.7	0.094	1.76	3.07	0.93	17.7	5.6	64	24.1	102.7	22.97	219.7	37.8	10370	0.51	67.4	194.5		3.4	4.4	20	190	0.77	21	0.17	0.044	1.1	0.029	0.13	0.31	0.16	1.1	0.42	4.1	1.4
C6-25	JB17-C6	Core	3424	30	0.0719893	89.4	148.2	481	147	<LOD	86.0427	853.946	3.48425	18.15	165.7	13.27	71.9	32.9	9	40.4	8.58	79.7	27.56	118.2	25.77	238.9	42.28	9710	0.564	143.6	244.1		3.8	56	14	130	3.6	16	0.21	0.91	6.9	0.84	4.6	2.6	0.58	1.9	0.27	1.9	0.56
C6-26	JB17-C6	Core	3445	30	<LOD	98.8	141	248	226	<LOD	46.6562	951.946	1.83425	31.2	91	10.6	39.8	13.1	4.03	33.9	8.47	86.5	28.9	123.3	25.6	240	45.4	9390	0.41	92.6	190		7	83	26	560	13	36	0.57	7.7	18	2.3	5.4	2	0.8	3.2	0.62	6.4	1.8
C6-27	JB17-C6	Rim	3422	35	0.17473	66.2	146.5	486	208	790	114.036	859.946	6.36425	17.7	191	18.6	168	72.3	31.4	82.1	11.94	91.5	27.8	113.1	23.62	222.5	41.6	10260	0.555	113.5	358		3.8	25	15	180	4	25	0.48	1.4	13	1.3	11	3.8	1.7	3.2	0.5	3.1	0.96
C6-28	JB17-C6	Core	3469	27	0.331693	95.3	196.7	320	228	530	30.8148	1950.95	8.19425	12.7	136	6.65	36.6	20.4	4.56	54.4	15.59	168.6	59.3	259.1	56.6	513.7	87.7	9620	3.02	291	419		4	42	15	160	6.2	52	0.39	2.7	23	0.74	4.5	2.5	0.49	2.9	0.5	4.1	1.7
C6-29	JB17-C6	Core	3378	32	1.38085	69.9	144.4	567	157.2	400	41.0141	731.946	2.70425	39	138.1	16.4	81.1	25.2	11.04	36.5	7.67	67.2	22.49	98.1	21.94	211.8	38.3	9900	<LOD	88.1	347		2.5	38	6.6	100	1.7	22	0.15	3.8	8.7	1.2	5.2	1.6	0.57	1.4	0.32	2.2	0.55
C6-30	JB17-C6	Core	3352	29	1.96121	89	157.3	630	233	1240	12.1523	1448.95	2.84425	3.61	30.4	1.8	13	10.97	2.17	40.8	11.79	133	47.2	206	44.4	402	73.9	7500	1.28	241	407		2.3	300	18	160	1.6	110	0.21	0.75	2.8	0.35	1.6	0.51	0.19	2.3	0.69	8.3	3.1
C6-31	JB17-C6	Core	3433	29	<LOD	100	149	188	120.6	<LOD	38.7355	894.946	2.70425	7.5	84.2	6.5	36.2	18.1	5.24	36.3	9.01	86.3	29.66	124.2	27.03	248.2	43.8	10210	0.624	145.7	299		3.8	28	5.9	130	5.5	29	0.22	1.4	8.6	1.1	6	2.7	0.67	2.7	0.49	3.2	0.8
C6-32	JB17-C6	Core	3443	28	0.456552	75.2	123.3	609	248	360	98.7376	975.946	6.15425	37.5	323	31.5	235	100	26.2	96	14.63	109.4	32.9	131	27.35	237.8	41.68	9610	0.614	196	377		4.8	51	14	100	7.3	34	0.55	3.8	35	3.2	23	10	2.9	7.5	0.89	4.2	0.89
C6-33	JB17-C6	Core	3461	34	0.297495	98.2	161.1	218	319	560	88.9723	824.946	2.70425	10.7	93	5.24	28.9	12.6	2.56	30.6	7.87	80.1	28.13	119.1	25.57	235.3	41.6	9540	0.716	140.3	275.4		2.4	26	82	280	5.8	16	0.2	1.9	7.2	0.65	3.5	1.1	0.19	1.2	0.29	2.1	0.58
C6-34	JB17-C6	Core	3446	32	0.327618	99.6	122.8	339	183	<LOD	35.0464	857.946	2.75425	7.26	79.2	5.19	31.4	15.7	5.2	31.7	7.6	79.5	28.6	125.8	26.69	243.7	45.4	9010	0.663	112.6	236.3		2.6	12	12	210	4	26	0.24	0.72	7.2	0.58	3.4	1.7	0.5	1.8	0.41	3	1.1
C6-35	JB17-C6	Rim	3452	28	0.566587	82.4	132.9	647	315	<LOD	116.641	850.946	5.33425	31.41	375	36.7	240.5	88.8	36.9	88.3	13.16	92.6	26.7	105.8	21.54	188.3	34.2	9040	0.64	261.4	279.2		3.2	23	78	240	6.9	41	0.44	0.91	16	1.1	8	2.9	0.66	2.7	0.62	4.5	1.3
C6-36	JB17-C6	Core	3343	28	0.311168	91.4	179.7	165	130.1	<LOD	16.0584	1186.95	3.21425	2.76	60	1.85	12	8.97	3.46	34.4	9.96	106.6	36.4	155	33.2	299	50.2	10500	0.804	239.9	381		5.6	17	7	110	2	99	0.15	0.41	3	0.25	1.5	0.62	0.21	1.6	0.61	7.7	2.3
C6-37	JB17-C6	Rim	3422	32	0.462883	101.3	132.8	153	114.1	<LOD	6.26061	507.946	1.18425	0.135	16.71	0.126	1.38	2.45	0.671	13.54	4.04	45.3	17.22	76.5	16.68	159.3	30.71	9230	0.385	76.5	163.2		3.2	48	6.5	130	0.84	17	0.15	0.025	0.52	0.016	0.2	0.27	0.09	0.87	0.24	2.2	0.63
C6-38	JB17-C6	Core	3449	29	<LOD	99.9	135.2	13.2	183	<LOD	7.16119	542.946	1.04425	0.347	17.6	0.235	1.74	2.96	0.76	13.24	4.32	45.6	17.35	80.4	17.84	169.9	31.4	10050	0.37	62.7	165		3.6	2.3	24	130	1.5	25	0.21	0.045	1.2	0.042	0.33	0.44	0.12	0.9	0.33	2.4	0.89
C6-39	JB17-C6	Rim	3449	31	<LOD	96.6	142.1	28.1	113.3	<LOD	11.5013	667.946	1.73425	1.22	29.2	1.08	6.89	5.26	1.49	19.4	5.62	60.1	21.94	97.8	21.68	196.3	36.44	9360	0.489	84.6	205		3.2	5.3	7.1	150	1.6	17	0.14	0.17	1.5	0.13	0.67	0.46	0.15	1.2	0.22	1.7	0.66
C6-40	JB17-C6	Core	3452	42	<LOD	97.4	103.9	110	106	<LOD	30.1	534	1.49	2.71	37.7	2.1	19.1	14	3.6	29	5.75	56.4	17.4	74.5	14.9	135.6	25	9640	0.287	57.4	128.6		5.4	26	15	400	8.1	26	0.39	0.39	3.2	0.36	2.4	1.9	0.54	2.9	0.43	4.4	1
C6-41	JB17-C6	Core	3428	46	<LOD	88.1	143	225	169	<LOD	18.5	569	1.37	3.48	38.2	3.36	30.7	12.4	3.16	22.6	4.91	48.7	18	81.7	18.15	168	34.5	10870	0.46	51.1	181.4		4.9	60	12	760	2.4	21	0.31	0.44	3	0.64	3.2	1.4	0.44	1.7	0.27	2.9	1.1
C6-42	JB17-C6	Core	3376	34	0.338186	85.7	165.2	83	105	<LOD	9	803	2.59	1.17	42.6	0.74	6.74	6.87	2.27	25.2	7.18	76.5	26.9	114.7	25.4	227	40.3	10290	0.65	225.2	335		6.3	16	11	430	1.7	26	0.41	0.23	1.5	0.14	0.84	0.6	0.28	1.6	0.45	3.1	0.88
C6-43	JB17-C6	Rim	3459	33	0.420255	93.3	130.5	86	118	<LOD	6.8	1038	2.82	3.89	37.2	1.93	12.1	10.8	2.33	32.6	9.62	101.4	34.8	149	31	262	50.3	9030	0.73	123.6	260		5.6	27	19	830	1.6	62	0.64	0.48	3.1	0.18	1.4	1.2	0.24	4.3	0.66	8.2	2.9
C6-44	JB17-C6	Core	3449	34	0.137029	100.6	148.2	30	129	<LOD	3.74	780	1.7	0.63	26	0.87	6.08	4.61	1.34	20.9	6.37	72.1	26.2	118.7	25.6	231.7	41.1	9810	0.62	84.5	209		5.5	11	16	320	0.67	24	0.23	0.18	2.4	0.1	0.57	0.63	0.27	1.3	0.27	3	1.1
C6-45	JB17-C6	Core	3086	41	0.130564	70.6	214.1	146	167	1990	30.6	816	3.29	3.67	76.1	4.24	29.3	15.8	4.11	35.9	8.77	84.4	27.8	112.2	23.9	204.7	35.1	10140	0.91	420	582		6.2	18	31	460	4.2	24	0.34	0.54	4.1	0.58	3.6	1.8	0.55	2.2	0.52	3	1
C6-46	JB17-C6	Core	3427	36	<LOD	89.7	165.8	4660	143	<LOD	42	601	1.39	9.1	25.9	3.51	18.5	10.7	2.4	19.2	4.85	51.1	18.76	87	19.57	179.5	38.27	10770	0.36	59.6	185.7		6.2	610	21	430	5.9	16	0.29	2.7	2.9	0.86	4.6	1.8	0.43	1.6	0.32	2.5	0.92
C6-47	JB17-C6	Rim	3279	40	3.57487	31.3	123.9	4100	370	2010	770	1040	29.4	102	1050	92	550	251	76	228	27.8	148	33.8	112	21.9	197	34.7	11920	24.9	468	1140		5.5	1000	79	500	190	170	6.5	19	220	18	120	54	16	51	5.8	27	5.2
C6-48	JB17-C6	Core	3464	34	0.0923832	100	116.5	<LOD	143	<LOD	2.6	591	1.22	<LOD	16.2	<LOD	0.94	2.37	0.78	15.6	4.85	55.4	20.1	91.9	20.7	197	35.7	10020	0.341	62.8	174		6.1	13	13	190	1.2	34	0.21	0.037	1.5	0.023	0.21	0.41	0.12	1.7	0.5	4.8	1.7
C6-49	JB17-C6	Core	3455	38	0.237167	98.2	132.5	<LOD	154	<LOD	7.5	586	1.3	0.97	23.6	0.77	4.9	4.7	1.36	17.4	5.09	55.6	20.4	89.8	18.61	174.4	32.2	9750	0.4	70.7	171.2		4.5	11	18	360	1.9	30	0.31	0.55	2.6	0.24	1.7	1.4	0.27	2.7	0.52	3.6	1.2
C6-50	JB17-C6	Core	3464	39	0.529418	91	114.3	237	730	<LOD	36.2	880	2.8	7.1	117	6.2	35.2	18	4.89	41.2	9.3	89	28.9	121	25.1	228	41.2	9150	0.46	97	198		8.1	46	380	640	7.8	120	0.58	1.1	26	1.1	5.5	3	0.77	7.2	1.4	13	3.9
C6-51	JB17-C6	Core	3443	36	0.480309	98.2	135.9	239	191	<LOD	35.6	897	1.61	6.39	68.1	5.28	36.9	14.3	7.49	36.5	8.79	88.1	30.2	129.4	27.3	247	45.6	8200	0.269	103.9	195		4	27	16	350	6.9	47	0.24	0.64	9.9	0.5	4	1.5	0.74	3.1	0.74	5	1.5
C6-52	JB17-C6	Core	3467	35	0.376092	99.1	127.6	150	174	<LOD	22.6	759	2.2	7.14	63.2	5.03	30.5	16.6	6.33	31.1	7.04	71.4	25.23	109.4	24.29	215.5	40.04	9490	0.44	77.9	194.3		3.9	22	17	610	3.1	27	0.37	0.39	6.7	0.48	2.6	3.3	0.71	2.4	0.27	2.3	0.88
C6-53	JB17-C6	Core	3343	35	0.227437	88.5	120.2	1100	155	<LOD	55.6	492	3.27	6.31	65.4	7.21	49.1	17.4	5.16	26	5.1	49.3	16.5	71.6	14.9	132.4	24.9	10240	0.73	95.9	231		5.2	100	30	420	7.3	33	0.43	0.56	5.8	0.67	5.4	1.6	0.58	1.8	0.33	3.8	1.3
C6-54	JB17-C6	Core	3469	34	0.29089	99.3	137	60	121.1	<LOD	4.4	742	1.34	0.58	20.5	0.263	2.3	3.31	0.88	17.7	5.65	66.7	24.5	103.9	23.4	214	40.4	9990	0.41	73.1	190		10	19	9.9	390	1.4	64	0.23	0.17	2.2	0.068	0.46	0.42	0.13	1.7	0.49	5.8	2.1
C6-55	JB17-C6	Rim	3466	34	0.406698	68.4	129.4	831	203	<LOD	182	1328	10.1	31.5	449	30.2	163	87.4	19.1	132	25.8	178	44	155.4	30.3	251	43.6	9110	0.53	221	318		8.3	79	19	640	24	70	1.2	2.3	38	2.2	11	8.7	1.3	11	1.9	10	2.6
C6-56	JB17-C6	Core	3431	50	<LOD	89.9	146	264	97	<LOD	25.7	731	2.05	6.7	65.8	6.19	45.6	21.2	9.55	29.3	6.92	69.8	24.5	108.5	23.7	223	39	11160	0.53	102.7	220		5.5	30	15	540	2.6	27	0.26	1.1	4.6	0.66	3.3	2.2	0.92	2.3	0.43	3.1	1.1
C6-57	JB17-C6	Rim	3368	35	<LOD	88.5	198.4	112	175	<LOD	16	1066	4.38	4.6	78	3.4	24.2	13.7	3.62	39.6	10.68	105.2	36.8	151	32.3	287	49.4	10560	0.9	254	386		9.2	29	21	320	3.4	71	0.4	1.7	14	1.2	7.2	3	0.79	1.9	0.66	6.4	2.7
C6-58	JB17-C6	Core	3462	36	0.158312	100.3	137	<LOD	160	<LOD	6.6	673	1.35	0.399	22.1	0.421	2.87	4.41	1.04	18.4	5.66	63.2	22.45	100	21.89	199.8	37.7	9500	0.348	74.9	188.1		4.1	14	14	310	1.5	28	0.16	0.087	1.3	0.089	0.44	0.35	0.11	1.2	0.36	2.8	0.92
C6-59	JB17-C6	Rim	3458	34	1.2029	90.7	131	820	98	<LOD	52	618	3.54	9.3	108	11.4	113	42	27	40.5	6.7	59.5	20.1	84	19.3	183	33.2	10910	0.48	87	202		10	230	17	290	14	82	0.67	3.3	29	3.6	32	11	6.6	8.8	1.2	9.5	3
C6-60	JB17-C6	Core	3338	42	1.21544	65.8	136.7	4400	155	6600	114	467	2.06	24.1	148	22.2	168	47.2	18.3	43.2	6.36	49.5	15.3	66	15.1	145	28.2	9960	0.29	82	226		5.6	1600	14	2700	26	61	0.34	2.4	19	3.4	27	7.1	3.1	4.6	0.5	6.2	2.6
D1a-01	JB17-D1a	Core	3051	30	0.624402	75.1	127.1	1081	146.8	5860	11.5013	1491.95	6.67425	94.9	170	24.1	131	51.6	52.9	80.9	16.44	146.2	50	210.3	43.9	393	73.9	11980	2.24	216	801		6	85	7.2	400	1.3	40	0.51	7.7	12	2.1	10	3.6	5.6	4.7	0.74	5	1.6
D1a-02	JB17-D1a	Core	3437	32	<LOD	97.7	173.9	16.3	217	1220	3.45039	1167.95	3.08425	1.9	29.1	1.09	7.8	8.5	1.96	33.7	10.14	108.9	38.3	164.5	35.6	314.8	55.1	11340	0.91	142.5	367		5.5	7.4	29	370	0.47	49	0.22	0.67	2.6	0.37	2.4	1.6	0.26	2.5	0.43	3.6	1.4
D1a-03	JB17-D1a	Core	3356	29	0.256858	91.3	161.2	85	176.5	450	12.8033	1157.95	2.88425	1.9	33.9	0.93	6.5	6.97	2.24	31.8	9.64	105.2	38.8	165.7	34.51	306.2	57.4	10780	0.834	195.7	375		2.1	16	6	100	1.3	26	0.19	0.24	1.4	0.15	0.82	0.42	0.17	1	0.26	2.9	1
D1a-04	JB17-D1a	Core	3312	30	0.0657672	90.3	165.3	130.3	194.6	960	7.10694	798.946	2.42425	3.3	44.7	1.81	10.7	8.21	2.11	24.94	7.2	76.8	27.58	118	25.11	228	40.03	9740	0.659	121.7	324.6		2.8	8.8	7.6	180	0.63	19	0.17	0.34	5.9	0.24	1.3	0.69	0.16	0.86	0.23	1.7	0.47
D1a-05	JB17-D1a	Core	3438	29	<LOD	99.9	139.9	26.7	107.6	<LOD	2.79937	633.946	1.65425	0.71	22	0.323	3.8	6.5	1.51	18.3	5.2	55.9	20.9	95.8	21.6	209.1	36	10730	0.608	54.1	193		2.8	7.2	6.7	79	0.5	31	0.23	0.41	5.3	0.091	1.1	1.8	0.62	2.3	0.41	3.2	1.1
D1a-06	JB17-D1a	Core	3450	32	<LOD	99.8	140	<LOD	146.7	<LOD	4.99431	697.23	1.46784	0.56	22.1	0.74	5.2	4.38	1.3	18.3	5.69	63.5	23.16	103.4	22.76	211.2	37.9	10070	0.473	76.5	205.4		5.6	10.5	14.2	237	1.16	38	0.22	0.27	2.4	0.21	1.5	0.84	0.3	1.6	0.42	3.9	1.35
D1a-07	JB17-D1a	Core	3247	34	0.518158	72.4	119.3	198.8	1930	6500	9.33124	1553.95	6.13425	18.55	128.9	19.01	144.4	69.9	21.45	97.8	18.11	158.6	52.2	214.3	42.7	374.6	63	9480	1.22	174.7	453		2.9	9.3	200	770	0.79	45	0.36	0.62	5.6	0.91	6.5	2.5	0.93	3.7	0.62	4.1	1.4
D1a-08	JB17-D1a	Core	3349	30	0.470457	94.1	142.9	93	1360	4300	10.0799	957.946	3.44425	10.3	61.6	7.5	65.4	42.2	16.8	63.9	11.09	94.8	31.94	131.2	27.68	247.2	44.6	9550	0.95	142.4	339		2.3	8.6	580	2000	0.77	27	0.27	1.1	6.2	1	8.7	5.7	2.3	7.6	0.9	4.2	0.71
D1a-09	JB17-D1a	Core	3422	43	0.382221	92.9	138.9	80.2	3300	9200	6.07616	702.946	2.11425	14	73.1	11.65	81.7	30.9	19.02	47.2	8.48	72.8	23.98	98.5	21.54	198.6	35.9	9610	0.68	75.2	213.1		3.7	3.5	1300	3800	0.73	22	0.25	1	2.5	0.57	4.7	1.5	0.74	2.4	0.42	2.5	0.75
D1a-10	JB17-D1a	Core	3429	31	0.423976	82.2	146.5	115.8	125.9	380	12.3693	872.946	4.99425	16.9	81.3	12.5	76.8	57.4	9.97	80.9	14.62	106.3	31.04	119.3	24.91	229	41.2	10560	0.669	108.5	301		4.6	8.8	5.7	100	1.2	24	0.36	1.5	7	1.1	7.4	5.7	0.82	6.4	0.88	4	0.83
D1a-11	JB17-D1a	Core	3442	33	0.819921	87.2	179.4	125	197.3	560	11.8268	1052.95	4.03425	12.7	65	9.4	68	38.5	26.7	62.3	12.5	106.7	34.8	148.4	30.2	269	50.5	11020	0.62	109.9	371		6.3	18	8.3	240	1.7	50	0.56	2	10	1.6	13	6.4	5.7	7.9	1.3	7.8	1.8
D1a-12	JB17-D1a	Core	3432	30	0.0703435	93.8	126.8	80	131.4	<LOD	22.3516	1250.95	4.87425	21	80.7	10.3	54.7	49.5	9.7	84	17.5	129.9	40.7	171.4	36.18	329.5	60.1	9210	0.615	111.8	275.3		2.6	12	6.3	150	2.4	46	0.44	3	7.7	1.9	7.2	7.1	1.4	9.3	1.6	6.5	1.2
D1a-13	JB17-D1a	Core	3390	30	0.102559	94.6	147	30.4	4300	9100	5.30579	926.946	1.24425	2.75	20.9	1.45	9.2	8	2.49	29	7.77	83.9	30.2	134	29.8	276	51.9	9790	0.682	99	267		4.6	4.2	660	2200	0.59	90	0.18	0.48	1.8	0.28	1.6	1.1	0.41	3.4	0.83	7.9	3
D1a-14	JB17-D1a	Rim	3409	32	1.143	72.9	153.8	227	164.4	690	13.8884	945.946	4.60425	19.1	86.3	13.05	75.4	49.5	14.72	75.7	13.78	107.6	32.03	131.6	26.77	239.6	43.9	9990	0.685	114.7	384		6.1	19	9.1	180	1.4	22	0.34	1.3	5.4	0.81	3.8	3.1	0.92	2.2	0.38	3.7	0.74
D1a-16	JB17-D1a	Core	3456	33	0.390876	98.6	91.8	263	71.9	1310	6.72718	331.946	2.02425	13.3	75	9.7	57	22.6	14.7	26.1	3.96	27.1	9.58	51.7	14.28	170.3	43.7	13000	0.99	26	522		4.1	36	7	470	1.2	20	0.29	1.7	9.8	1.3	6.5	1.7	1.9	2.6	0.41	2.7	0.78
D1a-17	JB17-D1a	Core	3255	39	1.0187	70.2	151.6	593	183	1880	17.1434	1190.95	6.82425	38.3	160	25.8	216	98	69.4	112	17.6	132.9	39.2	157.7	32.75	302.4	56.2	11720	1.15	183.2	481		2.2	51	19	300	1.3	34	0.5	2.8	14	3	21	10	4.2	10	1.2	6.7	1.6
D1a-18	JB17-D1a	Core	3422	31	0.340687	82.8	142.7	167.6	173.3	1390	13.8884	863.946	3.63425	15.83	91.4	16.11	132.1	67.2	21.03	82.5	12.68	90.6	28.47	116.6	24.06	223.7	42.2	10130	0.456	82.5	293.2		4.1	8.8	6.5	260	1.2	21	0.33	0.59	3.3	0.58	5	4	0.78	3.1	0.47	2.5	0.65
D1a-19	JB17-D1a	Core	3354	32	0.282159	85.1	158.9	68.9	153.5	<LOD	5.6964	922.946	2.10425	6.32	37.1	3.97	26.3	16.7	4.64	38.1	9.1	89.5	31.1	131.6	27.6	244	44.8	10160	0.74	119.7	347		2.3	9.1	6.9	170	0.59	54	0.31	0.91	2.8	0.59	4.2	2.1	0.68	2.6	0.49	5.1	2
D1a-21	JB17-D1a	Core	3442	28	0.724041	99	113.1	109	128.4	<LOD	9.26614	829.946	3.92425	18	117	15.1	108	46.4	27.5	64.8	11.47	91.2	27.72	111.4	22.26	204.2	36.5	9040	0.35	122.5	229.8		3.8	10	5.6	83	0.86	25	0.44	2	11	1.6	9.9	3.7	1.9	3.3	0.64	3.1	0.99
D1a-22	JB17-D1a	Rim	3187	33	2.76772	59.7	143.5	2433	376	8750	22677.1	2278.95	41.6642	56.7	312	54.6	456	297	56.3	392	53.9	325	73.9	231.1	40.5	329	53.9	8170	2.39	915	824		3	67	19	460	1200	120	2	2.9	17	2.5	25	15	2.4	19	2.2	13	3
D1a-23	JB17-D1a	Core	3387	31	0.666053	87.9	153.7	412	233	<LOD	7.26969	1184.95	3.41425	14.93	72.3	9.21	76	42.8	21.23	67.2	13.97	121.9	39.99	167.3	34.12	308.4	54.1	9210	0.652	151.3	392		3.1	24	10	180	1.1	33	0.28	0.53	3.4	0.49	3.1	2.3	0.8	1.7	0.37	3.2	0.89
D1a-24	JB17-D1a	Core	3406	29	0.555169	96.8	139.2	92	130.9	<LOD	5.13218	941.946	2.29425	14.5	60	6.38	42.6	33.4	6.73	58.8	11.84	97.1	31.21	128.1	26.85	246.4	44.26	9060	0.615	143.3	274.5		5.1	13	8.4	120	0.55	33	0.2	2.6	6.5	0.74	5.1	3.9	0.75	5	0.72	3.9	0.83
D1a-25	JB17-D1a	Core	3455	37	1.82728	63.2	145.8	687	133	1670	58.8085	2543.95	19.9642	84.8	480	76.8	534	385	76.8	527	71.7	384	80.4	245.2	43.89	356.1	60	9100	1.07	262.8	610		4.8	32	11	280	2	68	1.4	3	22	3.1	18	18	3.5	26	3.3	16	2.6
D1a-26	JB17-D1a	Core	3295	40	1.0722	49.1	170	278	185	1290	36.457	1618.95	11.6643	33.7	170	19.8	114	71.8	20.5	120	23.2	180	55	210	41.4	346	63.2	10930	<LOD	179	614		11	24	11	290	5	100	1.2	3.6	17	2.3	13	8.1	2	13	2.2	15	3.7
D1a-27	JB17-D1a	Core	3234	31	0.185338	82.3	127.5	92	1590	5030	8.05091	678.946	1.79425	6.18	46.5	5.23	39.9	21.6	8.13	36.8	7.51	65.7	21.95	94.2	20.82	194.1	35.66	9390	<LOD	118.8	238.2		2.1	12	180	590	0.65	11	0.15	0.33	1.4	0.32	2.4	1.2	0.67	1.1	0.26	1.9	0.56
D1a-28	JB17-D1a	Rim	3251	31	0.786284	80.3	160.5	1870	169	1140	72.5884	769.946	2.75425	27.3	135	20.1	139	85	22.4	107	14.7	96.9	25.7	100.4	20.3	184.4	36	10020	0.47	61.1	301		6.4	290	14	280	8.7	48	0.41	3.6	20	3	16	12	3.3	14	1.6	7.5	1.7
D1a-29	JB17-D1a	Core	3116	46	2.39161	54.8	195	881	136	1840	43.8351	1498.95	12.6643	79	324	62.3	437	230	62.8	290	41.6	223	52.1	169	32	269	54.7	10180	0.72	143	587		13	88	26	460	4.9	100	1.4	11	16	4.5	24	15	3.9	27	2.7	20	3.6
D1a-30	JB17-D1a	Core	3401	28	0.529682	87.4	170	115	192	<LOD	5.7398	978.946	1.61425	10.5	55.3	6.5	38.4	22.3	6.11	40.6	9.45	95.6	32.4	137	29.9	276	49.8	10760	0.62	108	349		6.8	10	13	220	0.96	94	0.28	1.6	4.9	0.71	2.7	1.5	0.47	2.7	0.96	9.7	3.2
D1a-31	JB17-D1a	Rim	3348	30	0.187458	91.1	167.8	102	163	470	7.12864	1232.95	3.74425	10.4	55.2	6.8	41.9	27.7	4.72	55.3	12.85	120.4	39.59	163.1	34.8	309.9	51.59	10130	1.008	187.9	415		3.6	22	6.5	140	0.72	38	0.33	2.2	8.1	1.7	9.9	6.5	0.9	7.7	0.95	5.3	0.99
D1a-32	JB17-D1a	Core	3445	36	4.9182	42.7	149.7	1506	179	5080	77.1455	2221.95	51.7642	122.4	686	117.7	846	321	298	340	44.8	276.3	71	255.4	49.3	425.1	72.7	10910	2.06	395	838		7.3	97	15	470	3.3	56	2.3	6.8	36	7.5	51	19	17	18	2.1	9.4	2.1
D1a-33	JB17-D1a	Core	3236	38	0.754368	71.9	159.8	510	149	1840	6.60782	1086.95	2.19425	6.6	38	4.8	26.4	12.2	8.6	34.3	10.1	102	36.7	159	33.97	306.1	57.9	12430	1.38	122.4	478		3.7	40	8.8	360	0.96	32	0.23	1.5	5.1	1.1	5	1.4	1.2	1.4	0.49	3.7	1.5
D1a-34	JB17-D1a	Core	3444	33	0.830281	93.5	164.8	117.9	172	760	19.7475	1124.95	4.56425	16.11	75.6	10.21	64.6	43.8	11.55	72.2	15.08	121.4	38.4	158.7	33	299	52.6	10740	0.75	127.5	344		4.8	6.4	12	170	2.6	21	0.37	0.79	2.7	0.4	3.8	2.4	0.52	3.9	0.85	5.9	1.4
D1a-35	JB17-D1a	Core	3368	32	0.965225	85.9	144.4	1010	144	<LOD	15.6244	774.646	3.52425	17	102.2	12.27	73.8	37	10.89	54.5	10.33	82	26.35	108.7	22.65	209.4	40.05	8850	0.541	125.3	310.7		3.9	360	12	230	1.5	8.3	0.35	1.3	6.3	0.88	4.7	2.9	0.74	3.2	0.49	2.5	0.51
D1a-36	JB17-D1a	Core	3238	34	0.749737	77.5	165.2	187	140.1	960	14.6479	1244.95	8.02425	24	137	19.1	114	70.8	26.7	106.7	19.7	143.5	41.7	155.5	31.6	273.5	45.67	10460	1.24	292	523		7.6	20	7.2	130	1.6	44	0.57	2.5	12	2.3	13	7.9	2.7	8	1.2	4.8	1.1
D1a-37	JB17-D1a	Rim	3387	33	0.158033	98.1	124.2	27.5	177.1	<LOD	4.22076	654.946	1.17592	<LOD	15	0.1	1.4	2.8	0.81	15.5	4.96	57	21.74	97.8	21.94	211.6	40.1	9530	0.49	76.3	170		2.8	10.7	14.2	136	0.6	20.7	0.15	0.04	0.7	0.02	0.2	0.3	0.1	0.8	0.24	2.6	0.9
D1a-38	JB17-D1a	Core	3448	68	0.694948	97.2	173	14.5	176	<LOD	5.15388	1028.95	2.13425	0.26	18.25	0.157	2.3	4.17	1.16	24.9	8.34	93.2	33.4	146.8	32.4	294	48.6	10660	0.69	129.1	353		7.9	6.1	12	120	0.63	71	0.19	0.19	0.86	0.094	1.5	0.66	0.21	1.2	0.48	5.6	1.8
D1a-39	JB17-D1a	Core	3297	41	1.21942	71.8	132.8	202	110.8	870	9.20104	938.946	5.75425	34.9	125.8	18	99.1	62.9	15	84.2	15.4	106.9	31.7	124.1	25.2	221.6	38.5	10130	1.31	243	468		4	19	6.8	290	0.98	55	0.52	2.9	9.3	1.4	8.8	6.9	0.78	6.9	1.1	4.4	1.4
D1a-40	JB17-D1a	Rim	3201	32	0.294536	74	151.9	217	116.1	970	5.44684	773.946	2.87425	12.5	62.5	10.14	82.4	54.8	19.4	66.9	10.58	80.3	25.7	110	23.9	230	43.8	11350	1.02	79	441		3.1	11	7.6	230	0.71	42	0.42	1	2.9	0.81	4.1	3.1	2	3.2	0.43	3.9	1.7
D1a-41	JB17-D1a	Core	3304	31	1.44008	62.7	147.2	449	150	2190	43.1841	1096.95	4.40425	51	180	23.5	128	66.5	29.4	91.7	16.26	122.8	37.2	147.4	30.34	269.1	48.8	10780	2.46	154.6	440		5.1	40	13	290	2.9	33	0.29	6.4	17	3	16	6.2	2.7	6.6	0.76	4.5	1
D1a-42	JB17-D1a	Core	3412	38	6.07583	58.5	147.6	1044	180	3050	38.9525	1722.95	7.93425	130.5	524	84.6	529	308	140.5	363	52.2	271	60.3	194.7	35.5	306.4	56.22	10970	1.07	378	666		5.6	34	15	530	2.8	81	0.66	7.7	22	3.3	36	13	5.8	23	2.4	14	2.3
D1a-43	JB17-D1a	Core	3422	30	0.447156	63.9	142.7	199	207	790	17.5775	908.946	5.98425	23.6	140	20.4	128	52.2	12.8	69.4	12.03	95.7	30.5	126.8	26.38	241.8	47.5	10650	0.594	124	347		2.2	28	25	200	2	30	0.6	3.2	14	2.2	13	5.4	1.3	5.8	0.73	4.3	1.1
D1a-44	JB17-D1a	Core	3096	55	1.79828	57.9	142.2	794	99	4110	5.8	1114	5.33	41	109.7	10.9	61.9	23.9	26.7	46.3	10.78	116.1	40	164.7	34.9	311	52.9	12410	2.18	323	778		7.1	28	12	510	1.6	47	0.33	8.1	9.4	0.95	4.9	2.1	3	2.7	0.46	5.4	1.3
D1a-45	JB17-D1a	Core	3171	46	1.74603	56.5	150.7	293	126.3	2720	26.7	1204	14.3	13.7	92	10.1	64	38.2	11.4	74	15.6	139.2	42.9	167.6	34.4	299.7	51.3	10800	1.59	321.9	621		5.7	21	9.4	450	8.2	42	1.6	3.3	17	2.4	15	9.7	2.3	12	1.8	9.5	1.6
D1a-46	JB17-D1a	Core	3334	50	4.38612	35.9	134.1	1190	223	3860	57	1960	22.6	87	455	74	487	339	97.5	420	59	344	73	225	44.3	399	67.8	12030	1.79	259	950		6.5	150	22	780	13	280	4.4	16	75	13	81	61	8.9	85	11	60	12
D1a-48	JB17-D1a	Core	3201	54	2.34435	48.6	162	2750	258	3100	78	1890	15.6	215	893	133	1049	451	376	480	52.1	298	69.8	222	45.1	404	71.9	12750	0.93	310	853		11	200	76	1000	10	160	2.4	31	66	12	89	41	40	89	6.2	29	7.7
D1a-49	JB17-D1a	Core	3389	35	0.370016	81.8	157.7	99	165	<LOD	6.4	1301	4.71	9.4	51.5	4.7	29.7	21.2	4.46	51.8	13.21	132.2	45.9	189.3	41.4	364	61.7	10080	1.34	153	406		6.9	12	17	280	1.1	48	0.4	1.5	4.8	0.84	4.4	3.8	0.64	6.1	0.91	6.1	2.4
D1a-50	JB17-D1a	Core	3328	44	0.459722	86.2	173.6	263	152	<LOD	5.2	984	2.99	2.46	30.8	1.99	13.9	9	5.58	30.2	8.49	94.4	34.1	141.9	31.7	292	48.8	10230	0.82	191	398		4.4	18	18	560	1.1	46	0.56	0.86	3.4	0.63	3.9	1.4	0.7	2.5	0.5	4.9	1.7
D1a-51	JB17-D1a	Core	3284	44	0.445066	87.4	140.7	51	4300	11100	5.8	625	1.87	2.84	21.4	1.59	11.3	8.8	2.74	24.3	6.32	62.6	21.2	88.7	19.7	182	34.5	10040	0.83	125	295		7	12	2100	5400	1.1	50	0.34	0.81	1.6	0.52	3.8	2.3	0.53	3.1	0.65	6	1.8
D2a-01	JB17-D2a	Core	2828	32	0.140187	69.5	139.2	515	226.8	4240	2.54982	1246.95	6.18425	1.07	5.18	0.329	1.9	2.21	1.87	13.99	6.13	87.5	37.1	169.9	40	403	76.6	11790	31	89	1079		2.8	29	9.5	330	0.36	70	0.26	0.21	0.58	0.072	0.34	0.24	0.14	0.7	0.28	3.8	1.4
D2a-02	JB17-D2a	Rim	2672	33	0.241521	64.8	115.1	649	3391	16840	3.8193	1933.95	8.70425	7.09	27.3	3.16	16.84	8.52	8	27.7	9.84	129.6	53.5	249	58.7	563	103.5	10510	12.39	165.3	1128		2.5	71	90	620	0.67	81	0.54	0.4	1.1	0.17	0.8	0.56	1.8	1.3	0.33	6.8	2.7
D2a-03	JB17-D2a	Rim	3134	33	0.375538	75.3	41.6	6320	3660	13860	74.3244	11908.9	50.1642	199	1100	92.7	456	270	110.5	665	187	1470	344	1091	181.9	1491	220.6	9010	27.8	705	3680		1.5	360	100	530	7.8	720	4.6	13	130	6.6	35	20	7.4	44	11	95	18
D2a-04	JB17-D2a	Core	3425	33	0.448694	82	162.5	102.4	480	3040	4.95858	2208.95	2.66425	0.65	10.99	0.423	5.17	8.69	2.98	48.4	15.6	175	64.9	284	63.2	585	105	8000	1.633	317	736		3.6	8.6	110	260	0.67	110	0.18	0.2	0.34	0.07	0.43	0.74	0.27	3.2	1.1	10	3.4
D2a-05	JB17-D2a	Core	3415	27	<LOD	99.2	137.3	66.2	123	<LOD	13.3458	940.946	3.79425	10.4	61.9	7.93	56.4	45.8	7.69	73.2	12.91	103.6	30.86	127.7	26.65	243	44.9	9480	0.528	110.3	288		4.3	9.3	11	190	1.3	33	0.42	0.94	3.5	0.59	2.6	4.1	0.59	2.4	0.63	4.1	0.53
D2a-06	JB17-D2a	Core	3245	30	0.196571	91.5	150.8	42.8	128.6	<LOD	7.92071	878.946	2.95425	1.62	23.98	0.862	6.14	6.74	1.299	25.09	7.57	82	29.33	127.8	26.52	242.1	43.56	9810	0.95	137.9	363		4.3	3.6	7.8	130	0.56	16	0.16	0.14	0.55	0.083	0.57	0.39	0.072	0.98	0.21	2.3	0.61
D2a-07	JB17-D2a	Core	3220	36	0.475575	65.4	200	261	399	2160	13.5629	1732.95	4.93425	7.6	28.8	2.22	13.4	7.13	3.15	31.3	10.61	135.2	53.4	258	59.1	555	120.2	10540	2.8	175.6	595		11	27	22	460	1.6	71	0.57	1.6	2.4	0.29	1.9	0.84	0.48	2.8	0.66	8	2.4
D2a-08	JB17-D2a	Core	3420	36	<LOD	98.4	169.8	44	123	<LOD	4.42514	769.946	2.01425	0.53	21.4	0.261	2.27	3.69	1.27	21.7	6.71	74.6	26.6	115.9	26.1	252	44	10740	0.67	125.3	297		8.3	11	12	150	1	43	0.23	0.16	1.8	0.091	0.81	0.62	0.26	2.4	0.61	5.7	1.8
D2a-09	JB17-D2a	Rim	3001	29	0.41716	65.8	155.7	260	2140	7340	9.78696	1156.95	6.04425	36.9	140	14.2	82.7	45.7	12.26	79.4	16.1	139.1	41.57	157	30.18	252.8	42.5	10140	1.62	611	838		4.2	16	380	750	0.71	30	0.33	3.2	10	1.3	7.3	2.8	0.88	4.2	0.65	3.9	0.96
D2a-10	JB17-D2a	Rim	3268	31	3.30975	44.5	160.7	2910	491	6470	45.2457	2958.95	9.19425	47.7	171.9	21.3	109.6	54.9	24	122.7	31.6	279.6	87	352	71.7	640	127.7	8740	5.08	225	820		5.5	160	36	630	7	120	0.62	2.5	9.9	1.5	5.9	3.7	1.7	5.4	1.3	8.6	1.8
D2a-11	JB17-D2a	Core	3424	45	0.278918	93.9	129.7	161	134	<LOD	9.54825	1008.95	3.94425	32.1	149	23.1	168	87.7	32.7	115.7	17.7	119.9	33.6	136	27.4	236	44.6	9250	0.62	138	254		3.1	14	10	280	1.6	57	0.62	2.6	12	1.6	13	6.7	2.2	7.2	1.4	7.9	2
D2a-12	JB17-D2a	Core	3416	42	0.209084	93	174.7	98	130	<LOD	9.76525	1026.95	3.73425	8	50.8	4.02	27.1	20.1	4.07	45.7	10.38	99	34.1	148.2	32.7	301	52.9	10950	0.81	138.9	359		5.2	16	12	190	1.5	68	0.49	1.2	3.8	0.44	3.7	2	0.29	3.5	0.49	5	1.4
D2a-13	JB17-D2a	Core	3097	43	1.04274	43.6	161.7	859	539	2750	33.0934	3408.95	16.7643	21.2	94.5	9.69	52	38.3	6.78	111.2	34.8	317	95	341.5	67.5	585	112.6	9810	6.25	192.3	947		5.6	39	19	280	1.8	180	1	1.7	4.5	0.73	4.5	3.1	0.62	6.9	1.9	16	4.9
D2a-14	JB17-D2a	Core	3186	41	0.73929	60.9	155.1	241	152	1250	6.83568	800.946	2.63425	8.59	42.1	5.2	32.6	19.8	15.6	37.8	7.85	77.3	26.2	115.6	25	241	48.4	12160	0.72	89.1	424		6	34	10	260	1.3	38	0.28	0.53	1.9	0.34	1.4	1.3	2.2	1.7	0.35	4.5	1.4
D2a-15	JB17-D2a	Core	3358	33	<LOD	91	199	25.5	190.4	<LOD	2.82107	1349.95	3.19425	0.97	25.8	0.367	2.95	4.99	1.94	31.8	10.76	116.8	44.4	187.2	39.8	359	60.9	12420	1.08	161.5	496		6	4.2	8.7	240	0.97	62	0.38	0.2	1.4	0.085	0.77	0.52	0.22	2	0.48	4.8	1.5
D2a-16	JB17-D2a	Rim	3278	33	0.405427	55.5	163.9	265	126.6	1230	19.856	1288.95	7.15425	40.2	142.7	17.4	97	57.8	20	93.6	18	138	44.4	175	35.3	304	57.5	12210	1.11	192	541		6	12	7.7	250	2.2	110	0.9	2.3	9.5	1.3	6.2	5.7	1.1	9.2	1.8	16	4.4
D2a-17	JB17-D2a	Core	3242	31	<LOD	81.7	167.6	297	560	3510	6.08701	2384.95	4.32425	3.2	19.9	1.51	8.8	8.18	3.03	38.4	13.82	172.2	69.1	311.6	70.3	665	125.1	10110	2.63	192.1	704		7.3	20	160	520	0.46	47	0.29	0.44	2	0.25	1	0.59	0.27	1.2	0.41	4.5	1.5
D2a-18	JB17-D2a	Rim	3456	30	0.149836	75.9	137.2	73	126	<LOD	4.73072	732.946	1.74425	14.3	67	6.8	43	24.9	7.9	42.7	7.93	70.6	23.1	102.8	22.1	199	40.5	9960	0.317	76.1	219		5.3	18	13	200	0.83	62	0.4	4.2	16	1.8	10	4.8	1.6	6.7	0.91	7.5	1.9
D2a-20	JB17-D2a	Core	3458	42	0.210612	93.4	106.5	26.9	347	<LOD	7.02138	2808.95	2.46092	0.35	17.56	0.66	8.71	14.97	4.43	78.7	24.84	269.3	93.4	368	74.5	636.3	108.1	9080	1.155	192.2	280		3.4	9.4	17	137	0.73	129	0.18	0.09	0.65	0.11	0.82	0.9	0.29	3.4	1.2	12.4	4.4
D2a-21	JB17-D2a	Rim	3421	33	0.763512	65.9	164.7	314	152	<LOD	16.9264	904.946	4.21425	32.7	164	24.9	156	65.4	49.8	82	12.21	98	30.6	125.6	25.94	234.9	45.17	11380	0.97	103.7	378		4	23	13	280	2.1	38	0.33	2.8	10	1.7	11	5.2	2.2	5.1	0.56	3.9	1.1
D2a-23	JB17-D2a	Rim	3294	32	0.575782	85.4	194.4	306	472	1550	5.43599	1478.95	3.48425	8.83	52.6	4.8	25.3	13.08	3.67	42.9	12.58	134.2	46.7	195	41.3	372	68.5	9710	2.27	247	440		5.8	34	34	230	0.62	110	0.26	0.55	2.3	0.33	1.5	0.86	0.24	3.2	0.88	9.2	2.9
D2a-24	JB17-D2a	Core	3191	36	0.569654	73.8	209.8	1741	299	2270	29.4043	3278.95	13.2643	15.7	109	12.02	80.6	69.3	20.5	225	45.3	311	80.6	300	60.8	568	111.9	11160	4.96	176	671		6.2	69	19	610	2.9	270	1.6	1.5	11	0.96	8.1	8.3	3.7	25	5.3	28	6.1
D2a-25	JB17-D2a	Rim	3106	34	1.79382	69.2	171.3	819	564	5580	3.9495	2978.95	6.34425	7.8	23.1	2.44	12	9.93	2.32	49.1	17.8	219	82.7	377	85.3	811	147.8	10650	3.75	333	1079		5	93	35	780	0.87	200	0.56	0.7	1.4	0.34	1.6	0.91	0.18	3.2	1.5	17	5.4
D2a-26	JB17-D2a	Core	3280	31	0.188636	73.7	207.9	273	447	1000	18.12	2417.95	6.58425	5.94	30	2.56	15.4	14	3.13	50.4	16.74	181.6	66.8	299.6	66.1	605	116	9770	1.55	158.5	480		3.7	16	34	300	2.6	80	0.47	0.39	1.2	0.26	1.2	1.2	0.28	1.9	0.66	6.4	2.4
D2a-27	JB17-D2a	Core	3237	77	6.11005	43.2	80	4310	1230	<LOD	1334.58	12608.9	88.2643	128	519	65.2	366	247	28.4	636	177	1339	342	1270	220	1750	299	6170	4.9	320	1027		15	310	140	3100	190	810	8.9	12	38	5.3	25	23	4	46	13	81	34
D2a-28	JB17-D2a	Core	3303	35	4.18203	79.8	136.7	1780	179.1	5810	86.4768	2294.95	23.6642	98.4	467	69.8	507	235	95	283	42.8	286	75.6	274.9	55.6	506	90.7	11120	7.77	539	875		4.3	100	8	310	4.9	85	1.6	6.7	31	5.3	42	25	5.1	24	3.2	17	2.9
D2a-29	JB17-D2a	Rim	3065	47	0.434029	53.1	88.6	95.1	326	2580	3.41784	1912.95	5.57425	1.33	13	0.67	3.9	4.95	1.14	27.9	10.89	137.8	54.5	251.7	57.8	547	101.8	10140	4.06	220.1	772		5.6	8.6	26	210	0.6	73	0.24	0.34	1.8	0.19	0.82	0.43	0.12	1.1	0.32	4.6	1.5
D2a-30	JB17-D2a	Core	3430	32	0.241756	67.1	114.5	57.2	109	<LOD	3.16828	628.946	2.33425	9.15	39.7	3.52	22.1	15.3	4.53	27.5	6.74	59.6	20.8	92.3	19.65	184.5	35.5	11130	0.53	59.1	222.2		4	5.7	12	260	0.94	20	0.3	0.58	2	0.27	1.6	1.3	0.25	1.3	0.48	2.2	1.2
D2a-31	JB17-D2a	Core	3526	55	4.23383	52.1	174.8	942	279	2200	46.1137	1484.95	14.4642	99.6	452	68.5	402	162.1	134.9	192	26.5	179	49.2	183.2	35.8	309	59.2	10390	0.94	178	519		5.6	61	29	600	4.4	65	1.1	7.1	33	4.6	32	8.5	8.6	14	1.1	11	2.9
D2a-32	JB17-D2a	Core	3418	46	<LOD	100.5	194.7	82.1	254	710	3.37444	1182.95	2.25425	1.79	14.2	0.77	4.93	3.85	3.37	21.4	7.6	93.8	36.6	172.7	40.6	398	73.9	10860	1.55	115.6	446		4.6	9	20	230	0.51	90	0.29	0.38	1.6	0.2	0.98	0.43	0.26	1.6	0.73	7.1	2
D2a-33	JB17-D2a	Rim	3269	37	0.828107	59.8	198.1	404	418	1780	6.83568	2338.95	5.03425	9.6	50	4.22	23.2	16.3	2.19	59	18.4	195	69.7	303	64.3	591	121	10470	2.36	175	616		9.6	44	24	370	1.1	210	0.72	2.8	12	0.78	5.4	3.5	0.37	12	2.8	26	6.2
D2a-34	JB17-D2a	Core	3462	33	<LOD	98.5	124.3	<LOD	310	<LOD	2.58633	2409.95	4.00425	0.401	10.58	0.176	2.09	5.91	2.39	43.1	15.7	190.4	74.8	327	71.7	675	118.5	8190	1.37	105.1	197.3		3.8	3.6	13	140	1.4	58	0.21	0.08	0.4	0.045	0.25	0.6	0.19	1.3	0.7	5.4	1.9
D2a-35	JB17-D2a	Core	3073	30	1.16694	64.2	163.5	693	359	4680	12.6731	3418.95	8.99425	5.63	32.7	2.24	13.4	16.38	2.71	76.2	26.6	294	94.7	398	91.6	870	145.1	10800	6	268	1028		5.2	57	21	350	0.9	240	0.95	0.32	1.5	0.15	1	0.97	0.31	4.2	1.2	26	6
D2a-36	JB17-D2a	Rim	2978	50	1.4516	48.7	171.1	2050	414	8100	29.4043	2348.95	10.3643	18.3	63	5.4	26.6	16.2	11.62	46.1	15.12	181.6	67.9	329	73.2	681	136.7	9930	4.5	222	973		9.6	110	31	1100	4.7	110	0.91	2.5	11	0.42	4.5	3.8	0.79	4.6	0.94	8.3	2.1
D2a-37	JB17-D2a	Rim	3160	36	0.558408	71.7	61.2	8300	796	18100	135.629	7998.95	26.4642	437	1800	188	1070	452	55	630	123	900	234	856	176	1564	280	11660	26.5	810	2750		6.2	1600	90	1300	28	1000	4.1	98	460	42	250	99	13	130	24	140	26
D2a-38	JB17-D2a	Core	2946	35	3.4487	53.1	182	435	315	3120	7.7037	2645.95	3.86425	1.01	16.2	0.8	6.4	9.4	2.84	50.7	17.27	204.2	77.5	346.6	76.8	716	135.7	10330	2.41	250	708		6.1	64	17	490	1.2	81	0.39	0.28	2.2	0.21	1.2	1.1	0.27	2.9	0.72	7.7	2.2
D2a-39	JB17-D2a	Rim	3001	45	0.803536	67.9	71.1	5890	690	15600	89.1893	5488.95	16.0643	51.6	201	24.7	132.9	85	28.5	236	61.1	519	154.1	581	115.3	997	187.6	9880	6.98	807	1907		4.1	240	110	1500	3.8	180	1.1	3.4	12	1.4	7.9	5.8	2	11	2.8	23	6.3
D2a-40	JB17-D2a	Core	2979	37	4.05594	61.3	144.4	2880	553	11300	1260	2330	19.3	20.8	83	9.1	42	19.5	12.6	58	17.9	205	75.7	326	74.4	676	131.5	10130	6.77	473	1234		8	480	68	1300	940	130	4.4	5.2	20	2.3	11	5.6	3.2	11	2.3	17	4.7
D2a-41	JB17-D2a	Core	3451	38	1.91763	85.4	167.3	253	241	<LOD	6.6	1079	3.05	29.1	86.2	10.6	58.3	33	30.4	48.4	11.9	111	35.8	153	32.9	295	52.2	9680	0.7	114.9	332		4.5	45	26	370	1.5	76	0.24	6.8	4.5	1.2	9.4	6.7	6.1	6.1	1.2	6.3	2.1
D2a-42	JB17-D2a	Core	3317	38	0.236358	75.2	173.8	176	94	<LOD	22.8	816	3.75	19.5	144	13.7	83	56	9.1	78	13.4	99	28.8	113	24.4	222	44.1	12590	0.78	145	453		6.2	31	14	300	5	85	0.81	3.9	36	3.4	20	15	2.3	19	2.6	14	3.2
D2a-43	JB17-D2a	Rim	2887	57	0.0504028	69.8	175.1	930	651	6200	11.5	2650	7.3	7.8	24.4	1.79	10.2	11.2	7.3	57	19.4	209	81	360	84	766	145	10650	2.77	267	983		6.9	110	49	1300	5.5	350	1.7	2.1	2.2	0.36	2	2.5	1.3	15	4.3	40	12
D2a-44	JB17-D2a	Core	2741	82	3.54472	63	130.2	910	514	<LOD	11.4	1670	8.1	4.4	16.7	0.87	6.7	3.8	14.3	27	10.6	127	50.7	210	50	422	90	7480	2.29	188	640		6.4	340	85	2600	1.9	330	3.4	1.5	5.9	0.34	3.3	2.7	4.4	5.9	2	21	8.9
D2a-45	JB17-D2a	Rim	3460	120	5.41021	29.5	173	20200	2050	<LOD	420	2300	22.9	19.4	142	11.3	64	31	7.1	89	27	330	80	250	44	300	35	1130	<LOD	145	710		19	7700	420	23000	230	1400	6.6	8.3	48	5	35	18	4.4	48	12	140	35
D2a-46	JB17-D2a	Core	3268	42	0.68538	70.8	164.5	180	377	1630	9.1	1910	4	0.433	11.5	0.208	2.82	4.9	1.81	34.1	12.7	161	63	283	64.8	605	112.1	8960	2.58	221	523		5.9	65	25	560	1.3	170	0.44	0.077	1.7	0.031	0.55	1	0.37	4.3	1.4	16	5.8
D2a-47	JB17-D2a	Core	3369	33	0.683142	71.7	233.7	230	314	<LOD	6.7	1682	5.15	3.56	24.7	1.54	8.3	7.7	2.03	33.7	12.4	142.5	53.1	249	57.3	523	109.8	9940	2.58	183.1	532		7.4	45	28	600	1.8	70	0.4	0.62	3.6	0.26	1.5	1.5	0.33	3.8	1.1	7.9	1.6
D2a-48	JB17-D2a	Core	3055	38	0.683616	72.8	128.7	625	530	5300	17.8	2480	7.5	2.22	18.32	0.63	4	5.24	1.38	40	14.75	197	78.8	360	81.9	782	143.9	9690	4.55	440	1261		9.8	59	22	560	4.1	130	0.64	0.39	0.92	0.15	0.94	0.5	0.17	1.9	0.97	11	4.4
D2a-49	JB17-D2a	Rim	3006	46	0.732469	64	169	1320	441	6700	8	1970	4.88	12.62	30.6	3.41	15.9	10.3	10.6	44.7	15.1	160.6	62.1	271	60.7	582	114.2	10790	2.59	254	897		11	180	43	1300	2.2	100	0.57	0.92	3.8	0.37	2.7	1.6	1.1	4.7	1.3	8.7	3.4
D3a-01	JB17-D3a	Rim	3380	37	5.11359	39.6	36	12160	278	14610	598.936	40098.9	2759.76	460	2553	243.6	1283	958	261	2022	484	3920	940	3135	552	4187	624	12080	348	1298	4020		2	570	12	540	29	1100	87	16	90	8.4	43	29	12	57	14	120	26
D3a-02	JB17-D3a	Core	3462	32	0.166243	100.2	143.9	177	578	600	21.5921	684.946	2.42425	4.75	29.8	2.53	16.9	8.5	3.13	20.4	5.34	57.1	22.05	100.6	22.62	216.7	43	11220	0.689	79.1	184.3		4	26	98	260	1.8	16	0.23	0.42	2.2	0.26	1.2	0.75	0.2	1.2	0.21	1.8	0.57
D3a-03	JB17-D3a	Core	3380	34	1.55145	71.8	125.7	697	248	1320	29.0788	4488.95	60.7642	57.5	376	43	236	129	41.1	246	61.9	484	123.6	406	77.3	662	106.6	10480	11.18	311	696		8.1	48	19	290	2	280	3.2	5	36	3.2	18	9.4	3.6	18	5.2	33	8.9
D3a-04	JB17-D3a	Rim	3362	33	4.53106	33.1	50.6	8270	230	9000	200.73	24998.9	275.764	421	2160	250	1225	663	270	1459	375	2850	612	1656	257	1773	243	17670	96.4	474	3070		3.6	410	13	1100	15	1100	15	14	120	11	56	43	14	71	14	120	24
D3a-05	JB17-D3a	Core	3454	31	1.03458	100.9	136.7	163	210.6	<LOD	25.6067	2318.95	103.164	12.5	94.6	9.05	49	38.6	6.51	100.6	24.7	235	67.8	249.6	49.7	451	75.2	9820	7.5	188.6	374		2.9	25	9.3	130	1.8	100	8.4	1.3	5.3	0.87	3	2.4	0.45	7.3	1.3	11	2.7
D3a-06	JB17-D3a	Rim	3461	38	5.82592	83.7	55.4	10760	383	12450	1128.43	37598.9	3699.76	430	3130	270	1318	1098	217.9	2440	636	4950	1072	3300	540	3920	522	17120	285	2960	3730		5.6	620	64	560	31	1300	130	15	120	13	62	45	7.8	100	25	180	43
D3a-07	JB17-D3a	Core	3459	31	4.33518	100.7	133.4	1550	387	2190	<LOD	10278.9	697.764	126.2	1001	88.8	448	285	67.3	550	146	1176	277	873	159.7	1267	190.1	10420	40.4	619	1110		2.9	140	18	310	28	760	52	8.8	69	6.4	31	17	4.3	43	12	85	19
D3a-08	JB17-D3a	Core	3417	38	2.76276	68.3	137.4	518	308	1010	69.5503	3218.95	173.764	19.6	127	15.5	84	74.9	8.05	165	44.5	352	92.4	326	63	553	96.6	8360	19.1	482	743		4	54	19	150	6.4	220	20	2.3	13	1.9	10	8.6	0.8	16	4.4	30	6.5
D3a-09	JB17-D3a	Core	3474	28	5.1294	100.2	85.5	4610	383	9840	<LOD	21798.9	1669.76	530	3320	237	1082	834	140.2	1660	405	2800	570	1596	249	1770	250	11370	129	15300	2970		4.1	180	16	550	99	1300	150	100	200	18	48	48	8.1	100	28	200	40
D3a-10	JB17-D3a	Rim	3428	29	4.17841	62.8	119.5	1600	543	3590	160.584	9388.95	639.764	168	1200	124.7	650	381	168	700	163	1066	235	723	121.1	1071	160.7	8560	89.4	444	2030		4.6	160	42	410	18	850	120	11	140	8.7	58	40	20	59	14	93	19
D3a-11	JB17-D3a	Core	3312	35	0.721231	70.9	144.3	548	400	1570	46.7647	3538.95	174.864	26.2	125.9	13.27	73.2	56.8	14.56	142.7	40.1	344	96	372	75.4	666	126.9	8530	15.16	499	653		4.4	22	29	370	3.9	140	8.8	1.1	5.9	0.7	3.9	1.9	0.87	6.7	1.9	14	3.6
D3a-12	JB17-D3a	Core	3369	37	4.62306	48.5	39	9590	312	21600	399.29	29798.9	1850.76	478	1890	210	1041	667	255	1394	364	2882	700	2330	422	3270	469	11890	333	1600	3810		2.3	350	18	1100	19	1000	94	18	140	12	42	38	12	56	15	98	24
D3a-13	JB17-D3a	Rim	2977	39	3.18563	26.58	54.1	6120	530	13600	97.9781	15448.9	247.164	473	1408	167.7	867	444	184.6	881	181.3	1321	302.4	917	148.3	1120	186.6	19030	61.2	374	2606		2.9	120	140	1000	3.4	500	7.1	15	48	4.1	30	13	6.4	28	7.5	43	8.2
D3a-14	JB17-D3a	Core	3453	28	3.41028	59.2	140.3	839	287	1420	104.597	4278.95	325.764	30.9	214	21.2	117	101.8	17.2	213	59.7	486	123.5	413	85	697	115.7	10120	21.1	149.3	926		3.5	44	13	210	7.2	230	26	2.6	18	1.7	10	8	1.8	17	4	35	7.6
D3a-15	JB17-D3a	Rim	3461	33	3.06563	76.4	155.4	600	265	770	112.843	3958.95	309.764	33.9	227	23	115.9	89.2	11.48	189	53.7	467	119.3	416	82.5	708	109.3	9420	30.5	179	674		4.8	25	10	170	7.2	220	16	1.6	14	1.3	5.5	4.4	0.5	11	2.7	23	5.9
D3a-16	JB17-D3a	Rim	3240	33	3.23087	41.2	106	2660	266	4910	264.747	10978.9	566.764	84.6	349	40.1	223	176.9	39.6	467	135.7	1125	275	900	154.9	1168	186.4	10680	55	428	1203		4.3	140	11	440	86	400	29	4	14	1.8	11	9.5	2.1	24	7.2	51	14
D3a-17	JB17-D3a	Core	3478	28	2.81911	88	137.6	262	266	690	174.69	3087.95	311.764	21.7	401	16.9	86.1	80.8	9.05	180.8	49.8	380	90.7	288.2	52.7	424	68.5	9000	22	2360	651		3.9	17	16	180	12	78	18	1.1	22	1.1	5.1	3.5	0.61	7.5	2.2	15	3.2
D3a-18	JB17-D3a	Core	3435	29	3.72731	101.1	138	628	371	2510	<LOD	4298.95	402.764	35.9	339	26.7	136.8	119	19.1	268	67.1	502	120.6	404	76.3	644	111.3	7700	42.2	2080	938		2.9	63	17	260	18	220	25	2.3	21	1.7	9.1	7	1.8	16	3.9	25	5.6
D3a-19	JB17-D3a	Rim	3472	36	5.91463	74	28.2	11860	198	18200	643.422	42498.9	1312.76	885	8310	1224	8320	4050	1791	5350	951	5590	1019	2650	391	2720	377	18510	168.3	4010	4130		2.1	420	10	1600	21	1900	75	48	430	81	520	230	96	230	42	340	54
D3a-20	JB17-D3a	Core	3433	32	1.68111	93.7	147.9	235.9	344	<LOD	53.3834	2378.95	126.164	15.83	126.1	9.21	50	45	8.58	104.2	30.3	258	68.7	257.9	53.4	463	91	8510	15.27	280	460		4.3	8.8	19	280	3.2	130	7	0.98	4.8	0.47	3	2.3	0.47	6.1	1.3	13	2.2
D3a-21	JB17-D3a	Rim	3365	29	4.99756	63.8	47.5	6640	3630	23800	358.059	26388.9	897.764	2120	9170	694	3580	2598	160	4160	839	4710	756	1718	222.2	1426	195.5	23200	104.7	6440	2544		1.9	320	470	1700	16	720	30	370	410	56	210	70	4.5	110	18	170	24
D3a-22	JB17-D3a	Core	3147	63	3.77958	23.46	66	9650	523	13170	128.033	19328.9	417.764	385	1427	159.5	829	739	188.4	1753	387	2542	512	1436	221.1	1616	244.5	21820	91.9	1422	2685		2.8	300	61	930	39	670	28	11	58	5.6	25	22	5.7	47	11	69	15
D3a-23	JB17-D3a	Core	3370	32	0.558969	75	149.3	783	343	<LOD	31.5743	2788.95	107.764	26.1	102	11.5	56.7	50.2	23.3	115	31.9	301	78.1	293	59.6	504	96.3	7760	6.27	175	440		7.4	81	47	510	6.6	190	13	4.3	12	1.6	8.2	7.5	2.3	11	3.2	30	6.2
D3a-24	JB17-D3a	Core	3403	38	3.06621	60.5	117.7	1201	338	2370	164.924	6918.95	424.764	59.9	410	45.7	238	195	26	389	102	787	195	635	114.2	931	158.9	9120	50.8	638	1364		3.6	73	16	360	20	540	49	3.1	40	4.4	23	21	1.8	40	11	77	16
D3a-25	JB17-D3a	Core	3461	31	5.41843	85.5	73.3	7050	420	11340	1179.43	27498.9	2549.76	637	2760	260	1274	948	128.5	1871	481	3640	786	2387	409	3130	448	9950	379	18400	2700		1.9	270	16	630	66	1000	180	50	150	13	70	58	4.3	96	26	220	38
D3a-26	JB17-D3a	Core	3487	36	4.01448	75	125.6	890	426	1920	211.581	5668.95	401.764	56.4	290	36.8	196	155	20.9	341	91.7	727	158	471	95.6	823	125.2	8470	20.7	267	1480		5.1	100	16	330	15	490	30	7.2	23	2.5	19	12	2.9	25	6.2	69	13
D3a-27	JB17-D3a	Rim	3433	31	5.60678	44.8	39.8	12920	202	22600	391.695	38998.9	2959.76	1131	4510	471	2483	2009	555	4470	974	5390	976	2450	410	3100	436	11240	434	7780	4400		1.4	270	13	1000	26	1100	100	30	140	14	87	68	20	210	52	260	40
D3a-28	JB17-D3a	Core	3196	75	5.60227	33.1	51	13350	297	15380	301.638	34698.9	2305.76	764	2587	295	1404	958	339.1	1834	468	3570	866	2980	575	4740	646	9180	171.8	1874	4047		2.3	350	20	590	10	1200	87	33	99	15	58	28	8.5	48	15	140	32
F2-01	JB17-F2	Core	3471	28	<LOD	100	146	<LOD	143	<LOD	5.04538	1348.95	1.15425	0.46	11.87	0.83	8.1	7.42	3.24	32.2	10	112	41.3	185	42.5	422	79.9	9530	0.747	165.6	286.4		3.6	2.3	12	130	0.53	150	0.13	0.15	0.55	0.18	1.2	0.44	0.25	3	0.99	11	3.8
F2-02	JB17-F2	Rim	3460	34	<LOD	93.1	97.6	126	108.5	1050	195.305	459.946	0.87425	2.58	15.4	1.99	16	11.65	7.12	19.6	3.87	40.6	15.58	72.7	17.59	192.9	40.5	11220	0.474	148.9	264		3	34	9.6	240	120	18	0.27	0.48	1.6	0.26	1.8	0.97	0.63	1.5	0.2	2.1	0.81
F2-03	JB17-F2	Core	3475	28	<LOD	95.3	115.6	110.8	357.3	1520	14.5394	2928.95	3.07425	0.345	21.4	0.412	5.44	9.73	2.71	62.9	21.9	256	93	377	74.1	616	106.8	8158	1.23	149	220.5		2.3	6.4	8.3	180	0.81	110	0.2	0.091	1.2	0.063	0.68	0.76	0.24	3.8	1.1	11	3.8
F2-04	JB17-F2	Core	3454	30	0.293132	99.9	68.8	<LOD	393	<LOD	6.72363	2459.95	1.85425	<LOD	11.56	0.266	4.22	9.85	2.63	61.2	19.89	225.7	78	312.8	61.9	524	89.2	7830	0.986	102.4	167.4		1.8	2.2	11	88	0.47	48	0.14	0.0099	0.39	0.025	0.25	0.37	0.11	1.5	0.46	5.4	1.8
F2-05	JB17-F2	Core	3452	29	0.13052	103.1	94.8	<LOD	325.2	<LOD	5.60605	3458.95	2.36425	0.103	19.06	0.533	8.79	17.7	4.44	97.4	30.3	328	109.5	425	82.7	674	111.7	8720	1.187	170.1	242		2.8	2.2	7	97	0.52	130	0.18	0.026	0.89	0.046	0.54	1	0.28	3.9	1.2	13	4.2
F2-06	JB17-F2	Core	3471	35	0.2865	71.5	24.7	373	342	3210	2321.96	1152.95	7.36425	48.2	278	40.4	204	55.1	29.9	66.6	12.16	108.2	36.7	151.6	30.14	271.8	52.8	9310	1.06	231	254.3		1.5	54	30	670	830	31	1.7	7.4	26	3.7	14	3	3	3.9	0.58	5.9	1.3
F2-07	JB17-F2	Core	3469	36	0.113134	98.7	158.8	95	131.4	2170	6.59697	405.946	0.52425	4.06	27	3.19	23	9.5	7.1	14.4	3	32.9	13.19	63.3	15.8	175.9	39.6	11320	0.417	104.1	240.2		6.3	17	9.4	360	0.92	18	0.15	0.47	3.7	0.58	3.8	1	1.2	1.4	0.17	2.1	0.52
F2-08	JB17-F2	Core	3464	31	<LOD	100.3	125.6	<LOD	476	<LOD	4.42159	1620.95	1.74425	<LOD	10.62	0.087	1.65	4.71	1.28	30	10.38	125.9	48.5	213	45.3	406	72.4	8300	0.968	81.6	177		3	2.6	22	94	0.7	95	0.21	0.011	0.35	0.017	0.21	0.52	0.11	2.3	0.75	7.5	2.7
F2-09	JB17-F2	Rim	3461	32	<LOD	96.3	143.5	126.6	284	<LOD	9.33124	2367.95	1.81425	2.98	32.2	2.75	22	16.7	6.9	60.3	18	195.2	68.8	292	61.5	546	101.6	8870	0.92	252	328.4		4.4	7	15	110	1.4	95	0.17	0.77	6.1	0.67	4.5	2.3	1.1	4.2	0.99	9.1	2.7
F2-10	JB17-F2	Core	3457	31	<LOD	98.7	139.7	730	162	1090	198.56	521.946	0.88425	1.71	14.3	1.34	8.9	5.72	2.47	13.7	3.69	40.7	16.23	78	19.29	206.2	44.8	9400	0.523	74.9	204.9		2.8	160	10	260	87	20	0.19	0.37	2.3	0.22	1.6	0.85	0.41	1.2	0.26	1.9	0.63
F2-11	JB17-F2	Rim	3418	29	0.051616	93.9	124.5	54.2	230	1160	11.2951	1215.95	2.05425	1.83	24.8	1.48	10.58	7.93	3.28	24.3	7.99	97.3	38.1	175.1	38.6	365	71.9	9510	0.869	132.3	275.7		2.4	3	8.9	130	0.59	89	0.19	0.14	1.3	0.11	0.73	0.4	0.17	1.8	0.51	5.7	2.1
F2-12	JB17-F2	Rim	3399	32	0.483938	83.7	47.4	571	294	900	40.4716	1960.95	4.60425	67.9	380	52.6	292	116.6	44.3	131.4	22.39	175.7	52.9	207.2	43.05	386	68.2	10050	1.22	308.4	337.3		1.9	95	20	220	3.2	81	0.32	3.4	16	2.6	14	6.7	2.1	4.8	0.9	6.4	1.9
F2-13	JB17-F2	Core	3452	34	<LOD	93.2	72.6	333	315	<LOD	7.7471	1272.95	1.18425	2.27	21	1.82	14.7	11.47	4.14	35.6	10.52	118.3	42.6	172.7	34.3	292	53	5360	0.605	245.2	141.4		3	38	17	140	0.67	96	0.16	0.22	1.2	0.15	1.2	0.87	0.27	1.5	0.57	6.8	2.2
F2-14	JB17-F2	Core	3452	36	<LOD	93.8	150.4	66.2	157.7	<LOD	7.25884	514.946	0.58425	2.7	15.2	2.31	17.5	8.7	4.64	13.78	3.66	42.3	16.92	82.3	20.48	231.2	48.4	10390	0.426	97	214.6		4.4	9.1	9.3	160	0.88	20	0.14	0.36	2	0.32	2.4	1.1	0.56	0.76	0.24	2.1	0.75
F2-15	JB17-F2	Rim	3365.9	27	0.240072	79.6	45.1	851	2330	7000	33.7444	1287.95	4.80425	56	269	37.2	200	65.2	23.8	77.1	15.06	127.6	40.27	165.5	34.81	311.2	55.91	9561	1.049	263.2	313.5		1.3	67	460	1300	1.6	28	0.19	6.8	20	3.2	16	4.9	1.5	3.8	0.47	2.4	0.6
F2-16	JB17-F2	Core	3460	30	<LOD	98.3	152.3	64.9	183	<LOD	12.3151	918.946	1.04425	2.37	21.01	1.87	15.11	9.57	5.82	25.2	7.14	80.6	30.43	140.6	32.87	345	67	9340	0.65	175.2	281.9		3.3	3.4	12	110	0.99	21	0.16	0.13	0.96	0.1	0.86	0.51	0.33	1.3	0.3	2.5	0.97
F2-17	JB17-F2	Rim	3295	30	4.3591	61.7	16.4	2130	474	4580	128.25	4518.95	8.07425	406	2070	223	1217	519	236	515	71.5	429	103.2	340	63.1	513	90.1	10040	1.49	519	504		1.3	180	30	390	8.5	190	0.54	28	150	15	81	33	16	30	3.9	23	4.6
F2-18	JB17-F2	Rim	3458	30	0.232973	100.7	156.1	29.5	189.7	740	11.23	950.946	1.06225	0.94	11.81	0.825	6.66	5.16	2.56	20.9	6.77	79.6	31.6	143.7	34.7	352	74	8910	0.683	163.8	313.3		4.2	3.9	8.8	170	0.88	36	0.084	0.12	0.86	0.096	0.63	0.33	0.2	1	0.3	3	1.1
F2-19	JB17-F2	Core	3445	34	0.0771875	100.3	92.8	42.9	499	<LOD	9.12154	5428.95	4.60425	0.376	29.15	0.879	14.2	31.2	8.17	168.6	52.3	557	187.2	702	133.9	1079	173.7	8470	1.8	332	386		3.3	4.9	25	170	0.67	160	0.21	0.058	0.76	0.085	0.87	1.8	0.51	5.1	2	21	6.4
F2-20	JB17-F2	Rim	3433	45	<LOD	101.4	175.5	1310	207	10500	305.978	487.946	1.57425	16.7	50.4	8.3	55	29.3	13.2	31.4	5.37	39.5	14.1	71	18.4	174	41.2	7950	0.42	92	187		8.8	400	19	3400	78	61	0.43	4.4	8.2	2.2	11	4.6	2.1	3.5	0.57	4.8	2
F2-21	JB17-F2	Core	3466	28	<LOD	95.6	151.9	45.8	205	2680	8.89723	773.946	0.92425	1.63	16.4	1.58	14.2	7.7	5.02	19.2	5.31	62.9	23.8	119	26.9	275	61.3	10110	0.6	129	241.1		4	5.1	11	770	1.1	75	0.14	0.25	2.3	0.27	2.3	1.4	0.65	3.3	0.74	8.6	2.3
F2-22	JB17-F2	Core	3387	29	1.67634	75.3	50.1	1362	3210	11500	68.5738	2667.95	6.00425	211.6	1000	125.4	698	277.9	107.4	267.9	38.3	249.2	64.4	229.3	43.09	365.2	64.86	9740	1.332	436.3	358.6		1	85	450	1300	2.1	54	0.32	9.6	42	4.6	27	9.4	3.3	8.8	1.2	5.5	1.4
F2-23	JB17-F2	Core	3432	30	0.413315	99.9	39	85.9	2030	5430	50.9963	996.946	2.27425	37	124.3	15	75.6	24	8.16	41.8	9.48	97.2	33.11	144	29.86	278.4	54.2	9050	0.68	169	221		1.6	6.5	130	480	12	21	0.31	2.8	6.9	0.84	4.1	1.2	0.7	1.6	0.42	1.9	0.99
F2-24	JB17-F2	Core	3463	34	<LOD	99.1	85	13.5	263	<LOD	6.19551	945.946	1.07425	0.34	8.47	0.251	2.64	3.79	1.43	19.1	6.71	82	32.2	145	33.3	333	66.8	9680	0.72	94	223		17	5	12	230	0.63	97	0.19	0.13	0.84	0.063	0.61	0.76	0.24	2.7	0.92	9.6	3.4
F2-25	JB17-F2	Rim	3461	29	0.125471	96	156	213	279	1040	12.0438	2688.95	2.70425	4.03	34.1	2.74	22.7	20.8	8.7	72.8	20.9	220	77.7	335	70.3	658	119.2	9430	1.078	315	389		3.3	19	24	160	1	220	0.28	0.93	5.2	0.5	3.6	2.9	1.3	8.1	2.2	22	7.2
F2-26	JB17-F2	Core	3483	39	<LOD	97.2	80.7	35	399	<LOD	6.89723	1648.95	1.62425	0.217	11.66	0.285	3.83	6.29	1.87	35.3	12.23	138.9	51.8	217	47	408	70.7	9230	0.92	79	167.4		3.3	21	15	110	1	77	0.22	0.055	0.64	0.05	0.39	0.45	0.12	2.1	0.62	5.3	2.9
F2-27	JB17-F2	Rim	3449	28	<LOD	101	23	30	1590	3290	6.84653	879.946	1.50425	19.7	71	6.6	32.7	11.3	3.08	26.2	7.34	78.3	28.7	125.2	27.2	254	47	9060	0.646	125.3	180		2.5	6.7	360	890	0.47	60	0.15	3.7	10	1.2	5.5	1.8	0.91	1.7	0.47	4.6	1.6
F2-28	JB17-F2	Core	3465	30	<LOD	100.1	176.3	19.1	111	<LOD	3.39614	637.946	0.53025	0.34	5.51	0.37	3.42	3.48	1.74	16.1	5.05	57.1	21.24	97.6	21.62	216.6	46.67	10900	0.524	143.4	313.1		3.4	3.8	6.3	160	0.39	16	0.09	0.1	0.74	0.13	0.81	0.45	0.26	1	0.21	1.8	0.5
F2-29	JB17-F2	Core	3467	29	0.178341	99.4	151.4	14.3	145.5	<LOD	3.7976	687.946	0.75025	0.645	10.8	0.82	8.6	4.9	1.09	15.9	4.91	57.5	22.28	104.9	25.23	264	55.9	9340	0.596	116.3	255.8		2.8	3	7.8	82	0.35	21	0.072	0.211	1.7	0.27	2.2	0.68	0.21	1	0.21	2.1	0.7
F2-30	JB17-F2	Core	3466	30	0.310375	99.9	90.5	149	273.9	610	10.1667	2999.95	2.06425	0.156	14.92	0.447	7.68	15.3	4.02	84.5	26.03	282	97	373	71.6	592	99.9	8990	1.057	144.4	214.6		2	23	7.4	140	0.67	78	0.15	0.025	0.4	0.033	0.34	0.66	0.18	2.3	0.72	6.9	2.5
F2-31	JB17-F2	Rim	3468	34	<LOD	99.4	134.8	408	407	<LOD	45.7882	2068.95	2.54425	41.7	309	44	285	127	87	159	26.9	203	62.6	248	51.4	453	90	8820	0.81	1370	324		4	61	52	270	6	370	0.52	6.7	50	6	45	22	15	28	4.8	33	9.9
F2-32	JB17-F2	Core	3469	29	<LOD	88	98.7	19.4	149.4	<LOD	7.05268	465.946	0.55425	2.33	26.5	2.52	17.9	9.4	4.9	16.3	3.71	39.2	15	70	17.12	180.5	39.49	9460	0.491	146	188		2.9	6	9.5	66	1.3	14	0.11	0.73	7.1	0.72	6.1	2.8	1.3	2.8	0.35	2	0.36
F2-33	JB17-F2	Rim	3414	33	1.53172	76.5	35.9	1250	339	3700	174.69	2968.95	7.08425	263	1210	156	840	362	160	347	49.2	297	71.7	251	49.6	412	71.6	9840	1.31	468	342		1.2	130	23	460	61	320	0.69	38	190	22	130	55	24	51	6.7	31	6.4
F2-34	JB17-F2	Core	3403	28	0.358381	92.4	42.9	310	2320	6700	21.2666	1259.95	3.34425	47.7	198	24.2	130	45.1	15.1	60.3	12.55	118.4	40.3	169.2	35.34	320	60.8	9480	0.897	205.5	268		1.2	25	610	1800	1.9	49	0.15	8	24	3.1	17	6.5	2.4	5.7	0.69	4.3	1.1
F2-35	JB17-F2	Rim	3398	30	0.303833	80.7	53.2	910	328	1100	26.3662	1075.95	2.87425	15.1	248	27.4	145	74.7	34.8	74.7	14.08	118.9	35.66	145.7	29.87	274.9	50	9560	0.946	261.2	277.8		1.1	250	19	240	2.2	35	0.19	2	27	3.2	14	7.4	3.6	5.5	0.77	4.4	0.74
F2-36	JB17-F2	Rim	3454	28	0.349695	99.5	134.5	9.7	154	<LOD	5.24069	1388.95	1.19425	0.151	9.04	0.341	5.01	7.47	2.72	33.4	10.72	123.3	43.8	188.4	39.7	368	68.3	9080	0.755	109.3	193		6.7	2	10	86	0.38	82	0.13	0.037	0.37	0.031	0.38	0.51	0.13	1.9	0.5	5.6	2.1
F2-37	JB17-F2	Rim	3135	31	0.5557	71.6	41.4	995	353	3340	65.6442	3108.95	7.18425	329	883	155	814	288	123	280	41.4	292	80.5	299	58.4	513	88.4	7870	1.25	475	540		1.7	57	8.7	330	3.7	140	0.34	33	60	10	57	23	9.1	18	1.9	14	3.7
F2-38	JB17-F2	Core	3475	28	0.115971	94.7	109.6	12.7	518	<LOD	14.8974	3127.95	3.95425	1.84	34.6	1.78	15	16.1	6.07	74.9	24.83	279.7	98	395.1	76.7	644	110.1	7950	1.53	232	278.8		2.8	2.7	13	82	0.82	78	0.14	0.24	1.7	0.24	1.7	1.1	0.57	3.1	0.9	7.5	2.5
F5-01	JB17-F5	Core	3384	33	1.58157	47.9	92	1415	739	4210	102.21	3321.95	14.9543	228	917	92.7	451	91.7	88.2	101.7	24.77	275.9	106	457	96.7	866	147.6	9460	4.16	396	779		2.1	83	39	240	3.9	75	0.88	11	59	4.7	22	4.5	6.5	3.3	0.74	8.2	2.9
F5-02	JB17-F5	Core	3416	29	0.494864	87.1	82.1	206	269	990	295.128	858.946	3.14425	21.3	114.4	15.9	75.4	14.74	5.03	26.9	6.98	75.4	28.33	126	26.48	245.3	49.5	10130	1.36	171.7	240.3		3.6	30	11	220	42	17	0.32	1.8	4.5	1.3	8.1	0.98	0.28	1.3	0.27	1.9	0.74
F5-03	JB17-F5	Core	3865	38	14.8252	32	91.3	3990	530	5470	392.78	3278.95	45.6642	770	4500	476	1600	196	95.3	180	33.5	285	89	348	70.9	617	104	9680	3.33	985	1370		1.9	200	110	430	29	200	4.8	110	500	63	240	24	9.9	19	2.6	20	5.3
F5-04	JB17-F5	Core	3432.2	27	0.324612	94.9	58.6	101.6	470	<LOD	13.3458	896.946	2.38425	11	58.9	5.84	24.2	6.69	1.95	23.14	7.02	80.3	29.54	128.2	27.69	260.2	50.23	9220	0.754	160.7	218		1.6	4.3	110	310	1.1	19	0.22	2	4.2	0.48	1.9	0.64	0.12	0.77	0.23	2.5	0.63
F5-05	JB17-F5	Core	3444	33	0.23355	90.6	74.8	119	393	570	24.9557	1036.95	2.54425	11.5	73.8	6.61	27.8	8.94	2.73	27.5	8.38	94.2	34.9	151.8	33.1	311	56	9550	0.83	178.2	253		3.2	18	18	160	15	39	0.24	1.4	6	0.63	3.7	0.98	0.36	2.2	0.4	3.5	1.3
F5-06	JB17-F5	Rim	3430	34	3.13616	70.5	76.2	460	539	<LOD	49.3688	1203.95	5.97425	68.2	349.4	41.1	182.6	37.3	12.1	48	11.76	112.1	38.7	165.3	33.35	298.7	58.9	8870	0.898	203.9	339.3		1.9	49	76	290	2.3	19	0.39	2.3	7.5	1.3	5.3	1.5	0.43	1.4	0.34	2.4	1.1
F5-07	JB17-F5	Core	3373	31	1.36476	83.2	75.1	271	390	860	19.7475	1160.95	2.14425	21.9	142	18	89	20.5	6.45	35.8	9.83	104	38.1	166.9	34.99	316.4	63.2	9670	0.735	176.7	313.9		3.3	33	41	220	1.4	30	0.11	2.3	16	2.3	10	2.1	0.55	2.1	0.38	2.9	0.94
F5-08	JB17-F5	Core	3501	30	4.73924	56.6	74.9	2120	322	2360	145.394	1297.95	13.9642	166	947	121.2	445	58.9	16.6	62.4	13.17	126	42	176.1	36.2	335	67	8850	0.9	246	464		4.6	500	21	490	15	62	1	11	78	9.6	38	5.8	1.1	5.2	0.93	6.7	1.9
F5-09	JB17-F5	Rim	3375	42	0.818039	82.9	96.7	302	1070	2900	24.4131	1241.95	4.13425	43.1	210	25.2	107	18.6	8.65	33.4	9.62	105.9	37.6	168.4	36.86	352.4	62.9	9610	1.4	349	373.8		3.4	42	480	1500	1.6	45	0.33	7.1	20	3	11	1.8	0.66	1.9	0.41	3.3	1.1
F5-10	JB17-F5	Core	3402	33	0.223235	88.8	80	201	426	620	70.8523	1335.95	3.88425	29.3	142.7	14.31	60	14.88	4.59	36.4	10.64	117.4	41.8	185.2	39.5	361	66.4	9650	1.1	241.2	306.3		2.4	15	45	170	3.9	57	0.29	2.3	7.3	0.9	4	0.79	0.27	1.1	0.3	2.8	1.3
F5-11	JB17-F5	Core	3420	40	0.67925	91	78.9	240	299	<LOD	22.6771	922.946	2.59425	23	118	11.7	62	12.7	5	27.2	7.79	86.4	32.09	134.9	28.41	263.7	48.7	8390	0.9	260	255		2.2	77	35	250	2.5	22	0.27	3.5	12	1.5	14	2.2	1.1	1.6	0.26	2.4	0.8
F5-12	JB17-F5	Core	3337	38	<LOD	83.3	83.8	600	1170	3210	41.3396	1580.95	6.15425	42.6	216	25.7	131.4	31.5	7.79	48.3	12.64	129.6	46.5	196.3	41.1	385	68.3	9610	1.15	297.4	382		3.7	170	220	890	2.5	52	0.52	1.7	16	2.4	9.7	2.3	0.46	2.1	0.51	4.8	1.7
F5-13	JB17-F5	Core	3428	26	0.11246	96.2	87.5	89	232	<LOD	14.6479	908.946	2.52425	9	72.3	5.83	25.7	7.53	3.48	24.94	7.72	84.4	30.6	133.2	28.85	269.7	50.9	9010	0.698	176.7	229.2		2.9	12	11	110	1.1	18	0.21	1.1	7.9	0.99	4.4	0.76	0.3	0.93	0.18	1.9	0.63
F5-14	JB17-F5	Core	3426	41	0.741777	98.8	121.4	17.1	293	<LOD	5.34637	2117.35	2.10885	0.26	14	0.4	5.4	9.77	2.98	53.9	17.33	193.3	68.3	278.4	57.24	502.5	87.5	9100	0.993	141.4	242.7		4.1	5.6	13	122	0.7	86	0.175	0.06	0.7	0.07	0.6	0.68	0.22	2.5	0.8	8.2	2.8
F5-15	JB17-F5	Rim	3355	33	0.172179	81.3	87.5	269	1140	2760	43.4011	1838.95	4.45425	51	264	38.9	156	34.7	12.3	64.9	16	161.4	54.4	223.7	46.8	422	76.6	10050	1.07	334	390		4.6	69	310	880	14	140	0.47	11	38	6.4	28	4.9	1.9	3	0.94	8.7	2.8
F5-16	JB17-F5	Core	2927	39	2.75399	44.3	44.7	2116	1011	4180	52.7324	4908.95	5.03425	136.1	813	77	391	182.6	119.8	345	78.3	589	140.8	452	79.3	597	94.9	8480	1.191	782	964		3.1	68	37	350	1.4	160	0.26	6.5	45	3.6	16	7.5	6.2	17	3.7	30	7.1
F5-17	JB17-F5	Core	3422	32	0.911294	91.4	72.8	2490	2430	5000	21.3751	1077.95	2.37425	27.1	107	10.8	51.1	12.1	3.01	30	8.65	96	35.32	159.1	33.24	309.2	60	9420	0.81	176.6	246.7		2.1	200	410	1200	1.9	22	0.21	4.1	10	1.4	5.8	1.2	0.19	1.4	0.26	2.9	0.85
F5-18	JB17-F5	Core	3375	36	0.558134	92.1	87	346	261	<LOD	25.1727	1081.95	3.57425	14.14	104.8	9.6	39.5	10.01	3.97	28.4	8.55	95.1	35.2	152.6	32.83	310	59.1	10080	1	196.9	277.6		2.1	70	12	110	2	31	0.29	0.98	8.2	0.97	2.7	0.86	0.32	1.7	0.38	2.9	1.3
F5-19	JB17-F5	Core	3462	30	1.05821	92	78.6	205	930	2030	21.9176	1101.95	2.24425	34.1	208	21.88	87.9	17	3.53	32.9	9.2	97.8	35.97	156.5	33.05	298.2	58.8	9640	0.849	232	261.1		1.7	19	210	560	1.8	19	0.14	3.1	10	0.98	4.8	1.1	0.18	1.2	0.23	2	0.7
F5-20	JB17-F5	Core	3405	28	0.439786	82.1	81.9	506	8400	23800	40.0375	1454.95	3.92425	136	427	51.7	226	40.5	10.9	61.1	14.37	142	47.8	204.4	40.6	362.9	70	9560	0.847	261.8	307.4		2.2	59	1200	3700	2.6	55	0.31	17	45	4.7	22	4.5	0.85	4.5	0.94	6.4	2.1
F5-21	JB17-F5	Rim	3311	35	1.64833	68.7	107.5	690	858	2870	55.4449	1881.95	6.63425	106.2	480	45.2	170	31.8	23.3	62.8	16.27	162.5	54.5	225.6	46.8	419	73.3	9510	1.31	440	509		2.7	53	97	520	3.6	87	0.56	8.6	52	5	17	2	1.5	2.7	0.97	7.4	2.2
F5-22	JB17-F5	Core	3470	32	0.370016	99.8	76.1	92	544	1130	10.2626	1173.95	2.80425	11.3	78.5	6.88	27.5	8.24	2.39	28.2	9.01	103.5	38.7	167.8	37.1	339.4	62.9	10080	1.08	212.4	285.7		2.3	11	93	370	0.87	45	0.21	2	7.4	0.77	2.4	0.64	0.24	1.1	0.29	2.9	1.1
F5-23	JB17-F5	Rim	3435	33	2.56149	45.9	68.3	1095	316	1770	91.1424	1509.95	8.60425	208	914	106.9	425	65.7	73.8	74.2	15.97	142.4	47.4	193.9	38.6	336.9	64.1	9810	1.62	334	486		5	52	18	440	5.9	66	0.74	11	37	5.7	25	4.3	4.6	3.7	0.79	3.9	1.4
F5-24	JB17-F5	Core	3440	32	0.142411	98	137.5	<LOD	349	<LOD	5.65734	1471.45	1.61932	0.31	12.8	0.34	4.4	7.5	2.76	37.8	12.62	145.6	55.17	236.5	50.77	456.5	83.8	9790	1.038	129	241.6		3.7	2.8	13	108	0.7	87	0.18	0.06	0.7	0.05	0.5	0.6	0.24	2.4	0.73	6.2	2.64
F5-25	JB17-F5	Rim	3371	27	0.622009	79.5	33	2140	186	<LOD	58.8085	751.946	5.30425	33.7	241	31.4	156	36.3	12.38	39.7	8.27	73.3	24.81	103.3	22.13	200.2	38.4	8560	0.6	101.8	202.8		1.5	120	10	180	2.6	19	0.47	1.2	11	1.1	4.8	2.4	0.4	2	0.35	2.5	0.78
F5-26	JB17-F5	Rim	3346	40	1.3438	86.5	85.9	447	1070	1300	33.0934	1291.95	7.46425	35.8	199	21.5	96	27.2	10.28	47.4	11.84	121.7	43.2	179.6	38.2	337.1	61.8	8660	1.14	304	368		3.3	28	210	320	2.6	52	0.51	2.8	13	1.9	9.1	2.3	0.83	2	0.42	4.3	1.1
Zircon reference materials
AUSZ7-1 - 1			38.2	1.7	<LOD	99.2	1.68	7	59.2	<LOD	1.75775	670.946	1.92425	<LOD	1.58	0.0323	0.725	1.83	1.706	12.65	5.28	66.5	24.45	108	23.93	215.2	37.04	4871	0.976	50.6	136.1		0.3	1.3	3.3	93	0.23	12	0.11	0.0055	0.061	0.0078	0.079	0.15	0.073	0.37	0.13	1.2	0.47
AUSZ7-1 - 2			37.7	1.2	<LOD	100.6	1.36	10.7	59.1	<LOD	2.24601	682.946	1.98425	0.0175	1.586	0.0594	0.736	2	1.811	12.92	5.51	67.1	25.24	110	23.71	217.5	36.56	4935	0.993	50.4	137.3		0.34	2	3.4	74	0.3	12	0.12	0.0064	0.072	0.0089	0.083	0.12	0.084	0.38	0.17	1.3	0.52
AUSZ7-1 - 3			39.1	1.8	<LOD	102.8	1.13	10.6	51.3	<LOD	1.72519	545.946	1.45725	0.0081	1.132	0.0247	0.588	1.33	1.162	9.44	3.9	50.06	19.65	87.9	19.84	185.3	32.19	5001	0.826	32.9	105.3		0.35	1.6	2.8	81	0.36	11	0.094	0.006	0.054	0.0065	0.075	0.12	0.061	0.42	0.12	0.89	0.44
AUSZ7-1 - 4			38.8	1.3	<LOD	97.9	1.12	12.8	66.1	<LOD	1.35629	489.946	1.28625	0.0263	1.092	0.061	1.27	2.42	1.936	12.2	4.32	52.2	18.23	79.1	17.62	164.5	29.09	4870	0.928	33.24	109.3		0.41	2.1	3.3	99	0.37	10	0.095	0.009	0.059	0.011	0.11	0.21	0.091	0.67	0.17	1.3	0.45
AUSZ7-1 - 5			39.1	1.3	<LOD	97.8	1.2	12.3	56.7	<LOD	1.35629	465.946	1.17425	0.0191	0.971	0.072	1.14	2.32	1.77	11.27	4.09	48.6	17.05	74.2	16.7	155	27.69	4842	0.879	30.23	100.5		0.43	1.8	4.2	95	0.33	10	0.15	0.0094	0.052	0.013	0.13	0.23	0.1	0.54	0.14	1.5	0.43
AUSZ7-1 - 6			40.2	1.3	<LOD	103.3	<LOD	14.2	61.6	<LOD	1.44309	499.946	1.41425	0.0109	1.096	0.074	1.38	2.37	1.903	12.21	4.57	53.3	18.81	82	18.58	171.1	29.82	4943	0.89	34.3	111.5		0.47	1.9	3	120	0.27	12	0.14	0.0084	0.072	0.013	0.17	0.2	0.087	0.49	0.15	1.3	0.53
AUSZ7-1 - 7			38.7	1.5	<LOD	99.5	1.31	14.4	69.1	<LOD	1.37799	544.946	1.53525	0.0174	1.222	0.106	1.49	2.65	2.17	13	4.95	57.8	20.32	87.1	19.5	184.7	32.34	4879	0.972	38.62	119.3		0.39	1.6	3.2	92	0.25	10	0.093	0.0062	0.052	0.012	0.13	0.18	0.12	0.4	0.15	1.5	0.47
AUSZ7-1 - 8			39.1	1.4	<LOD	100.5	1.51	13.3	56.5	<LOD	1.80115	460.146	1.14025	<LOD	1.035	0.0178	0.362	1.05	0.989	7.38	3.248	43.38	16.57	77	17.25	160.6	29.28	5199	0.657	24.91	88.5		0.47	1.7	2.6	88	0.35	8.1	0.096	0.0074	0.047	0.007	0.068	0.11	0.067	0.41	0.083	0.97	0.39
AUSZ7-1 - 9			36.2	2.1	<LOD	100.1	0.95	9.2	53.3	<LOD	1.59499	472.246	1.23125	0.011	1.044	0.0298	0.424	1.15	1.066	7.9	3.275	44.68	17.24	76.8	18.07	166.5	29.46	5132	0.67	25.92	91.5		0.53	1.7	3.5	78	0.34	7.2	0.082	0.0088	0.046	0.0071	0.07	0.11	0.068	0.34	0.087	0.82	0.33
AUSZ7-1 - 10			37.5	1.5	<LOD	102.1	1.41	13.2	62.3	<LOD	1.69264	509.446	1.23425	0.0112	1.16	0.079	1.32	2.49	2.021	12.14	4.53	53.1	18.62	80.2	18.1	169	30.3	4935	0.934	35.11	113.3		0.49	1.8	4.1	97	0.27	9.5	0.12	0.0072	0.05	0.01	0.11	0.15	0.084	0.33	0.15	1.1	0.41
AUSZ7-1 - 11			38	2.1	<LOD	100	1.54	11.3	69.6	<LOD	0.878873	507.246	1.39425	0.0058	1.152	0.073	1.24	2.48	2.05	12.22	4.57	54.08	19.01	82.5	18.43	170.9	30.91	4728	0.876	36.59	115.1		0.5	2.1	4.1	82	0.28	7.8	0.11	0.0049	0.06	0.011	0.11	0.17	0.085	0.33	0.13	0.97	0.3
AUSZ7-1 - 12			37.3	3.2	<LOD	101.8	<LOD	12	58.4	<LOD	1.41054	425.646	1.07025	0.0086	0.866	0.0525	1.1	1.92	1.544	10	3.73	44.25	15.66	68.5	15.45	143.9	25.87	4876	0.756	27.1	90.2		0.55	2	3.5	83	0.28	7.3	0.097	0.0073	0.039	0.0096	0.13	0.17	0.077	0.36	0.099	0.89	0.35
AUSZ7-1 - 13			37.1	2.8	<LOD	98.9	2.33	12.9	61.1	<LOD	2.47386	651.946	1.88425	0.0083	1.627	0.0433	0.561	1.84	1.674	11.97	5.04	64.5	24.28	106.3	23.56	211.2	37.3	5143	0.928	49.2	133.6		0.54	2.2	3.6	100	0.38	10	0.14	0.007	0.07	0.009	0.07	0.17	0.076	0.39	0.12	1.4	0.47
AUSZ7-1 - 14			35.7	2.4	<LOD	99.5	1.24	17.2	54.4	<LOD	2.12666	508.946	1.46425	<LOD	1.147	0.085	1.43	2.46	1.89	12.57	4.67	53.6	19.35	82.7	18.43	172.1	30.4	5320	0.98	34.2	114		0.82	2.1	4.5	140	0.53	12	0.15	0.0087	0.081	0.025	0.19	0.23	0.14	0.63	0.23	2	0.77
AUSZ7-1 - 15			37.8	2	<LOD	99.9	1.05	14.2	60.7	<LOD	2.53897	694.946	2.13425	0.035	1.634	0.0349	0.79	2	1.746	13.07	5.39	68.8	25.56	113.8	24.7	224.7	38.28	5293	1.108	53.3	141.1		0.68	2.3	3.8	92	0.36	10	0.15	0.01	0.075	0.0094	0.12	0.18	0.075	0.45	0.14	1.5	0.5
Plesovice - 1			342.3	6.5	0.771767	99.5347	4.36	161.8	787	<LOD	53.7089	980.946	5.11425	0.137	3.76	0.401	4.89	7.61	1.98	27.9	10.3	108.2	30.8	109.4	20.14	153.9	19.42	9560	3.24	124.9	1094		0.52	5.6	12	110	2.2	31	0.31	0.029	0.16	0.046	0.28	0.62	0.11	1.7	0.4	4.6	1.2
Plesovice - 2			338.7	4.2	0.426533	100.924	3.1	61.7	328	<LOD	53.6004	385.946	4.52425	0.0226	2.279	0.093	1.307	2.53	0.7	10.15	3.74	41.5	11.94	42.7	7.98	60.8	8.12	10060	2.77	67.1	756		0.26	1.7	17	84	1.3	15	0.3	0.0094	0.07	0.012	0.097	0.2	0.053	0.5	0.17	1.9	0.48
Plesovice - 3			342	6.8	0.152912	98.9011	9.03	44	623	154	62.8231	981.946	17.8942	0.78	9.26	0.82	7.61	10.44	2.51	36	11.98	115.3	30.61	98.4	17.06	123.4	14.83	10030	8.02	460	2897		0.6	3.4	15	89	2.9	33	0.66	0.15	0.4	0.052	0.37	0.46	0.12	1.2	0.39	3.6	0.91
Plesovice - 4			334.8	3.9	<LOD	97.4672	0.98	70.5	364	<LOD	73.6734	480.846	3.69425	0.041	1.995	0.156	1.57	3.1	0.834	12.8	4.91	51.79	15	51.12	9.27	67.1	8.72	10770	2.513	58.79	651		0.41	2.4	9.3	96	2	6.4	0.14	0.01	0.059	0.015	0.12	0.17	0.044	0.44	0.11	0.96	0.25
Plesovice - 5			338.7	6.6	<LOD	101.044	0.83	59.8	370	<LOD	69.0078	448.946	3.78425	0.017	1.753	0.152	1.36	2.62	0.76	11.31	4.66	48.5	13.95	49.8	8.74	62.9	8.14	10220	2.49	59.3	598		0.58	3.4	15	120	1.5	10	0.3	0.012	0.09	0.023	0.19	0.25	0.056	0.71	0.15	1.3	0.44
Plesovice - 6			336.9	4.7	1.57748	100.298	1.3	43.5	264.4	<LOD	64.1252	354.246	3.05425	0.0157	1.65	0.094	1.12	2.34	0.653	9.39	3.62	38.5	11.24	38.39	6.92	50.5	6.33	10990	2.009	43.5	493		0.41	2.4	6.9	85	1.7	6.8	0.15	0.006	0.078	0.011	0.1	0.16	0.044	0.35	0.12	1	0.3
Plesovice - 7			338.5	4.3	0.447318	99.4126	1.53	60.8	326.6	<LOD	74.6499	441.346	3.65425	0.0293	1.835	0.11	1.55	2.93	0.809	11.87	4.53	48.1	13.75	47.5	8.64	63.2	7.99	10930	2.43	53.96	602		0.44	2.7	9.9	77	1.8	7	0.17	0.0096	0.064	0.016	0.14	0.23	0.05	0.47	0.13	1.1	0.29
Plesovice - 8			339.8	5.5	<LOD	100.236	6.84	97.5	454	<LOD	77.037	552.946	4.09425	0.043	2.221	0.157	2.13	3.82	1.022	15.69	5.78	61	17.57	58.8	10.62	77.7	9.93	10590	2.72	67.2	708		0.61	2.8	11	110	2.8	10	0.16	0.012	0.074	0.016	0.13	0.26	0.068	0.52	0.17	1.4	0.43
Plesovice - 9			340.5	5.5	<LOD	98.6099	1.91	47.6	272.3	<LOD	56.964	355.546	3.32425	0.023	1.578	0.105	1.25	2.31	0.619	9.55	3.63	38.5	11.12	36.91	6.62	45.1	6	10690	2.02	45.8	510		0.77	3.3	8.3	130	1.5	6.2	0.26	0.01	0.093	0.018	0.16	0.23	0.054	0.51	0.15	1.1	0.28
Plesovice - 10			338.9	5.2	0.637803	98.2889	1.88	84.3	382	<LOD	75.1925	515.946	3.76425	0.085	2.185	0.143	2.24	3.74	0.958	13.95	5.32	57.3	16.33	54.5	9.52	69.9	8.83	11220	2.54	67.2	738		0.81	3.6	14	190	3.9	17	0.24	0.06	0.098	0.026	0.24	0.4	0.095	0.78	0.24	2	0.64
Plesovice - 11			342.5	6	<LOD	99.9125	1.89	67.2	306.4	<LOD	74.2159	418.846	5.10425	0.03	2.243	0.117	1.69	3.27	0.816	12.7	4.56	48.8	13.12	43.84	7.8	57.9	7.39	10430	2.65	72.7	707		0.78	3	9.4	120	2.5	9	0.23	0.0095	0.098	0.02	0.18	0.29	0.066	0.66	0.14	1.5	0.34
Plesovice - 12			340.2	4.7	0.104135	100.591	7.09	39.6	262.7	<LOD	62.9316	376.346	3.41425	0.036	1.721	0.08	0.99	2.17	0.61	10.42	3.96	41.94	12.23	41.04	7.2	52.4	6.41	10990	2.29	57.6	642		0.67	2.2	9.9	83	1.6	6.7	0.18	0.011	0.075	0.013	0.12	0.2	0.058	0.33	0.11	0.82	0.26
Plesovice - 13			336.5	4.6	<LOD	100.758	1.47	65.7	310.5	<LOD	71.9374	414.946	5.13425	0.032	2.133	0.126	1.69	3.22	0.987	12.33	4.64	47.92	13.53	45.5	7.88	58.8	7.52	10450	2.76	72.7	677		0.71	2.7	9.9	97	1.4	5	0.24	0.012	0.087	0.016	0.16	0.26	0.058	0.53	0.13	0.92	0.29
91500 - 1			1052	56	<LOD	99.7146	1.82	<LOD	23	<LOD	5.16473	134.046	0.64025	0.0063	2.537	0.0198	0.268	0.348	0.244	2.2	0.915	11.28	4.73	23.4	6.3	66.6	12.08	5349	0.556	29.76	83.4		0.27	1.7	2.6	97	0.29	2.5	0.063	0.0062	0.078	0.0062	0.051	0.055	0.025	0.15	0.049	0.41	0.1
91500 - 2			1059	72	3.0895	99.1581	1.33	6.9	15.1	<LOD	5.12133	133.346	0.70025	0.0131	2.53	0.0194	0.234	0.423	0.25	2.65	0.853	11.15	4.57	23.15	6.1	64.8	11.64	5580	0.598	28.3	80.2		0.3	1.9	2.6	100	0.45	3.4	0.096	0.0088	0.11	0.0054	0.063	0.078	0.038	0.25	0.046	0.4	0.15
91500 - 3			1081	56	<LOD	100.286	0.76	5.9	17.7	<LOD	4.82838	123.546	0.59225	0.0083	2.357	0.0202	0.151	0.329	0.174	2.15	0.768	9.98	4.22	21.67	5.7	59.5	11.12	5471	0.48	26.27	73.8		0.36	1.7	2.1	80	0.41	2.2	0.065	0.0064	0.09	0.0049	0.035	0.055	0.02	0.16	0.046	0.28	0.11
91500 - 4			1058	69	<LOD	98.5728	1.03	4.9	19.3	<LOD	4.42692	113.546	0.50425	<LOD	2.259	0.0146	0.204	0.334	0.195	1.71	0.699	9.41	3.96	20.44	5.33	56.1	10.43	5434	0.439	22.89	66.7		0.4	1.6	2.8	83	0.42	1.9	0.049	0.0061	0.077	0.0057	0.049	0.05	0.023	0.14	0.026	0.32	0.11
91500 - 5			1077	60	<LOD	101.145	0.97	7	19.4	<LOD	4.45947	120.146	0.53425	<LOD	2.189	0.0129	0.238	0.383	0.212	1.95	0.737	9.94	4.15	20.92	5.58	58.8	10.98	5524	0.404	24.87	69.6		0.41	1.7	2.4	81	0.37	2.5	0.055	0.0056	0.074	0.0052	0.046	0.067	0.023	0.13	0.038	0.33	0.1
91500 - 6			1022	68	<LOD	99.0539	1.11	8.6	20.5	<LOD	4.62222	116.946	0.54625	<LOD	2.316	0.0066	0.281	0.36	0.198	1.85	0.738	9.56	3.99	20.59	5.41	57.1	10.65	5607	0.396	23.88	67.7		0.47	1.7	2.5	70	0.39	2.5	0.063	0.0061	0.083	0.004	0.054	0.074	0.027	0.17	0.041	0.3	0.13
91500 - 7			1067	74	<LOD	99.527	1.72	5.2	17.1	<LOD	4.78497	73.9463	0.44125	<LOD	1.759	0.0035	0.121	0.162	0.119	1.18	0.436	5.96	2.667	13.61	3.58	38.59	7.4	5459	0.455	15.22	51		0.42	1.5	2.1	77	0.32	1.4	0.063	0.005	0.071	0.0029	0.04	0.043	0.018	0.13	0.031	0.22	0.071
91500 - 8			1055	84	2.47498	99.905	1.9	9.8	14.8	<LOD	4.14481	68.2463	0.47025	<LOD	1.673	0.0055	0.086	0.206	0.127	1.04	0.441	5.63	2.343	12.27	3.356	36.9	6.85	5449	0.426	14.48	48.7		0.45	2.6	2.6	93	0.37	1.4	0.065	0.0068	0.075	0.0042	0.03	0.051	0.022	0.14	0.031	0.21	0.058
91500 - 9			1071	66	<LOD	101.141	2.41	<LOD	12.6	<LOD	5.02368	167.146	0.39325	0.0115	2.421	0.0195	0.339	0.66	0.288	2.85	1.047	13.79	5.9	30.26	7.88	83.4	15.04	5550	0.444	25.16	69.9		0.59	1.9	3.1	130	0.47	3.4	0.072	0.0097	0.088	0.0077	0.07	0.13	0.039	0.27	0.064	0.57	0.2
91500 - 10			1020	71	2.33181	98.6805	1.68	10.4	14.5	<LOD	4.23161	113.546	0.54425	0.0095	2.133	0.0098	0.254	0.362	0.189	1.85	0.695	9.88	3.98	20.5	5.25	53.7	10.3	5367	0.371	23.28	64.2		0.66	2.2	3.3	92	0.48	2	0.071	0.0085	0.095	0.0058	0.064	0.098	0.033	0.18	0.042	0.36	0.12
91500 - 11			1096	92	1.01065	99.906	1.48	4.6	15.3	190	4.55712	124.446	0.46725	0.0175	2.377	0.0167	0.21	0.45	0.244	2.02	0.79	10.24	4.45	21.9	5.81	61.9	11.65	5660	0.388	25.74	71.6		0.87	2.3	4.3	120	0.59	3.6	0.094	0.009	0.099	0.0061	0.1	0.12	0.044	0.27	0.065	0.52	0.16
91500 - 12			1079	66	1.71141	97.8723	1.72	3.7	17.7	<LOD	4.34011	119.646	0.55425	<LOD	2.213	0.012	0.218	0.33	0.195	1.94	0.76	10.08	4.15	20.88	5.53	58.4	11.14	5628	0.487	24.89	69.4		0.5	1.7	2.8	81	0.43	2.5	0.069	0.007	0.079	0.0047	0.055	0.062	0.025	0.18	0.04	0.4	0.13
91500 - 13			1122	63	3.20815	100.094	1.48	4.5	18.6	<LOD	5.41429	140.246	0.62825	<LOD	2.43	0.0191	0.25	0.4	0.216	2.2	0.912	11.75	4.78	24.69	6.49	68.8	12.96	5606	0.528	28.98	81		0.5	2.2	3.3	73	0.43	2.7	0.079	0.0073	0.11	0.0057	0.061	0.07	0.026	0.19	0.05	0.4	0.11
91500 - 14			1044	66	1.96447	98.9767	1.77	4.3	16.7	<LOD	4.77412	132.646	0.59225	0.0216	2.465	0.0137	0.226	0.448	0.256	2.25	0.822	11.17	4.73	23.44	6.37	65.5	12.32	5670	0.496	27.76	77.6		0.61	1.8	3.4	98	0.41	2.7	0.07	0.0076	0.08	0.0064	0.056	0.08	0.027	0.19	0.041	0.33	0.15
91500 - 15			1083	90	<LOD	102.053	1.67	3.7	16	<LOD	5.05623	128.946	0.56425	<LOD	2.5	0.0112	0.278	0.381	0.261	2.23	0.852	11.19	4.67	23.59	6.18	65.4	11.98	5750	0.517	28.53	79.2		0.68	2.1	3.3	120	0.53	3.1	0.11	0.014	0.1	0.0075	0.077	0.088	0.032	0.22	0.041	0.44	0.2
*From U-Pb isotopic data reported in Laurent et al. (2020); c206Pb (%) corresponds to the fraction of non-radiogenic (initial) 206Pb
[truncated: 33 more columns]

## Sheet: II - compilation
Supplementary Table 1 - part II - Compilation of trace element data in Hadean-Archean zircons
Zircon spot or label	Reference	Sample	Craton/Province	Unit/Area	Type	Domain	Filter*	Age (Ma)	Age uncertainty (Ma)	Li (ppm)	Al (ppm)	P (ppm)	Ca (ppm)	Ti (ppm)	Fe (ppm)	Y (ppm)	Nb (ppm)	La (ppm)	Ce (ppm)	Pr (ppm)	Nd (ppm)	Sm (ppm)	Eu (ppm)	Gd (ppm)	Tb (ppm)	Dy (ppm)	Ho (ppm)	Er (ppm)	Tm (ppm)	Yb (ppm)	Lu (ppm)	Hf (ppm)	Ta (ppm)	Th (ppm)	U (ppm)	SiO2 in bulk rock (wt.%)	Al2O3 in bulk rock (wt.%)	CaO in bulk rock (wt.%)	Na2O in bulk rock (wt.%)	K2O in bulk rock (wt.%)	Y in bulk rock (ppm)	La in bulk rock (ppm)	Sm in bulk rock (ppm)	Eu in bulk rock (ppm)	Gd in bulk rock (ppm)	Yb in bulk rock (ppm)	Hf in bulk rock (ppm)	Th in bulk rock (ppm)	U in bulk rock (ppm)
C88-29-0M_2-4.1	Bouvier et al. (2012)	C88-29-0M	Superior	English River	Igneous_plutonic	Core	N	2700	30	17		291	3.3	22	7.2	589		0.04	33.2	0.8	7.3	7.5	1.5	7.8	9.9	57.7	16.9	73	14.2	121	21.4			150	147
C88-29-0M_5-4.1	Bouvier et al. (2012)	C88-29-0M	Superior	English River	Igneous_plutonic	Core	N	2700	30	1.9		234	5.7	25.6	17.3	855		0.67	43.5	2.1	15.9	16.7	3.7	13.5	18.5	95.5	26.1	105	20.2	170	32			220	188
C88-29-0M_5-4.2	Bouvier et al. (2012)	C88-29-0M	Superior	English River	Igneous_plutonic	Rim	Y	2700	30	15		199	0.2	19.2	5.1	438		0.03	33.7	0.2	2.1	3.1	0.9	5.1	6.1	39.8	12.8	55	11.3	107	20.7			129	159
C88-29-0M_6-3.2	Bouvier et al. (2012)	C88-29-0M	Superior	English River	Igneous_plutonic	Rim	Y	2700	30	16.6		207	0.1	18.9	6.8	387		0.02	31.5	0.2	1.6	3.1	0.7	4.1	5.3	35	10.6	51.6	10.6	99.6	18.8			103	164
C88-29-0M_7-2.1	Bouvier et al. (2012)	C88-29-0M	Superior	English River	Igneous_plutonic	Rim	Y	2700	30	21.8		254	0.1	27.9	4.9	412		0.01	33.6	0.3	3.1	4.3	1	5	6.6	40.5	11.7	52.4	10.3	91.7	17.5			144	160
C88-29-0M_7-6.1	Bouvier et al. (2012)	C88-29-0M	Superior	English River	Igneous_plutonic	Core	N	2700	30	1.4		207	0.1	8.2	2.4	822		0.02	38.6	0.6	7.3	12	2.3	11.9	15.4	85.8	23.7	98.7	19.1	165	30.1			203	173
C88-29-0M_7-6.2	Bouvier et al. (2012)	C88-29-0M	Superior	English River	Igneous_plutonic	Rim	Y	2700	30	14.4		192	0.2	17.2	4.4	349		0.02	27.1	0.2	2.7	2.9	0.5	3.8	5.1	32.5	10.3	42.8	9.2	90	17.3			76	117
C88-29-0M_7-7.3	Bouvier et al. (2012)	C88-29-0M	Superior	English River	Igneous_plutonic	Core	Y	2700	30	16.2		267	0.2	26.9	2.7	461		0.02	30.6	0.3	3.1	4.7	1.2	6.4	8.3	46.7	13.9	61.2	12	103	19.9			115	126
C88-29-0M_7-8.2	Bouvier et al. (2012)	C88-29-0M	Superior	English River	Igneous_plutonic	Rim	Y	2700	30	20.3		198	4.8	8.2	10.9	451		0.06	41.1	0.2	1.6	3	0.8	4.7	6	38.4	11.9	58.9	12.3	118	23.5			157	224
C92-30_1-2.2	Bouvier et al. (2012)	C92-30	Superior	Wawa	Igneous_plutonic	Rim	Y	2690	15	7.6		83	0.2	3.8	1.7	346		0.01	19.5	0	0.9	1.2	0.5	3.1	3.3	25.8	8.8	47.8	11	119	25.6			40	78	64.9
C92-30_2-1.1	Bouvier et al. (2012)	C92-30	Superior	Wawa	Igneous_plutonic	Core	N	2690	15	0.3		407	226.8	13.3	1.8	896		0.74	33.2	1.1	10.8	12.7	1.9	12	18.2	101	29	115	26.2	203	47.3			93	67	64.9
C92-30_2-1.2	Bouvier et al. (2012)	C92-30	Superior	Wawa	Igneous_plutonic	Rim	Y	2690	15	5.1		81	0.5	3.9	2.5	263		0	22.4	0.1	0.8	1.2	0.3	2.7	3.3	22.4	8.1	36.3	9.6	89.4	26.4			63	100	64.9
DD81-32_5-1.2	Bouvier et al. (2012)	DD81-32	Superior	Wabigoon	Igneous_plutonic	Rim	Y	2734	15	9.3		288	0.1	12.5	0.7	547		0.01	6.7	0.1	1	1.6	0.3	4.3	4.9	48.8	17.9	79.4	19.5	164	41.6			18	33
DD81-32_6-8.1	Bouvier et al. (2012)	DD81-32	Superior	Wabigoon	Igneous_plutonic	Core	Y	2734	15	0.5		257	0.1	16.2	1.3	1329		0.01	10.1	0.2	2.2	5.9	0.7	13.3	15.8	130	41.6	181	39.1	293	71.4			46	54
DD81-32_6-8.2	Bouvier et al. (2012)	DD81-32	Superior	Wabigoon	Igneous_plutonic	Rim	Y	2734	15	8.8		263	0.1	12.6	1.5	503		0	6.6	0	0.8	1.6	0.2	4.3	4.4	43.2	15	72.5	18.4	135	36			16	34
DD86-25a_2-2.2	Bouvier et al. (2012)	DD86-25a	Superior	Wabigoon	Igneous_plutonic	Rim	N	2729	15	11.4		279	189.4	7.7	4	555		0.95	11.2	1.3	5.4	3.7	0.7	5.3	6.7	48.4	17.1	77	18.2	150	38.8			55	117	68.9	16.24	4.41	3.92	1.13	9	16				0.6
DD86-25a_2-2.3	Bouvier et al. (2012)	DD86-25a	Superior	Wabigoon	Igneous_plutonic	Rim	Y	2729	15	6.9		79	0.3	1.5	6.7	223		0.02	3.3	0	0.2	0.5	0.1	1.5	1.8	16.2	5.7	30.7	8.3	75.1	21.4			30	164	68.9	16.24	4.41	3.92	1.13	9	16				0.6
DD86-25a_3-6.1	Bouvier et al. (2012)	DD86-25a	Superior	Wabigoon	Igneous_plutonic	Core	N	2729	15	3.6		201	16.1	5	17.2	1223		4.7	24.3	5	29.9	16	2.2	14.9	19.2	126	36.6	158	35.7	264	66.1			168	245	68.9	16.24	4.41	3.92	1.13	9	16				0.6
DD86-25a_3-6.3	Bouvier et al. (2012)	DD86-25a	Superior	Wabigoon	Igneous_plutonic	Rim	N	2729	15	8.4		107	9	4.7	13.4	342		2.5	12.6	3.1	14.7	6.2	0.3	2.1	3.3	24.2	7.9	42.2	10.7	89.3	27.5			57	194	68.9	16.24	4.41	3.92	1.13	9	16				0.6
DD86-25a_5-3.2	Bouvier et al. (2012)	DD86-25a	Superior	Wabigoon	Igneous_plutonic	Rim	N	2729	15	35.6		168	443.1	3.7	367	765		0.01	12.5	0	1.1	2.2	0.3	5.5	6.5	60.3	21.8	103	24.8	214	58.4			142	340	68.9	16.24	4.41	3.92	1.13	9	16				0.6
DD86-25a_5-7.2	Bouvier et al. (2012)	DD86-25a	Superior	Wabigoon	Igneous_plutonic	Rim	N	2729	15	57.6		224	185	9.8	532	1076		4.26	44.3	7.8	46.6	14.8	1.9	9.3	12	90.9	28.7	139	30.8	219	58			268	397	68.9	16.24	4.41	3.92	1.13	9	16				0.6
QX13-3_Av	Liu et al. (2013)	QX13-3	N China	Jiaobei	Igneous_plutonic	N/A	Y	2548	12					4.72		1089	2.41	0.1101	7.53	0.124	2.06	4.18	0.98	22.57	8.1	101.59	38.47	169.88	41.08	461	90.98	9213	1.2	86.73	145.34
QX27-2_Av	Liu et al. (2013)	QX27-2	N China	Jiaobei	Igneous_plutonic	N/A	Y	2544	15					5.6		622	2.7	0.7852	38.18	0.5492	5.05	5.97	2.75	22.77	6.4	64.08	20.82	84.04	20.31	235	47.18	9435	0.48	155.52	241.2
QX44-1_Av	Liu et al. (2013)	QX44-1	N China	Jiaobei	Igneous_plutonic	N/A	Y	2753	23					6.46		761	1.4	1.6445	12.09	0.5634	3.57	3.46	0.7	15.71	5.57	68.02	25.99	118.67	30.33	360	72.94	9219	0.82	138.96	288.82
QX49-1_Av	Liu et al. (2013)	QX49-1	N China	Jiaobei	Igneous_plutonic	N/A	Y	2909	19					4.82		1492	4.2	0.1167	10.53	0.1594	2.63	6.46	2.51	42.62	14.71	164.35	53.91	209.39	45.92	482	88.72	8721	1.53	98.46	243.04
QX66-1_Av	Liu et al. (2013)	QX66-1	N China	Jiaobei	Igneous_plutonic	N/A	Y	2564	12					5.38		1197	1.39	0.051	7.44	0.1467	2.49	4.88	1.15	25.84	9.32	113.37	42.39	184.87	43.92	485	95.88	9139	0.8	68.54	146.72
QX69-1_Av	Liu et al. (2013)	QX69-1	N China	Jiaobei	Igneous_plutonic	N/A	Y	2522	55					7.43		563	1.26	0.0774	14.71	0.1391	2.12	4.51	1.97	19.76	5.79	59.35	19.61	79.18	18.64	206	40.57	10294	0.63	110.51	320.47
JR12127_gr11_2@250.ais	Reimink et al. (2020)	JR12-127	Slave	Acasta GC	Igneous_plutonic	N/A	Y	3582	9	0.153818	1.47107	514.965	1.80115	2.37001	19.5119	1962.65	4.02515	0.226094	20.5592	0.713193	7.68126	4.86612	1.84298	36.1268		165.475		282.122		381.334		8125.16		265.076	189.623	73.59	14.4	1.4	4.62	2.88	8.62	69.52	4.6	1.05	2.99	0.67	6.18	13.42	0.54
JR12127_gr12_1@245.ais	Reimink et al. (2020)	JR12-127	Slave	Acasta GC	Igneous_plutonic	N/A	N	3582	9	1.58856	20.4451	324.116	92.2815	4.08119	23.2976	1175.88	4.92968	12.869	30.5228	4.27021	21.2702	7.37526	3.22062	33.4257		127.872		202.421		292.28		9166.02		128.615	215.419	73.59	14.4	1.4	4.62	2.88	8.62	69.52	4.6	1.05	2.99	0.67	6.18	13.42	0.54
JR12127_gr12_2@246.ais	Reimink et al. (2020)	JR12-127	Slave	Acasta GC	Igneous_plutonic	N/A	N	3582	9	0.11563	8.50752	1583.43	3730.23	2.85386	14.4792	1590.68	3.79556	17.6829	59.2415	7.6933	26.4971	7.52103	3.08869	39.2268		157.434		241.757		327.802		8154.77		195.251	147.727	73.59	14.4	1.4	4.62	2.88	8.62	69.52	4.6	1.05	2.99	0.67	6.18	13.42	0.54
JR12127_gr16_1@269.ais	Reimink et al. (2020)	JR12-127	Slave	Acasta GC	Igneous_plutonic	N/A	N	3582	9	3.69943	39.9319	286.12	69.6497	6.01328	71.7931	712.348	6.42371	9.73852	33.6195	5.04488	19.1893	4.34098	1.46489	12.6944		55.3298		111.563		211.565		10596.5		47.5872	262.067	73.59	14.4	1.4	4.62	2.88	8.62	69.52	4.6	1.05	2.99	0.67	6.18	13.42	0.54
JR12127_gr18_1@266.ais	Reimink et al. (2020)	JR12-127	Slave	Acasta GC	Igneous_plutonic	N/A	Y	3582	9	0.306947	0.422144	193.987	1.01705	4.11613	6.35461	513.315	2.09629	0.0899802	8.6813	0.175773	2.2243	1.73367	1.00877	11.8689		53.8182		92.85		149.04		8337.85		47.5377	50.5279	73.59	14.4	1.4	4.62	2.88	8.62	69.52	4.6	1.05	2.99	0.67	6.18	13.42	0.54
JR12127_gr20_1@265.ais	Reimink et al. (2020)	JR12-127	Slave	Acasta GC	Igneous_plutonic	N/A	N	3582	9	10.0112	1003.16	2586.07	1134.84	50.8637	731.34	3179.05	37.6375	314.975	807.677	173.034	652.117	116.842	28.5982	174.118		352.906		373.58		444.213		9780.07		364.035	451.798	73.59	14.4	1.4	4.62	2.88	8.62	69.52	4.6	1.05	2.99	0.67	6.18	13.42	0.54
JR12127_gr21_1@263.ais	Reimink et al. (2020)	JR12-127	Slave	Acasta GC	Igneous_plutonic	N/A	N	3582	9	24.9096	1689.25	479.718	915.459	17.5609	1580.9	1605.91	24.1316	36.123	140.465	19.78	73.4619	15.7509	8.22265	36.204		123.48		176.406		213.142		9251.48		76.4376	182.574	73.59	14.4	1.4	4.62	2.88	8.62	69.52	4.6	1.05	2.99	0.67	6.18	13.42	0.54
JR12127_gr26_1@255.ais	Reimink et al. (2020)	JR12-127	Slave	Acasta GC	Igneous_plutonic	N/A	Y	3582	9	0.262289	0.353393	528.194	0.355941	3.12063	11.3797	657.141	2.19719	0.0894755	10.4169	0.111763	1.5988	1.41712	0.844972	11.1934		55.3862		105.548		178.792		7651.68		47.938	63.175	73.59	14.4	1.4	4.62	2.88	8.62	69.52	4.6	1.05	2.99	0.67	6.18	13.42	0.54
JR12127_gr26_2@256.ais	Reimink et al. (2020)	JR12-127	Slave	Acasta GC	Igneous_plutonic	N/A	N	3582	9	2.97096	1443.66	869.235	1507.29	29.2133	524.018	4064.56	56.6266	216.382	1422.26	324.873	1362.35	253.601	94.237	356.311		567.661		363.628		334.31		11856.5		80.5044	425.11	73.59	14.4	1.4	4.62	2.88	8.62	69.52	4.6	1.05	2.99	0.67	6.18	13.42	0.54
JR12127_gr37_1@247.ais	Reimink et al. (2020)	JR12-127	Slave	Acasta GC	Igneous_plutonic	N/A	N	3582	9	3.59315	11.5695	512.56	89.7527	4.554	30.7917	1735.32	9.12404	3.37655	29.8273	2.84809	15.5921	6.86087	3.50422	39.9563		163.226		257.777		351.683		7915.93		206.707	190.45	73.59	14.4	1.4	4.62	2.88	8.62	69.52	4.6	1.05	2.99	0.67	6.18	13.42	0.54
JR12127_gr4_1@268.ais	Reimink et al. (2020)	JR12-127	Slave	Acasta GC	Igneous_plutonic	N/A	N	3582	9	4.80485	9.80513	358.757	65.6481	3.17415	95.6181	645.34	9.27486	4.15017	16.3732	1.521	3.78562	0.772291	0.136408	4.96359		38.6659		107.863		226.478		11440.3		78.6393	410.589	73.59	14.4	1.4	4.62	2.88	8.62	69.52	4.6	1.05	2.99	0.67	6.18	13.42	0.54
JR12127_gr44_1@270.ais	Reimink et al. (2020)	JR12-127	Slave	Acasta GC	Igneous_plutonic	N/A	N	3582	9	14.7063	235.43	440.381	827.313	9.24813	256.914	2071.08	22.7269	19.541	94.2242	16.6553	66.7596	19.3643	6.7983	59.3189		210.081		276.334		360.729		9658.56		187.712	357.45	73.59	14.4	1.4	4.62	2.88	8.62	69.52	4.6	1.05	2.99	0.67	6.18	13.42	0.54
JR12127_gr45_1@271.ais	Reimink et al. (2020)	JR12-127	Slave	Acasta GC	Igneous_plutonic	N/A	N	3582	9	16.037	220.63	690.346	711.057	21.9075	262.259	1631.28	32.7684	46.0846	216.368	43.7771	173.902	31.0017	7.34511	74.4523		194.394		251.357		335.971		11209.4		147.579	476.989	73.59	14.4	1.4	4.62	2.88	8.62	69.52	4.6	1.05	2.99	0.67	6.18	13.42	0.54
JR12127_gr46_1@272.ais	Reimink et al. (2020)	JR12-127	Slave	Acasta GC	Igneous_plutonic	N/A	N	3582	9	9.7592	614.043	447.507	3394.26	33.1396	465.468	2140.03	53.509	186.277	712.845	127.357	457.086	67.645	18.586	135.73		305.677		307.212		377.873		11589.5		198.426	814.252	73.59	14.4	1.4	4.62	2.88	8.62	69.52	4.6	1.05	2.99	0.67	6.18	13.42	0.54
JR12127_gr48_1@267.ais	Reimink et al. (2020)	JR12-127	Slave	Acasta GC	Igneous_plutonic	N/A	N	3582	9	3.02282	54.8509	371.834	22.8855	6.33121	39.1833	969.435	4.8445	0.775473	16.6311	0.676722	3.98054	2.90125	0.909269	17.0271		85.1302		155.539		254.669		8035.5		110.203	178.966	73.59	14.4	1.4	4.62	2.88	8.62	69.52	4.6	1.05	2.99	0.67	6.18	13.42	0.54
JR12127_gr51_1@262.ais	Reimink et al. (2020)	JR12-127	Slave	Acasta GC	Igneous_plutonic	N/A	N	3582	9	2.2441	106.552	386.247	187.097	7.53713	92.289	1134.74	7.73471	10.7274	79.3668	14.3933	62.9901	16.29	6.58546	37.3216		119.17		154.554		221.046		10270.8		97.4485	207.575	73.59	14.4	1.4	4.62	2.88	8.62	69.52	4.6	1.05	2.99	0.67	6.18	13.42	0.54
JR12127_gr52_1@258.ais	Reimink et al. (2020)	JR12-127	Slave	Acasta GC	Igneous_plutonic	N/A	N	3582	9	3.9895	83.8731	625.642	150.288	8.84898	69.2948	1716.28	9.43882	20.3157	104.409	15.3568	64.4008	15.7823	5.72158	45.8468		171.696		266.75		381.764		10717.3		218.641	381.823	73.59	14.4	1.4	4.62	2.88	8.62	69.52	4.6	1.05	2.99	0.67	6.18	13.42	0.54
JR12127_gr52_2@259.ais	Reimink et al. (2020)	JR12-127	Slave	Acasta GC	Igneous_plutonic	N/A	Y	3582	9	0.818168	1.48462	229.404	1.45738	1.81262	17.3428	436.022	3.42596	0.0415577	4.42323	0.0197029	0.186454	0.429355	0.0781927	4.18981		28.1233		67.914		133.999		9851.7		38.4408	131.187	73.59	14.4	1.4	4.62	2.88	8.62	69.52	4.6	1.05	2.99	0.67	6.18	13.42	0.54
JR12127_gr52_3@260.ais	Reimink et al. (2020)	JR12-127	Slave	Acasta GC	Igneous_plutonic	N/A	N	3582	9	27.9215	19.4348	716.204	1002.09	5.23009	154.293	1342.72	33.8677	6.07085	31.2404	3.32336	13.9129	4.27361	1.35149	22.3149		107.928		210.576		331.643		10677.9		217.349	498.416	73.59	14.4	1.4	4.62	2.88	8.62	69.52	4.6	1.05	2.99	0.67	6.18	13.42	0.54
JR12127_gr54_1@257.ais	Reimink et al. (2020)	JR12-127	Slave	Acasta GC	Igneous_plutonic	N/A	Y	3582	9	10.2649	9.66132	1088.19	13.5435	4.14147	71.2844	1476.24	5.16037	0.331804	8.87878	0.317378	2.14731	2.06856	0.387128	19.8789		112.313		219.78		368.828		9874.21		129.472	577.222	73.59	14.4	1.4	4.62	2.88	8.62	69.52	4.6	1.05	2.99	0.67	6.18	13.42	0.54
JR12127_gr57_1@252.ais	Reimink et al. (2020)	JR12-127	Slave	Acasta GC	Igneous_plutonic	N/A	Y	3582	9	24.0732	0.352541	671.992	0.2714	3.73688	8.57423	1014.56	4.22038	0.0933555	17.1243	0.11555	1.75379	2.00196	0.525287	16.3203		82.2991		152.082		237.6		9321.8		137.905	186.923	73.59	14.4	1.4	4.62	2.88	8.62	69.52	4.6	1.05	2.99	0.67	6.18	13.42	0.54
JR12127_gr57_2@253.ais	Reimink et al. (2020)	JR12-127	Slave	Acasta GC	Igneous_plutonic	N/A	Y	3582	9	1.10617	0.487828	562.203	0.38357	3.4567	36.9011	999.186	3.62259	0.096545	18.0365	0.130274	1.77405	1.90602	0.501154	16.0776		79.6903		148.589		239.64		9360.97		134.097	190.038	73.59	14.4	1.4	4.62	2.88	8.62	69.52	4.6	1.05	2.99	0.67	6.18	13.42	0.54
JR12127_gr57_3@254.ais	Reimink et al. (2020)	JR12-127	Slave	Acasta GC	Igneous_plutonic	N/A	N	3582	9	5.75821	7.64535	345.682	354.039	6.34117	51.7442	750.192	10.5702	1.21182	26.6918	1.40256	6.69866	2.42833	0.65037	14.0081		65.1414		113.358		177.823		9570.89		220.01	252.959	73.59	14.4	1.4	4.62	2.88	8.62	69.52	4.6	1.05	2.99	0.67	6.18	13.42	0.54
JR12127_gr6_1@264.ais	Reimink et al. (2020)	JR12-127	Slave	Acasta GC	Igneous_plutonic	N/A	N	3582	9	18.365	132.708	436.737	1149.65	12.6092	290.315	1075.78	41.6684	76.0202	287.251	58.3285	202.016	28.9562	10.0438	41.2538		125.178		191.299		320.379		12127		99.0039	662.392	73.59	14.4	1.4	4.62	2.88	8.62	69.52	4.6	1.05	2.99	0.67	6.18	13.42	0.54
JR12127_gr6_2@273.ais	Reimink et al. (2020)	JR12-127	Slave	Acasta GC	Igneous_plutonic	N/A	N	3582	9	21.8663	41.8531	624.289	785.176	12.5853	194.954	2392.82	30.5693	5.31808	40.3084	3.89196	20.0212	7.82838	3.20348	49.003		221.841		371.522		510.501		9455.64		411.471	571.543	73.59	14.4	1.4	4.62	2.88	8.62	69.52	4.6	1.05	2.99	0.67	6.18	13.42	0.54
JR12127_gr60_1@251.ais	Reimink et al. (2020)	JR12-127	Slave	Acasta GC	Igneous_plutonic	N/A	N	3582	9	3.70437	196.178	562.267	128.205	8.84145	207.204	2367.18	10.718	27.9393	80.3461	10.9962	45.4049	12.5428	5.54114	53.0551		215.969		325.194		426.297		7545.67		208.669	199.625	73.59	14.4	1.4	4.62	2.88	8.62	69.52	4.6	1.05	2.99	0.67	6.18	13.42	0.54
JR12127_gr64_1@248.ais	Reimink et al. (2020)	JR12-127	Slave	Acasta GC	Igneous_plutonic	N/A	N	3582	9	25.3396	326.592	501.556	3798.29	26.9745	435.004	1892.66	65.764	78.5904	332.322	54.1924	162.396	23.9443	8.6532	59.7028		190.139		263.864		390.217		12795.6		137.51	880.782	73.59	14.4	1.4	4.62	2.88	8.62	69.52	4.6	1.05	2.99	0.67	6.18	13.42	0.54
JR12127_gr7_1@261.ais	Reimink et al. (2020)	JR12-127	Slave	Acasta GC	Igneous_plutonic	N/A	Y	3582	9	2.32345	1.69517	448.562	1.21652	3.37871	33.9155	1011.35	5.11327	0.101844	19.0662	0.1064	0.970598	1.18727	0.148476	11.8685		71.1395		151.283		274.203		10637.3		152.199	292.01	73.59	14.4	1.4	4.62	2.88	8.62	69.52	4.6	1.05	2.99	0.67	6.18	13.42	0.54
JR12144_gr14_1@6.ais	Reimink et al. (2020)	JR12-144	Slave	Acasta GC	Igneous_plutonic	N/A	N	3545	20	16.0279	117.014	958.699	575.388	18.671	197.36	1697.88	18.1047	27.8564	111.053	18.949	91.2565	35.9136	42.7906	102.747		170.997		209.387		316.984		9158.44		222.669	671.434	73.17	14.86	1.82	3.99	3.47	3.26	28.52	3.11	2.17	2.14	0.23	3.8	7.38	0.44
JR12144_gr14_2@7.ais	Reimink et al. (2020)	JR12-144	Slave	Acasta GC	Igneous_plutonic	N/A	N	3545	20	36.1648	151.091	622.629	545.539	23.3515	83.8114	2068.72	21.0622	34.6886	147.058	23.3262	134.763	43.1899	48.4878	99.6989		190.827		258.538		373.235		7988.17		482.954	679.416	73.17	14.86	1.82	3.99	3.47	3.26	28.52	3.11	2.17	2.14	0.23	3.8	7.38	0.44
JR12144_gr19_1@4.ais	Reimink et al. (2020)	JR12-144	Slave	Acasta GC	Igneous_plutonic	N/A	Y	3545	20	3.71781	8.01998	981.293	4.57453	3.96299	77.3011	1794.95	7.77982	0.133205	17.9154	0.271096	4.22074	4.07118	0.842149	32.4623		154.535		262.607		374.647		8910.72		303.013	476.194	73.17	14.86	1.82	3.99	3.47	3.26	28.52	3.11	2.17	2.14	0.23	3.8	7.38	0.44
JR12144_gr19_2@5.ais	Reimink et al. (2020)	JR12-144	Slave	Acasta GC	Igneous_plutonic	N/A	Y	3545	20	17.065	2.65604	945.324	2.72898	2.31607	53.1846	1416.29	8.14642	0.105406	14.7668	0.146175	1.9918	2.35228	0.478862	22.0613		115.246		207.734		319.444		9301.77		203.891	410.913	73.17	14.86	1.82	3.99	3.47	3.26	28.52	3.11	2.17	2.14	0.23	3.8	7.38	0.44
JR12144_gr20_1@17.ais	Reimink et al. (2020)	JR12-144	Slave	Acasta GC	Igneous_plutonic	N/A	N	3545	20	0.764472	29.2842	397.495	92.6035	8.25681	452.206	1007.01	6.33038	9.33397	25.6829	5.34994	23.376	6.31693	3.98879	21.4247		81.1656		151.767		248.928		7293.67		105.174	263.872	73.17	14.86	1.82	3.99	3.47	3.26	28.52	3.11	2.17	2.14	0.23	3.8	7.38	0.44
JR12144_gr21_1@16.ais	Reimink et al. (2020)	JR12-144	Slave	Acasta GC	Igneous_plutonic	N/A	N	3545	20	12.1142	1426.75	553.738	417.353	15.8338	1704.83	1822.94	13.4733	22.6452	78.1096	17.89	77.3707	23.2399	18.3405	60.7946		150.22		229.461		337.544		6986.18		258.613	420.711	73.17	14.86	1.82	3.99	3.47	3.26	28.52	3.11	2.17	2.14	0.23	3.8	7.38	0.44
JR12144_gr34_1@15.ais	Reimink et al. (2020)	JR12-144	Slave	Acasta GC	Igneous_plutonic	N/A	N	3545	20	16.4053	16.7464	211.034	95.6154	1.45164	42.9999	359.448	15.371	2.30402	4.39139	1.31005	4.77736	1.51616	0.87606	7.01132		33.8896		59.2651		133.151		10219.1		47.2486	248.812	73.17	14.86	1.82	3.99	3.47	3.26	28.52	3.11	2.17	2.14	0.23	3.8	7.38	0.44
JR12144_gr41_1@23.ais	Reimink et al. (2020)	JR12-144	Slave	Acasta GC	Igneous_plutonic	N/A	N	3545	20	22.707	39.5202	498.745	333.724	4.6551	55.0973	1715.87	17.3509	4.60014	53.0201	3.99048	21.8272	5.73603	5.86053	24.6256		120.054		248.873		407.266		8442.34		238.542	530.079	73.17	14.86	1.82	3.99	3.47	3.26	28.52	3.11	2.17	2.14	0.23	3.8	7.38	0.44
JR12144_gr41_2@24.ais	Reimink et al. (2020)	JR12-144	Slave	Acasta GC	Igneous_plutonic	N/A	N	3545	20	64.4762	142.208	530.336	1553.63	6.70973	96.8648	1019.76	28.7592	2.24668	21.3548	2.85531	16.4252	4.536	5.07797	15.4789		75.7437		148.612		325.052		11422.3		53.1694	695.785	73.17	14.86	1.82	3.99	3.47	3.26	28.52	3.11	2.17	2.14	0.23	3.8	7.38	0.44
JR12144_gr53_1@22.ais	Reimink et al. (2020)	JR12-144	Slave	Acasta GC	Igneous_plutonic	N/A	Y	3545	20	2.04506	2.64281	474.737	163.381	4.31143	29.556	723.47	4.8186	0.499197	7.60131	0.434273	3.1666	2.41628	1.23065	14.8933		62.9349		110.254		179.403		7378.08		78.8356	152.495	73.17	14.86	1.82	3.99	3.47	3.26	28.52	3.11	2.17	2.14	0.23	3.8	7.38	0.44
JR12144_gr56_1@18.ais	Reimink et al. (2020)	JR12-144	Slave	Acasta GC	Igneous_plutonic	N/A	Y	3545	20	0.218692	1.76688	458.852	1.9609	2.21901	12.3561	2194.15	6.9282	0.145974	10.9471	0.503173	5.98007	4.79891	2.63326	43.3903		203.721		327.263		438.396		7493.54		175.792	177.229	73.17	14.86	1.82	3.99	3.47	3.26	28.52	3.11	2.17	2.14	0.23	3.8	7.38	0.44
JR12144_gr56_2@19.ais	Reimink et al. (2020)	JR12-144	Slave	Acasta GC	Igneous_plutonic	N/A	Y	3545	20	0.309607	96.3901	502.219	96.6484	3.22081	13.8873	1882.98	6.17167	0.156514	9.73847	0.408522	4.79125	3.88172	2.1364	33.3614		159.263		261.665		361.523		7191.39		130.736	141.12	73.17	14.86	1.82	3.99	3.47	3.26	28.52	3.11	2.17	2.14	0.23	3.8	7.38	0.44
JR12144_gr63_1@25.ais	Reimink et al. (2020)	JR12-144	Slave	Acasta GC	Igneous_plutonic	N/A	N	3545	20	24.8099	51.3958	498.842	388.034	4.17752	71.7229	1711.22	18.6928	14.9539	78.5945	6.61164	22.269	5.70522	3.81458	26.9286		126.587		256.95		444.057		9950.16		252.296	536.772	73.17	14.86	1.82	3.99	3.47	3.26	28.52	3.11	2.17	2.14	0.23	3.8	7.38	0.44
JR12144_gr63_2@25.ais	Reimink et al. (2020)	JR12-144	Slave	Acasta GC	Igneous_plutonic	N/A	N	3545	20	24.8099	51.3958	498.842	388.034	4.17752	71.7229	1711.22	18.6928	14.9539	78.5945	6.61164	22.269	5.70522	3.81458	26.9286		126.587		256.95		444.057		9950.16		252.296	536.772	73.17	14.86	1.82	3.99	3.47	3.26	28.52	3.11	2.17	2.14	0.23	3.8	7.38	0.44
JR12144_gr64_1@26.ais	Reimink et al. (2020)	JR12-144	Slave	Acasta GC	Igneous_plutonic	N/A	N	3545	20	3.07633	78.5567	332.5	234.029	7.81475	29.9553	878.148	8.30826	8.13546	30.5843	6.2161	30.9279	10.7831	9.92148	30.4737		71.8981		108.79		182.634		7266.23		56.7142	135.696	73.17	14.86	1.82	3.99	3.47	3.26	28.52	3.11	2.17	2.14	0.23	3.8	7.38	0.44
JR12144_gr64_2@27.ais	Reimink et al. (2020)	JR12-144	Slave	Acasta GC	Igneous_plutonic	N/A	N	3545	20	2.98719	139.737	415.911	219.688	14.1203	164.905	719.763	7.55047	7.54854	27.4731	5.86995	29.2397	10.0699	9.15191	28.1829		64.7044		95.0611		159.764		7523.95		51.5447	139.742	73.17	14.86	1.82	3.99	3.47	3.26	28.52	3.11	2.17	2.14	0.23	3.8	7.38	0.44
JR12144_gr7_1@2.ais	Reimink et al. (2020)	JR12-144	Slave	Acasta GC	Igneous_plutonic	N/A	N	3545	20	0.772376	8.63409	555.341	19.5837	5.69449	34.5897	855.947	6.89721	2.95023	11.8086	1.473	7.09405	3.15046	1.82989	16.7618		71.1643		130.731		205.151		7762.07		97.2823	181.036	73.17	14.86	1.82	3.99	3.47	3.26	28.52	3.11	2.17	2.14	0.23	3.8	7.38	0.44
JR12144_gr72_1@20.ais	Reimink et al. (2020)	JR12-144	Slave	Acasta GC	Igneous_plutonic	N/A	N	3545	20	1.58167	18.1864	328.546	83.0382	3.83089	21.2391	787.086	6.40249	6.31812	24.4369	3.87276	16.9834	6.32003	4.35845	20.8676		67.6582		114.194		186.452		7658.17		77.507	164.564	73.17	14.86	1.82	3.99	3.47	3.26	28.52	3.11	2.17	2.14	0.23	3.8	7.38	0.44
JR12144_gr74_1@21.ais	Reimink et al. (2020)	JR12-144	Slave	Acasta GC	Igneous_plutonic	N/A	N	3545	20	71.722	540.701	604.717	5486.41	25.2099	280.66	3212.28	60.4413	27.7991	203.023	41.5179	193.251	73.9872	49.9597	177.652		300.215		333.179		480.397		8758.13		459.357	833.569	73.17	14.86	1.82	3.99	3.47	3.26	28.52	3.11	2.17	2.14	0.23	3.8	7.38	0.44
JR12144_gr77_1@28.ais	Reimink et al. (2020)	JR12-144	Slave	Acasta GC	Igneous_plutonic	N/A	N	3545	20	16.3223	198.759	784.276	888.078	27.1207	126.955	2200.48	23.2767	31.8092	179.501	27.4495	144.783	46.3734	41.875	132.685		299.885		320.98		385.669		8500.18		313.448	496.34	73.17	14.86	1.82	3.99	3.47	3.26	28.52	3.11	2.17	2.14	0.23	3.8	7.38	0.44
JR12144_gr77_2@29.ais	Reimink et al. (2020)	JR12-144	Slave	Acasta GC	Igneous_plutonic	N/A	N	3545	20	15.112	751.651	464.839	566.074	13.9015	358.883	1490.75	12.4929	4.72206	37.9825	4.04427	21.6974	10.0611	6.0412	46.0888		141.413		214.86		312.568		8833.22		148.124	276.626	73.17	14.86	1.82	3.99	3.47	3.26	28.52	3.11	2.17	2.14	0.23	3.8	7.38	0.44
JR12144_gr8_1@3.ais	Reimink et al. (2020)	JR12-144	Slave	Acasta GC	Igneous_plutonic	N/A	N	3545	20	6.46629	9.49426	543.671	37.9969	3.62495	32.4832	1341.05	6.63128	0.748427	16.241	0.842649	5.56433	3.52916	1.74937	20.373		95.4902		174.782		278.134		8593.19		142.444	227.725	73.17	14.86	1.82	3.99	3.47	3.26	28.52	3.11	2.17	2.14	0.23	3.8	7.38	0.44
JR12144_gr80_1@30.ais	Reimink et al. (2020)	JR12-144	Slave	Acasta GC	Igneous_plutonic	N/A	N	3545	20	9.60164	59.4862	720.949	314.748	9.35466	61.9235	1592.57	14.9428	11.824	71.4533	12.3478	59.4606	18.3186	13.8951	54.6105		148.056		229.204		344.263		8109.09		212.261	267.359	73.17	14.86	1.82	3.99	3.47	3.26	28.52	3.11	2.17	2.14	0.23	3.8	7.38	0.44
JR12171_gr41_1@38.ais	Reimink et al. (2020)	JR12-171	Slave	Acasta GC	Igneous_plutonic	N/A	N	3575	8	2.61235	204.8	470.71	296.281	12.0131	105.74	2195.82	10.4272	10.4071	70.867	10.9111	52.3254	20.6194	11.4129	67.6338		238.546		329.965		449.493		7753.39		215.046	221.408	72.69	14.48	1.86	4	2.37	5.5	36.05	2.25	1.24	1.56	0.59	5.78	2.7	0.31
JR12171_gr41_2@39.ais	Reimink et al. (2020)	JR12-171	Slave	Acasta GC	Igneous_plutonic	N/A	Y	3575	8	2.2036	0.554492	532.582	1.43747	4.84293	16.759	1619.07	5.8219	0.102082	20.2538	0.457845	5.80588	4.02204	1.95842	27.4333		127.03		222.863		335.641		7894.49		140.479	159.38	72.69	14.48	1.86	4	2.37	5.5	36.05	2.25	1.24	1.56	0.59	5.78	2.7	0.31
JR12171_gr46_1@40.ais	Reimink et al. (2020)	JR12-171	Slave	Acasta GC	Igneous_plutonic	N/A	Y	3575	8	1.50915	0.248968	261.11	0.918938	2.63379	17.7267	705.113	5.34723	0.0543206	14.4451	0.067196	1.15297	1.33944	0.564813	10.09		53.2615		109.25		190.859		8373.45		63.4353	110.159	72.69	14.48	1.86	4	2.37	5.5	36.05	2.25	1.24	1.56	0.59	5.78	2.7	0.31
JR12171_gr46_1@41.ais	Reimink et al. (2020)	JR12-171	Slave	Acasta GC	Igneous_plutonic	N/A	Y	3575	8	2.25974	0.664878	531.972	2.51194	4.40647	22.625	1225.98	5.47638	0.099707	15.8788	0.283974	3.61032	2.70301	1.40717	19.099		91.2891		167.798		268.917		7613.1		91.1331	127.561	72.69	14.48	1.86	4	2.37	5.5	36.05	2.25	1.24	1.56	0.59	5.78	2.7	0.31
JR12171_gr55_1@36.ais	Reimink et al. (2020)	JR12-171	Slave	Acasta GC	Igneous_plutonic	N/A	Y	3575	8	4.16458	10.015	464.713	3.12466	5.60194	28.9201	721.481	5.53088	0.0688413	11.8153	0.099065	1.22652	1.35681	0.562223	9.94487		52.521		110.749		198.7		8082.4		63.5782	132.291	72.69	14.48	1.86	4	2.37	5.5	36.05	2.25	1.24	1.56	0.59	5.78	2.7	0.31
JR12171_gr55_2@37.ais	Reimink et al. (2020)	JR12-171	Slave	Acasta GC	Igneous_plutonic	N/A	Y	3575	8	13.1627	0.97213	472.13	1.33257	4.17566	23.1233	774.2	5.36087	0.0774805	12.8596	0.0946247	1.24052	1.42826	0.627494	11.0929		57.5992		119.62		212.052		8174.62		68.8237	122.597	72.69	14.48	1.86	4	2.37	5.5	36.05	2.25	1.24	1.56	0.59	5.78	2.7	0.31
JR12171_gr58_1@42.ais	Reimink et al. (2020)	JR12-171	Slave	Acasta GC	Igneous_plutonic	N/A	N	3575	8	2.15758	34.2943	296.13	415.427	4.71903	54.2829	1333.05	8.21275	4.56916	33.0823	3.55312	15.8611	6.437	4.05644	32.3781		135.448		211.055		297.272		9482.83		158.163	244.907	72.69	14.48	1.86	4	2.37	5.5	36.05	2.25	1.24	1.56	0.59	5.78	2.7	0.31
JR12171_gr59_1@43.ais	Reimink et al. (2020)	JR12-171	Slave	Acasta GC	Igneous_plutonic	N/A	N	3575	8	1.38496	10.169	457.552	619.601	4.507	44.6963	2273.72	8.54719	8.5165	32.7512	3.06737	16.1977	7.60835	2.49999	47.6023		203.643		318.489		417.633		7473.37		271.408	262.322	72.69	14.48	1.86	4	2.37	5.5	36.05	2.25	1.24	1.56	0.59	5.78	2.7	0.31
JR12171_gr59_2@44.ais	Reimink et al. (2020)	JR12-171	Slave	Acasta GC	Igneous_plutonic	N/A	Y	3575	8	0.579011	1.92912	304.969	8.68878	4.05039	24.9843	1780.76	6.48076	0.495085	17.6185	0.798167	8.36233	5.39097	1.9083	36.4671		159.039		252.516		338.494		7668.93		198.269	209.337	72.69	14.48	1.86	4	2.37	5.5	36.05	2.25	1.24	1.56	0.59	5.78	2.7	0.31
JR12171_gr67_1@34.ais	Reimink et al. (2020)	JR12-171	Slave	Acasta GC	Igneous_plutonic	N/A	Y	3575	8	45.7838	0.252213	676.411	1.3362	4.57655	7.06131	895.284	5.37541	0.0851105	12.8508	0.117532	1.5228	1.55936	0.756946	12.7686		66.0377		133.945		232.373		7864.9		63.5236	110.808	72.69	14.48	1.86	4	2.37	5.5	36.05	2.25	1.24	1.56	0.59	5.78	2.7	0.31
JR12171_gr67_2@35.ais	Reimink et al. (2020)	JR12-171	Slave	Acasta GC	Igneous_plutonic	N/A	Y	3575	8	16.7156	1.44325	675.593	58.6267	7.2285	21.0067	1410.54	7.37768	0.372312	24.1352	0.333013	2.99469	2.37032	1.15622	19.0406		101.945		221.546		370.837		8041.06		131.226	209.001	72.69	14.48	1.86	4	2.37	5.5	36.05	2.25	1.24	1.56	0.59	5.78	2.7	0.31
JR12171_gr71_1@45.ais	Reimink et al. (2020)	JR12-171	Slave	Acasta GC	Igneous_plutonic	N/A	Y	3575	8	0.639543	0.211217	323.431	1.57995	3.74674	24.4017	577.519	5.29334	0.0861297	12.1887	0.072173	0.918744	1.10869	0.376801	8.31037		43.249		86.7737		156.551		9086.86		54.3301	93.4971	72.69	14.48	1.86	4	2.37	5.5	36.05	2.25	1.24	1.56	0.59	5.78	2.7	0.31
JR12171_gr71_2@46.ais	Reimink et al. (2020)	JR12-171	Slave	Acasta GC	Igneous_plutonic	N/A	N	3575	8	0.713388	5.96629	317.731	19.4883	4.01747	20.1787	573.857	5.02916	1.64587	13.6322	0.947485	4.85403	1.94529	1.22957	10.8146		50.7614		95.1201		159.031		8666.26		59.1581	103.558	72.69	14.48	1.86	4	2.37	5.5	36.05	2.25	1.24	1.56	0.59	5.78	2.7	0.31
JR12171_gr71_3@47.ais	Reimink et al. (2020)	JR12-171	Slave	Acasta GC	Igneous_plutonic	N/A	N	3575	8	4.33824	8.56568	403.165	57.2897	4.48447	31.0162	635.574	6.03965	6.17017	24.422	3.31582	13.9714	3.10003	2.25422	11.4557		49.9743		96.9771		168.955		8564.49		56.8638	109.066	72.69	14.48	1.86	4	2.37	5.5	36.05	2.25	1.24	1.56	0.59	5.78	2.7	0.31
JR12171_gr74_1@48.ais	Reimink et al. (2020)	JR12-171	Slave	Acasta GC	Igneous_plutonic	N/A	Y	3575	8	2.87804	3.94517	604.969	2.5042	6.04221	24.1795	1690.87	6.1688	0.133802	21.1919	0.432925	5.21195	3.71517	1.84317	26.3491		123.971		223.791		348.353		7662.75		154.651	184.655	72.69	14.48	1.86	4	2.37	5.5	36.05	2.25	1.24	1.56	0.59	5.78	2.7	0.31
JR12171_gr74_2@49.ais	Reimink et al. (2020)	JR12-171	Slave	Acasta GC	Igneous_plutonic	N/A	N	3575	8	3.85048	18.7298	638.062	17.7309	5.82041	40.1432	1302.03	6.15136	0.652737	19.371	0.601033	4.83592	3.32945	1.6085	21.7604		102.973		187.81		298.656		7863.69		130.327	194.309	72.69	14.48	1.86	4	2.37	5.5	36.05	2.25	1.24	1.56	0.59	5.78	2.7	0.31
JR12171_gr74_3@50.ais	Reimink et al. (2020)	JR12-171	Slave	Acasta GC	Igneous_plutonic	N/A	Y	3575	8	4.47402	1.43291	632.031	1.82036	5.81601	24.43	857.485	4.9083	0.069085	14.8494	0.156127	1.96599	1.73688	0.810334	12.4624		64.6335		129.915		225.774		7784.33		70.1699	131.815	72.69	14.48	1.86	4	2.37	5.5	36.05	2.25	1.24	1.56	0.59	5.78	2.7	0.31
JR13205_gr1_1@132.ais	Reimink et al. (2020)	JR13-205	Slave	Acasta GC	Igneous_plutonic	N/A	N	3576	14	13.7737	113.41	365.911	381.499	20.0854	283.185	2051.9	16.1085	23.5849	108.073	11.3878	45.072	12.8447	5.02204	46.942		188.18		298.57		429.245		10499		270.233	505.019	69.24	15.77	2.52	4.39	2.86	16.96	131.33	8.03	1.52	5	1.55	8.52	17.97	1.06
JR13205_gr12_1@147.ais	Reimink et al. (2020)	JR13-205	Slave	Acasta GC	Igneous_plutonic	N/A	N	3576	14	10.5614	121.782	432.133	526.764	21.9306	114.205	1301.76	11.3437	40.6155	77.8101	18.5135	77.6231	17.5937	21.9968	50.6225		159.28		211.59		334.243		10534.5		38.3312	581.241	69.24	15.77	2.52	4.39	2.86	16.96	131.33	8.03	1.52	5	1.55	8.52	17.97	1.06
JR13205_gr17_1@128.ais	Reimink et al. (2020)	JR13-205	Slave	Acasta GC	Igneous_plutonic	N/A	N	3576	14	18.0397	512.748	427.402	309.485	21.9196	413.652	1076.14	12.2328	12.6469	61.5326	8.24736	32.8357	8.09394	2.90547	23.6161		80.813		142.924		282.799		10057.4		39.3796	473.026	69.24	15.77	2.52	4.39	2.86	16.96	131.33	8.03	1.52	5	1.55	8.52	17.97	1.06
JR13205_gr17_2@129.ais	Reimink et al. (2020)	JR13-205	Slave	Acasta GC	Igneous_plutonic	N/A	N	3576	14	15.287	47.6858	456.734	1262.71	12.049	133.74	1634.85	19.8586	18.9526	67.4318	6.22954	20.9888	5.04477	1.53856	28.1672		138.694		259.882		394.616		10155.5		331.866	524.051	69.24	15.77	2.52	4.39	2.86	16.96	131.33	8.03	1.52	5	1.55	8.52	17.97	1.06
JR13205_gr18_1@130.ais	Reimink et al. (2020)	JR13-205	Slave	Acasta GC	Igneous_plutonic	N/A	N	3576	14	26.4325	178.467	708.834	2713.95	18.3858	105.274	2124.88	30.7246	23.753	116	14.8318	58.1693	15.1161	7.70595	48.608		189.234		283.35		393.756		9505.91		264.142	438.925	69.24	15.77	2.52	4.39	2.86	16.96	131.33	8.03	1.52	5	1.55	8.52	17.97	1.06
JR13205_gr19_1@131.ais	Reimink et al. (2020)	JR13-205	Slave	Acasta GC	Igneous_plutonic	N/A	N	3576	14	28.8025	167.264	319.132	2147.31	30.1755	188.619	1817.47	35.7441	28.7837	164.078	20.1449	83.3098	21.3885	8.17464	64.6365		195.536		245.513		328.79		9989.54		560.443	616.711	69.24	15.77	2.52	4.39	2.86	16.96	131.33	8.03	1.52	5	1.55	8.52	17.97	1.06
JR13205_gr22_1@154.ais	Reimink et al. (2020)	JR13-205	Slave	Acasta GC	Igneous_plutonic	N/A	N	3576	14	1.00677	5.22551	342.032	20.2747	3.64351	17.2298	894.334	4.4157	1.49326	15.7179	0.50359	2.55918	1.39087	0.532291	10.537		56.0558		116.014		201.616		9955.62		77.1797	190.941	69.24	15.77	2.52	4.39	2.86	16.96	131.33	8.03	1.52	5	1.55	8.52	17.97	1.06
JR13205_gr22_2@155.ais	Reimink et al. (2020)	JR13-205	Slave	Acasta GC	Igneous_plutonic	N/A	N	3576	14	4.36984	14.3702	460.591	125.652	4.06136	37.8076	829.542	4.83753	1.68656	8.43909	0.506638	2.58414	1.55554	0.368152	12.6489		65.5294		128.852		207.636		11602.5		65.5097	260.418	69.24	15.77	2.52	4.39	2.86	16.96	131.33	8.03	1.52	5	1.55	8.52	17.97	1.06
JR13205_gr22_3@156.ais	Reimink et al. (2020)	JR13-205	Slave	Acasta GC	Igneous_plutonic	N/A	N	3576	14	4.11594	39.8861	476.835	170.996	5.03871	41.3729	1677.13	9.18807	10.0868	46.4778	3.79164	12.8855	3.53533	1.20516	23.1108		125.387		261.953		425.204		9754.75		223.529	489.984	69.24	15.77	2.52	4.39	2.86	16.96	131.33	8.03	1.52	5	1.55	8.52	17.97	1.06
JR13205_gr23_1_157.ais	Reimink et al. (2020)	JR13-205	Slave	Acasta GC	Igneous_plutonic	N/A	N	3576	14	27.7582	113.724	586.789	594.072	27.5374	102.567	2007.91	18.1479	28.1018	141.769	19.2768	74.5007	16.9177	8.01394	55.0671		191.14		285.657		421.616		10938.3		258.682	698.591	69.24	15.77	2.52	4.39	2.86	16.96	131.33	8.03	1.52	5	1.55	8.52	17.97	1.06
JR13205_gr23_2@158.ais	Reimink et al. (2020)	JR13-205	Slave	Acasta GC	Igneous_plutonic	N/A	N	3576	14	4.08954	112.601	230.781	138.557	9.22098	98.4256	661.346	6.01529	5.22859	23.7179	3.59187	15.0171	4.38472	1.74706	12.9447		47.8762		104.472		258.52		8669.9		12.1497	283.228	69.24	15.77	2.52	4.39	2.86	16.96	131.33	8.03	1.52	5	1.55	8.52	17.97	1.06
JR13205_gr23_3@159.ais	Reimink et al. (2020)	JR13-205	Slave	Acasta GC	Igneous_plutonic	N/A	N	3576	14	43.3726	115.899	639.141	584.421	33.6007	145.33	1747.07	18.7995	17.5473	110.965	13.7993	55.7967	11.6273	4.74082	28.4777		129.597		238.745		391.793		11578.9		224.099	689.983	69.24	15.77	2.52	4.39	2.86	16.96	131.33	8.03	1.52	5	1.55	8.52	17.97	1.06
JR13205_gr26_1@160.ais	Reimink et al. (2020)	JR13-205	Slave	Acasta GC	Igneous_plutonic	N/A	N	3576	14	8.03413	152.889	1007.46	277.999	17.8397	232.754	2820.54	11.226	16.9004	102.127	9.31695	43.7305	12.2409	5.92682	54.2268		215.61		360.887		478.958		9210.77		434.756	432.808	69.24	15.77	2.52	4.39	2.86	16.96	131.33	8.03	1.52	5	1.55	8.52	17.97	1.06
JR13205_gr26_2@161.ais	Reimink et al. (2020)	JR13-205	Slave	Acasta GC	Igneous_plutonic	N/A	N	3576	14	2.47181	31.1592	1022.78	152.09	6.46045	57.8697	2617.04	6.61479	6.27337	58.6481	3.84497	19.9059	8.23101	2.14445	57.0378		238.47		398.704		533.122		9081.71		581.021	498.626	69.24	15.77	2.52	4.39	2.86	16.96	131.33	8.03	1.52	5	1.55	8.52	17.97	1.06
JR13205_gr29_1@148.ais	Reimink et al. (2020)	JR13-205	Slave	Acasta GC	Igneous_plutonic	N/A	Y	3576	14	5.7285	3.42403	344.281	5.33216	3.44578	30.0905	682.099	4.43213	0.15706	7.41162	0.0800953	0.602863	0.716492	0.128353	7.56471		49.0492		112.515		231.357		12079.2		76.1213	332.848	69.24	15.77	2.52	4.39	2.86	16.96	131.33	8.03	1.52	5	1.55	8.52	17.97	1.06
JR13205_gr29_2@149.ais	Reimink et al. (2020)	JR13-205	Slave	Acasta GC	Igneous_plutonic	N/A	Y	3576	14	2.51278	1.37216	392.502	3.87631	4.8401	25.308	793.868	4.594	0.166909	13.4282	0.164966	1.5132	1.27041	0.446015	11.8524		65.6758		137.507		238.566		10918.4		109.05	228.702	69.24	15.77	2.52	4.39	2.86	16.96	131.33	8.03	1.52	5	1.55	8.52	17.97	1.06
JR13205_gr29_3@150.ais	Reimink et al. (2020)	JR13-205	Slave	Acasta GC	Igneous_plutonic	N/A	Y	3576	14	0.139672	0.440908	364.104	3.89453	8.02579	7.57962	916.308	4.58763	0.141726	22.0982	0.249994	2.69884	1.95382	0.943311	15.2259		74.872		148.705		241.994		8902.66		111.307	144.695	69.24	15.77	2.52	4.39	2.86	16.96	131.33	8.03	1.52	5	1.55	8.52	17.97	1.06
JR13205_gr29_4@151.ais	Reimink et al. (2020)	JR13-205	Slave	Acasta GC	Igneous_plutonic	N/A	N	3576	14	3.03085	4.71611	248.258	30.6894	3.99322	30.0308	386.071	5.36511	1.82572	10.6625	1.29378	4.31805	0.991139	0.279286	4.846		28.1558		67.8708		151.22		10625.1		30.2593	195.348	69.24	15.77	2.52	4.39	2.86	16.96	131.33	8.03	1.52	5	1.55	8.52	17.97	1.06
JR13205_gr29_5@152.ais	Reimink et al. (2020)	JR13-205	Slave	Acasta GC	Igneous_plutonic	N/A	Y	3576	14	0.931992	0.292507	606.252	0.844269	4.69622	15.4372	801.781	3.01125	0.08146	16.6503	0.150719	2.04442	1.79496	0.790236	13.8001		65.0383		122.316		198.739		8557.25		83.3239	98.1079	69.24	15.77	2.52	4.39	2.86	16.96	131.33	8.03	1.52	5	1.55	8.52	17.97	1.06
JR13205_gr29_6@153.ais	Reimink et al. (2020)	JR13-205	Slave	Acasta GC	Igneous_plutonic	N/A	Y	3576	14	0.317118	0.200081	309.845	0.467904	5.33889	6.93228	627.481	3.0445	0.0510265	15.0998	0.121273	1.60403	1.43844	0.616481	9.93324		48.2605		91.9366		157.283		8618.46		58.5595	78.1822	69.24	15.77	2.52	4.39	2.86	16.96	131.33	8.03	1.52	5	1.55	8.52	17.97	1.06
JR13205_gr3_1@139.ais	Reimink et al. (2020)	JR13-205	Slave	Acasta GC	Igneous_plutonic	N/A	Y	3576	14	2.563	0.368474	310.777	0.777803	4.67287	13.8217	549.26	3.23896	0.0609766	17.8592	0.140108	1.94501	1.66315	0.742368	10.3519		46.0796		82.1419		139.265		8479.36		77.1165	87.0784	69.24	15.77	2.52	4.39	2.86	16.96	131.33	8.03	1.52	5	1.55	8.52	17.97	1.06
JR13205_gr3_2@140.ais	Reimink et al. (2020)	JR13-205	Slave	Acasta GC	Igneous_plutonic	N/A	Y	3576	14	1.2294	3.19335	344.578	1.53806	5.43286	13.9671	1059.32	3.80457	0.110492	23.329	0.488033	5.67358	3.38467	1.70619	21.3315		93.3451		157.471		236.897		8535.75		161.525	140.186	69.24	15.77	2.52	4.39	2.86	16.96	131.33	8.03	1.52	5	1.55	8.52	17.97	1.06
JR13205_gr3_3@141.ais	Reimink et al. (2020)	JR13-205	Slave	Acasta GC	Igneous_plutonic	N/A	N	3576	14	4.90968	190.549	308.85	105.607	10.6409	964.561	642.085	6.60757	2.40035	14.8224	1.42766	5.8367	2.26233	0.65011	8.9466		46.534		94.1724		184.346		11712.4		50.6598	231.041	69.24	15.77	2.52	4.39	2.86	16.96	131.33	8.03	1.52	5	1.55	8.52	17.97	1.06
JR13205_gr3_4@142.ais	Reimink et al. (2020)	JR13-205	Slave	Acasta GC	Igneous_plutonic	N/A	Y	3576	14	3.98156	7.98968	321.925	9.11834	4.14148	17.5251	1282.9	4.18417	0.160336	25.6839	0.721636	7.98106	5.28045	3.04684	33.482		133.863		211.766		304.098		9085.69		286.741	215.137	69.24	15.77	2.52	4.39	2.86	16.96	131.33	8.03	1.52	5	1.55	8.52	17.97	1.06
JR13205_gr4_1@143.ais	Reimink et al. (2020)	JR13-205	Slave	Acasta GC	Igneous_plutonic	N/A	N	3576	14	7.91416	102.954	311.05	490.812	11.7274	56.7705	883.483	8.69048	9.93336	45.2996	7.12261	30.5546	7.70593	2.98389	22.3991		72.9255		102.57		159.26		10170.1		55.4821	311.227	69.24	15.77	2.52	4.39	2.86	16.96	131.33	8.03	1.52	5	1.55	8.52	17.97	1.06
JR13205_gr4_2@144.ais	Reimink et al. (2020)	JR13-205	Slave	Acasta GC	Igneous_plutonic	N/A	N	3576	14	11.7713	45.993	355.194	136.803	6.75407	42.6341	766.876	7.8566	3.2396	17.3682	2.47727	11.5002	3.45533	1.25631	11.7589		51.9356		116.835		254.279		9856.1		62.1604	545.677	69.24	15.77	2.52	4.39	2.86	16.96	131.33	8.03	1.52	5	1.55	8.52	17.97	1.06
JR13205_gr4_3@145.ais	Reimink et al. (2020)	JR13-205	Slave	Acasta GC	Igneous_plutonic	N/A	N	3576	14	9.42589	46.1705	192.79	96.0553	5.98577	63.2551	513.089	5.81247	3.04577	16.5043	2.90179	14.1912	3.97301	1.67915	11.3912		40.4047		79.8833		176.407		9273.06		10.937	320.469	69.24	15.77	2.52	4.39	2.86	16.96	131.33	8.03	1.52	5	1.55	8.52	17.97	1.06
JR13205_gr5_1@146.ais	Reimink et al. (2020)	JR13-205	Slave	Acasta GC	Igneous_plutonic	N/A	N	3576	14	7.40414	73.5979	462.666	95.4392	7.19282	114.95	762.4	7.0532	1.12793	8.76193	0.583148	2.34398	1.13624	0.279877	6.84456		42.3066		113.678		260.85		10256.7		53.2101	424.373	69.24	15.77	2.52	4.39	2.86	16.96	131.33	8.03	1.52	5	1.55	8.52	17.97	1.06
JR13206_gr12_1@121.ais	Reimink et al. (2020)	JR13-206	Slave	Acasta GC	Igneous_plutonic	N/A	N	3926	30	35.0224	137.189	303.228	2301.05	33.0482	217.456	1602.66	51.323	10.8891	68.992	11.2398	49.775	17.1565	20.4667	44.6115		140.558		206.517		326.54		12789.4		168.182	672.017	72.41	12.99	2.22	3.52	1.76	10.81	42.9	3.8	1.5	2.77	1.55	12.56	9.55	1.25
JR13206_gr12_2@122.ais	Reimink et al. (2020)	JR13-206	Slave	Acasta GC	Igneous_plutonic	N/A	N	3926	30	35.3087	165.26	427.801	418.407	23.6884	230.727	1228.74	17.9819	7.08754	37.9324	6.89459	31.9268	13.2325	13.3708	44.3102		150.218		173.929		229.137		11623.5		64.7364	591.077	72.41	12.99	2.22	3.52	1.76	10.81	42.9	3.8	1.5	2.77	1.55	12.56	9.55	1.25
JR13206_gr14_1@120.ais	Reimink et al. (2020)	JR13-206	Slave	Acasta GC	Igneous_plutonic	N/A	N	3926	30	38.2528	86.6721	404.772	419.609	22.2995	146.527	743.907	18.665	6.93915	39.0032	6.58572	28.3055	8.15204	20.5868	28.1644		83.4044		92.832		149.401		11979.7		109.155	1026.92	72.41	12.99	2.22	3.52	1.76	10.81	42.9	3.8	1.5	2.77	1.55	12.56	9.55	1.25
JR13206_gr21_1@125.ais	Reimink et al. (2020)	JR13-206	Slave	Acasta GC	Igneous_plutonic	N/A	N	3926	30	16.2194	20.311	282.068	75.292	13.7586	39.7636	743.545	12.8195	1.24432	15.4261	1.87705	8.82366	3.52835	2.73801	10.9525		50.9288		114.496		239.352		11990.1		162.073	457.785	72.41	12.99	2.22	3.52	1.76	10.81	42.9	3.8	1.5	2.77	1.55	12.56	9.55	1.25
JR13206_gr23_1@126.ais	Reimink et al. (2020)	JR13-206	Slave	Acasta GC	Igneous_plutonic	N/A	N	3926	30	63.4795	222.113	511.723	2173.74	30.6806	130.197	1497.08	65.9027	12.845	88.751	17.4821	79.9449	24.0272	17.0461	52.054		137.487		191.329		330.092		11968.7		192.694	794.702	72.41	12.99	2.22	3.52	1.76	10.81	42.9	3.8	1.5	2.77	1.55	12.56	9.55	1.25
JR13206_gr3_1@123.ais	Reimink et al. (2020)	JR13-206	Slave	Acasta GC	Igneous_plutonic	N/A	N	3926	30	5.68783	33.3494	283.576	98.3535	13.6606	110.64	735.859	12.6072	6.6936	38.3169	7.66028	36.2867	9.82617	8.30024	21.0896		54.2186		103.962		248.685		11680.4		113.832	489.958	72.41	12.99	2.22	3.52	1.76	10.81	42.9	3.8	1.5	2.77	1.55	12.56	9.55	1.25
JR13206_gr39_1@127.ais	Reimink et al. (2020)	JR13-206	Slave	Acasta GC	Igneous_plutonic	N/A	N	3926	30	15.7233	349.411	201.359	371.094	55.5141	222.452	751.186	78.2418	3.62298	22.5658	3.82921	17.448	6.85439	5.25502	14.5539		54.804		97.041		200.697		8627.91		99.5935	308.097	72.41	12.99	2.22	3.52	1.76	10.81	42.9	3.8	1.5	2.77	1.55	12.56	9.55	1.25
JR13206_gr6_1@124.ais	Reimink et al. (2020)	JR13-206	Slave	Acasta GC	Igneous_plutonic	N/A	N	3926	30	135.529	348.683	445.872	2544.78	41.2414	450.464	1806.93	50.2819	13.0144	84.2295	13.6419	59.3282	12.4127	9.7347	37.0149		141.15		247.487		434.436		12105.3		579.427	1404.26	72.41	12.99	2.22	3.52	1.76	10.81	42.9	3.8	1.5	2.77	1.55	12.56	9.55	1.25
JR13208_gr11_1@206.ais	Reimink et al. (2020)	JR13-208	Slave	Acasta GC	Igneous_plutonic	N/A	Y	3573	11	4.08757	6.85895	379.31	9.25519	4.83102	19.051	939.593	3.65704	0.298013	14.6456	0.699389	4.91696	2.66694	1.09517	14.9538		71.0953		137.155		221.93		7042.92		105.145	184.902	67.47	16.21	3	4.52	2.3	7.5	53.98	3.21	1.11	2.28	0.66	5.03	5.47	0.51
JR13208_gr11_2@207.ais	Reimink et al. (2020)	JR13-208	Slave	Acasta GC	Igneous_plutonic	N/A	N	3573	11	0.723987	0.905536	277.779	0.735823	2.78494	14.0633	1196.45	3.59637	0.0956312	24.102	10.2558	77.7759	30.7497	14.4532	93.3744		218.86		226.682		273.001		7740.43		161.09	170.21	67.47	16.21	3	4.52	2.3	7.5	53.98	3.21	1.11	2.28	0.66	5.03	5.47	0.51
JR13208_gr12_1@210.ais	Reimink et al. (2020)	JR13-208	Slave	Acasta GC	Igneous_plutonic	N/A	N	3573	11	3.8353	212.365	659.824	286.204	28.7875	117.966	2371.16	11.5719	9.21598	104.102	12.6493	57.4284	19.2996	9.36566	67.1805		252.494		365.895		496.973		7786.14		229.475	316.2	67.47	16.21	3	4.52	2.3	7.5	53.98	3.21	1.11	2.28	0.66	5.03	5.47	0.51
JR13208_gr12_2@211.ais	Reimink et al. (2020)	JR13-208	Slave	Acasta GC	Igneous_plutonic	N/A	N	3573	11	11.1523	359.955	523.775	476.277	20.1295	83.423	2774.83	28.2142	3.94748	69.8498	5.12174	29.1695	13.8216	5.15004	69.0675		285.298		421.009		557.379		7771.88		543.404	413.272	67.47	16.21	3	4.52	2.3	7.5	53.98	3.21	1.11	2.28	0.66	5.03	5.47	0.51
JR13208_gr18_1@221.ais	Reimink et al. (2020)	JR13-208	Slave	Acasta GC	Igneous_plutonic	N/A	N	3573	11	6.61431	65.7482	138.669	131.617	6.93168	84.0393	659.854	8.39251	14.1452	67.1015	11.5794	44.3303	9.78367	4.61333	21.0832		63.0155		97.9115		174.715		9143.06		85.354	470.886	67.47	16.21	3	4.52	2.3	7.5	53.98	3.21	1.11	2.28	0.66	5.03	5.47	0.51
JR13208_gr19_1@222.ais	Reimink et al. (2020)	JR13-208	Slave	Acasta GC	Igneous_plutonic	N/A	Y	3573	11	7.01132	16.0586	131.397	17.6598	5.3073	51.7091	472.035	4.10767	0.376811	10.7362	0.452662	2.3033	1.63015	0.838844	7.55936		36.3448		64.476		125.515		8609.06		58.5241	324.669	67.47	16.21	3	4.52	2.3	7.5	53.98	3.21	1.11	2.28	0.66	5.03	5.47	0.51
JR13208_gr19_2@223.ais	Reimink et al. (2020)	JR13-208	Slave	Acasta GC	Igneous_plutonic	N/A	N	3573	11	3.02974	147.178	421.662	144.961	11.8609	135.992	870.325	4.91488	11.1065	60.7897	8.55823	37.1222	11.1954	5.77862	29.1688		89.6271		116.129		161.866		7537.84		68.8457	120.164	67.47	16.21	3	4.52	2.3	7.5	53.98	3.21	1.11	2.28	0.66	5.03	5.47	0.51
JR13208_gr20_1@208.ais	Reimink et al. (2020)	JR13-208	Slave	Acasta GC	Igneous_plutonic	N/A	N	3573	11	7.83156	694.414	127.047	651.527	62.9511	236.633	422.364	39.5411	7.16671	40.8154	7.46881	29.739	8.5948	4.46725	15.4917		38.2486		48.1355		99.2045		7349.26		41.8073	222.665	67.47	16.21	3	4.52	2.3	7.5	53.98	3.21	1.11	2.28	0.66	5.03	5.47	0.51
JR13208_gr20_2@209.ais	Reimink et al. (2020)	JR13-208	Slave	Acasta GC	Igneous_plutonic	N/A	N	3573	11	1.85537	56.2425	276.397	19.1321	5.29848	63.1662	892.571	3.91358	0.762194	22.8212	1.22451	9.49037	4.80203	2.67097	24.0534		86.0061		119.461		167.955		8950.57		145.845	169.715	67.47	16.21	3	4.52	2.3	7.5	53.98	3.21	1.11	2.28	0.66	5.03	5.47	0.51
JR13208_gr22_1@216.ais	Reimink et al. (2020)	JR13-208	Slave	Acasta GC	Igneous_plutonic	N/A	Y	3573	11	0.264199	0.363149	331.812	1.23543	8.94253	9.37556	540.896	2.92296	0.0824266	12.4416	0.175001	2.16242	1.64603	1.13567	10.2168		46.8864		80.7163		127.37		7492.06		43.5161	79.4565	67.47	16.21	3	4.52	2.3	7.5	53.98	3.21	1.11	2.28	0.66	5.03	5.47	0.51
JR13208_gr22_2@217.ais	Reimink et al. (2020)	JR13-208	Slave	Acasta GC	Igneous_plutonic	N/A	N	3573	11	0.850663	58.4057	377.059	31.7099	8.52678	265.175	536.374	3.55306	0.562005	15.72	0.824926	4.86111	2.58816	1.61415	12.0089		46.7729		71.9999		109.581		7407.04		38.8977	64.0374	67.47	16.21	3	4.52	2.3	7.5	53.98	3.21	1.11	2.28	0.66	5.03	5.47	0.51
JR13208_gr23_1@225.ais	Reimink et al. (2020)	JR13-208	Slave	Acasta GC	Igneous_plutonic	N/A	N	3573	11	17.2798	324.547	267.069	682.835	47.1342	112.873	501.062	553.87	32.9368	153.47	24.7745	83.6089	17.2535	10.8704	25.2749		56.3042		64.3261		129.919		7469.04		19.0506	371.292	67.47	16.21	3	4.52	2.3	7.5	53.98	3.21	1.11	2.28	0.66	5.03	5.47	0.51
JR13208_gr23_2@226.ais	Reimink et al. (2020)	JR13-208	Slave	Acasta GC	Igneous_plutonic	N/A	N	3573	11	8.9478	108.103	70.0298	214.264	10.7524	64.2658	333.342	14.1626	9.02901	47.7684	7.24347	26.0772	6.04737	3.33226	11.2882		28.846		47.08		110.061		7891.59		11.9224	339.434	67.47	16.21	3	4.52	2.3	7.5	53.98	3.21	1.11	2.28	0.66	5.03	5.47	0.51
JR13208_gr24_1@213.ais	Reimink et al. (2020)	JR13-208	Slave	Acasta GC	Igneous_plutonic	N/A	N	3573	11	6.1115	419.622	411.854	58.9196	8.54593	167.17	881.629	7.1614	0.907964	28.8084	1.54183	7.8923	3.42452	2.20407	16.5199		72.9856		127.309		193.757		7293.02		66.0583	127.884	67.47	16.21	3	4.52	2.3	7.5	53.98	3.21	1.11	2.28	0.66	5.03	5.47	0.51
JR13208_gr24_2@214.ais	Reimink et al. (2020)	JR13-208	Slave	Acasta GC	Igneous_plutonic	N/A	Y	3573	11	1.02645	8.49447	301.069	29.7114	7.23657	28.1254	955.644	4.14678	0.37044	23.6873	0.65886	4.15917	2.35782	1.5072	17.9796		81.2843		128.903		187.542		8972.17		131.22	198.396	67.47	16.21	3	4.52	2.3	7.5	53.98	3.21	1.11	2.28	0.66	5.03	5.47	0.51
JR13208_gr24_3@215.ais	Reimink et al. (2020)	JR13-208	Slave	Acasta GC	Igneous_plutonic	N/A	Y	3573	11	2.13668	230.364	217.722	20.7431	6.3647	35.5241	909.978	4.23694	0.0957202	21.288	0.1713	2.15425	1.95812	1.34292	16.6029		77.114		123.115		190.288		9207.98		125.238	250.727	67.47	16.21	3	4.52	2.3	7.5	53.98	3.21	1.11	2.28	0.66	5.03	5.47	0.51
JR13208_gr3_1@212.ais	Reimink et al. (2020)	JR13-208	Slave	Acasta GC	Igneous_plutonic	N/A	N	3573	11	11.6905	83.6702	211.324	125.965	14.0423	68.2383	455.441	7.94004	8.22112	40.6236	7.01734	25.8493	5.95751	3.24314	11.6861		37.3942		61.7759		125.473		7958.01		80.1921	306.433	67.47	16.21	3	4.52	2.3	7.5	53.98	3.21	1.11	2.28	0.66	5.03	5.47	0.51
JR13208_gr31_1@224.ais	Reimink et al. (2020)	JR13-208	Slave	Acasta GC	Igneous_plutonic	N/A	N	3573	11	2.7666	102.904	178.385	32.3266	7.66103	55.0924	591.038	3.12283	1.90584	19.6582	1.38742	8.88625	4.23635	2.41753	18.7198		65.7123		90.0097		126.749		7744.35		95.3533	119.727	67.47	16.21	3	4.52	2.3	7.5	53.98	3.21	1.11	2.28	0.66	5.03	5.47	0.51
JR13208_gr36_1@230.ais	Reimink et al. (2020)	JR13-208	Slave	Acasta GC	Igneous_plutonic	N/A	N	3573	11	7.10192	30.9122	338.203	28.9086	9.32128	41.3381	1036.85	4.82537	0.635359	18.8419	0.450833	3.29424	2.44698	0.840375	15.3812		81.1371		159.285		253.288		7157.71		97.4821	206.387	67.47	16.21	3	4.52	2.3	7.5	53.98	3.21	1.11	2.28	0.66	5.03	5.47	0.51
JR13208_gr36_2@231.ais	Reimink et al. (2020)	JR13-208	Slave	Acasta GC	Igneous_plutonic	N/A	Y	3573	11	1.32307	1.17235	364.176	2.84944	4.07889	16.8563	1194.96	4.30736	0.0992513	14.8548	0.380942	4.86974	3.27584	1.31553	23.0404		82.2624		188.65		273.556		7401.17		162.283	171.394	67.47	16.21	3	4.52	2.3	7.5	53.98	3.21	1.11	2.28	0.66	5.03	5.47	0.51
JR13208_gr39_1@236.ais	Reimink et al. (2020)	JR13-208	Slave	Acasta GC	Igneous_plutonic	N/A	N	3573	11	14.3566	160.001	167.577	172.766	16.7904	84.1237	375.626	38.995	13.0424	58.7671	7.81603	22.8277	5.24153	2.86338	10.3776		32.4501		53.182		114.121		7155.27		45.6798	252.82	67.47	16.21	3	4.52	2.3	7.5	53.98	3.21	1.11	2.28	0.66	5.03	5.47	0.51
JR13208_gr39_2@237.ais	Reimink et al. (2020)	JR13-208	Slave	Acasta GC	Igneous_plutonic	N/A	N	3573	11	6.4174	161.388	552.737	461.325	16.895	722.148	1684.99	13.4847	38.819	229.139	25.8861	91.834	17.8694	7.6861	45.806		163.418		241.394		322.125		8521.21		243.439	352.55	67.47	16.21	3	4.52	2.3	7.5	53.98	3.21	1.11	2.28	0.66	5.03	5.47	0.51
JR13208_gr40_1@238.ais	Reimink et al. (2020)	JR13-208	Slave	Acasta GC	Igneous_plutonic	N/A	N	3573	11	5.94057	575.038	342.739	106.581	7.64034	441.049	1003.62	8.15656	5.4581	21.6804	2.70489	16.0601	7.26246	4.6474	32.0687		101.186		128.473		171.041		7376.26		119.974	136.847	67.47	16.21	3	4.52	2.3	7.5	53.98	3.21	1.11	2.28	0.66	5.03	5.47	0.51
JR13208_gr40_2@239.ais	Reimink et al. (2020)	JR13-208	Slave	Acasta GC	Igneous_plutonic	N/A	N	3573	11	15.8225	142.661	275.163	181.101	11.1879	115.362	933.896	12.8586	11.64	44.8088	6.16903	25.9474	7.12037	4.17363	21.4446		83.0086		125.4		190.391		9089.7		116.765	277.833	67.47	16.21	3	4.52	2.3	7.5	53.98	3.21	1.11	2.28	0.66	5.03	5.47	0.51
JR13208_gr46_1@232.ais	Reimink et al. (2020)	JR13-208	Slave	Acasta GC	Igneous_plutonic	N/A	N	3573	11	14.8515	96.8456	133.571	345.719	23.6246	1194.95	568.341	11.6892	94.0337	403.578	23.2597	69.5587	13.4149	6.96242	26.8829		59.3347		75.6618		137.367		8026.49		52.9715	424.339	67.47	16.21	3	4.52	2.3	7.5	53.98	3.21	1.11	2.28	0.66	5.03	5.47	0.51
JR13208_gr50_1@227.ais	Reimink et al. (2020)	JR13-208	Slave	Acasta GC	Igneous_plutonic	N/A	N	3573	11	5.24292	69.3428	291.308	544.924	10.275	474.256	721.255	9.43036	4.8717	50.0367	5.84733	23.8256	6.2362	3.38637	20.472		68.8152		94.4202		139.593		7165.65		72.1895	148.715	67.47	16.21	3	4.52	2.3	7.5	53.98	3.21	1.11	2.28	0.66	5.03	5.47	0.51
JR13208_gr50_2@228.ais	Reimink et al. (2020)	JR13-208	Slave	Acasta GC	Igneous_plutonic	N/A	N	3573	11	7.40811	38.2316	81.2265	123.461	5.66337	39.7252	438.476	4.40812	4.61322	32.677	4.16504	20.1347	6.16437	3.39048	14.2392		45.1805		66.0559		124.7		8890.67		40.5042	335.143	67.47	16.21	3	4.52	2.3	7.5	53.98	3.21	1.11	2.28	0.66	5.03	5.47	0.51
JR13208_gr53_1@229.ais	Reimink et al. (2020)	JR13-208	Slave	Acasta GC	Igneous_plutonic	N/A	N	3573	11	2.8714	113.428	517.805	165.215	21.2696	59.443	1586.83	7.23675	4.67144	54.5412	7.07456	32.6232	11.6141	5.48288	39.7117		146.993		216.101		299.967		7044.63		153.69	180.412	67.47	16.21	3	4.52	2.3	7.5	53.98	3.21	1.11	2.28	0.66	5.03	5.47	0.51
JR13208_gr55_1@233.ais	Reimink et al. (2020)	JR13-208	Slave	Acasta GC	Igneous_plutonic	N/A	N	3573	11	22.2529	445.928	190.479	421.921	42.7977	182.77	892.616	48.7728	12.2915	90.2935	16.291	64.8094	19.8953	10.3803	35.8007		108.392		121.503		217.271		7140.64		75.5881	375.087	67.47	16.21	3	4.52	2.3	7.5	53.98	3.21	1.11	2.28	0.66	5.03	5.47	0.51
JR13208_gr55_2@234.ais	Reimink et al. (2020)	JR13-208	Slave	Acasta GC	Igneous_plutonic	N/A	N	3573	11	0.69023	42.7808	436.051	124.559	11.4131	39.0796	3093.59	8.24392	0.670813	36.2193	1.92216	19.0183	13.4054	5.97786	68.2151		272.701		389.62		533.547		5671.84		319.629	254.281	67.47	16.21	3	4.52	2.3	7.5	53.98	3.21	1.11	2.28	0.66	5.03	5.47	0.51
JR13208_gr55_3@235.ais	Reimink et al. (2020)	JR13-208	Slave	Acasta GC	Igneous_plutonic	N/A	Y	3573	11	1.32885	9.90051	229.498	12.7288	4.2593	20.3747	1204.68	3.68742	0.132655	14.107	0.43004	5.23223	3.72425	1.34445	23.1925		101.435		168.892		247.523		7659.19		141.017	170.502	67.47	16.21	3	4.52	2.3	7.5	53.98	3.21	1.11	2.28	0.66	5.03	5.47	0.51
JR13208_gr6_1@218.ais	Reimink et al. (2020)	JR13-208	Slave	Acasta GC	Igneous_plutonic	N/A	N	3573	11	6.10368	240.867	244.09	228.195	8.53905	204.892	649.681	5.40123	13.4701	34.8859	6.30217	25.6222	6.94732	3.66252	19.3631		64.3845		83.5119		124.516		8642.83		55.476	103.058	67.47	16.21	3	4.52	2.3	7.5	53.98	3.21	1.11	2.28	0.66	5.03	5.47	0.51
JR13208_gr7_1@219.ais	Reimink et al. (2020)	JR13-208	Slave	Acasta GC	Igneous_plutonic	N/A	N	3573	11	4.11768	298.695	366.577	303.455	43.585	105.14	1279.24	228.893	1.68849	42.6917	2.78494	19.5764	11.473	7.07172	38.974		130.359		155.525		213.434		5602.17		164.112	205.222	67.47	16.21	3	4.52	2.3	7.5	53.98	3.21	1.11	2.28	0.66	5.03	5.47	0.51
JR13208_gr7_2@220.ais	Reimink et al. (2020)	JR13-208	Slave	Acasta GC	Igneous_plutonic	N/A	N	3573	11	7.57239	278.76	4404.17	11783.3	18.0807	139.529	2402.22	12.303	10.1499	102.978	9.44263	53.687	23.7454	14.4585	91.6289		282.277		319.496		369.37		7570.89		476.362	382.422	67.47	16.21	3	4.52	2.3	7.5	53.98	3.21	1.11	2.28	0.66	5.03	5.47	0.51
JR13304_gr1_1@169.ais	Reimink et al. (2020)	JR13-304	Slave	Acasta GC	Igneous_plutonic	N/A	N	2935	9	2.15896	11.3577	188.001	24.4816	6.73219	16.887	698.512	4.93813	1.6674	15.8466	1.17134	5.41042	2.78639	1.15892	17.5301		76.0586		126.258		213.962		9982		151.716	210.929	69.53	15.22	2.34	4.04	3.59	26.68	95.8	8.31	1.56	6.14	2.09	10.64	27.11	0.71
JR13304_gr2_1@170.ais	Reimink et al. (2020)	JR13-304	Slave	Acasta GC	Igneous_plutonic	N/A	Y	2935	9	5.11829	4.3632	134.528	201.906	1.44187	15.8751	386.332	3.73095	0.220561	4.34769	0.132269	0.476776	0.467503	0.158547	2.90223		20.0457		58.8302		165.598		14172.7		60.245	273.155	69.53	15.22	2.34	4.04	3.59	26.68	95.8	8.31	1.56	6.14	2.09	10.64	27.11	0.71
JR13304_gr3_1@171.ais	Reimink et al. (2020)	JR13-304	Slave	Acasta GC	Igneous_plutonic	N/A	N	2935	9	2.34992	10.2214	1356.9	12.8811	5.43515	41.3667	1564.86	4.88232	2.62137	41.3141	2.9954	16.6267	6.57732	2.42028	33.7945		137.961		210.3		289.931		8601.05		213.705	187.721	69.53	15.22	2.34	4.04	3.59	26.68	95.8	8.31	1.56	6.14	2.09	10.64	27.11	0.71
JR13304_gr3_2@172.ais	Reimink et al. (2020)	JR13-304	Slave	Acasta GC	Igneous_plutonic	N/A	Y	2935	9	2.84387	2.76574	537.453	3.3278	7.4373	15.1954	1758.6	4.88805	0.132552	37.5679	0.729398	8.42147	5.62484	2.32072	36.7808		158.442		245.954		329.613		8783.52		297.423	220.893	69.53	15.22	2.34	4.04	3.59	26.68	95.8	8.31	1.56	6.14	2.09	10.64	27.11	0.71
JR13304_gr4_1@173.ais	Reimink et al. (2020)	JR13-304	Slave	Acasta GC	Igneous_plutonic	N/A	N	2935	9	7.9365	74.0104	405.163	112.668	6.93903	47.4181	1498.85	7.11007	12.8379	107.808	12.4602	75.4621	12.8849	12.124	35.5802		127.703		203.056		304.892		10052.9		240.684	313.848	69.53	15.22	2.34	4.04	3.59	26.68	95.8	8.31	1.56	6.14	2.09	10.64	27.11	0.71
JR13304_gr4_2@174.ais	Reimink et al. (2020)	JR13-304	Slave	Acasta GC	Igneous_plutonic	N/A	N	2935	9	6.17828	38.5547	89.3181	71.0855	5.59653	24.0116	407.319	5.17917	6.30509	41.4532	7.1542	36.8117	6.33814	3.95645	9.29067		24.6406		53.1382		139.996		10034.6		50.0309	306.73	69.53	15.22	2.34	4.04	3.59	26.68	95.8	8.31	1.56	6.14	2.09	10.64	27.11	0.71
JR13304_gr5_2@176.ais	Reimink et al. (2020)	JR13-304	Slave	Acasta GC	Igneous_plutonic	N/A	N	2935	9	6.10064	88.8744	122.285	44.1812	11.884	74.4331	588.145	5.4735	6.57308	36.704	7.52714	36.2919	9.57951	3.13628	18.2665		46.6493		81.9377		171.872		11051.8		65.2565	352.55	69.53	15.22	2.34	4.04	3.59	26.68	95.8	8.31	1.56	6.14	2.09	10.64	27.11	0.71
JR13304_gr5_3@177.ais	Reimink et al. (2020)	JR13-304	Slave	Acasta GC	Igneous_plutonic	N/A	N	2935	9	2.50943	182.668	447.734	445.882	8.91704	139.538	1053.31	5.56164	7.11941	51.1343	3.81343	20.3147	7.50605	3.20357	26.2942		88.9041		139.567		204.813		9801.08		154.895	158.095	69.53	15.22	2.34	4.04	3.59	26.68	95.8	8.31	1.56	6.14	2.09	10.64	27.11	0.71
JR13304_gr5_4@178.ais	Reimink et al. (2020)	JR13-304	Slave	Acasta GC	Igneous_plutonic	N/A	N	2935	9	3.88936	143.677	446.147	94.0405	26.894	94.9952	1231.13	7.57617	8.56362	108.831	13.7258	73.6056	21.3686	8.23714	51.6628		114.083		151.557		210.076		9761.14		162.802	174.236	69.53	15.22	2.34	4.04	3.59	26.68	95.8	8.31	1.56	6.14	2.09	10.64	27.11	0.71
JR13304_gr8_1@179.ais	Reimink et al. (2020)	JR13-304	Slave	Acasta GC	Igneous_plutonic	N/A	N	2935	9	6.63336	52.8298	450.114	86.7481	20.4658	58.8103	1733.37	9.53277	30.843	211.397	36.5578	212.173	50.5654	23.8573	92.1053		174.289		223.658		303.865		8958.75		222.665	241.264	69.53	15.22	2.34	4.04	3.59	26.68	95.8	8.31	1.56	6.14	2.09	10.64	27.11	0.71
JR13304_gr9_1@180.ais	Reimink et al. (2020)	JR13-304	Slave	Acasta GC	Igneous_plutonic	N/A	N	2935	9	2.16716	12.409	442.576	24.8125	8.83487	15.256	1333.27	6.45799	1.94995	41.5352	2.18417	11.4277	4.38186	2.08868	23.9081		105.449		184.072		271.611		9483.36		206.672	207.019	69.53	15.22	2.34	4.04	3.59	26.68	95.8	8.31	1.56	6.14	2.09	10.64	27.11	0.71
JR16304_gr19_1@183.ais	Reimink et al. (2020)	JR13-304	Slave	Acasta GC	Igneous_plutonic	N/A	N	2935	9	5.51851	22.4455	70.8148	38.913	4.27383	23.9758	359.417	5.05347	1.30014	15.5542	2.11886	12.0043	3.77061	1.26522	8.38497		22.7171		50.9752		142.14		10769.3		32.1223	264.207	69.53	15.22	2.34	4.04	3.59	26.68	95.8	8.31	1.56	6.14	2.09	10.64	27.11	0.71
JR16304_gr19_2@184.ais	Reimink et al. (2020)	JR13-304	Slave	Acasta GC	Igneous_plutonic	N/A	N	2935	9	2.59213	77.1564	90.5224	69.395	12.8618	26.2693	514.22	24.4625	5.19288	39.0932	7.75913	38.3906	11.6657	5.07685	22.4874		43.9757		64.0533		147.441		10089.4		30.1861	173.209	69.53	15.22	2.34	4.04	3.59	26.68	95.8	8.31	1.56	6.14	2.09	10.64	27.11	0.71
JR16304_gr24_1@185.ais	Reimink et al. (2020)	JR13-304	Slave	Acasta GC	Igneous_plutonic	N/A	Y	2935	9	4.84655	4.98766	153.412	10.7497	4.33393	20.2271	863.317	4.62326	0.305097	13.9394	0.402439	3.29128	2.09733	0.914447	13.1927		61.7826		119.124		220.156		9723.02		103.814	314.438	69.53	15.22	2.34	4.04	3.59	26.68	95.8	8.31	1.56	6.14	2.09	10.64	27.11	0.71
JR16304_gr24_2@186.ais	Reimink et al. (2020)	JR13-304	Slave	Acasta GC	Igneous_plutonic	N/A	N	2935	9	7.54418	535.237	227.749	114.015	9.65599	205.749	600.759	7.14317	5.48024	37.8135	4.50166	19.8716	7.31949	4.59174	17.2732		50.2137		96.1436		186.539		9238.95		78.5531	174.213	69.53	15.22	2.34	4.04	3.59	26.68	95.8	8.31	1.56	6.14	2.09	10.64	27.11	0.71
JR16304_gr24_3@187.ais	Reimink et al. (2020)	JR13-304	Slave	Acasta GC	Igneous_plutonic	N/A	N	2935	9	3.98335	83.7666	82.3909	40.6234	4.05467	60.7199	693.584	4.8479	1.31776	18.8639	1.74575	11.0805	3.55786	2.39928	9.4544		38.1071		101.143		241.34		9549.99		64.6715	329.714	69.53	15.22	2.34	4.04	3.59	26.68	95.8	8.31	1.56	6.14	2.09	10.64	27.11	0.71
JR16304_gr25_1@188.ais	Reimink et al. (2020)	JR13-304	Slave	Acasta GC	Igneous_plutonic	N/A	N	2935	9	14.8011	218.007	262.189	297.286	23.6426	120.497	1546.55	36.4286	23.8375	188.729	25.9408	155.118	45.4105	27.9451	87.3927		133.094		203.328		339.252		8353.15		154.706	289.597	69.53	15.22	2.34	4.04	3.59	26.68	95.8	8.31	1.56	6.14	2.09	10.64	27.11	0.71
JR16304_gr25_2@189.ais	Reimink et al. (2020)	JR13-304	Slave	Acasta GC	Igneous_plutonic	N/A	N	2935	9	8.62569	59.4418	469.575	1131.59	13.9618	5411.1	1049.51	8.44079	3.9238	34.15	3.25368	16.2864	6.33127	2.36024	17.8303		73.2661		144.51		262.458		8818.75		116.352	245.837	69.53	15.22	2.34	4.04	3.59	26.68	95.8	8.31	1.56	6.14	2.09	10.64	27.11	0.71
JR16304_gr25_3@190.ais	Reimink et al. (2020)	JR13-304	Slave	Acasta GC	Igneous_plutonic	N/A	N	2935	9	8.89178	2926.44	10536.3	1897.52	8.97928	99.5004	479.495	4.25435	38.695	86.2251	13.8152	48.0794	7.64091	2.28883	14.9605		40.9782		64.2733		132.252		11326.2		52.7216	194.703	69.53	15.22	2.34	4.04	3.59	26.68	95.8	8.31	1.56	6.14	2.09	10.64	27.11	0.71
JR16304_gr25_4@191.ais	Reimink et al. (2020)	JR13-304	Slave	Acasta GC	Igneous_plutonic	N/A	N	2935	9	6.32239	363.483	280.371	39.9093	9.52195	143.349	1150.92	4.76333	13.7487	40.6538	3.02487	12.5819	4.71406	1.67268	27.7823		115.391		176.942		249.279		10288.5		200.011	179.088	69.53	15.22	2.34	4.04	3.59	26.68	95.8	8.31	1.56	6.14	2.09	10.64	27.11	0.71
JR16304_gr41_1@196.ais	Reimink et al. (2020)	JR13-304	Slave	Acasta GC	Igneous_plutonic	N/A	Y	2935	9	3.21135	0.0961855	59.9679	1.45647	1.20774	11.595	365.085	3.23623	0.0251506	2.94635	0.00931208	0.0948842	0.366655	0.159063	2.60315		18.1527		54.0832		152.523		9962.2		23.0438	125.372	69.53	15.22	2.34	4.04	3.59	26.68	95.8	8.31	1.56	6.14	2.09	10.64	27.11	0.71
JR16304_gr47_1@192.ais	Reimink et al. (2020)	JR13-304	Slave	Acasta GC	Igneous_plutonic	N/A	Y	2935	9	3.62372	0.227078	67.9592	0.723592	1.3989	13.5835	422.416	3.22798	0.0247747	3.5636	0.0135965	0.0840121	0.435225	0.152964	2.6864		19.8212		60.4193		161.777		9691.09		27.1403	155.055	69.53	15.22	2.34	4.04	3.59	26.68	95.8	8.31	1.56	6.14	2.09	10.64	27.11	0.71
JR16304_gr47_2@193.ais	Reimink et al. (2020)	JR13-304	Slave	Acasta GC	Igneous_plutonic	N/A	Y	2935	9	2.44759	6.66647	92.6519	5.0634	2.72976	16.6093	518.198	4.31519	0.158293	5.33307	0.0737669	0.292131	0.5524	0.193777	3.76785		26.8397		77.6257		191.86		8893.91		52.5297	199.907	69.53	15.22	2.34	4.04	3.59	26.68	95.8	8.31	1.56	6.14	2.09	10.64	27.11	0.71
JR16304_gr47_3@194.ais	Reimink et al. (2020)	JR13-304	Slave	Acasta GC	Igneous_plutonic	N/A	N	2935	9	8.3643	65.0029	175.981	215.73	9.69268	28.2334	501.334	6.06366	6.22591	56.3082	8.11389	41.2941	9.44545	4.17749	20.0366		40.0288		61.2586		112.965		8902.7		60.3399	99.7133	69.53	15.22	2.34	4.04	3.59	26.68	95.8	8.31	1.56	6.14	2.09	10.64	27.11	0.71
JR16304_gr48_1@195.ais	Reimink et al. (2020)	JR13-304	Slave	Acasta GC	Igneous_plutonic	N/A	N	2935	9	1.77042	739.185	344.525	218.935	6.92771	50.781	756.341	3.55858	0.902105	18.8935	0.362975	3.30003	2.24964	1.01081	14.1163		59.9363		97.2184		144.903		7875.58		51.5521	65.7674	69.53	15.22	2.34	4.04	3.59	26.68	95.8	8.31	1.56	6.14	2.09	10.64	27.11	0.71
JR16304_gr51_1@197.ais	Reimink et al. (2020)	JR13-304	Slave	Acasta GC	Igneous_plutonic	N/A	N	2935	9	1.99089	59.4025	58.0787	51.7515	5.66783	16.1138	483.79	4.11823	4.57532	47.22	6.04952	38.6951	9.9897	6.39182	19.0612		34.6453		61.1976		157.148		10482.8		19.4698	119.41	69.53	15.22	2.34	4.04	3.59	26.68	95.8	8.31	1.56	6.14	2.09	10.64	27.11	0.71
JR16304_gr60_1@198.ais	Reimink et al. (2020)	JR13-304	Slave	Acasta GC	Igneous_plutonic	N/A	Y	2935	9	9.42867	12.1724	86.2338	15.4765	2.8284	38.5354	453.452	5.00002	0.238901	5.51462	0.265807	1.36506	0.575618	0.288482	3.62808		22.3726		67.5363		184.737		10690.6		49.6199	684.168	69.53	15.22	2.34	4.04	3.59	26.68	95.8	8.31	1.56	6.14	2.09	10.64	27.11	0.71
JR16304_gr9_2@181.ais	Reimink et al. (2020)	JR13-304	Slave	Acasta GC	Igneous_plutonic	N/A	Y	2935	9	5.49122	6.13065	685.915	6.46954	5.83636	19.5099	1125.56	4.0917	0.401853	26.3143	0.4514	3.64489	2.75033	1.24294	20.5693		97.0381		167.438		249.142		8613.69		181.03	176.748	69.53	15.22	2.34	4.04	3.59	26.68	95.8	8.31	1.56	6.14	2.09	10.64	27.11	0.71
JR16304_gr9_2@182.ais	Reimink et al. (2020)	JR13-304	Slave	Acasta GC	Igneous_plutonic	N/A	N	2935	9	2.97549	11.3858	473.859	20.8353	8.7482	15.6619	1247.82	5.09389	1.44148	38.5118	1.63992	9.06852	4.04653	1.76979	23.0338		99.2136		167.853		242.608		9387.89		197.923	174.221	69.53	15.22	2.34	4.04	3.59	26.68	95.8	8.31	1.56	6.14	2.09	10.64	27.11	0.71
Z2965-07-01	Shan et al. (2015)	Z2965-07	N China	Jiaobei	Igneous_plutonic	N/A	Y	2418	10							264.09		0.066	4.2	0.052	0.36	0.62	0.394	3.74	1.489	18.8	7.97	40.76	10.04	116.96	27.22			22.17	525.92	62.7933	15.366	4.07814	4.12849	1.85278	14.2	19	4.3	1.23	3.54	1.18	3.45	0.22	0.21
Z2965-07-02	Shan et al. (2015)	Z2965-07	N China	Jiaobei	Igneous_plutonic	N/A	Y	2489	16							737.3		0.408	16.92	0.273	2.63	4.06	1.52	18.97	6.17	67.54	24.37	107.69	23.11	231.64	46.68			70.66	117.64	62.7933	15.366	4.07814	4.12849	1.85278	14.2	19	4.3	1.23	3.54	1.18	3.45	0.22	0.21
Z2965-07-03	Shan et al. (2015)	Z2965-07	N China	Jiaobei	Igneous_plutonic	N/A	Y	2492	14							866.21		0.088	32.11	0.128	2.14	4.37	2.16	21.73	6.63	73.83	27.16	122.28	26.92	280.94	59.78			119.27	186.29	62.7933	15.366	4.07814	4.12849	1.85278	14.2	19	4.3	1.23	3.54	1.18	3.45	0.22	0.21
Z2965-07-04	Shan et al. (2015)	Z2965-07	N China	Jiaobei	Igneous_plutonic	N/A	Y	2451	10							576.65		0.05	23.85	0.044	0.88	2.13	0.509	11.42	3.88	47.04	18.5	88.29	20.52	219.83	46.53			256.38	432.47	62.7933	15.366	4.07814	4.12849	1.85278	14.2	19	4.3	1.23	3.54	1.18	3.45	0.22	0.21
Z2965-07-05	Shan et al. (2015)	Z2965-07	N China	Jiaobei	Igneous_plutonic	N/A	Y	2443	32							330.4		0.057	17.14	0.041	0.57	1.45	0.328	6.3	2.22	27.05	10.3	50.07	11.54	118.62	24.49			30.93	43.22	62.7933	15.366	4.07814	4.12849	1.85278	14.2	19	4.3	1.23	3.54	1.18	3.45	0.22	0.21
Z2965-07-06	Shan et al. (2015)	Z2965-07	N China	Jiaobei	Igneous_plutonic	N/A	Y	2382	16							819.42		0.064	21.24	0.233	4.02	6.5	1.94	26.28	7.73	79.81	28.03	118.43	23.83	225.28	43.83			92.37	130.87	62.7933	15.366	4.07814	4.12849	1.85278	14.2	19	4.3	1.23	3.54	1.18	3.45	0.22	0.21
Z2965-07-07	Shan et al. (2015)	Z2965-07	N China	Jiaobei	Igneous_plutonic	N/A	Y	2443	10							742.3		0.05	64.32	0.128	1.94	2.83	1.54	13.38	4.32	50.46	20.43	103.73	25.47	290.22	65.42			248.54	375.3	62.7933	15.366	4.07814	4.12849	1.85278	14.2	19	4.3	1.23	3.54	1.18	3.45	0.22	0.21
Z2965-07-08	Shan et al. (2015)	Z2965-07	N China	Jiaobei	Igneous_plutonic	N/A	Y	2452	18							1334.72		0.048	55.27	0.232	4.17	8.06	3.89	35.08	11.68	125.35	44.67	193.97	41.12	406.77	80.07			77.02	122.97	62.7933	15.366	4.07814	4.12849	1.85278	14.2	19	4.3	1.23	3.54	1.18	3.45	0.22	0.21
Z2965-07-09	Shan et al. (2015)	Z2965-07	N China	Jiaobei	Igneous_plutonic	N/A	Y	2529	30							451.46		0.071	23.77	0.043	0.64	1.44	0.18	8.62	3.11	37.71	14.83	68.94	15.24	156.73	30.86			41.91	39.74	62.7933	15.366	4.07814	4.12849	1.85278	14.2	19	4.3	1.23	3.54	1.18	3.45	0.22	0.21
Z2965-07-10	Shan et al. (2015)	Z2965-07	N China	Jiaobei	Igneous_plutonic	N/A	N	2491	16							508.14		4.26	27.56	1.93	9.85	3.86	0.941	12.52	3.62	41.92	16.37	76.93	17.58	182.93	38.87			77.85	126.53	62.7933	15.366	4.07814	4.12849	1.85278	14.2	19	4.3	1.23	3.54	1.18	3.45	0.22	0.21
Z2965-07-11	Shan et al. (2015)	Z2965-07	N China	Jiaobei	Igneous_plutonic	N/A	N	2490	32							671.38		8.89	34.93	4.48	24.94	7.52	0.68	17.06	5.19	57.56	22.47	103.87	22.7	229.59	46.47			27.57	55.89	62.7933	15.366	4.07814	4.12849	1.85278	14.2	19	4.3	1.23	3.54	1.18	3.45	0.22	0.21
Z2965-07-12	Shan et al. (2015)	Z2965-07	N China	Jiaobei	Igneous_plutonic	N/A	Y	2395	24							456.15		0.049	4.23	0.057	0.49	1.27	0.607	7.44	2.81	34.74	15	72.61	16.84	178.27	39.33			30.36	75.78	62.7933	15.366	4.07814	4.12849	1.85278	14.2	19	4.3	1.23	3.54	1.18	3.45	0.22	0.21
Z2965-07-13	Shan et al. (2015)	Z2965-07	N China	Jiaobei	Igneous_plutonic	N/A	Y	2439	16							646.36		0.078	29.79	0.284	4.34	6.34	1.4	22.03	6.05	61.21	21.32	92.16	19.21	186.58	37.16			111.25	117.69	62.7933	15.366	4.07814	4.12849	1.85278	14.2	19	4.3	1.23	3.54	1.18	3.45	0.22	0.21
Z2965-07-14	Shan et al. (2015)	Z2965-07	N China	Jiaobei	Igneous_plutonic	N/A	N	2461	20							766.79		1.168	18.01	0.906	6.35	6.06	1.77	23.96	7.23	71.72	25.62	109.26	22.63	226.76	45.06			65.38	107.6	62.7933	15.366	4.07814	4.12849	1.85278	14.2	19	4.3	1.23	3.54	1.18	3.45	0.22	0.21
Z2965-07-15	Shan et al. (2015)	Z2965-07	N China	Jiaobei	Igneous_plutonic	N/A	N	2448	12							780.21		16.16	67.96	9.24	48.84	14.99	1.7	31.22	7.92	77.61	26.93	113.32	22.13	211.1	41.29			203.7	221.79	62.7933	15.366	4.07814	4.12849	1.85278	14.2	19	4.3	1.23	3.54	1.18	3.45	0.22	0.21
Z2965-07-16	Shan et al. (2015)	Z2965-07	N China	Jiaobei	Igneous_plutonic	N/A	Y	2489	18							618.31		0.056	40.92	0.24	4.16	5.61	1.19	20.56	5.68	58.38	20.56	87.94	18.31	176.26	34.23			140.97	121.74	62.7933	15.366	4.07814	4.12849	1.85278	14.2	19	4.3	1.23	3.54	1.18	3.45	0.22	0.21
Z2965-07-17	Shan et al. (2015)	Z2965-07	N China	Jiaobei	Igneous_plutonic	N/A	Y	2482	18							559.04		0.047	16.57	0.125	2.21	3.03	0.99	12.81	4.07	45.46	18	84.75	19.03	200.68	42.76			91.1	145.92	62.7933	15.366	4.07814	4.12849	1.85278	14.2	19	4.3	1.23	3.54	1.18	3.45	0.22	0.21
Z2965-07-18	Shan et al. (2015)	Z2965-07	N China	Jiaobei	Igneous_plutonic	N/A	Y	2487	18							451.38		0.073	13.63	0.08	1.25	2.21	1.18	10.17	3.07	34.7	13.97	67.14	15.42	171.39	38.72			43.98	110.72	62.7933	15.366	4.07814	4.12849	1.85278	14.2	19	4.3	1.23	3.54	1.18	3.45	0.22	0.21
Z2965-07-19	Shan et al. (2015)	Z2965-07	N China	Jiaobei	Igneous_plutonic	N/A	Y	2479	20							1080.08		0.064	10.41	0.176	3.62	6.78	1.09	32.7	10.43	111.15	39	160.86	30.23	267.7	49.44			58.35	92.41	62.7933	15.366	4.07814	4.12849	1.85278	14.2	19	4.3	1.23	3.54	1.18	3.45	0.22	0.21
Z2965-07-20	Shan et al. (2015)	Z2965-07	N China	Jiaobei	Igneous_plutonic	N/A	N	2502	14							1079		1.374	41.01	1.086	11.21	11.43	2.2	36.63	10.15	102.37	35.91	153.71	31.27	300.1	59.39			187.94	160.7	62.7933	15.366	4.07814	4.12849	1.85278	14.2	19	4.3	1.23	3.54	1.18	3.45	0.22	0.21
Z2965-07-21	Shan et al. (2015)	Z2965-07	N China	Jiaobei	Igneous_plutonic	N/A	Y	2490	14							1841.71		0.057	11.54	0.257	4.2	6.88	1.54	35.95	12.73	156	62.5	272.42	53.6	492.04	93.32			150.49	187.6	62.7933	15.366	4.07814	4.12849	1.85278	14.2	19	4.3	1.23	3.54	1.18	3.45	0.22	0.21
Z2965-07-22	Shan et al. (2015)	Z2965-07	N China	Jiaobei	Igneous_plutonic	N/A	Y	2426	28							307.88		0.051	6.27	0.041	0.46	0.88	0.345	4.31	1.659	21.54	9.51	48.77	12.53	142.84	33.56			53.62	635.7	62.7933	15.366	4.07814	4.12849	1.85278	14.2	19	4.3	1.23	3.54	1.18	3.45	0.22	0.21
Z2965-07-23	Shan et al. (2015)	Z2965-07	N China	Jiaobei	Igneous_plutonic	N/A	Y	2497	10							1115.18		0.167	54.91	0.23	4.01	7.81	3.53	32.51	9.6	98.41	35.94	157.19	32.87	334.03	67.69			436.93	381.23	62.7933	15.366	4.07814	4.12849	1.85278	14.2	19	4.3	1.23	3.54	1.18	3.45	0.22	0.21
Z2965-07-24	Shan et al. (2015)	Z2965-07	N China	Jiaobei	Igneous_plutonic	N/A	Y	2456	10							312.15		0.059	13.09	0.039	0.36	0.95	0.26	5.36	1.98	24.33	10.06	50.15	11.45	131.22	29.28			155.11	926.91	62.7933	15.366	4.07814	4.12849	1.85278	14.2	19	4.3	1.23	3.54	1.18	3.45	0.22	0.21
Z2965-12-01	Shan et al. (2015)	Z2965-12	N China	Jiaobei	Igneous_plutonic	N/A	Y	2446	16							1457.93		0.462	46.84	0.372	4.47	8.01	2.81	36.17	11.63	137.53	49.43	219.35	48.34	471.56	86.31			147.08	259.49	65.0275	16.1861	3.66993	4.53939	1.73892	14.2	59.4	8.83	2.15	5.39	0.96	4.09	5.97	0.51
Z2965-12-02	Shan et al. (2015)	Z2965-12	N China	Jiaobei	Igneous_plutonic	N/A	N	2409	10							133.23		0.066	2.01	0.047	0.35	0.64	0.297	5.65	2.06	18.58	4.14	11.6	1.89	16.11	2.79			16.53	568.66	65.0275	16.1861	3.66993	4.53939	1.73892	14.2	59.4	8.83	2.15	5.39	0.96	4.09	5.97	0.51
Z2965-12-03	Shan et al. (2015)	Z2965-12	N China	Jiaobei	Igneous_plutonic	N/A	Y	2431	30							865.92		0.052	17.99	0.045	1.01	3.91	0.507	17.02	6.49	78.39	29.74	133.09	28.47	272.59	49.08			80.09	72.5	65.0275	16.1861	3.66993	4.53939	1.73892	14.2	59.4	8.83	2.15	5.39	0.96	4.09	5.97	0.51
Z2965-12-04	Shan et al. (2015)	Z2965-12	N China	Jiaobei	Igneous_plutonic	N/A	N	2441	16							728.09		0.047	37.51	0.233	3.9	5.84	1.26	22.58	6.71	68.14	23.6	104.99	23.16	228.27	43.37			181.9	217.88	65.0275	16.1861	3.66993	4.53939	1.73892	14.2	59.4	8.83	2.15	5.39	0.96	4.09	5.97	0.51
Z2965-12-05	Shan et al. (2015)	Z2965-12	N China	Jiaobei	Igneous_plutonic	N/A	Y	2423	32							610.04		0.042	13.94	0.046	0.91	1.98	0.391	11.66	4.44	53.78	20.77	93.99	20.91	205.31	37.57			59.44	57.77	65.0275	16.1861	3.66993	4.53939	1.73892	14.2	59.4	8.83	2.15	5.39	0.96	4.09	5.97	0.51
Z2965-12-06	Shan et al. (2015)	Z2965-12	N China	Jiaobei	Igneous_plutonic	N/A	Y	2449	12							426.37		0.052	17.82	0.052	0.81	1.65	0.511	8.85	2.86	33.8	13.46	64.98	14.96	156.76	31.27			52.98	402.95	65.0275	16.1861	3.66993	4.53939	1.73892	14.2	59.4	8.83	2.15	5.39	0.96	4.09	5.97	0.51
Z2965-12-07	Shan et al. (2015)	Z2965-12	N China	Jiaobei	Igneous_plutonic	N/A	Y	2427	30							386.84		0.058	9.05	0.058	1.12	1.96	0.82	8.44	2.87	32.63	12.56	58.78	13.47	142.5	30.15			24.51	45.29	65.0275	16.1861	3.66993	4.53939	1.73892	14.2	59.4	8.83	2.15	5.39	0.96	4.09	5.97	0.51
Z2965-12-08	Shan et al. (2015)	Z2965-12	N China	Jiaobei	Igneous_plutonic	N/A	Y	2486	14							1052.57		0.048	7.06	0.052	0.94	2.6	0.297	16.21	6.38	85.46	35.12	166.67	37.33	368.02	71.21			105.14	328.91	65.0275	16.1861	3.66993	4.53939	1.73892	14.2	59.4	8.83	2.15	5.39	0.96	4.09	5.97	0.51
Z2965-12-09	Shan et al. (2015)	Z2965-12	N China	Jiaobei	Igneous_plutonic	N/A	N	2480	14							868.06		5.97	35.43	2.24	10.82	5.52	0.93	24.04	7.9	85.59	29.88	123.73	25.43	239.02	42.84			172.66	223.39	65.0275	16.1861	3.66993	4.53939	1.73892	14.2	59.4	8.83	2.15	5.39	0.96	4.09	5.97	0.51
Z2965-12-10	Shan et al. (2015)	Z2965-12	N China	Jiaobei	Igneous_plutonic	N/A	Y	2452	64							633.34		0.061	34.67	0.207	3.85	6.04	1.31	20.78	5.81	59.88	20.57	91.27	19.79	200.64	38.09			143.39	164.17	65.0275	16.1861	3.66993	4.53939	1.73892	14.2	59.4	8.83	2.15	5.39	0.96	4.09	5.97	0.51
Z2965-12-11	Shan et al. (2015)	Z2965-12	N China	Jiaobei	Igneous_plutonic	N/A	Y	2442	40							435.81		0.06	10.62	0.039	0.56	1.23	0.28	9.01	3.15	38.16	14.49	66.39	14.96	144.89	27.71			33.44	37.18	65.0275	16.1861	3.66993	4.53939	1.73892	14.2	59.4	8.83	2.15	5.39	0.96	4.09	5.97	0.51
Z2965-12-12	Shan et al. (2015)	Z2965-12	N China	Jiaobei	Igneous_plutonic	N/A	Y	2489	28							378.26		0.048	11.29	0.049	0.65	1.5	0.227	7.64	2.74	32.7	12.45	57.69	12.61	125.52	23.5			44.45	47.59	65.0275	16.1861	3.66993	4.53939	1.73892	14.2	59.4	8.83	2.15	5.39	0.96	4.09	5.97	0.51
Z2965-12-13	Shan et al. (2015)	Z2965-12	N China	Jiaobei	Igneous_plutonic	N/A	Y	2508	12							313.6		0.062	17.5	0.069	1.15	1.72	0.632	8.08	2.64	28.4	9.76	43.78	9.87	103.02	21.82			85.36	444.26	65.0275	16.1861	3.66993	4.53939	1.73892	14.2	59.4	8.83	2.15	5.39	0.96	4.09	5.97	0.51
Z2965-12-14	Shan et al. (2015)	Z2965-12	N China	Jiaobei	Igneous_plutonic	N/A	N	2516	16							342.08		0.045	15.62	0.055	0.62	1.28	0.496	6.69	2.23	27.24	10.12	48.66	11.74	134.12	29.03			58.17	247.54	65.0275	16.1861	3.66993	4.53939	1.73892	14.2	59.4	8.83	2.15	5.39	0.96	4.09	5.97	0.51
Z2965-12-15	Shan et al. (2015)	Z2965-12	N China	Jiaobei	Igneous_plutonic	N/A	Y	2554	26							499.34		0.064	23.79	0.109	2.05	3.45	0.712	14.05	4.25	46.22	16.45	71.94	15.03	146.79	28.31			79.47	78.31	65.0275	16.1861	3.66993	4.53939	1.73892	14.2	59.4	8.83	2.15	5.39	0.96	4.09	5.97	0.51
Z2965-12-16	Shan et al. (2015)	Z2965-12	N China	Jiaobei	Igneous_plutonic	N/A	Y	2521	8							131.64		0.055	1.98	0.056	0.51	0.42	0.271	2.74	0.988	11.05	3.99	17.82	3.97	41.3	8.79			7.31	1003.31	65.0275	16.1861	3.66993	4.53939	1.73892	14.2	59.4	8.83	2.15	5.39	0.96	4.09	5.97	0.51
Z2965-12-17	Shan et al. (2015)	Z2965-12	N China	Jiaobei	Igneous_plutonic	N/A	Y	2563	34							620.67		0.065	12.59	0.051	0.93	2.44	0.397	11.26	4.25	52.19	20.65	96.25	21.1	210.99	40.66			51.02	30.38	65.0275	16.1861	3.66993	4.53939	1.73892	14.2	59.4	8.83	2.15	5.39	0.96	4.09	5.97	0.51
Z2965-12-18	Shan et al. (2015)	Z2965-12	N China	Jiaobei	Igneous_plutonic	N/A	Y	2484	10							362.2		0.045	7.43	0.041	0.53	1.28	0.34	7.83	2.86	33.05	11.93	51.87	11.6	114.29	22.37			41.16	499.78	65.0275	16.1861	3.66993	4.53939	1.73892	14.2	59.4	8.83	2.15	5.39	0.96	4.09	5.97	0.51
Z2965-12-19	Shan et al. (2015)	Z2965-12	N China	Jiaobei	Igneous_plutonic	N/A	Y	2501	28							773.12		0.079	15.35	0.092	1.67	3.59	1.31	16.54	5.54	64.45	24.74	114.64	26.01	269.07	55.66			39.44	72.94	65.0275	16.1861	3.66993	4.53939	1.73892	14.2	59.4	8.83	2.15	5.39	0.96	4.09	5.97	0.51
Z2965-12-20	Shan et al. (2015)	Z2965-12	N China	Jiaobei	Igneous_plutonic	N/A	N	2366	50							969.08		0.75	15.78	0.226	2.36	4.15	0.97	18.89	6.62	78.8	31.38	147.02	32.81	339.66	68.55			140.1	203.89	65.0275	16.1861	3.66993	4.53939	1.73892	14.2	59.4	8.83	2.15	5.39	0.96	4.09	5.97	0.51
Z2965-12-21	Shan et al. (2015)	Z2965-12	N China	Jiaobei	Igneous_plutonic	N/A	N	2492	12							437.88		18.69	87.41	9.15	47.93	13.21	1.052	19.81	4.38	40.83	14.31	62.55	14.17	150.14	30.92			196.34	274.37	65.0275	16.1861	3.66993	4.53939	1.73892	14.2	59.4	8.83	2.15	5.39	0.96	4.09	5.97	0.51
Z2965-31-01	Shan et al. (2015)	Z2965-31	N China	Jiaobei	Igneous_plutonic	N/A	Y	2408	12							357.41		0.051	32.58	0.059	0.97	2.04	0.963	9.27	2.8	29.86	10.82	49.6	12.16	132.9	25.1			87.91	158.45	67.8351	15.7303	2.54268	5.31743	2.53259	3.79	33.9	2.78	1.29	1.57	0.27	4.18	13.7	0.25
Z2965-31-02	Shan et al. (2015)	Z2965-31	N China	Jiaobei	Igneous_plutonic	N/A	Y	2558	10							566.02		0.033	51.13	0.096	1.89	3.78	1.75	16.21	4.76	49.45	17.36	75.85	17.74	189.16	35.71			277.68	401.9	67.8351	15.7303	2.54268	5.31743	2.53259	3.79	33.9	2.78	1.29	1.57	0.27	4.18	13.7	0.25
Z2965-31-03	Shan et al. (2015)	Z2965-31	N China	Jiaobei	Igneous_plutonic	N/A	N	2488	34							576.85		0.765	52.56	0.304	2.45	3.68	1.67	16.36	4.76	49.87	17.65	78.69	18.54	199.88	37.14			228.4	350.52	67.8351	15.7303	2.54268	5.31743	2.53259	3.79	33.9	2.78	1.29	1.57	0.27	4.18	13.7	0.25
Z2965-31-04	Shan et al. (2015)	Z2965-31	N China	Jiaobei	Igneous_plutonic	N/A	Y	2690	18							168.56		0.028	25.9	0.053	0.88	1.4	0.27	5.54	1.526	15.53	5.12	21.68	5.26	54.8	9.92			120.47	45.4	67.8351	15.7303	2.54268	5.31743	2.53259	3.79	33.9	2.78	1.29	1.57	0.27	4.18	13.7	0.25
Z2965-31-05	Shan et al. (2015)	Z2965-31	N China	Jiaobei	Igneous_plutonic	N/A	Y	2191	138							163.69		0.03	26.51	0.051	0.79	1.51	0.261	5.62	1.512	14.64	4.87	21.03	4.96	52.2	9.64			147.83	47.41	67.8351	15.7303	2.54268	5.31743	2.53259	3.79	33.9	2.78	1.29	1.57	0.27	4.18	13.7	0.25
Z2965-31-06	Shan et al. (2015)	Z2965-31	N China	Jiaobei	Igneous_plutonic	N/A	N	2516	36							449.91		1.233	52.91	0.45	3.34	3.65	1.516	14.6	4.05	40.13	13.67	59.08	13.7	144.27	26.58			313.12	392.62	67.8351	15.7303	2.54268	5.31743	2.53259	3.79	33.9	2.78	1.29	1.57	0.27	4.18	13.7	0.25
Z2965-31-07	Shan et al. (2015)	Z2965-31	N China	Jiaobei	Igneous_plutonic	N/A	N	2552	10							456.34		2.25	54.45	0.77	4.77	3.86	1.66	15.02	4.14	41.37	14.16	61.52	14.08	150.88	27.75			267.51	366.28	67.8351	15.7303	2.54268	5.31743	2.53259	3.79	33.9	2.78	1.29	1.57	0.27	4.18	13.7	0.25
Z2965-31-08	Shan et al. (2015)	Z2965-31	N China	Jiaobei	Igneous_plutonic	N/A	Y	2421	14							268.27		0.077	30.39	0.07	0.95	1.63	0.853	7.46	2.28	23.67	8.25	35.71	8.78	97.03	17.54			109.84	187.02	67.8351	15.7303	2.54268	5.31743	2.53259	3.79	33.9	2.78	1.29	1.57	0.27	4.18	13.7	0.25
Z2965-31-09	Shan et al. (2015)	Z2965-31	N China	Jiaobei	Igneous_plutonic	N/A	Y	2112	20							173.01		0.04	27.25	0.061	1.02	1.54	0.254	5.65	1.577	15.59	5.28	22.66	5.27	55.3	10.12			127.7	60	67.8351	15.7303	2.54268	5.31743	2.53259	3.79	33.9	2.78	1.29	1.57	0.27	4.18	13.7	0.25
Z2965-31-10	Shan et al. (2015)	Z2965-31	N China	Jiaobei	Igneous_plutonic	N/A	Y	2413	18							157.86		0.028	26.19	0.056	0.84	1.5	0.247	5.16	1.491	14.22	4.83	20.29	4.77	51.32	9.34			126.04	48.67	67.8351	15.7303	2.54268	5.31743	2.53259	3.79	33.9	2.78	1.29	1.57	0.27	4.18	13.7	0.25
Z2965-31-11	Shan et al. (2015)	Z2965-31	N China	Jiaobei	Igneous_plutonic	N/A	N	2546	10							381.67		6.05	53.62	2.46	11.34	3.22	0.999	9.06	2.59	27.34	10.57	50.85	13.05	151.34	32.15			180.64	306.62	67.8351	15.7303	2.54268	5.31743	2.53259	3.79	33.9	2.78	1.29	1.57	0.27	4.18	13.7	0.25
Z2965-31-12	Shan et al. (2015)	Z2965-31	N China	Jiaobei	Igneous_plutonic	N/A	Y	2548	10							317.51		0.0144	35.63	0.052	1.07	2.07	0.946	9.02	2.65	27	9.44	42.37	10.23	111.63	21.55			193.13	305.82	67.8351	15.7303	2.54268	5.31743	2.53259	3.79	33.9	2.78	1.29	1.57	0.27	4.18	13.7	0.25
Z2965-31-13	Shan et al. (2015)	Z2965-31	N China	Jiaobei	Igneous_plutonic	N/A	N	2485	32							193.15		53.36	185.89	22.61	100.15	16.35	1.483	12.83	2.102	16.56	5.44	24.53	6.22	75.19	16.34			125.22	312.45	67.8351	15.7303	2.54268	5.31743	2.53259	3.79	33.9	2.78	1.29	1.57	0.27	4.18	13.7	0.25
Z2965-31-14	Shan et al. (2015)	Z2965-31	N China	Jiaobei	Igneous_plutonic	N/A	Y	2465	34							581.16		0.062	54.47	0.081	1.83	3.48	1.626	16.24	4.66	50.27	17.45	79.08	18.44	196.56	37.47			191.36	310.27	67.8351	15.7303	2.54268	5.31743	2.53259	3.79	33.9	2.78	1.29	1.57	0.27	4.18	13.7	0.25
Z2965-31-15	Shan et al. (2015)	Z2965-31	N China	Jiaobei	Igneous_plutonic	N/A	Y	2555	34							246.02		0.026	29.18	0.038	0.73	1.55	0.679	6.38	1.882	19.47	7.1	32.8	8.27	94.49	19.21			156.8	283.6	67.8351	15.7303	2.54268	5.31743	2.53259	3.79	33.9	2.78	1.29	1.57	0.27	4.18	13.7	0.25
Z2965-31-16	Shan et al. (2015)	Z2965-31	N China	Jiaobei	Igneous_plutonic	N/A	Y	2568	10							341.8		0.028	39.02	0.049	1.14	2.19	0.952	9.29	2.77	28.6	10.12	46.11	10.87	119.55	23.82			230.52	335.46	67.8351	15.7303	2.54268	5.31743	2.53259	3.79	33.9	2.78	1.29	1.57	0.27	4.18	13.7	0.25
Z2965-31-17	Shan et al. (2015)	Z2965-31	N China	Jiaobei	Igneous_plutonic	N/A	Y	2517	38							652.95		0.039	60.25	0.112	2.16	3.76	1.8	18.62	5.35	57.1	20.01	89.38	20.53	217.08	42.35			346.13	442.04	67.8351	15.7303	2.54268	5.31743	2.53259	3.79	33.9	2.78	1.29	1.57	0.27	4.18	13.7	0.25
Z2965-31-18	Shan et al. (2015)	Z2965-31	N China	Jiaobei	Igneous_plutonic	N/A	N	2566	10							467.92		1.599	49.77	1.029	5.98	3.71	1.297	13.19	3.72	39.46	14.06	64.51	15.29	165.84	31.65			185.82	307.65	67.8351	15.7303	2.54268	5.31743	2.53259	3.79	33.9	2.78	1.29	1.57	0.27	4.18	13.7	0.25
Z2965-31-19	Shan et al. (2015)	Z2965-31	N China	Jiaobei	Igneous_plutonic	N/A	Y	2425	36							570.79		0.074	44.03	0.14	2.6	4.44	1.88	17.49	5.02	51.78	17.96	78.79	18.35	195.34	36.87			171.84	256.39	67.8351	15.7303	2.54268	5.31743	2.53259	3.79	33.9	2.78	1.29	1.57	0.27	4.18	13.7	0.25
Z2965-31-20	Shan et al. (2015)	Z2965-31	N China	Jiaobei	Igneous_plutonic	N/A	Y	2524	10							634.64		0.1	41.43	0.198	3.11	5.19	2.13	19.8	5.59	56.16	19.64	86.78	20.07	214.72	41.25			170.81	275.29	67.8351	15.7303	2.54268	5.31743	2.53259	3.79	33.9	2.78	1.29	1.57	0.27	4.18	13.7	0.25
Z2965-31-21	Shan et al. (2015)	Z2965-31	N China	Jiaobei	Igneous_plutonic	N/A	Y	2579	10							466.11		0.025	37.73	0.07	1.15	2.37	1.151	11.61	3.43	36.89	13.5	63.8	15.32	170.31	34.32			155.58	278.32	67.8351	15.7303	2.54268	5.31743	2.53259	3.79	33.9	2.78	1.29	1.57	0.27	4.18	13.7	0.25
Z2965-31-22	Shan et al. (2015)	Z2965-31	N China	Jiaobei	Igneous_plutonic	N/A	Y	2570	10							471.19		0.058	42.85	0.049	1.51	2.84	1.169	12.56	3.66	39.39	14	63.61	15.23	164.42	32.73			226.09	347.54	67.8351	15.7303	2.54268	5.31743	2.53259	3.79	33.9	2.78	1.29	1.57	0.27	4.18	13.7	0.25
Z2965-35-01	Shan et al. (2015)	Z2965-35	N China	Jiaobei	Igneous_plutonic	N/A	Y	2509	38							629.02		0.053	73.93	0.13	2.65	5.12	2.28	21.64	5.96	58.84	19.63	82.4	17.89	181.2	34.93			520.5	505.91	66.4123	15.8129	3.30238	5.18656	3.30238	7.36	38.2	4.88	1.55	2.9	0.48	3.81	0.51	0.24
Z2965-35-02	Shan et al. (2015)	Z2965-35	N China	Jiaobei	Igneous_plutonic	N/A	N	2467	10							477.86		2.04	40.4	0.729	3.79	2.87	1.145	11.74	3.52	38.22	14.11	66.28	15.59	170.05	34.99			115.63	212.15	66.4123	15.8129	3.30238	5.18656	3.30238	7.36	38.2	4.88	1.55	2.9	0.48	3.81	0.51	0.24
Z2965-35-03	Shan et al. (2015)	Z2965-35	N China	Jiaobei	Igneous_plutonic	N/A	Y	2467	10							631.93		0.039	51.77	0.079	1.56	3.37	1.5	16.48	5.04	53.41	19.23	86.37	19.94	209.97	41.44			190.05	283.42	66.4123	15.8129	3.30238	5.18656	3.30238	7.36	38.2	4.88	1.55	2.9	0.48	3.81	0.51	0.24
Z2965-35-04	Shan et al. (2015)	Z2965-35	N China	Jiaobei	Igneous_plutonic	N/A	Y	2430	34							676.4		0.246	48.04	0.112	1.74	3.33	1.615	16.37	5.06	55.95	20.92	95.12	21.99	235.05	46.16			203.66	337.08	66.4123	15.8129	3.30238	5.18656	3.30238	7.36	38.2	4.88	1.55	2.9	0.48	3.81	0.51	0.24
Z2965-35-05	Shan et al. (2015)	Z2965-35	N China	Jiaobei	Igneous_plutonic	N/A	Y	2526	10							606.9		0.146	45.68	0.125	1.7	3.4	1.423	15.24	4.55	50.46	18.41	83.35	19.45	212.37	41.9			153.37	267.12	66.4123	15.8129	3.30238	5.18656	3.30238	7.36	38.2	4.88	1.55	2.9	0.48	3.81	0.51	0.24
Z2965-35-06	Shan et al. (2015)	Z2965-35	N China	Jiaobei	Igneous_plutonic	N/A	Y	2494	16							306.6		0.019	29.91	0.093	1.54	2.65	0.456	10.28	2.69	27.69	9.28	39.6	9.06	95.49	17.89			191.34	63.3	66.4123	15.8129	3.30238	5.18656	3.30238	7.36	38.2	4.88	1.55	2.9	0.48	3.81	0.51	0.24
Z2965-35-07	Shan et al. (2015)	Z2965-35	N China	Jiaobei	Igneous_plutonic	N/A	N	2508	10							756.58		29.03	150.04	10.6	47.88	11.95	2.44	24.87	6.41	66.1	23.09	101.81	23.07	246.89	46.96			278.38	389.3	66.4123	15.8129	3.30238	5.18656	3.30238	7.36	38.2	4.88	1.55	2.9	0.48	3.81	0.51	0.24
Z2965-35-08	Shan et al. (2015)	Z2965-35	N China	Jiaobei	Igneous_plutonic	N/A	Y	2477	10							399.78		0.034	42.32	0.064	1.29	2.8	1.164	11.76	3.41	33.7	12.23	54.24	12.44	131.46	25.81			254.08	363.02	66.4123	15.8129	3.30238	5.18656	3.30238	7.36	38.2	4.88	1.55	2.9	0.48	3.81	0.51	0.24
Z2965-35-09	Shan et al. (2015)	Z2965-35	N China	Jiaobei	Igneous_plutonic	N/A	Y	2457	36							540.92		0.033	52.65	0.074	1.83	3.22	1.46	15.55	4.54	46.71	16.48	73.28	17.03	179.89	33.67			223.08	323.24	66.4123	15.8129	3.30238	5.18656	3.30238	7.36	38.2	4.88	1.55	2.9	0.48	3.81	0.51	0.24
Z2965-35-10	Shan et al. (2015)	Z2965-35	N China	Jiaobei	Igneous_plutonic	N/A	Y	2509	10							569.84		0.022	36.84	0.058	1.52	2.93	1.49	14.7	4.33	45.83	17.44	80.4	19.48	211.45	41.43			112.68	242.32	66.4123	15.8129	3.30238	5.18656	3.30238	7.36	38.2	4.88	1.55	2.9	0.48	3.81	0.51	0.24
Z2965-35-11	Shan et al. (2015)	Z2965-35	N China	Jiaobei	Igneous_plutonic	N/A	N	2507	18							238.99		0.032	28.99	0.081	1.44	2.31	0.397	7.98	2.17	21.5	7.23	30.92	7.26	76.74	13.84			146.69	53	66.4123	15.8129	3.30238	5.18656	3.30238	7.36	38.2	4.88	1.55	2.9	0.48	3.81	0.51	0.24
Z2965-35-12	Shan et al. (2015)	Z2965-35	N China	Jiaobei	Igneous_plutonic	N/A	Y	2418	40							358.81		0.055	29.55	0.072	1.21	2.39	1.136	10.18	2.86	30.79	10.98	49.99	12.05	132.3	25.4			83.19	147.33	66.4123	15.8129	3.30238	5.18656	3.30238	7.36	38.2	4.88	1.55	2.9	0.48	3.81	0.51	0.24
Z2965-35-13	Shan et al. (2015)	Z2965-35	N China	Jiaobei	Igneous_plutonic	N/A	Y	2505	10							610.68		0.039	45.31	0.076	1.55	3.69	1.508	15.58	4.75	50.35	18.45	84.2	19.66	210.13	41.05			143.27	254.02	66.4123	15.8129	3.30238	5.18656	3.30238	7.36	38.2	4.88	1.55	2.9	0.48	3.81	0.51	0.24
Z2965-35-14	Shan et al. (2015)	Z2965-35	N China	Jiaobei	Igneous_plutonic	N/A	Y	2450	10							626.69		0.065	56.48	0.113	1.93	4.02	1.8	17.98	5.03	54.83	19.48	85.82	20.11	210.57	40.78			273.72	347.21	66.4123	15.8129	3.30238	5.18656	3.30238	7.36	38.2	4.88	1.55	2.9	0.48	3.81	0.51	0.24
Z2965-35-15	Shan et al. (2015)	Z2965-35	N China	Jiaobei	Igneous_plutonic	N/A	Y	2494	10							509.49		0.237	62.9	0.278	2.68	4.36	1.9	17.5	4.83	46.79	15.73	66.11	14.81	151	28.1			409.22	432.28	66.4123	15.8129	3.30238	5.18656	3.30238	7.36	38.2	4.88	1.55	2.9	0.48	3.81	0.51	0.24
Z2965-35-16	Shan et al. (2015)	Z2965-35	N China	Jiaobei	Igneous_plutonic	N/A	Y	2447	10							498.13		0.037	34.83	0.046	1.1	2.61	1.19	12.11	3.63	40.69	15.12	69.55	16.89	183.87	36.18			127.07	235.13	66.4123	15.8129	3.30238	5.18656	3.30238	7.36	38.2	4.88	1.55	2.9	0.48	3.81	0.51	0.24
Z2965-35-17	Shan et al. (2015)	Z2965-35	N China	Jiaobei	Igneous_plutonic	N/A	Y	2466	38							428.61		0.178	31.85	0.106	1.32	2.32	1.03	10.16	3.08	33.78	12.56	58.69	14.39	162.08	32.56			111.33	215.31	66.4123	15.8129	3.30238	5.18656	3.30238	7.36	38.2	4.88	1.55	2.9	0.48	3.81	0.51	0.24
Z2965-35-18	Shan et al. (2015)	Z2965-35	N China	Jiaobei	Igneous_plutonic	N/A	N	2488	10							591.88		10.38	92.69	6.89	34.07	9.46	1.91	18.59	4.96	50.94	18.04	80.38	18.92	202.05	39.16			172.58	274.17	66.4123	15.8129	3.30238	5.18656	3.30238	7.36	38.2	4.88	1.55	2.9	0.48	3.81	0.51	0.24
C2a-01	This study	JB17-C2a	Kaapvaal	S Barberton	Igneous_plutonic	Core	N	3484	37	79.4	32.9	890	1410	8.02921		443.946	0.80425	6.6	23.4	2.38	12.8	5	1.89	13.9	3.72	40.6	14.67	66.7	15.05	151.9	28.78	10130	0.313	34.4	91.1	70.0732	15.8266	3.16553	5.58664	1.0501	6.02563	16.6662	2.1697	0.670125	1.80542	0.450774	3.45324	3.54078	0.619669
C2a-02	This study	JB17-C2a	Kaapvaal	S Barberton	Igneous_plutonic	Rim	Y	3452	35	97.5	4.5	127.3	-177	2.77767		516.346	1.00425	0.071	10.64	0.07	0.8	2.17	0.521	10.14	3.4	40.6	16.14	75	17.62	174.3	36.47	9780	0.543	54.9	145.4	70.0732	15.8266	3.16553	5.58664	1.0501	6.02563	16.6662	2.1697	0.670125	1.80542	0.450774	3.45324	3.54078	0.619669
C2a-03	This study	JB17-C2a	Kaapvaal	S Barberton	Igneous_plutonic	Rim	N	3479	29	99.9	16.4	86.6	-40	11.74		459.246	1.49425	3.56	18.3	1.93	12.85	6.64	3.03	16.03	4.02	41.8	15.01	67	14.54	145.4	28.63	10900	0.506	50	129.9	70.0732	15.8266	3.16553	5.58664	1.0501	6.02563	16.6662	2.1697	0.670125	1.80542	0.450774	3.45324	3.54078	0.619669
C2a-04	This study	JB17-C2a	Kaapvaal	S Barberton	Igneous_plutonic	Core	N	3451	28	110.9	30.4	182.6	-118	20.29		883.946	2.81425	5.13	34.1	4.34	33.1	16.2	6.55	31.9	7.6	79.2	28.9	129.4	28.5	271.7	53.1	9420	0.619	96.5	206	70.0732	15.8266	3.16553	5.58664	1.0501	6.02563	16.6662	2.1697	0.670125	1.80542	0.450774	3.45324	3.54078	0.619669
C2a-05	This study	JB17-C2a	Kaapvaal	S Barberton	Igneous_plutonic	Rim	N	3462	39	140.5	151	207	280	51.9729		844.946	4.55425	11.85	83.9	10.54	93.9	36.4	12.99	47.8	8.23	75.1	26.92	118.5	25.47	239.2	47.6	9210	0.89	97.9	210.5	70.0732	15.8266	3.16553	5.58664	1.0501	6.02563	16.6662	2.1697	0.670125	1.80542	0.450774	3.45324	3.54078	0.619669
C2a-06	This study	JB17-C2a	Kaapvaal	S Barberton	Igneous_plutonic	Core	Y	3472	30	126.4	1.9	193	-9	2.96213		508.946	0.74425	0.0085	9.39	0.043	0.733	1.75	0.444	10.66	3.62	43.3	16.48	77	17.9	180.1	34.9	9880	0.418	53.6	140.5	70.0732	15.8266	3.16553	5.58664	1.0501	6.02563	16.6662	2.1697	0.670125	1.80542	0.450774	3.45324	3.54078	0.619669
C2a-07	This study	JB17-C2a	Kaapvaal	S Barberton	Igneous_plutonic	Rim	N	3461	31	150.7	12.7	152.5	140	10.5248		747.946	2.23425	2.6	28.3	1.96	14.4	6.26	3.08	20.1	5.78	66.3	24.54	110	25.65	248.7	46.9	9800	0.743	121.6	248.7	70.0732	15.8266	3.16553	5.58664	1.0501	6.02563	16.6662	2.1697	0.670125	1.80542	0.450774	3.45324	3.54078	0.619669
C2a-08	This study	JB17-C2a	Kaapvaal	S Barberton	Igneous_plutonic	Core	N	3462	29	127	45.9	204	160	14.5394		741.946	1.79425	5.55	34.8	4.16	27.4	11.42	13.72	26	6.73	68.9	24.04	105.2	24.08	231.6	45.2	9690	0.489	82.2	170.8	70.0732	15.8266	3.16553	5.58664	1.0501	6.02563	16.6662	2.1697	0.670125	1.80542	0.450774	3.45324	3.54078	0.619669
C2a-09	This study	JB17-C2a	Kaapvaal	S Barberton	Igneous_plutonic	Rim	N	3450	28	119.9	14	176.5	-110	10.8503		759.946	1.94425	2.47	29.8	1.52	11.7	6.17	2.44	18.56	5.54	62.4	24.79	112.6	25.27	245	49.24	9260	0.73	81.5	193.9	70.0732	15.8266	3.16553	5.58664	1.0501	6.02563	16.6662	2.1697	0.670125	1.80542	0.450774	3.45324	3.54078	0.619669
C2a-10	This study	JB17-C2a	Kaapvaal	S Barberton	Igneous_plutonic	Core	Y	3464	30	132.4	17.5	189	56	3.91695		664.946	1.06725	0.037	11.84	0.076	1.25	2.7	0.749	14.39	4.77	56	22.03	101.3	22.99	225	44	9500	0.566	67.1	162.3	70.0732	15.8266	3.16553	5.58664	1.0501	6.02563	16.6662	2.1697	0.670125	1.80542	0.450774	3.45324	3.54078	0.619669
C2a-11	This study	JB17-C2a	Kaapvaal	S Barberton	Igneous_plutonic	Core	Y	3454	29	125.7	3.6	168.8	29	3.7759		775.946	1.53425	0.64	15.96	0.346	3.19	3.56	0.997	17.75	5.71	66.9	25.91	118.5	25.91	253.2	49.46	9420	0.596	85.9	192.5	70.0732	15.8266	3.16553	5.58664	1.0501	6.02563	16.6662	2.1697	0.670125	1.80542	0.450774	3.45324	3.54078	0.619669
C2a-12	This study	JB17-C2a	Kaapvaal	S Barberton	Igneous_plutonic	Core	N	3464	34	125.4	366	314	320	377.59		1492.95	23.3643	55.6	206	42.4	266	131	54.1	162.5	26.6	180.6	48.1	171	34.21	299.8	54.8	8660	0.75	144.9	230.1	70.0732	15.8266	3.16553	5.58664	1.0501	6.02563	16.6662	2.1697	0.670125	1.80542	0.450774	3.45324	3.54078	0.619669
C2a-14	This study	JB17-C2a	Kaapvaal	S Barberton	Igneous_plutonic	Core	N	3462	35	174.5	209	198	120	59.0255		1478.95	7.60425	45.5	208	26.5	176	70.6	30.4	99	16.2	137.1	44.3	185.9	39.9	380	68	10190	1.26	154.3	325.8	70.0732	15.8266	3.16553	5.58664	1.0501	6.02563	16.6662	2.1697	0.670125	1.80542	0.450774	3.45324	3.54078	0.619669
C2a-15	This study	JB17-C2a	Kaapvaal	S Barberton	Igneous_plutonic	Core	N	3481	45	102.2	481	670	250	275.597		1482.95	18.8643	100	529	76.3	497	159	71.3	184	26.2	160	41.3	145	27.8	237	46.5	8510	0.62	285.1	221.5	70.0732	15.8266	3.16553	5.58664	1.0501	6.02563	16.6662	2.1697	0.670125	1.80542	0.450774	3.45324	3.54078	0.619669
C2a-16	This study	JB17-C2a	Kaapvaal	S Barberton	Igneous_plutonic	Core	Y	3469	33	118.5	6.8	152.3	40	6.47762		721.946	1.75425	0.305	15.92	0.33	2.72	3.16	1.06	15.64	5.25	60.9	24.01	111.5	25.46	248.6	47.4	10250	0.692	76.6	182.1	70.0732	15.8266	3.16553	5.58664	1.0501	6.02563	16.6662	2.1697	0.670125	1.80542	0.450774	3.45324	3.54078	0.619669
C2a-17	This study	JB17-C2a	Kaapvaal	S Barberton	Igneous_plutonic	Core	N	3463	28	150.7	7	640	1290	9.00573		644.946	1.17425	1.37	13.3	0.8	7.2	5.5	1.57	17.3	5.27	56.6	21.4	96.1	22.01	223.2	43.9	9710	0.319	75.3	182.5	70.0732	15.8266	3.16553	5.58664	1.0501	6.02563	16.6662	2.1697	0.670125	1.80542	0.450774	3.45324	3.54078	0.619669
C2a-19	This study	JB17-C2a	Kaapvaal	S Barberton	Igneous_plutonic	Core	Y	3463	34	30.1	0.6	52.2	70	1.62754		236.546	0.47425	0.22	8.48	0.08	0.71	0.59	0.283	4.29	1.44	18.5	7.63	37.1	9.07	98.3	18.92	12790	0.509	26.7	102.6	70.0732	15.8266	3.16553	5.58664	1.0501	6.02563	16.6662	2.1697	0.670125	1.80542	0.450774	3.45324	3.54078	0.619669
C2a-20	This study	JB17-C2a	Kaapvaal	S Barberton	Igneous_plutonic	Rim	N	3463	34	118.3	1296	1060	540	327.679		1566.95	22.6642	87.3	480	55.3	343	154	57.6	193	26.7	174.5	44.4	157.7	29.62	259.3	48.7	11030	0.838	117.5	212.2	70.0732	15.8266	3.16553	5.58664	1.0501	6.02563	16.6662	2.1697	0.670125	1.80542	0.450774	3.45324	3.54078	0.619669
C2a-21	This study	JB17-C2a	Kaapvaal	S Barberton	Igneous_plutonic	Core	Y	3459	28	121.8	2.8	240	66	5.28409		809.946	1.31425	0.11	15.68	0.139	1.95	3.6	1.07	19.33	5.96	70.7	26.54	121.8	26.92	259.7	49.7	9270	0.511	99.2	199.8	70.0732	15.8266	3.16553	5.58664	1.0501	6.02563	16.6662	2.1697	0.670125	1.80542	0.450774	3.45324	3.54078	0.619669
C2a-22	This study	JB17-C2a	Kaapvaal	S Barberton	Igneous_plutonic	Rim	N	3470	35	129.7	523	850	690	769.285		1770.95	22.8643	140.6	401	71.8	418	158	61.7	221	28.4	191.8	49.2	181.7	35.4	320	60	8810	0.88	123.2	227.6	70.0732	15.8266	3.16553	5.58664	1.0501	6.02563	16.6662	2.1697	0.670125	1.80542	0.450774	3.45324	3.54078	0.619669
C2a-23	This study	JB17-C2a	Kaapvaal	S Barberton	Igneous_plutonic	Core	Y	3466	29	103.9	-0.9	198	-240	3.61314		685.946	0.95425	0.09	11.4	0.111	1.56	2.94	0.98	16.27	5.43	59.6	22.8	101.5	23	218	41.5	9030	0.49	70.8	142.4	70.0732	15.8266	3.16553	5.58664	1.0501	6.02563	16.6662	2.1697	0.670125	1.80542	0.450774	3.45324	3.54078	0.619669
C2a-24	This study	JB17-C2a	Kaapvaal	S Barberton	Igneous_plutonic	Core	Y	3464	29	129.7	3.4	186.1	75	4.11226		720.946	1.46425	0.041	15.06	0.071	1.12	2.92	0.749	15.24	5.12	59.3	23.28	107.2	24.14	232.5	45.76	9410	0.603	90	179.7	70.0732	15.8266	3.16553	5.58664	1.0501	6.02563	16.6662	2.1697	0.670125	1.80542	0.450774	3.45324	3.54078	0.619669
C2a-25	This study	JB17-C2a	Kaapvaal	S Barberton	Igneous_plutonic	Core	N	3440	42	141.3	235	259	270	132.373		1415.95	9.16425	49.8	148	27.8	192	83.3	35.2	105.5	17.2	142.2	43.1	170	36.2	328.3	58.4	8540	0.63	143	227	70.0732	15.8266	3.16553	5.58664	1.0501	6.02563	16.6662	2.1697	0.670125	1.80542	0.450774	3.45324	3.54078	0.619669
C2a-26	This study	JB17-C2a	Kaapvaal	S Barberton	Igneous_plutonic	Core	N	3425	31	151.6	75	300	230	52.1899		1481.95	4.60425	21.6	85.7	9.6	57	22.9	8.7	49.7	13.11	136.2	48	202.8	42.4	377	70.1	8730	1.25	258.6	351.2	70.0732	15.8266	3.16553	5.58664	1.0501	6.02563	16.6662	2.1697	0.670125	1.80542	0.450774	3.45324	3.54078	0.619669
C2a-27	This study	JB17-C2a	Kaapvaal	S Barberton	Igneous_plutonic	Core	N	3472	30	109.6	46.3	185	110	11.2843		481.946	1.60425	4.14	22.8	3.19	22	7.35	7.66	15.5	3.86	40.2	15.7	72.4	16.5	164	31.7	9790	0.392	44	131	70.0732	15.8266	3.16553	5.58664	1.0501	6.02563	16.6662	2.1697	0.670125	1.80542	0.450774	3.45324	3.54078	0.619669
C2a-28	This study	JB17-C2a	Kaapvaal	S Barberton	Igneous_plutonic	Rim	N	3415	34	158.2	676	523	770	185.54		1351.95	11.2643	62.8	244	35.1	212	72.9	46.5	101.2	15.5	131.5	41.1	170.7	34.43	315	63.7	9870	1.29	152.8	315.2	70.0732	15.8266	3.16553	5.58664	1.0501	6.02563	16.6662	2.1697	0.670125	1.80542	0.450774	3.45324	3.54078	0.619669
C2a-29	This study	JB17-C2a	Kaapvaal	S Barberton	Igneous_plutonic	Core	N	3467	33	109	18.1	160.1	100	7.75795		607.946	1.22425	3.5	16.68	1.848	12.25	6.97	2.59	17.95	4.85	54.6	20.15	88.7	19.61	191.4	36.78	9110	0.364	63.1	126.1	70.0732	15.8266	3.16553	5.58664	1.0501	6.02563	16.6662	2.1697	0.670125	1.80542	0.450774	3.45324	3.54078	0.619669
C2a-30	This study	JB17-C2a	Kaapvaal	S Barberton	Igneous_plutonic	Rim	N	3461	40	153	673	194	890	419.906		1530.95	23.4642	124.5	399	61.9	393	161	66.8	199	25.6	154.6	37.6	134.7	25.59	227.6	43.7	11910	1.4	138	270.3	70.0732	15.8266	3.16553	5.58664	1.0501	6.02563	16.6662	2.1697	0.670125	1.80542	0.450774	3.45324	3.54078	0.619669
C2a-32	This study	JB17-C2a	Kaapvaal	S Barberton	Igneous_plutonic	Core	N	3410	34	123.2	72.3	311	270	20.8325		868.946	2.04425	6.87	32.7	4.56	29.2	11.5	5.36	27.8	7.43	79.2	29.08	131.9	28.38	276.2	52.9	9190	0.557	105	227.4	70.0732	15.8266	3.16553	5.58664	1.0501	6.02563	16.6662	2.1697	0.670125	1.80542	0.450774	3.45324	3.54078	0.619669
C2a-33	This study	JB17-C2a	Kaapvaal	S Barberton	Igneous_plutonic	Core	N	3459	42	91.6	510	196	800	25.6067		513.946	2.35425	12.2	89	8	55	25.6	9.8	39	6.3	45.3	15.4	64	13.3	133	25.2	9830	0.53	45.7	109	70.0732	15.8266	3.16553	5.58664	1.0501	6.02563	16.6662	2.1697	0.670125	1.80542	0.450774	3.45324	3.54078	0.619669
C2a-36	This study	JB17-C2a	Kaapvaal	S Barberton	Igneous_plutonic	Core	N	3466	28	106.9	61.8	173	140	10.6333		598.946	1.37425	17.3	40.6	10.3	65.8	25.5	8.9	34	5.73	52.2	18.6	83.5	18.21	182.1	35.5	9790	0.518	66.9	147.9	70.0732	15.8266	3.16553	5.58664	1.0501	6.02563	16.6662	2.1697	0.670125	1.80542	0.450774	3.45324	3.54078	0.619669
C2a-37	This study	JB17-C2a	Kaapvaal	S Barberton	Igneous_plutonic	Core	N	3453	37	148.5	284	398	210	73.6734		908.946	6.37425	18.3	89.4	12.5	79	32.9	19	51.4	10.17	90	30.5	128.2	29.7	290	52.1	10360	0.7	84.3	228.3	70.0732	15.8266	3.16553	5.58664	1.0501	6.02563	16.6662	2.1697	0.670125	1.80542	0.450774	3.45324	3.54078	0.619669
C2a-38	This study	JB17-C2a	Kaapvaal	S Barberton	Igneous_plutonic	Core	N	3438	32	169.7	222	237	420	87.7788		1073.95	4.31425	15.6	65.2	9.4	77	31.9	12.6	53	11.07	101.7	36.2	156	33.61	320	59.6	10330	0.73	130.7	245	70.0732	15.8266	3.16553	5.58664	1.0501	6.02563	16.6662	2.1697	0.670125	1.80542	0.450774	3.45324	3.54078	0.619669
C2a-39	This study	JB17-C2a	Kaapvaal	S Barberton	Igneous_plutonic	Rim	N	3459	41	91.3	247	1443	1540	58.3745		684.946	4.52425	19.5	62.9	9.43	58.5	24.4	10.84	38.2	7.9	65.7	22.77	97.2	20.3	194.1	37.94	8310	0.363	51.6	111.4	70.0732	15.8266	3.16553	5.58664	1.0501	6.02563	16.6662	2.1697	0.670125	1.80542	0.450774	3.45324	3.54078	0.619669
C2a-40	This study	JB17-C2a	Kaapvaal	S Barberton	Igneous_plutonic	Rim	N	3425	29	139.1	506	1010	1110	175.775		2048.95	13.3643	83.7	424	46.9	289	118	53.4	166	24.7	179.3	53.3	206.6	42.27	387.6	70.3	9560	1.003	169.4	302.4	70.0732	15.8266	3.16553	5.58664	1.0501	6.02563	16.6662	2.1697	0.670125	1.80542	0.450774	3.45324	3.54078	0.619669
C2d-01	This study	JB17-C2d	Kaapvaal	S Barberton	Igneous_plutonic	Core	N	3468	29	108.1	16.7	207	-30	6.22806		1418.95	1.06425	2.85	20.7	2.36	16.2	13.3	5.19	42.1	11.4	122	43.5	191	41.2	385	71	9020	0.7	154	205	60.4971	16.1354	6.0062	4.51229	0.554355	13.5718	11.7065	2.99791	1.12688	2.96666	1.10661	3.40174	1.53792	0.306582
C2d-02	This study	JB17-C2d	Kaapvaal	S Barberton	Igneous_plutonic	Core	Y	3467	31	85.1	-0.4	248.4	50	6.15211		1938.95	1.20425	0.025	10.31	0.158	4.34	9.16	2.26	53.1	16.8	180	62.4	247	48.8	411	66.1	8540	0.692	76.5	131.8	60.4971	16.1354	6.0062	4.51229	0.554355	13.5718	11.7065	2.99791	1.12688	2.96666	1.10661	3.40174	1.53792	0.306582
C2d-03	This study	JB17-C2d	Kaapvaal	S Barberton	Igneous_plutonic	Core	Y	3456	34	3.07	-2.3	83.5	40	4.94773		402.946	0.33125	0.007	2.92	0.065	0.84	1.72	0.721	8.59	2.92	35.4	13.46	63	15.66	170.5	33.46	10520	0.402	53.3	139.7	60.4971	16.1354	6.0062	4.51229	0.554355	13.5718	11.7065	2.99791	1.12688	2.96666	1.10661	3.40174	1.53792	0.306582
C2d-04	This study	JB17-C2d	Kaapvaal	S Barberton	Igneous_plutonic	Core	N	3457	28	97.6	0	353	190	6.53187		1482.95	1.47425	1.02	11.27	0.696	5.14	6.49	1.92	31.1	10.47	121.4	45.6	200.9	43.2	400	72.8	8590	0.78	99.1	192.5	60.4971	16.1354	6.0062	4.51229	0.554355	13.5718	11.7065	2.99791	1.12688	2.96666	1.10661	3.40174	1.53792	0.306582
C2d-05	This study	JB17-C2d	Kaapvaal	S Barberton	Igneous_plutonic	Core	Y	3460	27	160.3	33.8	178	-134	6.36912		534.946	0.66325	0.218	4.41	0.191	1.78	1.85	0.98	9.99	3.46	43.3	17.51	85	20.82	223.2	48.6	9700	0.49	92.5	229.4	60.4971	16.1354	6.0062	4.51229	0.554355	13.5718	11.7065	2.99791	1.12688	2.96666	1.10661	3.40174	1.53792	0.306582
C2d-06	This study	JB17-C2d	Kaapvaal	S Barberton	Igneous_plutonic	Core	Y	3458	31	84.3	10.6	161	140	4.19906		909.946	0.91425	0.79	11.3	0.67	7.3	5.99	3.83	25.9	7.86	90.9	32.8	137.1	29.53	279.5	49.6	10980	0.6	74.4	184.8	60.4971	16.1354	6.0062	4.51229	0.554355	13.5718	11.7065	2.99791	1.12688	2.96666	1.10661	3.40174	1.53792	0.306582
C2d-07	This study	JB17-C2d	Kaapvaal	S Barberton	Igneous_plutonic	Rim	N	3472	28	164.1	699	221	270	22.8941		1221.95	3.21425	1.52	18.2	1.3	11	7.06	4.38	22.1	7.29	93.5	40.1	189.4	43.1	418	85.1	9790	1.41	140.4	319	60.4971	16.1354	6.0062	4.51229	0.554355	13.5718	11.7065	2.99791	1.12688	2.96666	1.10661	3.40174	1.53792	0.306582
C2d-08	This study	JB17-C2d	Kaapvaal	S Barberton	Igneous_plutonic	Core	N	3461	29	121.2	24.1	287	-62	8.43067		1397.95	1.29425	1.57	17.25	1.3	10.51	9.59	3.51	34.6	10.83	120.7	43.6	188	41.2	381.5	67.5	8880	0.736	108.5	172.8	60.4971	16.1354	6.0062	4.51229	0.554355	13.5718	11.7065	2.99791	1.12688	2.96666	1.10661	3.40174	1.53792	0.306582
C2d-09	This study	JB17-C2d	Kaapvaal	S Barberton	Igneous_plutonic	Core	N	3470	33	107.4	356	355	130	17.7945		2468.95	2.36425	4.43	36	4.6	39.1	24.6	10	77.1	21.7	232	79	315	62.7	527	86.9	8530	1	213	231	60.4971	16.1354	6.0062	4.51229	0.554355	13.5718	11.7065	2.99791	1.12688	2.96666	1.10661	3.40174	1.53792	0.306582
C2d-10	This study	JB17-C2d	Kaapvaal	S Barberton	Igneous_plutonic	Rim	Y	3463	28	147.1	2	165.8	-91	5.29494		1208.95	0.94425	0.45	10.26	0.568	6.09	7.65	2.77	31.9	9.94	112.5	40.8	175.9	38.11	360.2	70.06	9060	0.613	154.3	256	60.4971	16.1354	6.0062	4.51229	0.554355	13.5718	11.7065	2.99791	1.12688	2.96666	1.10661	3.40174	1.53792	0.306582
C2d-11	This study	JB17-C2d	Kaapvaal	S Barberton	Igneous_plutonic	Core	N	3468	36	132.3	166	405	330	17.3605		2838.95	2.70425	23.6	150	17.8	117.2	52.7	26.7	99.7	25.1	267	88.2	356	71.5	606	105.9	8130	0.931	1090	366	60.4971	16.1354	6.0062	4.51229	0.554355	13.5718	11.7065	2.99791	1.12688	2.96666	1.10661	3.40174	1.53792	0.306582
C2d-12	This study	JB17-C2d	Kaapvaal	S Barberton	Igneous_plutonic	Core	N	3465	28	125.5	14.8	564	80	9.65675		3220.95	3.52425	1.48	30.3	1.71	14.7	17.4	6.16	77.6	25.22	290.1	100.6	408.1	83.3	703	115.8	8190	1.4	231	274.7	60.4971	16.1354	6.0062	4.51229	0.554355	13.5718	11.7065	2.99791	1.12688	2.96666	1.10661	3.40174	1.53792	0.306582
C2d-13	This study	JB17-C2d	Kaapvaal	S Barberton	Igneous_plutonic	Rim	N	3443	28	128.4	316	274	330	19.0965		1298.95	1.74425	12.7	96	13.2	101.3	63.2	36.2	81.4	14.2	115.4	39.7	173	38.9	397	76.7	9300	0.764	422	389	60.4971	16.1354	6.0062	4.51229	0.554355	13.5718	11.7065	2.99791	1.12688	2.96666	1.10661	3.40174	1.53792	0.306582
C2d-14	This study	JB17-C2d	Kaapvaal	S Barberton	Igneous_plutonic	Rim	N	3467	32	114.8	34.4	149.3	-140	3.12488		482.946	0.48025	4.2	30.9	3.41	21.2	11.6	5.2	16.7	3.7	39.5	14.96	71.7	17.29	181.9	41.67	10692	0.45	73.2	214.3	60.4971	16.1354	6.0062	4.51229	0.554355	13.5718	11.7065	2.99791	1.12688	2.96666	1.10661	3.40174	1.53792	0.306582
C2d-15	This study	JB17-C2d	Kaapvaal	S Barberton	Igneous_plutonic	Core	Y	3460	30	14.1	1.6	193	-94	4.55712		531.946	0.59425	0.038	4.41	0.067	0.71	1.36	0.571	8.09	2.95	38.8	17.38	88.5	22.39	246.2	53	8950	0.546	68.5	201.8	60.4971	16.1354	6.0062	4.51229	0.554355	13.5718	11.7065	2.99791	1.12688	2.96666	1.10661	3.40174	1.53792	0.306582
C2d-17	This study	JB17-C2d	Kaapvaal	S Barberton	Igneous_plutonic	Core	N	3452	31	104.3	1110	334	80	48.8263		1290.95	1.75425	1.042	13.25	0.907	7.18	8	2.54	34.8	10.55	122.6	43.5	185.9	39.6	342	62	6440	0.765	100.3	168.1	60.4971	16.1354	6.0062	4.51229	0.554355	13.5718	11.7065	2.99791	1.12688	2.96666	1.10661	3.40174	1.53792	0.306582
C2d-18	This study	JB17-C2d	Kaapvaal	S Barberton	Igneous_plutonic	Core	Y	3473	29	101.2	3.5	186.1	80	3.59144		671.946	0.81325	0.256	6.07	0.267	2.13	2.28	0.91	12.2	4.29	51.4	21.34	102.3	25.33	271.8	57.9	9010	0.448	96.1	231.3	60.4971	16.1354	6.0062	4.51229	0.554355	13.5718	11.7065	2.99791	1.12688	2.96666	1.10661	3.40174	1.53792	0.306582
C2d-19	This study	JB17-C2d	Kaapvaal	S Barberton	Igneous_plutonic	Core	N	3473	29	87.6	554	288	-60	16.7094		1899.95	1.98425	4.34	31.7	3.12	21.1	15.6	6.26	52.4	15.3	172	59.8	247	49.8	426	76.2	7140	0.84	145.6	190.9	60.4971	16.1354	6.0062	4.51229	0.554355	13.5718	11.7065	2.99791	1.12688	2.96666	1.10661	3.40174	1.53792	0.306582
C2d-20	This study	JB17-C2d	Kaapvaal	S Barberton	Igneous_plutonic	Core	N	3475	31	124.3	29.4	201	-10	6.51017		2075.95	1.79425	3.29	24.1	2.13	17.99	16.6	7.46	57.4	16.22	177.8	63.1	264	57.4	543	94.4	9470	0.945	243.9	308.2	60.4971	16.1354	6.0062	4.51229	0.554355	13.5718	11.7065	2.99791	1.12688	2.96666	1.10661	3.40174	1.53792	0.306582
C2d-21	This study	JB17-C2d	Kaapvaal	S Barberton	Igneous_plutonic	Core	N	3459	31	123.9	3140	111.6	280	31.8998		708.946	0.63425	0.86	8.26	0.533	4.07	4.21	1.61	19.6	5.95	65.8	23.9	102.7	23.7	229.3	44.7	9760	0.529	98.4	201	60.4971	16.1354	6.0062	4.51229	0.554355	13.5718	11.7065	2.99791	1.12688	2.96666	1.10661	3.40174	1.53792	0.306582
C2d-22	This study	JB17-C2d	Kaapvaal	S Barberton	Igneous_plutonic	Rim	N	3470	29	114.2	348	612	-110	36.3484		2228.95	2.35425	4.87	50.9	4.87	47.1	32.7	13.84	72.9	18.4	186	68.6	282	57.3	506	88.1	7740	1.14	275.8	238	60.4971	16.1354	6.0062	4.51229	0.554355	13.5718	11.7065	2.99791	1.12688	2.96666	1.10661	3.40174	1.53792	0.306582
C2d-23	This study	JB17-C2d	Kaapvaal	S Barberton	Igneous_plutonic	Core	Y	3453	29	99.7	18.6	357	-170	6.07616		1491.95	1.31425	0.453	10	0.5	4.75	6.44	2.65	32.77	11.07	128.9	46.4	194.2	40.3	351.1	59.84	8800	0.693	73.2	129	60.4971	16.1354	6.0062	4.51229	0.554355	13.5718	11.7065	2.99791	1.12688	2.96666	1.10661	3.40174	1.53792	0.306582
C2d-24	This study	JB17-C2d	Kaapvaal	S Barberton	Igneous_plutonic	Core	N	3468	30	66.1	42.3	327	60	12.1523		1977.95	2.18425	3.02	38.3	3.23	26	17.6	13.6	55.3	15.91	178	62.2	250	53.4	463	79.7	8620	0.911	176	226	60.4971	16.1354	6.0062	4.51229	0.554355	13.5718	11.7065	2.99791	1.12688	2.96666	1.10661	3.40174	1.53792	0.306582
C2d-25	This study	JB17-C2d	Kaapvaal	S Barberton	Igneous_plutonic	Rim	N	3459	35	166.9	7190	269	180	594.596		2058.95	2.61425	1.77	17.7	1.62	13.3	10.91	5.12	48.6	15.11	170	61.4	274	59.3	553	105	8140	1.08	248	344	60.4971	16.1354	6.0062	4.51229	0.554355	13.5718	11.7065	2.99791	1.12688	2.96666	1.10661	3.40174	1.53792	0.306582
C2d-26	This study	JB17-C2d	Kaapvaal	S Barberton	Igneous_plutonic	Core	Y	3466	27	137.5	104.2	260	20	5.8049		791.946	0.96425	0.129	7.78	0.143	1.99	2.53	1.128	13.42	4.93	62	25.7	122.3	30.9	318	63	8770	0.622	72.2	183	60.4971	16.1354	6.0062	4.51229	0.554355	13.5718	11.7065	2.99791	1.12688	2.96666	1.10661	3.40174	1.53792	0.306582
C2d-27	This study	JB17-C2d	Kaapvaal	S Barberton	Igneous_plutonic	Core	Y	3457	34	37.7	8.3	161.1	120	5.02368		494.946	0.72425	0.334	6.13	0.303	3.05	2.54	1.01	8.56	3.08	39.5	16.01	80.7	20.6	233.1	48.9	9460	0.44	78.9	188.8	60.4971	16.1354	6.0062	4.51229	0.554355	13.5718	11.7065	2.99791	1.12688	2.96666	1.10661	3.40174	1.53792	0.306582
C2d-28	This study	JB17-C2d	Kaapvaal	S Barberton	Igneous_plutonic	Core	Y	3459	30	117.4	3.9	213	-129	4.35096		620.946	0.67425	-0.001	5.26	0.04	0.83	1.53	0.693	9.41	3.71	47.5	20.2	99	24.8	262	53	9440	0.546	65	182.5	60.4971	16.1354	6.0062	4.51229	0.554355	13.5718	11.7065	2.99791	1.12688	2.96666	1.10661	3.40174	1.53792	0.306582
C2d-29	This study	JB17-C2d	Kaapvaal	S Barberton	Igneous_plutonic	Rim	N	3463	34	125	260	430	660	943.975		4588.95	5.38425	2.89	39.7	2.04	20.3	27.4	8.47	140	43.1	466.5	154.9	587	114.5	955	150.6	8490	1.62	263	335	60.4971	16.1354	6.0062	4.51229	0.554355	13.5718	11.7065	2.99791	1.12688	2.96666	1.10661	3.40174	1.53792	0.306582
C2d-30	This study	JB17-C2d	Kaapvaal	S Barberton	Igneous_plutonic	Core	N	3430	29	130.7	45.7	177	70	9.61335		652.946	1.07425	1.9	23.8	2.81	25.2	12.91	7.06	22.65	5.27	56.8	20.86	98.7	23.71	244.9	51.2	8770	0.59	147.5	219.5	60.4971	16.1354	6.0062	4.51229	0.554355	13.5718	11.7065	2.99791	1.12688	2.96666	1.10661	3.40174	1.53792	0.306582
C2d-31	This study	JB17-C2d	Kaapvaal	S Barberton	Igneous_plutonic	Rim	N	3475	33	159.2	755	134.3	270	13.3458		846.946	0.76425	1.19	8.91	1.01	7.84	5.89	2.48	20.1	5.95	71.7	28.07	127.8	29.6	293.6	63	9540	0.56	140.2	272	60.4971	16.1354	6.0062	4.51229	0.554355	13.5718	11.7065	2.99791	1.12688	2.96666	1.10661	3.40174	1.53792	0.306582
C2d-32	This study	JB17-C2d	Kaapvaal	S Barberton	Igneous_plutonic	Rim	N	3458	28	146.2	9.2	248	53	6.24976		812.946	1.12425	1.16	14	1.09	8.8	5.31	3.06	15.46	5.09	62.4	25.3	125.6	31.5	327	69.6	8390	0.669	125.9	256.6	60.4971	16.1354	6.0062	4.51229	0.554355	13.5718	11.7065	2.99791	1.12688	2.96666	1.10661	3.40174	1.53792	0.306582
C2d-33	This study	JB17-C2d	Kaapvaal	S Barberton	Igneous_plutonic	Core	Y	3464	33	160.2	13.4	156.3	15	4.88263		630.946	0.54425	0.293	10.4	0.338	5.1	5.8	1.79	40.2	10.62	111	40.88	158.1	33.12	280.7	51.2	9760	0.485	111.6	263.3	60.4971	16.1354	6.0062	4.51229	0.554355	13.5718	11.7065	2.99791	1.12688	2.96666	1.10661	3.40174	1.53792	0.306582
C2d-34	This study	JB17-C2d	Kaapvaal	S Barberton	Igneous_plutonic	Rim	Y	3476	28	34.8	6.2	172	156	3.89525		479.946	0.53925	0.037	3.84	0.057	0.93	1.49	0.549	8.39	3.04	39.3	15.25	74.5	18.26	194.3	40.39	9430	0.481	42.1	128	60.4971	16.1354	6.0062	4.51229	0.554355	13.5718	11.7065	2.99791	1.12688	2.96666	1.10661	3.40174	1.53792	0.306582
C2d-35	This study	JB17-C2d	Kaapvaal	S Barberton	Igneous_plutonic	Core	Y	3456	29	85.3	105	216	170	5.59875		572.946	0.66425	0.402	8.02	0.286	4.39	4.45	1.24	33.5	8.11	84	29.12	115.4	25.61	205.4	42.2	8290	0.418	54.3	115	60.4971	16.1354	6.0062	4.51229	0.554355	13.5718	11.7065	2.99791	1.12688	2.96666	1.10661	3.40174	1.53792	0.306582
C2d-36	This study	JB17-C2d	Kaapvaal	S Barberton	Igneous_plutonic	Rim	Y	3461	34	88.9	592	427	-10	12.4074		3438.95	2.38425	0.165	17.27	0.448	8.42	16.89	4.65	96.2	30	331	113.5	439	83.8	695	116.9	7760	1.08	171.8	228.7	60.4971	16.1354	6.0062	4.51229	0.554355	13.5718	11.7065	2.99791	1.12688	2.96666	1.10661	3.40174	1.53792	0.306582
C2d-37	This study	JB17-C2d	Kaapvaal	S Barberton	Igneous_plutonic	Core	N	3476	34	160.6	28.6	143.6	190	4.95858		762.946	0.77425	4.3	16.7	2.26	14.8	6.03	5	18.71	5.7	66.6	25.68	118.3	28.13	289	58.6	9880	0.549	154.8	359	60.4971	16.1354	6.0062	4.51229	0.554355	13.5718	11.7065	2.99791	1.12688	2.96666	1.10661	3.40174	1.53792	0.306582
C2d-38	This study	JB17-C2d	Kaapvaal	S Barberton	Igneous_plutonic	Core	Y	3471	28	145.3	24.9	143.8	-20	6.02191		671.946	0.63725	0.355	10.07	0.78	6.38	4.98	2.43	16.45	4.93	57	22	101.3	24.29	255.6	53.5	9430	0.535	124.4	247.2	60.4971	16.1354	6.0062	4.51229	0.554355	13.5718	11.7065	2.99791	1.12688	2.96666	1.10661	3.40174	1.53792	0.306582
C2d-39	This study	JB17-C2d	Kaapvaal	S Barberton	Igneous_plutonic	Rim	N	3454	28	64.1	40.3	142	32	5.15388		491.946	0.42925	4.51	28.2	3.8	28.5	16.26	8.27	24.8	4.45	42.9	15.89	72.2	16.87	174	38	10230	0.404	166.5	246.9	60.4971	16.1354	6.0062	4.51229	0.554355	13.5718	11.7065	2.99791	1.12688	2.96666	1.10661	3.40174	1.53792	0.306582
C2d-40	This study	JB17-C2d	Kaapvaal	S Barberton	Igneous_plutonic	Core	Y	3462	29	114.6	7.2	420	16	8.28962		3733.95	3.07425	0.378	27	0.643	9.91	19.12	4.78	104.1	32.54	352.5	121.9	476	92.5	765	126.8	8540	1.327	221.2	292.7	60.4971	16.1354	6.0062	4.51229	0.554355	13.5718	11.7065	2.99791	1.12688	2.96666	1.10661	3.40174	1.53792	0.306582
C5b-01	This study	JB17-C5b	Kaapvaal	S Barberton	Igneous_plutonic	Core	N	3281	38	149.7	684	103.1	3020	52.7324		1027.95	8.88425	26.2	213	27.1	157	72.2	16.2	78.6	12.66	99.5	31.65	139	29.96	298.9	59.1	11970	0.73	154.1	653	61.6932	18.306	5.0229	6.01231	1.81695	14.4616	18.9948	2.42232	0.651727	2.00915	0.848423	3.69071	4.92429	1.28462
C5b-03	This study	JB17-C5b	Kaapvaal	S Barberton	Igneous_plutonic	Core	N	3420	29	156.5	102.3	140.7	310	9.25529		873.946	2.17425	8.45	60	5.41	35.4	21.2	4.13	40.6	9.47	86.8	29.62	125.4	26.43	237.6	44.5	9550	0.623	93.6	278.7	61.6932	18.306	5.0229	6.01231	1.81695	14.4616	18.9948	2.42232	0.651727	2.00915	0.848423	3.69071	4.92429	1.28462
C5b-04	This study	JB17-C5b	Kaapvaal	S Barberton	Igneous_plutonic	Core	N	3259	30	205.6	682	230	2750	18.12		2488.95	7.86425	8.1	82.2	4.67	28.3	27.8	4.91	81.9	22.1	219	76.5	316	66.3	573	105.1	9970	2.2	561	739	61.6932	18.306	5.0229	6.01231	1.81695	14.4616	18.9948	2.42232	0.651727	2.00915	0.848423	3.69071	4.92429	1.28462
C5b-05	This study	JB17-C5b	Kaapvaal	S Barberton	Igneous_plutonic	Core	Y	3476	28	152.2	86	194	270	6.00375		1866.95	4.16425	0.46	23.3	0.89	8.37	10.28	2.12	43.6	13.86	156.4	59.6	252.4	53.3	482	87.1	8450	1.682	223.2	347	61.6932	18.306	5.0229	6.01231	1.81695	14.4616	18.9948	2.42232	0.651727	2.00915	0.848423	3.69071	4.92429	1.28462
C5b-06	This study	JB17-C5b	Kaapvaal	S Barberton	Igneous_plutonic	Core	N	3309	27	189.7	163.7	108.9	830	21.9176		897.946	4.50425	8	69.9	6.29	39.3	22.1	5.95	39.2	9.11	87.8	30.16	130.8	28.02	253.8	45.8	10230	0.93	230	463	61.6932	18.306	5.0229	6.01231	1.81695	14.4616	18.9948	2.42232	0.651727	2.00915	0.848423	3.69071	4.92429	1.28462
C5b-07	This study	JB17-C5b	Kaapvaal	S Barberton	Igneous_plutonic	Core	N	3259	33	191.3	240	179.6	930	12.8033		1268.95	4.14425	16.6	152	21.1	130	44.1	35.3	69.5	14.1	122	40.1	166	35.4	325	60.2	10400	2.91	176	456	61.6932	18.306	5.0229	6.01231	1.81695	14.4616	18.9948	2.42232	0.651727	2.00915	0.848423	3.69071	4.92429	1.28462
C5b-08	This study	JB17-C5b	Kaapvaal	S Barberton	Igneous_plutonic	Core	N	3361	31	166.3	574	159.7	2940	150.71		1222.95	9.39425	420	920	104.3	578	264	64.6	244.5	27.95	152.2	39.08	155.2	32.87	317.4	61.4	10970	0.722	806	495	61.6932	18.306	5.0229	6.01231	1.81695	14.4616	18.9948	2.42232	0.651727	2.00915	0.848423	3.69071	4.92429	1.28462
C5b-10	This study	JB17-C5b	Kaapvaal	S Barberton	Igneous_plutonic	Rim	N	3260	31	179.6	183	7700	21100	7.20459		1451.95	5.71425	7.6	48.6	4.84	29.5	18.9	2.92	52.3	14.17	142.9	47.9	197.2	40.5	355	59	9990	1.04	239.2	520	61.6932	18.306	5.0229	6.01231	1.81695	14.4616	18.9948	2.42232	0.651727	2.00915	0.848423	3.69071	4.92429	1.28462
C5b-11	This study	JB17-C5b	Kaapvaal	S Barberton	Igneous_plutonic	Core	N	3356	50	209.2	431	478	1340	44.1607		1455.95	5.02425	11.4	99	10.2	90	54.8	19.1	74.9	14.54	133.9	44.9	190.6	40.9	383	64.7	10070	0.891	226	478	61.6932	18.306	5.0229	6.01231	1.81695	14.4616	18.9948	2.42232	0.651727	2.00915	0.848423	3.69071	4.92429	1.28462
C5b-12	This study	JB17-C5b	Kaapvaal	S Barberton	Igneous_plutonic	Core	N	3446	32	149.7	136	150.2	250	11.7834		1263.95	10.3443	11.12	108	13.82	124.8	75.2	22.1	107.9	17.19	136.2	40.3	162.8	33.05	292.2	53.2	9430	0.56	123.7	275.8	61.6932	18.306	5.0229	6.01231	1.81695	14.4616	18.9948	2.42232	0.651727	2.00915	0.848423	3.69071	4.92429	1.28462
C5b-13	This study	JB17-C5b	Kaapvaal	S Barberton	Igneous_plutonic	Core	N	3233	32	150.9	26500	139	1890	10.5248		753.946	4.12425	17.34	66.5	6.77	37.2	19.3	14.31	35.2	7.37	70	23.84	106.7	23.4	227.9	44.7	6710	2.08	278.7	418	61.6932	18.306	5.0229	6.01231	1.81695	14.4616	18.9948	2.42232	0.651727	2.00915	0.848423	3.69071	4.92429	1.28462
C5b-14	This study	JB17-C5b	Kaapvaal	S Barberton	Igneous_plutonic	Core	N	3434	29	141.3	215	175	470	35.0464		1154.95	7.84425	13.8	125.4	19.7	160.8	66	19.8	76.3	12.65	110	38.2	165.8	36.5	327	59.9	9040	1.58	248	301	61.6932	18.306	5.0229	6.01231	1.81695	14.4616	18.9948	2.42232	0.651727	2.00915	0.848423	3.69071	4.92429	1.28462
C5b-15	This study	JB17-C5b	Kaapvaal	S Barberton	Igneous_plutonic	Core	N	3388	31	187.8	214	2510	7900	10.0908		1293.95	3.90425	20.1	146	17.5	103	43.5	22.8	66	14.33	122.2	40.3	168.4	36.7	337	58	10510	1.3	127.7	388	61.6932	18.306	5.0229	6.01231	1.81695	14.4616	18.9948	2.42232	0.651727	2.00915	0.848423	3.69071	4.92429	1.28462
C5b-16	This study	JB17-C5b	Kaapvaal	S Barberton	Igneous_plutonic	Core	N	3451	32	137.4	28.5	121	220	7.92071		656.946	6.06425	2.22	34.2	2.1	14.9	8.4	2.61	22.8	6.15	61.7	22	94.6	21.19	204.2	35.2	10160	0.312	65.3	213	61.6932	18.306	5.0229	6.01231	1.81695	14.4616	18.9948	2.42232	0.651727	2.00915	0.848423	3.69071	4.92429	1.28462
C5b-17	This study	JB17-C5b	Kaapvaal	S Barberton	Igneous_plutonic	Core	N	3429	30	194.9	93	226	140	18.337		1288.95	3.41425	9.3	72	5.8	39.1	26.6	4.86	56.4	14	124	40.8	170.3	36.47	326	59.2	9900	0.649	153	371	61.6932	18.306	5.0229	6.01231	1.81695	14.4616	18.9948	2.42232	0.651727	2.00915	0.848423	3.69071	4.92429	1.28462
C5b-18	This study	JB17-C5b	Kaapvaal	S Barberton	Igneous_plutonic	Core	N	3373	31	182.1	125	140.9	340	17.3062		1287.95	4.00425	5.85	71.3	5.64	49	50.4	15.38	99.8	16.74	130.3	40.2	161	33.5	302	52.3	9790	0.843	226.5	369.5	61.6932	18.306	5.0229	6.01231	1.81695	14.4616	18.9948	2.42232	0.651727	2.00915	0.848423	3.69071	4.92429	1.28462
C5b-20	This study	JB17-C5b	Kaapvaal	S Barberton	Igneous_plutonic	Rim	N	3105	33	183.6	441	109.2	3630	13.9969		979.946	4.52425	35.9	140	15.6	107.2	28.8	12.2	43.7	9.66	94.6	33.2	141.4	30	276	49.8	10700	1.73	295	702	61.6932	18.306	5.0229	6.01231	1.81695	14.4616	18.9948	2.42232	0.651727	2.00915	0.848423	3.69071	4.92429	1.28462
C5b-21	This study	JB17-C5b	Kaapvaal	S Barberton	Igneous_plutonic	Core	N	3413	35	157.8	102	172.8	560	32.7679		1168.95	5.01425	9.05	102.3	5.91	36.2	30	4.59	64.1	15.2	126.7	38.8	152.2	29.8	260	46.4	9640	0.9	189	383	61.6932	18.306	5.0229	6.01231	1.81695	14.4616	18.9948	2.42232	0.651727	2.00915	0.848423	3.69071	4.92429	1.28462
C5b-22	This study	JB17-C5b	Kaapvaal	S Barberton	Igneous_plutonic	Core	N	3423	29	183.5	116	158	530	27.6682		1295.95	3.20425	16.5	108	10	61.1	36	7.5	59	12.59	120.9	40.9	167.5	35.18	325.2	54.5	10040	0.732	160.2	355	61.6932	18.306	5.0229	6.01231	1.81695	14.4616	18.9948	2.42232	0.651727	2.00915	0.848423	3.69071	4.92429	1.28462
C5b-23	This study	JB17-C5b	Kaapvaal	S Barberton	Igneous_plutonic	Core	Y	3333	31	178.7	11.3	180	400	6.19551		1113.95	3.61425	0.187	22.82	0.116	1.82	4.3	1.216	29.6	9.81	110.5	38.32	166.4	34.02	296.1	52.98	9760	1.116	173.8	395	61.6932	18.306	5.0229	6.01231	1.81695	14.4616	18.9948	2.42232	0.651727	2.00915	0.848423	3.69071	4.92429	1.28462
C5b-24	This study	JB17-C5b	Kaapvaal	S Barberton	Igneous_plutonic	Rim	N	3037	29	155.4	1116	75.2	8700	20.507		1728.95	11.1143	14.2	93.7	7.19	39.1	29.1	4.92	60.5	14	133.2	47.1	216	48.6	475	82.6	12210	2.67	485	1118	61.6932	18.306	5.0229	6.01231	1.81695	14.4616	18.9948	2.42232	0.651727	2.00915	0.848423	3.69071	4.92429	1.28462
C5b-25	This study	JB17-C5b	Kaapvaal	S Barberton	Igneous_plutonic	Core	N	3446	31	159.1	41.8	137.7	160	18.771		884.946	3.37425	3.5	44.4	3.97	27.6	20.5	3.62	38.9	8.73	83.3	29.5	126.6	27.6	254	48.6	9890	0.561	87.5	235	61.6932	18.306	5.0229	6.01231	1.81695	14.4616	18.9948	2.42232	0.651727	2.00915	0.848423	3.69071	4.92429	1.28462
C5b-26	This study	JB17-C5b	Kaapvaal	S Barberton	Igneous_plutonic	Core	Y	3432	29	149.8	7.7	158	10	8.35274		640.946	1.10425	0.151	10.56	0.174	1.52	2.55	0.773	13.28	4.65	54.28	20.78	96.2	22.18	208.1	39.48	9770	0.409	58.7	200.1	61.6932	18.306	5.0229	6.01231	1.81695	14.4616	18.9948	2.42232	0.651727	2.00915	0.848423	3.69071	4.92429	1.28462
C5b-27	This study	JB17-C5b	Kaapvaal	S Barberton	Igneous_plutonic	Core	N	3421	29	183.7	49.1	117	-20	15.7329		1164.95	3.73425	3.98	47.2	2.74	19	21.3	3.4	54.1	13.1	120.4	39.2	161.2	33.9	310	53.2	10660	0.91	157	351	61.6932	18.306	5.0229	6.01231	1.81695	14.4616	18.9948	2.42232	0.651727	2.00915	0.848423	3.69071	4.92429	1.28462
C5b-28	This study	JB17-C5b	Kaapvaal	S Barberton	Igneous_plutonic	Core	N	3350	35	135.8	247	227	2120	13.6714		2101.95	5.18425	7.43	63.5	6.8	41.7	25.2	3.84	54.1	14.87	161.2	61.2	282.2	60.8	574	106	8480	2.96	399	462	61.6932	18.306	5.0229	6.01231	1.81695	14.4616	18.9948	2.42232	0.651727	2.00915	0.848423	3.69071	4.92429	1.28462
C5b-29	This study	JB17-C5b	Kaapvaal	S Barberton	Igneous_plutonic	Core	Y	3429	37	151.8	26.8	114.5	-80	7.26416		766.946	1.67425	0.61	27.2	0.78	9.3	5.8	4.42	23.3	6.61	70.1	24.7	110	24.1	228	41.1	10100	0.49	79.1	199.2	61.6932	18.306	5.0229	6.01231	1.81695	14.4616	18.9948	2.42232	0.651727	2.00915	0.848423	3.69071	4.92429	1.28462
C5b-31	This study	JB17-C5b	Kaapvaal	S Barberton	Igneous_plutonic	Core	N	3445	29	139.3	118	320	590	21.3751		998.946	6.58425	11.7	114	9.5	68	33.2	16	58.7	13.6	113.6	35.7	137	27.65	241.2	42.64	10250	0.773	131.1	291	61.6932	18.306	5.0229	6.01231	1.81695	14.4616	18.9948	2.42232	0.651727	2.00915	0.848423	3.69071	4.92429	1.28462
C5b-32	This study	JB17-C5b	Kaapvaal	S Barberton	Igneous_plutonic	Core	N	3384	30	183.8	157	156.9	520	36.891		1112.95	5.02425	14.38	232	10.4	63.2	33.8	10.68	60.3	13.24	117.2	38.5	155.6	32.46	280.6	49.76	9510	0.765	277	410	61.6932	18.306	5.0229	6.01231	1.81695	14.4616	18.9948	2.42232	0.651727	2.00915	0.848423	3.69071	4.92429	1.28462
C5b-33	This study	JB17-C5b	Kaapvaal	S Barberton	Igneous_plutonic	Core	N	3426	27	148.1	55.5	113.2	95	8.47407		735.946	1.75425	6.44	55.4	3.09	19.9	17.6	3.19	42.1	9.27	77.2	24.41	101.2	21.71	204.3	38.01	10080	0.607	94.4	200.9	61.6932	18.306	5.0229	6.01231	1.81695	14.4616	18.9948	2.42232	0.651727	2.00915	0.848423	3.69071	4.92429	1.28462
C5b-34	This study	JB17-C5b	Kaapvaal	S Barberton	Igneous_plutonic	Rim	N	3353	36	173.6	137	213	880	15.2989		1271.95	2.81425	114	182	30.5	139	53.2	8.04	72.3	14.09	127.3	43.8	181	38.6	339.1	61.8	9330	0.712	179.2	376	61.6932	18.306	5.0229	6.01231	1.81695	14.4616	18.9948	2.42232	0.651727	2.00915	0.848423	3.69071	4.92429	1.28462
C5b-35	This study	JB17-C5b	Kaapvaal	S Barberton	Igneous_plutonic	Core	N	3424	31	151.5	1420	261.5	1630	37.542		2455.95	7.51425	33.2	236	20.4	126.4	66.6	25.7	124.3	26.8	237.5	76.1	309.9	62.8	554	102.1	7860	3.92	328	471	61.6932	18.306	5.0229	6.01231	1.81695	14.4616	18.9948	2.42232	0.651727	2.00915	0.848423	3.69071	4.92429	1.28462
C5b-36	This study	JB17-C5b	Kaapvaal	S Barberton	Igneous_plutonic	Core	Y	3484	33	161.3	32.1	196.4	230	6.13041		891.946	3.84425	0.327	15.37	0.254	2.68	3.15	0.797	17	5.86	72.7	30.04	141.2	31.86	299.9	58.9	8330	2.04	142.6	245.4	61.6932	18.306	5.0229	6.01231	1.81695	14.4616	18.9948	2.42232	0.651727	2.00915	0.848423	3.69071	4.92429	1.28462
C5b-37	This study	JB17-C5b	Kaapvaal	S Barberton	Igneous_plutonic	Core	N	3117	48	161.5	179	174.9	590	143.224		1487.95	15.4642	18.5	163	19.6	139	90.2	19.1	115.4	19.8	149.5	46.4	187	39.2	350	63.4	9070	0.836	535	354	61.6932	18.306	5.0229	6.01231	1.81695	14.4616	18.9948	2.42232	0.651727	2.00915	0.848423	3.69071	4.92429	1.28462
C5b-39	This study	JB17-C5b	Kaapvaal	S Barberton	Igneous_plutonic	Core	N	3464	34	210	137	294	1390	14.5394		1551.95	8.00425	9.4	90	5.5	34.5	22.4	4.44	61.3	15.21	149.2	50.1	196.6	39.44	333	56.6	9060	1.35	388	655	61.6932	18.306	5.0229	6.01231	1.81695	14.4616	18.9948	2.42232	0.651727	2.00915	0.848423	3.69071	4.92429	1.28462
C5b-41	This study	JB17-C5b	Kaapvaal	S Barberton	Igneous_plutonic	Core	N	2928	60	141.4	1190	215	6370	89		3550	30.1	66	497	54	414	316	45	504	86	562	129	406	72.8	567	89.2	10830	9.79	650	2060	61.6932	18.306	5.0229	6.01231	1.81695	14.4616	18.9948	2.42232	0.651727	2.00915	0.848423	3.69071	4.92429	1.28462
C5b-42	This study	JB17-C5b	Kaapvaal	S Barberton	Igneous_plutonic	Rim	N	3456	34	153.3	33	99	0	5.7		930	4.22	0.51	22.9	0.31	2.24	3.58	0.96	20.2	6.53	77.4	31	136.5	31.4	286	51.8	9900	1.03	89.2	240.4	61.6932	18.306	5.0229	6.01231	1.81695	14.4616	18.9948	2.42232	0.651727	2.00915	0.848423	3.69071	4.92429	1.28462
C5b-43	This study	JB17-C5b	Kaapvaal	S Barberton	Igneous_plutonic	Rim	N	3389	37	176	360	138	1200	110		1300	7.3	39	290	37	350	224	55	221	27.2	168	45.3	161	32.2	288	49.7	9990	0.98	184	433	61.6932	18.306	5.0229	6.01231	1.81695	14.4616	18.9948	2.42232	0.651727	2.00915	0.848423	3.69071	4.92429	1.28462
C5b-44	This study	JB17-C5b	Kaapvaal	S Barberton	Igneous_plutonic	Core	N	3468	35	162	71	154	230	16.9		980	3.09	5.5	64	3.8	22.9	21.1	3.31	49	12.2	105	32.8	133	28.6	275	47.4	9780	0.559	131	253	61.6932	18.306	5.0229	6.01231	1.81695	14.4616	18.9948	2.42232	0.651727	2.00915	0.848423	3.69071	4.92429	1.28462
C5b-45	This study	JB17-C5b	Kaapvaal	S Barberton	Igneous_plutonic	Core	N	3256	37	211.3	98	264	1170	12.6		1925	5.51	3.66	59.4	2.26	17.3	18.2	3.74	67.8	18.77	196	67.7	277	57.1	529	88.9	9310	1.03	352	558	61.6932	18.306	5.0229	6.01231	1.81695	14.4616	18.9948	2.42232	0.651727	2.00915	0.848423	3.69071	4.92429	1.28462
C5b-47	This study	JB17-C5b	Kaapvaal	S Barberton	Igneous_plutonic	Rim	N	3420	37	144.3	247	184	870	58		1160	5.02	45.3	209	28.8	230	140	31.4	188	22.4	136	36.9	147	30.9	271	51.1	9280	0.39	251	340	61.6932	18.306	5.0229	6.01231	1.81695	14.4616	18.9948	2.42232	0.651727	2.00915	0.848423	3.69071	4.92429	1.28462
C5b-48	This study	JB17-C5b	Kaapvaal	S Barberton	Igneous_plutonic	Core	N	3468	40	174.8	200	213	330	29		796	1.85	1.21	18.2	0.673	3.9	5.5	1.1	19.4	5.66	72.7	27.1	122	28.9	254	47.7	10020	0.48	75.7	237	61.6932	18.306	5.0229	6.01231	1.81695	14.4616	18.9948	2.42232	0.651727	2.00915	0.848423	3.69071	4.92429	1.28462
C5b-49	This study	JB17-C5b	Kaapvaal	S Barberton	Igneous_plutonic	Core	N	3413	44	192.1	305	139	1000	51		1397	14.3	12.2	111	9.7	70	43.3	6.97	87.7	18.3	159	46.3	187.1	39.4	357	70.3	12040	1.29	185	514	61.6932	18.306	5.0229	6.01231	1.81695	14.4616	18.9948	2.42232	0.651727	2.00915	0.848423	3.69071	4.92429	1.28462
C5b-50	This study	JB17-C5b	Kaapvaal	S Barberton	Igneous_plutonic	Rim	N	3217	36	178.5	390	172	1400	12.9		1077	5.42	36.9	156	18.9	112	64	10.6	94.6	17.2	129.8	35.8	140.6	30.04	263	49.7	10760	2.59	127	402	61.6932	18.306	5.0229	6.01231	1.81695	14.4616	18.9948	2.42232	0.651727	2.00915	0.848423	3.69071	4.92429	1.28462
C5b-52	This study	JB17-C5b	Kaapvaal	S Barberton	Igneous_plutonic	Core	N	3466	44	121.1	-1	131	270	10.9		628	1.69	2.83	27.8	3.25	23.3	17.1	3.98	28.6	6.35	59.7	20.3	91.1	20.58	182.7	35	9120	0.209	57.8	177	61.6932	18.306	5.0229	6.01231	1.81695	14.4616	18.9948	2.42232	0.651727	2.00915	0.848423	3.69071	4.92429	1.28462
C5b-53	This study	JB17-C5b	Kaapvaal	S Barberton	Igneous_plutonic	Core	N	3443	41	175.7	14	120	340	5.1		901	2.63	0.93	22.1	0.66	3.57	3.86	1.24	21.2	6.99	80.1	31.7	143.9	33	309	52.2	10290	0.62	98.8	274	61.6932	18.306	5.0229	6.01231	1.81695	14.4616	18.9948	2.42232	0.651727	2.00915	0.848423	3.69071	4.92429	1.28462
C5b-54	This study	JB17-C5b	Kaapvaal	S Barberton	Igneous_plutonic	Rim	N	3408	40	174.9	790	560	1310	160		1240	10.5	23.8	196	29.9	275	189	39.9	206	24.6	156	38.9	153	30.9	268	48.4	10380	0.7	178	495	61.6932	18.306	5.0229	6.01231	1.81695	14.4616	18.9948	2.42232	0.651727	2.00915	0.848423	3.69071	4.92429	1.28462
C5b-56	This study	JB17-C5b	Kaapvaal	S Barberton	Igneous_plutonic	Core	N	3460	42	153.7	17	113	-20	19.1		790	2.87	3.26	48.1	2.5	15.1	9.7	2.15	23.4	6.7	69.4	26.2	115.8	24.7	227.1	41.3	9400	0.61	85	254.1	61.6932	18.306	5.0229	6.01231	1.81695	14.4616	18.9948	2.42232	0.651727	2.00915	0.848423	3.69071	4.92429	1.28462
C5b-57	This study	JB17-C5b	Kaapvaal	S Barberton	Igneous_plutonic	Core	N	3445	36	173	87	195	700	270		1532	9	4.9	100	3.2	19.6	16.4	2.93	52.9	14.3	147.5	50.5	218.5	45.4	408	73.8	8650	1.26	189.3	379	61.6932	18.306	5.0229	6.01231	1.81695	14.4616	18.9948	2.42232	0.651727	2.00915	0.848423	3.69071	4.92429	1.28462
C5b-58	This study	JB17-C5b	Kaapvaal	S Barberton	Igneous_plutonic	Core	N	3429	36	191.4	164	102	690	59		1056	7.57	16.6	129	17.8	122	50	19.8	70.3	13.2	113.7	35.8	145.7	31	280.1	47.6	10290	0.93	218	423	61.6932	18.306	5.0229	6.01231	1.81695	14.4616	18.9948	2.42232	0.651727	2.00915	0.848423	3.69071	4.92429	1.28462
C5b-59	This study	JB17-C5b	Kaapvaal	S Barberton	Igneous_plutonic	Rim	N	3333	38	195.5	362	121.3	1640	52.2		1143	9.08	15.3	184	24.2	154	50	11	63.5	12.3	111.8	37.3	159	34.8	330	59.2	10200	0.99	203	490	61.6932	18.306	5.0229	6.01231	1.81695	14.4616	18.9948	2.42232	0.651727	2.00915	0.848423	3.69071	4.92429	1.28462
C5b-60	This study	JB17-C5b	Kaapvaal	S Barberton	Igneous_plutonic	Core	Y	3436	40	163.9	-8	162	-120	2.5		597	1.45	0.056	9.36	0.064	1.03	2.17	0.677	14.1	4.54	54.7	19.9	91.2	19.8	178.9	33	9580	0.57	67.7	213	61.6932	18.306	5.0229	6.01231	1.81695	14.4616	18.9948	2.42232	0.651727	2.00915	0.848423	3.69071	4.92429	1.28462
C5b-61	This study	JB17-C5b	Kaapvaal	S Barberton	Igneous_plutonic	Rim	N	3223	37	206.2	665	201	2820	135		1830	14.8	47.8	312	38.7	288	167	45.9	199	29.5	209	61.4	241.7	50.5	461	82.3	11970	1.57	413	711	61.6932	18.306	5.0229	6.01231	1.81695	14.4616	18.9948	2.42232	0.651727	2.00915	0.848423	3.69071	4.92429	1.28462
C5b-62	This study	JB17-C5b	Kaapvaal	S Barberton	Igneous_plutonic	Core	N	3459	38	166.6	295	174	-90	69		1038	5.7	22.1	204	25	197	63.9	71	71.8	12.2	104	33.7	142.4	31.1	285	52	9130	0.62	166	309	61.6932	18.306	5.0229	6.01231	1.81695	14.4616	18.9948	2.42232	0.651727	2.00915	0.848423	3.69071	4.92429	1.28462
C5b-63	This study	JB17-C5b	Kaapvaal	S Barberton	Igneous_plutonic	Rim	N	3399	43	181.4	355	132	1520	73		1360	9.5	22.1	232	28.3	187	90	17.5	107	18.9	148	45.9	178	38	339	59.3	11140	0.74	191	501	61.6932	18.306	5.0229	6.01231	1.81695	14.4616	18.9948	2.42232	0.651727	2.00915	0.848423	3.69071	4.92429	1.28462
C5b-64	This study	JB17-C5b	Kaapvaal	S Barberton	Igneous_plutonic	Core	N	3377	42	146.8	33	181	200	10.4		889	2.68	26.2	75.4	8.3	49.5	26.6	7.4	45.6	9.04	85.1	30.6	130.4	27.62	259.5	47.1	9120	0.51	102.3	249.3	61.6932	18.306	5.0229	6.01231	1.81695	14.4616	18.9948	2.42232	0.651727	2.00915	0.848423	3.69071	4.92429	1.28462
C5b-65	This study	JB17-C5b	Kaapvaal	S Barberton	Igneous_plutonic	Core	N	3347	34	154.6	72	156.7	580	7.4		835	2.74	4.57	43.4	4.14	37.8	25.6	6.08	48.3	9.04	84.9	28.1	117.3	26.5	234.7	44.1	9730	0.6	94.3	254.5	61.6932	18.306	5.0229	6.01231	1.81695	14.4616	18.9948	2.42232	0.651727	2.00915	0.848423	3.69071	4.92429	1.28462
C5b-66	This study	JB17-C5b	Kaapvaal	S Barberton	Igneous_plutonic	Core	N	3453	48	169	428	20500	44000	166		1510	15.4	39.6	368	52	408	256	109	265	34.8	203	50.2	177	36.3	300	55.3	9680	0.38	317	289	61.6932	18.306	5.0229	6.01231	1.81695	14.4616	18.9948	2.42232	0.651727	2.00915	0.848423	3.69071	4.92429	1.28462
C5b-67	This study	JB17-C5b	Kaapvaal	S Barberton	Igneous_plutonic	Core	N	3452	43	179.7	363	107	1160	11.3		2260	6.53	22.4	148	15.7	128	102	22.5	163	32.8	256	72.7	262	49.6	450	71.7	10310	0.77	126	387	61.6932	18.306	5.0229	6.01231	1.81695	14.4616	18.9948	2.42232	0.651727	2.00915	0.848423	3.69071	4.92429	1.28462
C5b-69	This study	JB17-C5b	Kaapvaal	S Barberton	Igneous_plutonic	Rim	N	3177	49	208.3	670	185	3080	21.3		2470	6.7	89	342	40.3	257	137	106	225	38.2	298	86	316	63.8	550	83.9	11070	1.84	428	740	61.6932	18.306	5.0229	6.01231	1.81695	14.4616	18.9948	2.42232	0.651727	2.00915	0.848423	3.69071	4.92429	1.28462
C5b-70	This study	JB17-C5b	Kaapvaal	S Barberton	Igneous_plutonic	Core	N	3339	36	153.6	179	202	990	21.6		1043	4.17	24.5	107	12.4	78	32.1	17.7	52.7	11.21	105.4	35.1	148.9	31.8	288	53.2	9270	0.82	165.7	331	61.6932	18.306	5.0229	6.01231	1.81695	14.4616	18.9948	2.42232	0.651727	2.00915	0.848423	3.69071	4.92429	1.28462
C5b-71	This study	JB17-C5b	Kaapvaal	S Barberton	Igneous_plutonic	Core	N	3460	35	176.1	27	138	390	19.8		914	3.73	2.38	43.1	2.3	15	10.2	2.94	29.1	7.59	83	31.4	131.4	29	276	48	9460	0.7	123.8	307	61.6932	18.306	5.0229	6.01231	1.81695	14.4616	18.9948	2.42232	0.651727	2.00915	0.848423	3.69071	4.92429	1.28462
C6-01	This study	JB17-C6	Kaapvaal	S Barberton	Igneous_plutonic	Core	N	3429	35	147.4	778	226.7	350	82.2451		875.946	2.51425	8.21	73.8	8.1	62.4	35.3	8.71	46.6	10.05	85.3	29.2	125.6	26.49	245	44.8	9220	0.355	148.7	244.9	73.3817	15.5466	1.69902	5.64954	2.19127	2.19513	10.2259	1.14531	0.371805	0.746488	0.187288	2.48659	3.45204	0.767476
C6-02	This study	JB17-C6	Kaapvaal	S Barberton	Igneous_plutonic	Core	N	3453	34	154.5	314	141	120	118.16		1188.95	8.07425	12.6	170.7	12.63	85.9	54.3	9.06	80.8	15.2	124.1	37.5	146.4	31.3	278	48.1	10030	0.682	384	623	73.3817	15.5466	1.69902	5.64954	2.19127	2.19513	10.2259	1.14531	0.371805	0.746488	0.187288	2.48659	3.45204	0.767476
C6-03	This study	JB17-C6	Kaapvaal	S Barberton	Igneous_plutonic	Core	N	3447	30	153.7	111	1730	4800	8.06176		595.946	1.46425	4.21	41.7	2.19	13.8	6.8	1.95	22.1	5.85	60.2	20.73	86	18.28	166.8	30.1	9510	0.531	151.2	272.9	73.3817	15.5466	1.69902	5.64954	2.19127	2.19513	10.2259	1.14531	0.371805	0.746488	0.187288	2.48659	3.45204	0.767476
C6-04	This study	JB17-C6	Kaapvaal	S Barberton	Igneous_plutonic	Core	N	3362	28	202.9	425	147.5	344	89.7318		971.946	4.26425	9.1	159	8.4	47.9	24.6	7.49	47.8	10.97	102.7	33.4	135.4	28.05	246.8	41.25	10050	0.917	370	463	73.3817	15.5466	1.69902	5.64954	2.19127	2.19513	10.2259	1.14531	0.371805	0.746488	0.187288	2.48659	3.45204	0.767476
C6-05	This study	JB17-C6	Kaapvaal	S Barberton	Igneous_plutonic	Core	N	3453	30	169.4	163	130.6	170	36.674		774.946	1.90425	2.4	46.7	1.76	11.6	9	2.25	26.7	7.17	74.3	26.5	114.3	24.6	237	41.1	10050	0.58	138.8	267	73.3817	15.5466	1.69902	5.64954	2.19127	2.19513	10.2259	1.14531	0.371805	0.746488	0.187288	2.48659	3.45204	0.767476
C6-06	This study	JB17-C6	Kaapvaal	S Barberton	Igneous_plutonic	Rim	N	3453	29	164.3	81.4	79.6	0	22.7856		687.946	1.88425	2.23	61	2.19	14	9.08	2.22	23.4	6.24	65	23.83	104.5	23.01	219	38.34	9910	0.603	112	258.1	73.3817	15.5466	1.69902	5.64954	2.19127	2.19513	10.2259	1.14531	0.371805	0.746488	0.187288	2.48659	3.45204	0.767476
C6-07	This study	JB17-C6	Kaapvaal	S Barberton	Igneous_plutonic	Core	N	3284	36	126.1	1366	212	2050	106.116		1358.95	6.27425	52.7	369	37.7	171.3	63.6	20.44	85.4	17.5	144	42.3	162	31.5	283	47.6	8820	0.85	353	408	73.3817	15.5466	1.69902	5.64954	2.19127	2.19513	10.2259	1.14531	0.371805	0.746488	0.187288	2.48659	3.45204	0.767476
C6-08	This study	JB17-C6	Kaapvaal	S Barberton	Igneous_plutonic	Core	N	3442	29	130.2	119.7	146.4	20	31.6828		621.946	1.83425	3.28	44.6	5.5	53.3	27.1	9.82	33	6.49	60	20.81	90.5	19.95	187.7	34.32	10040	0.352	96.2	179.1	73.3817	15.5466	1.69902	5.64954	2.19127	2.19513	10.2259	1.14531	0.371805	0.746488	0.187288	2.48659	3.45204	0.767476
C6-09	This study	JB17-C6	Kaapvaal	S Barberton	Igneous_plutonic	Core	N	3364	28	160.6	757	300	740	194.654		1089.95	8.69425	26.5	194.1	25.1	201	108.8	25.38	101.1	15.43	118.7	36.6	146.6	30.91	283.7	49.44	9650	0.696	224	412	73.3817	15.5466	1.69902	5.64954	2.19127	2.19513	10.2259	1.14531	0.371805	0.746488	0.187288	2.48659	3.45204	0.767476
C6-10	This study	JB17-C6	Kaapvaal	S Barberton	Igneous_plutonic	Core	N	3461	29	134.9	1180	147.4	240	79.2071		765.946	1.35425	6.4	52.6	5.5	35.4	15.8	6.6	31.2	7.52	73.1	25.1	107.5	22.64	205.9	38	9990	0.373	79.3	200.1	73.3817	15.5466	1.69902	5.64954	2.19127	2.19513	10.2259	1.14531	0.371805	0.746488	0.187288	2.48659	3.45204	0.767476
C6-11	This study	JB17-C6	Kaapvaal	S Barberton	Igneous_plutonic	Core	N	3428	34	125.9	260	550	670	30.4893		474.946	1.13425	1.23	24	1.96	18.1	10.3	6.64	17.7	4.27	43.7	15.63	71	15.59	147.5	28.11	9240	0.336	51	146	73.3817	15.5466	1.69902	5.64954	2.19127	2.19513	10.2259	1.14531	0.371805	0.746488	0.187288	2.48659	3.45204	0.767476
C6-12	This study	JB17-C6	Kaapvaal	S Barberton	Igneous_plutonic	Core	N	3138	33	123.6	1940	241	1890	244.131		1097.95	10.8042	62.3	366	40	239	99.9	34.4	101.2	16.5	123.2	36.9	150.1	31.2	294	52	8250	3.49	502	435	73.3817	15.5466	1.69902	5.64954	2.19127	2.19513	10.2259	1.14531	0.371805	0.746488	0.187288	2.48659	3.45204	0.767476
C6-13	This study	JB17-C6	Kaapvaal	S Barberton	Igneous_plutonic	Core	N	3403	31	147.9	575	268	290	59.134		819.946	3.95425	45	169	20.1	125.9	53.2	13.34	65.5	11.67	89.8	25.6	104.8	21.43	192.4	36.3	11250	0.429	107.8	261.1	73.3817	15.5466	1.69902	5.64954	2.19127	2.19513	10.2259	1.14531	0.371805	0.746488	0.187288	2.48659	3.45204	0.767476
C6-14	This study	JB17-C6	Kaapvaal	S Barberton	Igneous_plutonic	Core	N	3370	30	162.9	164	157.5	280	30.9233		968.946	2.71425	3.65	64.5	2.68	15.9	11.21	3.17	32.7	9.24	94.6	32.17	136.7	28.54	256.1	44.9	9230	0.715	194.8	327.4	73.3817	15.5466	1.69902	5.64954	2.19127	2.19513	10.2259	1.14531	0.371805	0.746488	0.187288	2.48659	3.45204	0.767476
C6-15	This study	JB17-C6	Kaapvaal	S Barberton	Igneous_plutonic	Core	N	3359	31	166	803	237	550	152.989		1448.95	5.48425	24.3	184	19.9	111	56.6	12.5	87	17.6	148	46.1	183.3	36.9	323	57	9230	0.912	300	449	73.3817	15.5466	1.69902	5.64954	2.19127	2.19513	10.2259	1.14531	0.371805	0.746488	0.187288	2.48659	3.45204	0.767476
C6-16	This study	JB17-C6	Kaapvaal	S Barberton	Igneous_plutonic	Core	N	3450	30	159.4	403	154	170	99.7141		663.946	3.24425	13.6	138	15.1	125	64.1	18.7	60.2	9.71	72.9	22.28	88.9	18.18	161.5	29.8	9200	0.636	210	386	73.3817	15.5466	1.69902	5.64954	2.19127	2.19513	10.2259	1.14531	0.371805	0.746488	0.187288	2.48659	3.45204	0.767476
C6-17	This study	JB17-C6	Kaapvaal	S Barberton	Igneous_plutonic	Rim	N	3462	30	149.2	485	62.3	3930	32.0083		379.946	1.60425	7.61	61.9	8.01	71.2	23.1	21.6	18.9	2.76	25.39	10.05	54.54	14.43	160.4	37.28	14100	0.52	116.2	765	73.3817	15.5466	1.69902	5.64954	2.19127	2.19513	10.2259	1.14531	0.371805	0.746488	0.187288	2.48659	3.45204	0.767476
C6-18	This study	JB17-C6	Kaapvaal	S Barberton	Igneous_plutonic	Core	N	3451	32	172.2	658	126.4	480	171.109		715.946	5.54425	28.21	261.7	22.31	133.7	61.4	18.54	70.6	11.56	84.3	23.98	94.5	19.64	177.3	31.68	11060	0.665	176.7	379	73.3817	15.5466	1.69902	5.64954	2.19127	2.19513	10.2259	1.14531	0.371805	0.746488	0.187288	2.48659	3.45204	0.767476
C6-19	This study	JB17-C6	Kaapvaal	S Barberton	Igneous_plutonic	Rim	N	3450	34	161.2	30.1	161	180	8.24622		937.946	2.07425	3.02	38.4	1.47	7.7	5.84	2	26.1	8.15	87.8	31.6	137	30.7	290	48.5	10680	0.59	114.2	274	73.3817	15.5466	1.69902	5.64954	2.19127	2.19513	10.2259	1.14531	0.371805	0.746488	0.187288	2.48659	3.45204	0.767476
C6-20	This study	JB17-C6	Kaapvaal	S Barberton	Igneous_plutonic	Core	N	3327	33	175.1	627	159	180	89.7318		813.946	4.77425	17.44	155.4	13.05	92.1	49.3	11.18	53.4	9.66	83.7	27.3	113.4	24.67	224	38.5	9620	0.677	159.2	403.1	73.3817	15.5466	1.69902	5.64954	2.19127	2.19513	10.2259	1.14531	0.371805	0.746488	0.187288	2.48659	3.45204	0.767476
C6-21	This study	JB17-C6	Kaapvaal	S Barberton	Igneous_plutonic	Core	N	3360	27	146.3	207	142.4	460	13.335		881.946	2.01425	6.3	50.7	2.73	13.1	7.91	1.77	29.7	8.14	84.2	29.6	127.3	26.97	250.2	43.7	9730	0.485	119.2	246	73.3817	15.5466	1.69902	5.64954	2.19127	2.19513	10.2259	1.14531	0.371805	0.746488	0.187288	2.48659	3.45204	0.767476
C6-22	This study	JB17-C6	Kaapvaal	S Barberton	Igneous_plutonic	Core	N	3306	38	128.1	1428	129.5	1500	72.0459		1068.95	4.47425	73.2	320	48.8	248	78.9	23	71.2	11.76	98.3	32.9	141.7	31.96	306.3	57.6	10370	0.74	358	508	73.3817	15.5466	1.69902	5.64954	2.19127	2.19513	10.2259	1.14531	0.371805	0.746488	0.187288	2.48659	3.45204	0.767476
C6-23	This study	JB17-C6	Kaapvaal	S Barberton	Igneous_plutonic	Rim	N	3457	34	145.4	156	193.5	180	25.6067		1022.95	2.95425	8.71	83.7	7.16	36.8	19.5	6.11	37.9	9.67	98.2	34.01	143.1	30.28	275.7	48.6	9500	0.61	128.1	261.6	73.3817	15.5466	1.69902	5.64954	2.19127	2.19513	10.2259	1.14531	0.371805	0.746488	0.187288	2.48659	3.45204	0.767476
C6-24	This study	JB17-C6	Kaapvaal	S Barberton	Igneous_plutonic	Core	Y	3462	33	130.5	5	131	-50	3.09233		695.946	1.39425	0.093	21.7	0.094	1.76	3.07	0.93	17.7	5.6	64	24.1	102.7	22.97	219.7	37.8	10370	0.51	67.4	194.5	73.3817	15.5466	1.69902	5.64954	2.19127	2.19513	10.2259	1.14531	0.371805	0.746488	0.187288	2.48659	3.45204	0.767476
C6-25	This study	JB17-C6	Kaapvaal	S Barberton	Igneous_plutonic	Core	N	3424	30	148.2	481	147	140	86.0427		853.946	3.48425	18.15	165.7	13.27	71.9	32.9	9	40.4	8.58	79.7	27.56	118.2	25.77	238.9	42.28	9710	0.564	143.6	244.1	73.3817	15.5466	1.69902	5.64954	2.19127	2.19513	10.2259	1.14531	0.371805	0.746488	0.187288	2.48659	3.45204	0.767476
C6-26	This study	JB17-C6	Kaapvaal	S Barberton	Igneous_plutonic	Core	N	3445	30	141	248	226	230	46.6562		951.946	1.83425	31.2	91	10.6	39.8	13.1	4.03	33.9	8.47	86.5	28.9	123.3	25.6	240	45.4	9390	0.41	92.6	190	73.3817	15.5466	1.69902	5.64954	2.19127	2.19513	10.2259	1.14531	0.371805	0.746488	0.187288	2.48659	3.45204	0.767476
C6-27	This study	JB17-C6	Kaapvaal	S Barberton	Igneous_plutonic	Rim	N	3422	35	146.5	486	208	790	114.036		859.946	6.36425	17.7	191	18.6	168	72.3	31.4	82.1	11.94	91.5	27.8	113.1	23.62	222.5	41.6	10260	0.555	113.5	358	73.3817	15.5466	1.69902	5.64954	2.19127	2.19513	10.2259	1.14531	0.371805	0.746488	0.187288	2.48659	3.45204	0.767476
C6-28	This study	JB17-C6	Kaapvaal	S Barberton	Igneous_plutonic	Core	N	3469	27	196.7	320	228	530	30.8148		1950.95	8.19425	12.7	136	6.65	36.6	20.4	4.56	54.4	15.59	168.6	59.3	259.1	56.6	513.7	87.7	9620	3.02	291	419	73.3817	15.5466	1.69902	5.64954	2.19127	2.19513	10.2259	1.14531	0.371805	0.746488	0.187288	2.48659	3.45204	0.767476
C6-29	This study	JB17-C6	Kaapvaal	S Barberton	Igneous_plutonic	Core	N	3378	32	144.4	567	157.2	400	41.0141		731.946	2.70425	39	138.1	16.4	81.1	25.2	11.04	36.5	7.67	67.2	22.49	98.1	21.94	211.8	38.3	9900	0.517	88.1	347	73.3817	15.5466	1.69902	5.64954	2.19127	2.19513	10.2259	1.14531	0.371805	0.746488	0.187288	2.48659	3.45204	0.767476
C6-30	This study	JB17-C6	Kaapvaal	S Barberton	Igneous_plutonic	Core	N	3352	29	157.3	630	233	1240	12.1523		1448.95	2.84425	3.61	30.4	1.8	13	10.97	2.17	40.8	11.79	133	47.2	206	44.4	402	73.9	7500	1.28	241	407	73.3817	15.5466	1.69902	5.64954	2.19127	2.19513	10.2259	1.14531	0.371805	0.746488	0.187288	2.48659	3.45204	0.767476
C6-31	This study	JB17-C6	Kaapvaal	S Barberton	Igneous_plutonic	Core	N	3433	29	149	188	120.6	110	38.7355		894.946	2.70425	7.5	84.2	6.5	36.2	18.1	5.24	36.3	9.01	86.3	29.66	124.2	27.03	248.2	43.8	10210	0.624	145.7	299	73.3817	15.5466	1.69902	5.64954	2.19127	2.19513	10.2259	1.14531	0.371805	0.746488	0.187288	2.48659	3.45204	0.767476
C6-32	This study	JB17-C6	Kaapvaal	S Barberton	Igneous_plutonic	Core	N	3443	28	123.3	609	248	360	98.7376		975.946	6.15425	37.5	323	31.5	235	100	26.2	96	14.63	109.4	32.9	131	27.35	237.8	41.68	9610	0.614	196	377	73.3817	15.5466	1.69902	5.64954	2.19127	2.19513	10.2259	1.14531	0.371805	0.746488	0.187288	2.48659	3.45204	0.767476
C6-33	This study	JB17-C6	Kaapvaal	S Barberton	Igneous_plutonic	Core	N	3461	34	161.1	218	319	560	88.9723		824.946	2.70425	10.7	93	5.24	28.9	12.6	2.56	30.6	7.87	80.1	28.13	119.1	25.57	235.3	41.6	9540	0.716	140.3	275.4	73.3817	15.5466	1.69902	5.64954	2.19127	2.19513	10.2259	1.14531	0.371805	0.746488	0.187288	2.48659	3.45204	0.767476
C6-34	This study	JB17-C6	Kaapvaal	S Barberton	Igneous_plutonic	Core	N	3446	32	122.8	339	183	190	35.0464		857.946	2.75425	7.26	79.2	5.19	31.4	15.7	5.2	31.7	7.6	79.5	28.6	125.8	26.69	243.7	45.4	9010	0.663	112.6	236.3	73.3817	15.5466	1.69902	5.64954	2.19127	2.19513	10.2259	1.14531	0.371805	0.746488	0.187288	2.48659	3.45204	0.767476
C6-35	This study	JB17-C6	Kaapvaal	S Barberton	Igneous_plutonic	Rim	N	3452	28	132.9	647	315	460	116.641		850.946	5.33425	31.41	375	36.7	240.5	88.8	36.9	88.3	13.16	92.6	26.7	105.8	21.54	188.3	34.2	9040	0.64	261.4	279.2	73.3817	15.5466	1.69902	5.64954	2.19127	2.19513	10.2259	1.14531	0.371805	0.746488	0.187288	2.48659	3.45204	0.767476
C6-36	This study	JB17-C6	Kaapvaal	S Barberton	Igneous_plutonic	Core	N	3343	28	179.7	165	130.1	230	16.0584		1186.95	3.21425	2.76	60	1.85	12	8.97	3.46	34.4	9.96	106.6	36.4	155	33.2	299	50.2	10500	0.804	239.9	381	73.3817	15.5466	1.69902	5.64954	2.19127	2.19513	10.2259	1.14531	0.371805	0.746488	0.187288	2.48659	3.45204	0.767476
C6-37	This study	JB17-C6	Kaapvaal	S Barberton	Igneous_plutonic	Rim	Y	3422	32	132.8	153	114.1	130	6.26061		507.946	1.18425	0.135	16.71	0.126	1.38	2.45	0.671	13.54	4.04	45.3	17.22	76.5	16.68	159.3	30.71	9230	0.385	76.5	163.2	73.3817	15.5466	1.69902	5.64954	2.19127	2.19513	10.2259	1.14531	0.371805	0.746488	0.187288	2.48659	3.45204	0.767476
C6-38	This study	JB17-C6	Kaapvaal	S Barberton	Igneous_plutonic	Core	Y	3449	29	135.2	13.2	183	10	7.16119		542.946	1.04425	0.347	17.6	0.235	1.74	2.96	0.76	13.24	4.32	45.6	17.35	80.4	17.84	169.9	31.4	10050	0.37	62.7	165	73.3817	15.5466	1.69902	5.64954	2.19127	2.19513	10.2259	1.14531	0.371805	0.746488	0.187288	2.48659	3.45204	0.767476
C6-39	This study	JB17-C6	Kaapvaal	S Barberton	Igneous_plutonic	Rim	N	3449	31	142.1	28.1	113.3	140	11.5013		667.946	1.73425	1.22	29.2	1.08	6.89	5.26	1.49	19.4	5.62	60.1	21.94	97.8	21.68	196.3	36.44	9360	0.489	84.6	205	73.3817	15.5466	1.69902	5.64954	2.19127	2.19513	10.2259	1.14531	0.371805	0.746488	0.187288	2.48659	3.45204	0.767476
C6-40	This study	JB17-C6	Kaapvaal	S Barberton	Igneous_plutonic	Core	N	3452	42	103.9	110	106	-240	30.1		534	1.49	2.71	37.7	2.1	19.1	14	3.6	29	5.75	56.4	17.4	74.5	14.9	135.6	25	9640	0.287	57.4	128.6	73.3817	15.5466	1.69902	5.64954	2.19127	2.19513	10.2259	1.14531	0.371805	0.746488	0.187288	2.48659	3.45204	0.767476
C6-41	This study	JB17-C6	Kaapvaal	S Barberton	Igneous_plutonic	Core	N	3428	46	143	225	169	-490	18.5		569	1.37	3.48	38.2	3.36	30.7	12.4	3.16	22.6	4.91	48.7	18	81.7	18.15	168	34.5	10870	0.46	51.1	181.4	73.3817	15.5466	1.69902	5.64954	2.19127	2.19513	10.2259	1.14531	0.371805	0.746488	0.187288	2.48659	3.45204	0.767476
C6-42	This study	JB17-C6	Kaapvaal	S Barberton	Igneous_plutonic	Core	N	3376	34	165.2	83	105	720	9		803	2.59	1.17	42.6	0.74	6.74	6.87	2.27	25.2	7.18	76.5	26.9	114.7	25.4	227	40.3	10290	0.65	225.2	335	73.3817	15.5466	1.69902	5.64954	2.19127	2.19513	10.2259	1.14531	0.371805	0.746488	0.187288	2.48659	3.45204	0.767476
C6-43	This study	JB17-C6	Kaapvaal	S Barberton	Igneous_plutonic	Rim	N	3459	33	130.5	86	118	-10	6.8		1038	2.82	3.89	37.2	1.93	12.1	10.8	2.33	32.6	9.62	101.4	34.8	149	31	262	50.3	9030	0.73	123.6	260	73.3817	15.5466	1.69902	5.64954	2.19127	2.19513	10.2259	1.14531	0.371805	0.746488	0.187288	2.48659	3.45204	0.767476
C6-44	This study	JB17-C6	Kaapvaal	S Barberton	Igneous_plutonic	Core	Y	3449	34	148.2	30	129	100	3.74		780	1.7	0.63	26	0.87	6.08	4.61	1.34	20.9	6.37	72.1	26.2	118.7	25.6	231.7	41.1	9810	0.62	84.5	209	73.3817	15.5466	1.69902	5.64954	2.19127	2.19513	10.2259	1.14531	0.371805	0.746488	0.187288	2.48659	3.45204	0.767476
C6-45	This study	JB17-C6	Kaapvaal	S Barberton	Igneous_plutonic	Core	N	3086	41	214.1	146	167	1990	30.6		816	3.29	3.67	76.1	4.24	29.3	15.8	4.11	35.9	8.77	84.4	27.8	112.2	23.9	204.7	35.1	10140	0.91	420	582	73.3817	15.5466	1.69902	5.64954	2.19127	2.19513	10.2259	1.14531	0.371805	0.746488	0.187288	2.48659	3.45204	0.767476
C6-46	This study	JB17-C6	Kaapvaal	S Barberton	Igneous_plutonic	Core	N	3427	36	165.8	4660	143	-130	42		601	1.39	9.1	25.9	3.51	18.5	10.7	2.4	19.2	4.85	51.1	18.76	87	19.57	179.5	38.27	10770	0.36	59.6	185.7	73.3817	15.5466	1.69902	5.64954	2.19127	2.19513	10.2259	1.14531	0.371805	0.746488	0.187288	2.48659	3.45204	0.767476
C6-47	This study	JB17-C6	Kaapvaal	S Barberton	Igneous_plutonic	Rim	N	3279	40	123.9	4100	370	2010	770		1040	29.4	102	1050	92	550	251	76	228	27.8	148	33.8	112	21.9	197	34.7	11920	24.9	468	1140	73.3817	15.5466	1.69902	5.64954	2.19127	2.19513	10.2259	1.14531	0.371805	0.746488	0.187288	2.48659	3.45204	0.767476
C6-48	This study	JB17-C6	Kaapvaal	S Barberton	Igneous_plutonic	Core	Y	3464	34	116.5	0	143	-170	2.6		591	1.22	0.054	16.2	0.046	0.94	2.37	0.78	15.6	4.85	55.4	20.1	91.9	20.7	197	35.7	10020	0.341	62.8	174	73.3817	15.5466	1.69902	5.64954	2.19127	2.19513	10.2259	1.14531	0.371805	0.746488	0.187288	2.48659	3.45204	0.767476
C6-49	This study	JB17-C6	Kaapvaal	S Barberton	Igneous_plutonic	Core	Y	3455	38	132.5	26	154	250	7.5		586	1.3	0.97	23.6	0.77	4.9	4.7	1.36	17.4	5.09	55.6	20.4	89.8	18.61	174.4	32.2	9750	0.4	70.7	171.2	73.3817	15.5466	1.69902	5.64954	2.19127	2.19513	10.2259	1.14531	0.371805	0.746488	0.187288	2.48659	3.45204	0.767476
C6-50	This study	JB17-C6	Kaapvaal	S Barberton	Igneous_plutonic	Core	N	3464	39	114.3	237	730	930	36.2		880	2.8	7.1	117	6.2	35.2	18	4.89	41.2	9.3	89	28.9	121	25.1	228	41.2	9150	0.46	97	198	73.3817	15.5466	1.69902	5.64954	2.19127	2.19513	10.2259	1.14531	0.371805	0.746488	0.187288	2.48659	3.45204	0.767476
C6-51	This study	JB17-C6	Kaapvaal	S Barberton	Igneous_plutonic	Core	N	3443	36	135.9	239	191	360	35.6		897	1.61	6.39	68.1	5.28	36.9	14.3	7.49	36.5	8.79	88.1	30.2	129.4	27.3	247	45.6	8200	0.269	103.9	195	73.3817	15.5466	1.69902	5.64954	2.19127	2.19513	10.2259	1.14531	0.371805	0.746488	0.187288	2.48659	3.45204	0.767476
C6-52	This study	JB17-C6	Kaapvaal	S Barberton	Igneous_plutonic	Core	N	3467	35	127.6	150	174	-40	22.6		759	2.2	7.14	63.2	5.03	30.5	16.6	6.33	31.1	7.04	71.4	25.23	109.4	24.29	215.5	40.04	9490	0.44	77.9	194.3	73.3817	15.5466	1.69902	5.64954	2.19127	2.19513	10.2259	1.14531	0.371805	0.746488	0.187288	2.48659	3.45204	0.767476
C6-53	This study	JB17-C6	Kaapvaal	S Barberton	Igneous_plutonic	Core	N	3343	35	120.2	1100	155	440	55.6		492	3.27	6.31	65.4	7.21	49.1	17.4	5.16	26	5.1	49.3	16.5	71.6	14.9	132.4	24.9	10240	0.73	95.9	231	73.3817	15.5466	1.69902	5.64954	2.19127	2.19513	10.2259	1.14531	0.371805	0.746488	0.187288	2.48659	3.45204	0.767476
C6-54	This study	JB17-C6	Kaapvaal	S Barberton	Igneous_plutonic	Core	Y	3469	34	137	60	121.1	170	4.4		742	1.34	0.58	20.5	0.263	2.3	3.31	0.88	17.7	5.65	66.7	24.5	103.9	23.4	214	40.4	9990	0.41	73.1	190	73.3817	15.5466	1.69902	5.64954	2.19127	2.19513	10.2259	1.14531	0.371805	0.746488	0.187288	2.48659	3.45204	0.767476
C6-55	This study	JB17-C6	Kaapvaal	S Barberton	Igneous_plutonic	Rim	N	3466	34	129.4	831	203	190	182		1328	10.1	31.5	449	30.2	163	87.4	19.1	132	25.8	178	44	155.4	30.3	251	43.6	9110	0.53	221	318	73.3817	15.5466	1.69902	5.64954	2.19127	2.19513	10.2259	1.14531	0.371805	0.746488	0.187288	2.48659	3.45204	0.767476
C6-56	This study	JB17-C6	Kaapvaal	S Barberton	Igneous_plutonic	Core	N	3431	50	146	264	97	-310	25.7		731	2.05	6.7	65.8	6.19	45.6	21.2	9.55	29.3	6.92	69.8	24.5	108.5	23.7	223	39	11160	0.53	102.7	220	73.3817	15.5466	1.69902	5.64954	2.19127	2.19513	10.2259	1.14531	0.371805	0.746488	0.187288	2.48659	3.45204	0.767476
C6-57	This study	JB17-C6	Kaapvaal	S Barberton	Igneous_plutonic	Rim	N	3368	35	198.4	112	175	640	16		1066	4.38	4.6	78	3.4	24.2	13.7	3.62	39.6	10.68	105.2	36.8	151	32.3	287	49.4	10560	0.9	254	386	73.3817	15.5466	1.69902	5.64954	2.19127	2.19513	10.2259	1.14531	0.371805	0.746488	0.187288	2.48659	3.45204	0.767476
C6-58	This study	JB17-C6	Kaapvaal	S Barberton	Igneous_plutonic	Core	Y	3462	36	137	26	160	180	6.6		673	1.35	0.399	22.1	0.421	2.87	4.41	1.04	18.4	5.66	63.2	22.45	100	21.89	199.8	37.7	9500	0.348	74.9	188.1	73.3817	15.5466	1.69902	5.64954	2.19127	2.19513	10.2259	1.14531	0.371805	0.746488	0.187288	2.48659	3.45204	0.767476
C6-59	This study	JB17-C6	Kaapvaal	S Barberton	Igneous_plutonic	Rim	N	3458	34	131	820	98	140	52		618	3.54	9.3	108	11.4	113	42	27	40.5	6.7	59.5	20.1	84	19.3	183	33.2	10910	0.48	87	202	73.3817	15.5466	1.69902	5.64954	2.19127	2.19513	10.2259	1.14531	0.371805	0.746488	0.187288	2.48659	3.45204	0.767476
C6-60	This study	JB17-C6	Kaapvaal	S Barberton	Igneous_plutonic	Core	N	3338	42	136.7	4400	155	6600	114		467	2.06	24.1	148	22.2	168	47.2	18.3	43.2	6.36	49.5	15.3	66	15.1	145	28.2	9960	0.29	82	226	73.3817	15.5466	1.69902	5.64954	2.19127	2.19513	10.2259	1.14531	0.371805	0.746488	0.187288	2.48659	3.45204	0.767476
D1a-01	This study	JB17-D1a	Kaapvaal	S Barberton	Igneous_plutonic	Core	N	3051	30	127.1	1081	146.8	5860	11.5013		1491.95	6.67425	94.9	170	24.1	131	51.6	52.9	80.9	16.44	146.2	50	210.3	43.9	393	73.9	11980	2.24	216	801	72.1826	15.8733	2.21502	5.82755	1.76976	2.52585	20.4571	1.81807	0.505922	1.12632	0.317601	2.66671	2.82425	0.563109
D1a-02	This study	JB17-D1a	Kaapvaal	S Barberton	Igneous_plutonic	Core	N	3437	32	173.9	16.3	217	1220	3.45039		1167.95	3.08425	1.9	29.1	1.09	7.8	8.5	1.96	33.7	10.14	108.9	38.3	164.5	35.6	314.8	55.1	11340	0.91	142.5	367	72.1826	15.8733	2.21502	5.82755	1.76976	2.52585	20.4571	1.81807	0.505922	1.12632	0.317601	2.66671	2.82425	0.563109
D1a-03	This study	JB17-D1a	Kaapvaal	S Barberton	Igneous_plutonic	Core	N	3356	29	161.2	85	176.5	450	12.8033		1157.95	2.88425	1.9	33.9	0.93	6.5	6.97	2.24	31.8	9.64	105.2	38.8	165.7	34.51	306.2	57.4	10780	0.834	195.7	375	72.1826	15.8733	2.21502	5.82755	1.76976	2.52585	20.4571	1.81807	0.505922	1.12632	0.317601	2.66671	2.82425	0.563109
D1a-04	This study	JB17-D1a	Kaapvaal	S Barberton	Igneous_plutonic	Core	N	3312	30	165.3	130.3	194.6	960	7.10694		798.946	2.42425	3.3	44.7	1.81	10.7	8.21	2.11	24.94	7.2	76.8	27.58	118	25.11	228	40.03	9740	0.659	121.7	324.6	72.1826	15.8733	2.21502	5.82755	1.76976	2.52585	20.4571	1.81807	0.505922	1.12632	0.317601	2.66671	2.82425	0.563109
D1a-05	This study	JB17-D1a	Kaapvaal	S Barberton	Igneous_plutonic	Core	Y	3438	29	139.9	26.7	107.6	46	2.79937		633.946	1.65425	0.71	22	0.323	3.8	6.5	1.51	18.3	5.2	55.9	20.9	95.8	21.6	209.1	36	10730	0.608	54.1	193	72.1826	15.8733	2.21502	5.82755	1.76976	2.52585	20.4571	1.81807	0.505922	1.12632	0.317601	2.66671	2.82425	0.563109
D1a-06	This study	JB17-D1a	Kaapvaal	S Barberton	Igneous_plutonic	Core	Y	3450	32	140	24.6	146.7	58	4.99431		697.23	1.46784	0.56	22.1	0.74	5.2	4.38	1.3	18.3	5.69	63.5	23.16	103.4	22.76	211.2	37.9	10070	0.473	76.5	205.4	72.1826	15.8733	2.21502	5.82755	1.76976	2.52585	20.4571	1.81807	0.505922	1.12632	0.317601	2.66671	2.82425	0.563109
D1a-07	This study	JB17-D1a	Kaapvaal	S Barberton	Igneous_plutonic	Core	N	3247	34	119.3	198.8	1930	6500	9.33124		1553.95	6.13425	18.55	128.9	19.01	144.4	69.9	21.45	97.8	18.11	158.6	52.2	214.3	42.7	374.6	63	9480	1.22	174.7	453	72.1826	15.8733	2.21502	5.82755	1.76976	2.52585	20.4571	1.81807	0.505922	1.12632	0.317601	2.66671	2.82425	0.563109
D1a-08	This study	JB17-D1a	Kaapvaal	S Barberton	Igneous_plutonic	Core	N	3349	30	142.9	93	1360	4300	10.0799		957.946	3.44425	10.3	61.6	7.5	65.4	42.2	16.8	63.9	11.09	94.8	31.94	131.2	27.68	247.2	44.6	9550	0.95	142.4	339	72.1826	15.8733	2.21502	5.82755	1.76976	2.52585	20.4571	1.81807	0.505922	1.12632	0.317601	2.66671	2.82425	0.563109
D1a-09	This study	JB17-D1a	Kaapvaal	S Barberton	Igneous_plutonic	Core	N	3422	43	138.9	80.2	3300	9200	6.07616		702.946	2.11425	14	73.1	11.65	81.7	30.9	19.02	47.2	8.48	72.8	23.98	98.5	21.54	198.6	35.9	9610	0.68	75.2	213.1	72.1826	15.8733	2.21502	5.82755	1.76976	2.52585	20.4571	1.81807	0.505922	1.12632	0.317601	2.66671	2.82425	0.563109
D1a-10	This study	JB17-D1a	Kaapvaal	S Barberton	Igneous_plutonic	Core	N	3429	31	146.5	115.8	125.9	380	12.3693		872.946	4.99425	16.9	81.3	12.5	76.8	57.4	9.97	80.9	14.62	106.3	31.04	119.3	24.91	229	41.2	10560	0.669	108.5	301	72.1826	15.8733	2.21502	5.82755	1.76976	2.52585	20.4571	1.81807	0.505922	1.12632	0.317601	2.66671	2.82425	0.563109
D1a-11	This study	JB17-D1a	Kaapvaal	S Barberton	Igneous_plutonic	Core	N	3442	33	179.4	125	197.3	560	11.8268		1052.95	4.03425	12.7	65	9.4	68	38.5	26.7	62.3	12.5	106.7	34.8	148.4	30.2	269	50.5	11020	0.62	109.9	371	72.1826	15.8733	2.21502	5.82755	1.76976	2.52585	20.4571	1.81807	0.505922	1.12632	0.317601	2.66671	2.82425	0.563109
D1a-12	This study	JB17-D1a	Kaapvaal	S Barberton	Igneous_plutonic	Core	N	3432	30	126.8	80	131.4	370	22.3516		1250.95	4.87425	21	80.7	10.3	54.7	49.5	9.7	84	17.5	129.9	40.7	171.4	36.18	329.5	60.1	9210	0.615	111.8	275.3	72.1826	15.8733	2.21502	5.82755	1.76976	2.52585	20.4571	1.81807	0.505922	1.12632	0.317601	2.66671	2.82425	0.563109
D1a-13	This study	JB17-D1a	Kaapvaal	S Barberton	Igneous_plutonic	Core	N	3390	30	147	30.4	4300	9100	5.30579		926.946	1.24425	2.75	20.9	1.45	9.2	8	2.49	29	7.77	83.9	30.2	134	29.8	276	51.9	9790	0.682	99	267	72.1826	15.8733	2.21502	5.82755	1.76976	2.52585	20.4571	1.81807	0.505922	1.12632	0.317601	2.66671	2.82425	0.563109
D1a-14	This study	JB17-D1a	Kaapvaal	S Barberton	Igneous_plutonic	Rim	N	3409	32	153.8	227	164.4	690	13.8884		945.946	4.60425	19.1	86.3	13.05	75.4	49.5	14.72	75.7	13.78	107.6	32.03	131.6	26.77	239.6	43.9	9990	0.685	114.7	384	72.1826	15.8733	2.21502	5.82755	1.76976	2.52585	20.4571	1.81807	0.505922	1.12632	0.317601	2.66671	2.82425	0.563109
D1a-16	This study	JB17-D1a	Kaapvaal	S Barberton	Igneous_plutonic	Core	N	3456	33	91.8	263	71.9	1310	6.72718		331.946	2.02425	13.3	75	9.7	57	22.6	14.7	26.1	3.96	27.1	9.58	51.7	14.28	170.3	43.7	13000	0.99	26	522	72.1826	15.8733	2.21502	5.82755	1.76976	2.52585	20.4571	1.81807	0.505922	1.12632	0.317601	2.66671	2.82425	0.563109
D1a-17	This study	JB17-D1a	Kaapvaal	S Barberton	Igneous_plutonic	Core	N	3255	39	151.6	593	183	1880	17.1434		1190.95	6.82425	38.3	160	25.8	216	98	69.4	112	17.6	132.9	39.2	157.7	32.75	302.4	56.2	11720	1.15	183.2	481	72.1826	15.8733	2.21502	5.82755	1.76976	2.52585	20.4571	1.81807	0.505922	1.12632	0.317601	2.66671	2.82425	0.563109
D1a-18	This study	JB17-D1a	Kaapvaal	S Barberton	Igneous_plutonic	Core	N	3422	31	142.7	167.6	173.3	1390	13.8884		863.946	3.63425	15.83	91.4	16.11	132.1	67.2	21.03	82.5	12.68	90.6	28.47	116.6	24.06	223.7	42.2	10130	0.456	82.5	293.2	72.1826	15.8733	2.21502	5.82755	1.76976	2.52585	20.4571	1.81807	0.505922	1.12632	0.317601	2.66671	2.82425	0.563109
D1a-19	This study	JB17-D1a	Kaapvaal	S Barberton	Igneous_plutonic	Core	N	3354	32	158.9	68.9	153.5	540	5.6964		922.946	2.10425	6.32	37.1	3.97	26.3	16.7	4.64	38.1	9.1	89.5	31.1	131.6	27.6	244	44.8	10160	0.74	119.7	347	72.1826	15.8733	2.21502	5.82755	1.76976	2.52585	20.4571	1.81807	0.505922	1.12632	0.317601	2.66671	2.82425	0.563109
D1a-21	This study	JB17-D1a	Kaapvaal	S Barberton	Igneous_plutonic	Core	N	3442	28	113.1	109	128.4	-108	9.26614		829.946	3.92425	18	117	15.1	108	46.4	27.5	64.8	11.47	91.2	27.72	111.4	22.26	204.2	36.5	9040	0.35	122.5	229.8	72.1826	15.8733	2.21502	5.82755	1.76976	2.52585	20.4571	1.81807	0.505922	1.12632	0.317601	2.66671	2.82425	0.563109
D1a-22	This study	JB17-D1a	Kaapvaal	S Barberton	Igneous_plutonic	Rim	N	3187	33	143.5	2433	376	8750	22677.1		2278.95	41.6642	56.7	312	54.6	456	297	56.3	392	53.9	325	73.9	231.1	40.5	329	53.9	8170	2.39	915	824	72.1826	15.8733	2.21502	5.82755	1.76976	2.52585	20.4571	1.81807	0.505922	1.12632	0.317601	2.66671	2.82425	0.563109
D1a-23	This study	JB17-D1a	Kaapvaal	S Barberton	Igneous_plutonic	Core	N	3387	31	153.7	412	233	490	7.26969		1184.95	3.41425	14.93	72.3	9.21	76	42.8	21.23	67.2	13.97	121.9	39.99	167.3	34.12	308.4	54.1	9210	0.652	151.3	392	72.1826	15.8733	2.21502	5.82755	1.76976	2.52585	20.4571	1.81807	0.505922	1.12632	0.317601	2.66671	2.82425	0.563109
D1a-24	This study	JB17-D1a	Kaapvaal	S Barberton	Igneous_plutonic	Core	N	3406	29	139.2	92	130.9	310	5.13218		941.946	2.29425	14.5	60	6.38	42.6	33.4	6.73	58.8	11.84	97.1	31.21	128.1	26.85	246.4	44.26	9060	0.615	143.3	274.5	72.1826	15.8733	2.21502	5.82755	1.76976	2.52585	20.4571	1.81807	0.505922	1.12632	0.317601	2.66671	2.82425	0.563109
D1a-25	This study	JB17-D1a	Kaapvaal	S Barberton	Igneous_plutonic	Core	N	3455	37	145.8	687	133	1670	58.8085		2543.95	19.9642	84.8	480	76.8	534	385	76.8	527	71.7	384	80.4	245.2	43.89	356.1	60	9100	1.07	262.8	610	72.1826	15.8733	2.21502	5.82755	1.76976	2.52585	20.4571	1.81807	0.505922	1.12632	0.317601	2.66671	2.82425	0.563109
D1a-26	This study	JB17-D1a	Kaapvaal	S Barberton	Igneous_plutonic	Core	N	3295	40	170	278	185	1290	36.457		1618.95	11.6643	33.7	170	19.8	114	71.8	20.5	120	23.2	180	55	210	41.4	346	63.2	10930	6.8	179	614	72.1826	15.8733	2.21502	5.82755	1.76976	2.52585	20.4571	1.81807	0.505922	1.12632	0.317601	2.66671	2.82425	0.563109
D1a-27	This study	JB17-D1a	Kaapvaal	S Barberton	Igneous_plutonic	Core	N	3234	31	127.5	92	1590	5030	8.05091		678.946	1.79425	6.18	46.5	5.23	39.9	21.6	8.13	36.8	7.51	65.7	21.95	94.2	20.82	194.1	35.66	9390	0.417	118.8	238.2	72.1826	15.8733	2.21502	5.82755	1.76976	2.52585	20.4571	1.81807	0.505922	1.12632	0.317601	2.66671	2.82425	0.563109
D1a-28	This study	JB17-D1a	Kaapvaal	S Barberton	Igneous_plutonic	Rim	N	3251	31	160.5	1870	169	1140	72.5884		769.946	2.75425	27.3	135	20.1	139	85	22.4	107	14.7	96.9	25.7	100.4	20.3	184.4	36	10020	0.47	61.1	301	72.1826	15.8733	2.21502	5.82755	1.76976	2.52585	20.4571	1.81807	0.505922	1.12632	0.317601	2.66671	2.82425	0.563109
D1a-29	This study	JB17-D1a	Kaapvaal	S Barberton	Igneous_plutonic	Core	N	3116	46	195	881	136	1840	43.8351		1498.95	12.6643	79	324	62.3	437	230	62.8	290	41.6	223	52.1	169	32	269	54.7	10180	0.72	143	587	72.1826	15.8733	2.21502	5.82755	1.76976	2.52585	20.4571	1.81807	0.505922	1.12632	0.317601	2.66671	2.82425	0.563109
D1a-30	This study	JB17-D1a	Kaapvaal	S Barberton	Igneous_plutonic	Core	N	3401	28	170	115	192	570	5.7398		978.946	1.61425	10.5	55.3	6.5	38.4	22.3	6.11	40.6	9.45	95.6	32.4	137	29.9	276	49.8	10760	0.62	108	349	72.1826	15.8733	2.21502	5.82755	1.76976	2.52585	20.4571	1.81807	0.505922	1.12632	0.317601	2.66671	2.82425	0.563109
D1a-31	This study	JB17-D1a	Kaapvaal	S Barberton	Igneous_plutonic	Rim	N	3348	30	167.8	102	163	470	7.12864		1232.95	3.74425	10.4	55.2	6.8	41.9	27.7	4.72	55.3	12.85	120.4	39.59	163.1	34.8	309.9	51.59	10130	1.008	187.9	415	72.1826	15.8733	2.21502	5.82755	1.76976	2.52585	20.4571	1.81807	0.505922	1.12632	0.317601	2.66671	2.82425	0.563109
D1a-32	This study	JB17-D1a	Kaapvaal	S Barberton	Igneous_plutonic	Core	N	3445	36	149.7	1506	179	5080	77.1455		2221.95	51.7642	122.4	686	117.7	846	321	298	340	44.8	276.3	71	255.4	49.3	425.1	72.7	10910	2.06	395	838	72.1826	15.8733	2.21502	5.82755	1.76976	2.52585	20.4571	1.81807	0.505922	1.12632	0.317601	2.66671	2.82425	0.563109
D1a-33	This study	JB17-D1a	Kaapvaal	S Barberton	Igneous_plutonic	Core	N	3236	38	159.8	510	149	1840	6.60782		1086.95	2.19425	6.6	38	4.8	26.4	12.2	8.6	34.3	10.1	102	36.7	159	33.97	306.1	57.9	12430	1.38	122.4	478	72.1826	15.8733	2.21502	5.82755	1.76976	2.52585	20.4571	1.81807	0.505922	1.12632	0.317601	2.66671	2.82425	0.563109
D1a-34	This study	JB17-D1a	Kaapvaal	S Barberton	Igneous_plutonic	Core	N	3444	33	164.8	117.9	172	760	19.7475		1124.95	4.56425	16.11	75.6	10.21	64.6	43.8	11.55	72.2	15.08	121.4	38.4	158.7	33	299	52.6	10740	0.75	127.5	344	72.1826	15.8733	2.21502	5.82755	1.76976	2.52585	20.4571	1.81807	0.505922	1.12632	0.317601	2.66671	2.82425	0.563109
D1a-35	This study	JB17-D1a	Kaapvaal	S Barberton	Igneous_plutonic	Core	N	3368	32	144.4	1010	144	400	15.6244		774.646	3.52425	17	102.2	12.27	73.8	37	10.89	54.5	10.33	82	26.35	108.7	22.65	209.4	40.05	8850	0.541	125.3	310.7	72.1826	15.8733	2.21502	5.82755	1.76976	2.52585	20.4571	1.81807	0.505922	1.12632	0.317601	2.66671	2.82425	0.563109
D1a-36	This study	JB17-D1a	Kaapvaal	S Barberton	Igneous_plutonic	Core	N	3238	34	165.2	187	140.1	960	14.6479		1244.95	8.02425	24	137	19.1	114	70.8	26.7	106.7	19.7	143.5	41.7	155.5	31.6	273.5	45.67	10460	1.24	292	523	72.1826	15.8733	2.21502	5.82755	1.76976	2.52585	20.4571	1.81807	0.505922	1.12632	0.317601	2.66671	2.82425	0.563109
D1a-37	This study	JB17-D1a	Kaapvaal	S Barberton	Igneous_plutonic	Rim	Y	3387	33	124.2	27.5	177.1	-5	4.22076		654.946	1.17592	0.08	15	0.1	1.4	2.8	0.81	15.5	4.96	57	21.74	97.8	21.94	211.6	40.1	9530	0.49	76.3	170	72.1826	15.8733	2.21502	5.82755	1.76976	2.52585	20.4571	1.81807	0.505922	1.12632	0.317601	2.66671	2.82425	0.563109
D1a-38	This study	JB17-D1a	Kaapvaal	S Barberton	Igneous_plutonic	Core	Y	3448	68	173	14.5	176	-120	5.15388		1028.95	2.13425	0.26	18.25	0.157	2.3	4.17	1.16	24.9	8.34	93.2	33.4	146.8	32.4	294	48.6	10660	0.69	129.1	353	72.1826	15.8733	2.21502	5.82755	1.76976	2.52585	20.4571	1.81807	0.505922	1.12632	0.317601	2.66671	2.82425	0.563109
D1a-39	This study	JB17-D1a	Kaapvaal	S Barberton	Igneous_plutonic	Core	N	3297	41	132.8	202	110.8	870	9.20104		938.946	5.75425	34.9	125.8	18	99.1	62.9	15	84.2	15.4	106.9	31.7	124.1	25.2	221.6	38.5	10130	1.31	243	468	72.1826	15.8733	2.21502	5.82755	1.76976	2.52585	20.4571	1.81807	0.505922	1.12632	0.317601	2.66671	2.82425	0.563109
D1a-40	This study	JB17-D1a	Kaapvaal	S Barberton	Igneous_plutonic	Rim	N	3201	32	151.9	217	116.1	970	5.44684		773.946	2.87425	12.5	62.5	10.14	82.4	54.8	19.4	66.9	10.58	80.3	25.7	110	23.9	230	43.8	11350	1.02	79	441	72.1826	15.8733	2.21502	5.82755	1.76976	2.52585	20.4571	1.81807	0.505922	1.12632	0.317601	2.66671	2.82425	0.563109
D1a-41	This study	JB17-D1a	Kaapvaal	S Barberton	Igneous_plutonic	Core	N	3304	31	147.2	449	150	2190	43.1841		1096.95	4.40425	51	180	23.5	128	66.5	29.4	91.7	16.26	122.8	37.2	147.4	30.34	269.1	48.8	10780	2.46	154.6	440	72.1826	15.8733	2.21502	5.82755	1.76976	2.52585	20.4571	1.81807	0.505922	1.12632	0.317601	2.66671	2.82425	0.563109
D1a-42	This study	JB17-D1a	Kaapvaal	S Barberton	Igneous_plutonic	Core	N	3412	38	147.6	1044	180	3050	38.9525		1722.95	7.93425	130.5	524	84.6	529	308	140.5	363	52.2	271	60.3	194.7	35.5	306.4	56.22	10970	1.07	378	666	72.1826	15.8733	2.21502	5.82755	1.76976	2.52585	20.4571	1.81807	0.505922	1.12632	0.317601	2.66671	2.82425	0.563109
D1a-43	This study	JB17-D1a	Kaapvaal	S Barberton	Igneous_plutonic	Core	N	3422	30	142.7	199	207	790	17.5775		908.946	5.98425	23.6	140	20.4	128	52.2	12.8	69.4	12.03	95.7	30.5	126.8	26.38	241.8	47.5	10650	0.594	124	347	72.1826	15.8733	2.21502	5.82755	1.76976	2.52585	20.4571	1.81807	0.505922	1.12632	0.317601	2.66671	2.82425	0.563109
D1a-44	This study	JB17-D1a	Kaapvaal	S Barberton	Igneous_plutonic	Core	N	3096	55	142.2	794	99	4110	5.8		1114	5.33	41	109.7	10.9	61.9	23.9	26.7	46.3	10.78	116.1	40	164.7	34.9	311	52.9	12410	2.18	323	778	72.1826	15.8733	2.21502	5.82755	1.76976	2.52585	20.4571	1.81807	0.505922	1.12632	0.317601	2.66671	2.82425	0.563109
D1a-45	This study	JB17-D1a	Kaapvaal	S Barberton	Igneous_plutonic	Core	N	3171	46	150.7	293	126.3	2720	26.7		1204	14.3	13.7	92	10.1	64	38.2	11.4	74	15.6	139.2	42.9	167.6	34.4	299.7	51.3	10800	1.59	321.9	621	72.1826	15.8733	2.21502	5.82755	1.76976	2.52585	20.4571	1.81807	0.505922	1.12632	0.317601	2.66671	2.82425	0.563109
D1a-46	This study	JB17-D1a	Kaapvaal	S Barberton	Igneous_plutonic	Core	N	3334	50	134.1	1190	223	3860	57		1960	22.6	87	455	74	487	339	97.5	420	59	344	73	225	44.3	399	67.8	12030	1.79	259	950	72.1826	15.8733	2.21502	5.82755	1.76976	2.52585	20.4571	1.81807	0.505922	1.12632	0.317601	2.66671	2.82425	0.563109
D1a-48	This study	JB17-D1a	Kaapvaal	S Barberton	Igneous_plutonic	Core	N	3201	54	162	2750	258	3100	78		1890	15.6	215	893	133	1049	451	376	480	52.1	298	69.8	222	45.1	404	71.9	12750	0.93	310	853	72.1826	15.8733	2.21502	5.82755	1.76976	2.52585	20.4571	1.81807	0.505922	1.12632	0.317601	2.66671	2.82425	0.563109
D1a-49	This study	JB17-D1a	Kaapvaal	S Barberton	Igneous_plutonic	Core	N	3389	35	157.7	99	165	660	6.4		1301	4.71	9.4	51.5	4.7	29.7	21.2	4.46	51.8	13.21	132.2	45.9	189.3	41.4	364	61.7	10080	1.34	153	406	72.1826	15.8733	2.21502	5.82755	1.76976	2.52585	20.4571	1.81807	0.505922	1.12632	0.317601	2.66671	2.82425	0.563109
D1a-50	This study	JB17-D1a	Kaapvaal	S Barberton	Igneous_plutonic	Core	N	3328	44	173.6	263	152	1250	5.2		984	2.99	2.46	30.8	1.99	13.9	9	5.58	30.2	8.49	94.4	34.1	141.9	31.7	292	48.8	10230	0.82	191	398	72.1826	15.8733	2.21502	5.82755	1.76976	2.52585	20.4571	1.81807	0.505922	1.12632	0.317601	2.66671	2.82425	0.563109
D1a-51	This study	JB17-D1a	Kaapvaal	S Barberton	Igneous_plutonic	Core	N	3284	44	140.7	51	4300	11100	5.8		625	1.87	2.84	21.4	1.59	11.3	8.8	2.74	24.3	6.32	62.6	21.2	88.7	19.7	182	34.5	10040	0.83	125	295	72.1826	15.8733	2.21502	5.82755	1.76976	2.52585	20.4571	1.81807	0.505922	1.12632	0.317601	2.66671	2.82425	0.563109
D2a-01	This study	JB17-D2a	Kaapvaal	S Barberton	Igneous_plutonic	Core	N	2828	32	139.2	515	226.8	4240	2.54982		1246.95	6.18425	1.07	5.18	0.329	1.9	2.21	1.87	13.99	6.13	87.5	37.1	169.9	40	403	76.6	11790	31	89	1079	76.1479	13.4982	1.42919	4.22613	2.82514	19.6297	10.6085	1.97305	0.378505	2.48898	2.07082	2.91048	6.83359	3.34287
D2a-02	This study	JB17-D2a	Kaapvaal	S Barberton	Igneous_plutonic	Rim	N	2672	33	115.1	649	3391	16840	3.8193		1933.95	8.70425	7.09	27.3	3.16	16.84	8.52	8	27.7	9.84	129.6	53.5	249	58.7	563	103.5	10510	12.39	165.3	1128	76.1479	13.4982	1.42919	4.22613	2.82514	19.6297	10.6085	1.97305	0.378505	2.48898	2.07082	2.91048	6.83359	3.34287
D2a-03	This study	JB17-D2a	Kaapvaal	S Barberton	Igneous_plutonic	Rim	N	3134	33	41.6	6320	3660	13860	74.3244		11908.9	50.1642	199	1100	92.7	456	270	110.5	665	187	1470	344	1091	181.9	1491	220.6	9010	27.8	705	3680	76.1479	13.4982	1.42919	4.22613	2.82514	19.6297	10.6085	1.97305	0.378505	2.48898	2.07082	2.91048	6.83359	3.34287
D2a-04	This study	JB17-D2a	Kaapvaal	S Barberton	Igneous_plutonic	Core	N	3425	33	162.5	102.4	480	3040	4.95858		2208.95	2.66425	0.65	10.99	0.423	5.17	8.69	2.98	48.4	15.6	175	64.9	284	63.2	585	105	8000	1.633	317	736	76.1479	13.4982	1.42919	4.22613	2.82514	19.6297	10.6085	1.97305	0.378505	2.48898	2.07082	2.91048	6.83359	3.34287
D2a-05	This study	JB17-D2a	Kaapvaal	S Barberton	Igneous_plutonic	Core	N	3415	27	137.3	66.2	123	60	13.3458		940.946	3.79425	10.4	61.9	7.93	56.4	45.8	7.69	73.2	12.91	103.6	30.86	127.7	26.65	243	44.9	9480	0.528	110.3	288	76.1479	13.4982	1.42919	4.22613	2.82514	19.6297	10.6085	1.97305	0.378505	2.48898	2.07082	2.91048	6.83359	3.34287
D2a-06	This study	JB17-D2a	Kaapvaal	S Barberton	Igneous_plutonic	Core	N	3245	30	150.8	42.8	128.6	280	7.92071		878.946	2.95425	1.62	23.98	0.862	6.14	6.74	1.299	25.09	7.57	82	29.33	127.8	26.52	242.1	43.56	9810	0.95	137.9	363	76.1479	13.4982	1.42919	4.22613	2.82514	19.6297	10.6085	1.97305	0.378505	2.48898	2.07082	2.91048	6.83359	3.34287
D2a-07	This study	JB17-D2a	Kaapvaal	S Barberton	Igneous_plutonic	Core	N	3220	36	200	261	399	2160	13.5629		1732.95	4.93425	7.6	28.8	2.22	13.4	7.13	3.15	31.3	10.61	135.2	53.4	258	59.1	555	120.2	10540	2.8	175.6	595	76.1479	13.4982	1.42919	4.22613	2.82514	19.6297	10.6085	1.97305	0.378505	2.48898	2.07082	2.91048	6.83359	3.34287
D2a-09	This study	JB17-D2a	Kaapvaal	S Barberton	Igneous_plutonic	Rim	N	3001	29	155.7	260	2140	7340	9.78696		1156.95	6.04425	36.9	140	14.2	82.7	45.7	12.26	79.4	16.1	139.1	41.57	157	30.18	252.8	42.5	10140	1.62	611	838	76.1479	13.4982	1.42919	4.22613	2.82514	19.6297	10.6085	1.97305	0.378505	2.48898	2.07082	2.91048	6.83359	3.34287
D2a-10	This study	JB17-D2a	Kaapvaal	S Barberton	Igneous_plutonic	Rim	N	3268	31	160.7	2910	491	6470	45.2457		2958.95	9.19425	47.7	171.9	21.3	109.6	54.9	24	122.7	31.6	279.6	87	352	71.7	640	127.7	8740	5.08	225	820	76.1479	13.4982	1.42919	4.22613	2.82514	19.6297	10.6085	1.97305	0.378505	2.48898	2.07082	2.91048	6.83359	3.34287
D2a-11	This study	JB17-D2a	Kaapvaal	S Barberton	Igneous_plutonic	Core	N	3424	45	129.7	161	134	360	9.54825		1008.95	3.94425	32.1	149	23.1	168	87.7	32.7	115.7	17.7	119.9	33.6	136	27.4	236	44.6	9250	0.62	138	254	76.1479	13.4982	1.42919	4.22613	2.82514	19.6297	10.6085	1.97305	0.378505	2.48898	2.07082	2.91048	6.83359	3.34287
D2a-12	This study	JB17-D2a	Kaapvaal	S Barberton	Igneous_plutonic	Core	N	3416	42	174.7	98	130	350	9.76525		1026.95	3.73425	8	50.8	4.02	27.1	20.1	4.07	45.7	10.38	99	34.1	148.2	32.7	301	52.9	10950	0.81	138.9	359	76.1479	13.4982	1.42919	4.22613	2.82514	19.6297	10.6085	1.97305	0.378505	2.48898	2.07082	2.91048	6.83359	3.34287
D2a-13	This study	JB17-D2a	Kaapvaal	S Barberton	Igneous_plutonic	Core	N	3097	43	161.7	859	539	2750	33.0934		3408.95	16.7643	21.2	94.5	9.69	52	38.3	6.78	111.2	34.8	317	95	341.5	67.5	585	112.6	9810	6.25	192.3	947	76.1479	13.4982	1.42919	4.22613	2.82514	19.6297	10.6085	1.97305	0.378505	2.48898	2.07082	2.91048	6.83359	3.34287
D2a-14	This study	JB17-D2a	Kaapvaal	S Barberton	Igneous_plutonic	Core	N	3186	41	155.1	241	152	1250	6.83568		800.946	2.63425	8.59	42.1	5.2	32.6	19.8	15.6	37.8	7.85	77.3	26.2	115.6	25	241	48.4	12160	0.72	89.1	424	76.1479	13.4982	1.42919	4.22613	2.82514	19.6297	10.6085	1.97305	0.378505	2.48898	2.07082	2.91048	6.83359	3.34287
D2a-15	This study	JB17-D2a	Kaapvaal	S Barberton	Igneous_plutonic	Core	N	3358	33	199	25.5	190.4	530	2.82107		1349.95	3.19425	0.97	25.8	0.367	2.95	4.99	1.94	31.8	10.76	116.8	44.4	187.2	39.8	359	60.9	12420	1.08	161.5	496	76.1479	13.4982	1.42919	4.22613	2.82514	19.6297	10.6085	1.97305	0.378505	2.48898	2.07082	2.91048	6.83359	3.34287
D2a-16	This study	JB17-D2a	Kaapvaal	S Barberton	Igneous_plutonic	Rim	N	3278	33	163.9	265	126.6	1230	19.856		1288.95	7.15425	40.2	142.7	17.4	97	57.8	20	93.6	18	138	44.4	175	35.3	304	57.5	12210	1.11	192	541	76.1479	13.4982	1.42919	4.22613	2.82514	19.6297	10.6085	1.97305	0.378505	2.48898	2.07082	2.91048	6.83359	3.34287
D2a-17	This study	JB17-D2a	Kaapvaal	S Barberton	Igneous_plutonic	Core	N	3242	31	167.6	297	560	3510	6.08701		2384.95	4.32425	3.2	19.9	1.51	8.8	8.18	3.03	38.4	13.82	172.2	69.1	311.6	70.3	665	125.1	10110	2.63	192.1	704	76.1479	13.4982	1.42919	4.22613	2.82514	19.6297	10.6085	1.97305	0.378505	2.48898	2.07082	2.91048	6.83359	3.34287
D2a-18	This study	JB17-D2a	Kaapvaal	S Barberton	Igneous_plutonic	Rim	N	3456	30	137.2	73	126	340	4.73072		732.946	1.74425	14.3	67	6.8	43	24.9	7.9	42.7	7.93	70.6	23.1	102.8	22.1	199	40.5	9960	0.317	76.1	219	76.1479	13.4982	1.42919	4.22613	2.82514	19.6297	10.6085	1.97305	0.378505	2.48898	2.07082	2.91048	6.83359	3.34287
D2a-20	This study	JB17-D2a	Kaapvaal	S Barberton	Igneous_plutonic	Core	Y	3458	42	106.5	26.9	347	23	7.02138		2808.95	2.46092	0.35	17.56	0.66	8.71	14.97	4.43	78.7	24.84	269.3	93.4	368	74.5	636.3	108.1	9080	1.155	192.2	280	76.1479	13.4982	1.42919	4.22613	2.82514	19.6297	10.6085	1.97305	0.378505	2.48898	2.07082	2.91048	6.83359	3.34287
D2a-21	This study	JB17-D2a	Kaapvaal	S Barberton	Igneous_plutonic	Rim	N	3421	33	164.7	314	152	280	16.9264		904.946	4.21425	32.7	164	24.9	156	65.4	49.8	82	12.21	98	30.6	125.6	25.94	234.9	45.17	11380	0.97	103.7	378	76.1479	13.4982	1.42919	4.22613	2.82514	19.6297	10.6085	1.97305	0.378505	2.48898	2.07082	2.91048	6.83359	3.34287
D2a-23	This study	JB17-D2a	Kaapvaal	S Barberton	Igneous_plutonic	Rim	N	3294	32	194.4	306	472	1550	5.43599		1478.95	3.48425	8.83	52.6	4.8	25.3	13.08	3.67	42.9	12.58	134.2	46.7	195	41.3	372	68.5	9710	2.27	247	440	76.1479	13.4982	1.42919	4.22613	2.82514	19.6297	10.6085	1.97305	0.378505	2.48898	2.07082	2.91048	6.83359	3.34287
D2a-24	This study	JB17-D2a	Kaapvaal	S Barberton	Igneous_plutonic	Core	N	3191	36	209.8	1741	299	2270	29.4043		3278.95	13.2643	15.7	109	12.02	80.6	69.3	20.5	225	45.3	311	80.6	300	60.8	568	111.9	11160	4.96	176	671	76.1479	13.4982	1.42919	4.22613	2.82514	19.6297	10.6085	1.97305	0.378505	2.48898	2.07082	2.91048	6.83359	3.34287
D2a-25	This study	JB17-D2a	Kaapvaal	S Barberton	Igneous_plutonic	Rim	N	3106	34	171.3	819	564	5580	3.9495		2978.95	6.34425	7.8	23.1	2.44	12	9.93	2.32	49.1	17.8	219	82.7	377	85.3	811	147.8	10650	3.75	333	1079	76.1479	13.4982	1.42919	4.22613	2.82514	19.6297	10.6085	1.97305	0.378505	2.48898	2.07082	2.91048	6.83359	3.34287
D2a-26	This study	JB17-D2a	Kaapvaal	S Barberton	Igneous_plutonic	Core	N	3280	31	207.9	273	447	1000	18.12		2417.95	6.58425	5.94	30	2.56	15.4	14	3.13	50.4	16.74	181.6	66.8	299.6	66.1	605	116	9770	1.55	158.5	480	76.1479	13.4982	1.42919	4.22613	2.82514	19.6297	10.6085	1.97305	0.378505	2.48898	2.07082	2.91048	6.83359	3.34287
D2a-27	This study	JB17-D2a	Kaapvaal	S Barberton	Igneous_plutonic	Core	N	3237	77	80	4310	1230	6200	1334.58		12608.9	88.2643	128	519	65.2	366	247	28.4	636	177	1339	342	1270	220	1750	299	6170	4.9	320	1027	76.1479	13.4982	1.42919	4.22613	2.82514	19.6297	10.6085	1.97305	0.378505	2.48898	2.07082	2.91048	6.83359	3.34287
D2a-28	This study	JB17-D2a	Kaapvaal	S Barberton	Igneous_plutonic	Core	N	3303	35	136.7	1780	179.1	5810	86.4768		2294.95	23.6642	98.4	467	69.8	507	235	95	283	42.8	286	75.6	274.9	55.6	506	90.7	11120	7.77	539	875	76.1479	13.4982	1.42919	4.22613	2.82514	19.6297	10.6085	1.97305	0.378505	2.48898	2.07082	2.91048	6.83359	3.34287
D2a-29	This study	JB17-D2a	Kaapvaal	S Barberton	Igneous_plutonic	Rim	N	3065	47	88.6	95.1	326	2580	3.41784		1912.95	5.57425	1.33	13	0.67	3.9	4.95	1.14	27.9	10.89	137.8	54.5	251.7	57.8	547	101.8	10140	4.06	220.1	772	76.1479	13.4982	1.42919	4.22613	2.82514	19.6297	10.6085	1.97305	0.378505	2.48898	2.07082	2.91048	6.83359	3.34287
D2a-30	This study	JB17-D2a	Kaapvaal	S Barberton	Igneous_plutonic	Core	N	3430	32	114.5	57.2	109	170	3.16828		628.946	2.33425	9.15	39.7	3.52	22.1	15.3	4.53	27.5	6.74	59.6	20.8	92.3	19.65	184.5	35.5	11130	0.53	59.1	222.2	76.1479	13.4982	1.42919	4.22613	2.82514	19.6297	10.6085	1.97305	0.378505	2.48898	2.07082	2.91048	6.83359	3.34287
D2a-31	This study	JB17-D2a	Kaapvaal	S Barberton	Igneous_plutonic	Core	N	3526	55	174.8	942	279	2200	46.1137		1484.95	14.4642	99.6	452	68.5	402	162.1	134.9	192	26.5	179	49.2	183.2	35.8	309	59.2	10390	0.94	178	519	76.1479	13.4982	1.42919	4.22613	2.82514	19.6297	10.6085	1.97305	0.378505	2.48898	2.07082	2.91048	6.83359	3.34287
D2a-32	This study	JB17-D2a	Kaapvaal	S Barberton	Igneous_plutonic	Core	N	3418	46	194.7	82.1	254	710	3.37444		1182.95	2.25425	1.79	14.2	0.77	4.93	3.85	3.37	21.4	7.6	93.8	36.6	172.7	40.6	398	73.9	10860	1.55	115.6	446	76.1479	13.4982	1.42919	4.22613	2.82514	19.6297	10.6085	1.97305	0.378505	2.48898	2.07082	2.91048	6.83359	3.34287
D2a-33	This study	JB17-D2a	Kaapvaal	S Barberton	Igneous_plutonic	Rim	N	3269	37	198.1	404	418	1780	6.83568		2338.95	5.03425	9.6	50	4.22	23.2	16.3	2.19	59	18.4	195	69.7	303	64.3	591	121	10470	2.36	175	616	76.1479	13.4982	1.42919	4.22613	2.82514	19.6297	10.6085	1.97305	0.378505	2.48898	2.07082	2.91048	6.83359	3.34287
D2a-34	This study	JB17-D2a	Kaapvaal	S Barberton	Igneous_plutonic	Core	Y	3462	33	124.3	7.1	310	220	2.58633		2409.95	4.00425	0.401	10.58	0.176	2.09	5.91	2.39	43.1	15.7	190.4	74.8	327	71.7	675	118.5	8190	1.37	105.1	197.3	76.1479	13.4982	1.42919	4.22613	2.82514	19.6297	10.6085	1.97305	0.378505	2.48898	2.07082	2.91048	6.83359	3.34287
D2a-35	This study	JB17-D2a	Kaapvaal	S Barberton	Igneous_plutonic	Core	N	3073	30	163.5	693	359	4680	12.6731		3418.95	8.99425	5.63	32.7	2.24	13.4	16.38	2.71	76.2	26.6	294	94.7	398	91.6	870	145.1	10800	6	268	1028	76.1479	13.4982	1.42919	4.22613	2.82514	19.6297	10.6085	1.97305	0.378505	2.48898	2.07082	2.91048	6.83359	3.34287
D2a-36	This study	JB17-D2a	Kaapvaal	S Barberton	Igneous_plutonic	Rim	N	2978	50	171.1	2050	414	8100	29.4043		2348.95	10.3643	18.3	63	5.4	26.6	16.2	11.62	46.1	15.12	181.6	67.9	329	73.2	681	136.7	9930	4.5	222	973	76.1479	13.4982	1.42919	4.22613	2.82514	19.6297	10.6085	1.97305	0.378505	2.48898	2.07082	2.91048	6.83359	3.34287
D2a-37	This study	JB17-D2a	Kaapvaal	S Barberton	Igneous_plutonic	Rim	N	3160	36	61.2	8300	796	18100	135.629		7998.95	26.4642	437	1800	188	1070	452	55	630	123	900	234	856	176	1564	280	11660	26.5	810	2750	76.1479	13.4982	1.42919	4.22613	2.82514	19.6297	10.6085	1.97305	0.378505	2.48898	2.07082	2.91048	6.83359	3.34287
D2a-38	This study	JB17-D2a	Kaapvaal	S Barberton	Igneous_plutonic	Core	N	2946	35	182	435	315	3120	7.7037		2645.95	3.86425	1.01	16.2	0.8	6.4	9.4	2.84	50.7	17.27	204.2	77.5	346.6	76.8	716	135.7	10330	2.41	250	708	76.1479	13.4982	1.42919	4.22613	2.82514	19.6297	10.6085	1.97305	0.378505	2.48898	2.07082	2.91048	6.83359	3.34287
D2a-39	This study	JB17-D2a	Kaapvaal	S Barberton	Igneous_plutonic	Rim	N	3001	45	71.1	5890	690	15600	89.1893		5488.95	16.0643	51.6	201	24.7	132.9	85	28.5	236	61.1	519	154.1	581	115.3	997	187.6	9880	6.98	807	1907	76.1479	13.4982	1.42919	4.22613	2.82514	19.6297	10.6085	1.97305	0.378505	2.48898	2.07082	2.91048	6.83359	3.34287
D2a-40	This study	JB17-D2a	Kaapvaal	S Barberton	Igneous_plutonic	Core	N	2979	37	144.4	2880	553	11300	1260		2330	19.3	20.8	83	9.1	42	19.5	12.6	58	17.9	205	75.7	326	74.4	676	131.5	10130	6.77	473	1234	76.1479	13.4982	1.42919	4.22613	2.82514	19.6297	10.6085	1.97305	0.378505	2.48898	2.07082	2.91048	6.83359	3.34287
D2a-41	This study	JB17-D2a	Kaapvaal	S Barberton	Igneous_plutonic	Core	N	3451	38	167.3	253	241	0	6.6		1079	3.05	29.1	86.2	10.6	58.3	33	30.4	48.4	11.9	111	35.8	153	32.9	295	52.2	9680	0.7	114.9	332	76.1479	13.4982	1.42919	4.22613	2.82514	19.6297	10.6085	1.97305	0.378505	2.48898	2.07082	2.91048	6.83359	3.34287
D2a-42	This study	JB17-D2a	Kaapvaal	S Barberton	Igneous_plutonic	Core	N	3317	38	173.8	176	94	800	22.8		816	3.75	19.5	144	13.7	83	56	9.1	78	13.4	99	28.8	113	24.4	222	44.1	12590	0.78	145	453	76.1479	13.4982	1.42919	4.22613	2.82514	19.6297	10.6085	1.97305	0.378505	2.48898	2.07082	2.91048	6.83359	3.34287
D2a-43	This study	JB17-D2a	Kaapvaal	S Barberton	Igneous_plutonic	Rim	N	2887	57	175.1	930	651	6200	11.5		2650	7.3	7.8	24.4	1.79	10.2	11.2	7.3	57	19.4	209	81	360	84	766	145	10650	2.77	267	983	76.1479	13.4982	1.42919	4.22613	2.82514	19.6297	10.6085	1.97305	0.378505	2.48898	2.07082	2.91048	6.83359	3.34287
D2a-44	This study	JB17-D2a	Kaapvaal	S Barberton	Igneous_plutonic	Core	N	2741	82	130.2	910	514	4500	11.4		1670	8.1	4.4	16.7	0.87	6.7	3.8	14.3	27	10.6	127	50.7	210	50	422	90	7480	2.29	188	640	76.1479	13.4982	1.42919	4.22613	2.82514	19.6297	10.6085	1.97305	0.378505	2.48898	2.07082	2.91048	6.83359	3.34287
D2a-45	This study	JB17-D2a	Kaapvaal	S Barberton	Igneous_plutonic	Rim	N	3460	120	173	20200	2050	-30000	420		2300	22.9	19.4	142	11.3	64	31	7.1	89	27	330	80	250	44	300	35	1130	1.9	145	710	76.1479	13.4982	1.42919	4.22613	2.82514	19.6297	10.6085	1.97305	0.378505	2.48898	2.07082	2.91048	6.83359	3.34287
D2a-46	This study	JB17-D2a	Kaapvaal	S Barberton	Igneous_plutonic	Core	N	3268	42	164.5	180	377	1630	9.1		1910	4	0.433	11.5	0.208	2.82	4.9	1.81	34.1	12.7	161	63	283	64.8	605	112.1	8960	2.58	221	523	76.1479	13.4982	1.42919	4.22613	2.82514	19.6297	10.6085	1.97305	0.378505	2.48898	2.07082	2.91048	6.83359	3.34287
D2a-47	This study	JB17-D2a	Kaapvaal	S Barberton	Igneous_plutonic	Core	N	3369	33	233.7	230	314	1050	6.7		1682	5.15	3.56	24.7	1.54	8.3	7.7	2.03	33.7	12.4	142.5	53.1	249	57.3	523	109.8	9940	2.58	183.1	532	76.1479	13.4982	1.42919	4.22613	2.82514	19.6297	10.6085	1.97305	0.378505	2.48898	2.07082	2.91048	6.83359	3.34287
D2a-48	This study	JB17-D2a	Kaapvaal	S Barberton	Igneous_plutonic	Core	N	3055	38	128.7	625	530	5300	17.8		2480	7.5	2.22	18.32	0.63	4	5.24	1.38	40	14.75	197	78.8	360	81.9	782	143.9	9690	4.55	440	1261	76.1479	13.4982	1.42919	4.22613	2.82514	19.6297	10.6085	1.97305	0.378505	2.48898	2.07082	2.91048	6.83359	3.34287
D2a-49	This study	JB17-D2a	Kaapvaal	S Barberton	Igneous_plutonic	Rim	N	3006	46	169	1320	441	6700	8		1970	4.88	12.62	30.6	3.41	15.9	10.3	10.6	44.7	15.1	160.6	62.1	271	60.7	582	114.2	10790	2.59	254	897	76.1479	13.4982	1.42919	4.22613	2.82514	19.6297	10.6085	1.97305	0.378505	2.48898	2.07082	2.91048	6.83359	3.34287
D2a-8	This study	JB17-D2a	Kaapvaal	S Barberton	Igneous_plutonic	Core	Y	3420	36	169.8	44	123	-90	4.42514		769.946	2.01425	0.53	21.4	0.261	2.27	3.69	1.27	21.7	6.71	74.6	26.6	115.9	26.1	252	44	10740	0.67	125.3	297	76.1479	13.4982	1.42919	4.22613	2.82514	19.6297	10.6085	1.97305	0.378505	2.48898	2.07082	2.91048	6.83359	3.34287
D3a-01	This study	JB17-D3a	Kaapvaal	S Barberton	Igneous_plutonic	Rim	N	3380	37	36	12160	278	14610	598.936		40098.9	2759.76	460	2553	243.6	1283	958	261	2022	484	3920	940	3135	552	4187	624	12080	348	1298	4020	75.2933	14.2834	0.686193	4.79068	3.95141	19.4116	10.036	1.84942	0.17287	2.25757	1.91726	2.08365	8.5088	2.97834
D3a-02	This study	JB17-D3a	Kaapvaal	S Barberton	Igneous_plutonic	Core	N	3462	32	143.9	177	578	600	21.5921		684.946	2.42425	4.75	29.8	2.53	16.9	8.5	3.13	20.4	5.34	57.1	22.05	100.6	22.62	216.7	43	11220	0.689	79.1	184.3	75.2933	14.2834	0.686193	4.79068	3.95141	19.4116	10.036	1.84942	0.17287	2.25757	1.91726	2.08365	8.5088	2.97834
D3a-03	This study	JB17-D3a	Kaapvaal	S Barberton	Igneous_plutonic	Core	N	3380	34	125.7	697	248	1320	29.0788		4488.95	60.7642	57.5	376	43	236	129	41.1	246	61.9	484	123.6	406	77.3	662	106.6	10480	11.18	311	696	75.2933	14.2834	0.686193	4.79068	3.95141	19.4116	10.036	1.84942	0.17287	2.25757	1.91726	2.08365	8.5088	2.97834
D3a-04	This study	JB17-D3a	Kaapvaal	S Barberton	Igneous_plutonic	Rim	N	3362	33	50.6	8270	230	9000	200.73		24998.9	275.764	421	2160	250	1225	663	270	1459	375	2850	612	1656	257	1773	243	17670	96.4	474	3070	75.2933	14.2834	0.686193	4.79068	3.95141	19.4116	10.036	1.84942	0.17287	2.25757	1.91726	2.08365	8.5088	2.97834
D3a-05	This study	JB17-D3a	Kaapvaal	S Barberton	Igneous_plutonic	Core	N	3454	31	136.7	163	210.6	320	25.6067		2318.95	103.164	12.5	94.6	9.05	49	38.6	6.51	100.6	24.7	235	67.8	249.6	49.7	451	75.2	9820	7.5	188.6	374	75.2933	14.2834	0.686193	4.79068	3.95141	19.4116	10.036	1.84942	0.17287	2.25757	1.91726	2.08365	8.5088	2.97834
D3a-06	This study	JB17-D3a	Kaapvaal	S Barberton	Igneous_plutonic	Rim	N	3461	38	55.4	10760	383	12450	1128.43		37598.9	3699.76	430	3130	270	1318	1098	217.9	2440	636	4950	1072	3300	540	3920	522	17120	285	2960	3730	75.2933	14.2834	0.686193	4.79068	3.95141	19.4116	10.036	1.84942	0.17287	2.25757	1.91726	2.08365	8.5088	2.97834
D3a-07	This study	JB17-D3a	Kaapvaal	S Barberton	Igneous_plutonic	Core	N	3459	31	133.4	1550	387	2190	17.6472		10278.9	697.764	126.2	1001	88.8	448	285	67.3	550	146	1176	277	873	159.7	1267	190.1	10420	40.4	619	1110	75.2933	14.2834	0.686193	4.79068	3.95141	19.4116	10.036	1.84942	0.17287	2.25757	1.91726	2.08365	8.5088	2.97834
D3a-08	This study	JB17-D3a	Kaapvaal	S Barberton	Igneous_plutonic	Core	N	3417	38	137.4	518	308	1010	69.5503		3218.95	173.764	19.6	127	15.5	84	74.9	8.05	165	44.5	352	92.4	326	63	553	96.6	8360	19.1	482	743	75.2933	14.2834	0.686193	4.79068	3.95141	19.4116	10.036	1.84942	0.17287	2.25757	1.91726	2.08365	8.5088	2.97834
D3a-09	This study	JB17-D3a	Kaapvaal	S Barberton	Igneous_plutonic	Core	N	3474	28	85.5	4610	383	9840	17.2628		21798.9	1669.76	530	3320	237	1082	834	140.2	1660	405	2800	570	1596	249	1770	250	11370	129	15300	2970	75.2933	14.2834	0.686193	4.79068	3.95141	19.4116	10.036	1.84942	0.17287	2.25757	1.91726	2.08365	8.5088	2.97834
D3a-10	This study	JB17-D3a	Kaapvaal	S Barberton	Igneous_plutonic	Rim	N	3428	29	119.5	1600	543	3590	160.584		9388.95	639.764	168	1200	124.7	650	381	168	700	163	1066	235	723	121.1	1071	160.7	8560	89.4	444	2030	75.2933	14.2834	0.686193	4.79068	3.95141	19.4116	10.036	1.84942	0.17287	2.25757	1.91726	2.08365	8.5088	2.97834
D3a-11	This study	JB17-D3a	Kaapvaal	S Barberton	Igneous_plutonic	Core	N	3312	35	144.3	548	400	1570	46.7647		3538.95	174.864	26.2	125.9	13.27	73.2	56.8	14.56	142.7	40.1	344	96	372	75.4	666	126.9	8530	15.16	499	653	75.2933	14.2834	0.686193	4.79068	3.95141	19.4116	10.036	1.84942	0.17287	2.25757	1.91726	2.08365	8.5088	2.97834
D3a-12	This study	JB17-D3a	Kaapvaal	S Barberton	Igneous_plutonic	Core	N	3369	37	39	9590	312	21600	399.29		29798.9	1850.76	478	1890	210	1041	667	255	1394	364	2882	700	2330	422	3270	469	11890	333	1600	3810	75.2933	14.2834	0.686193	4.79068	3.95141	19.4116	10.036	1.84942	0.17287	2.25757	1.91726	2.08365	8.5088	2.97834
D3a-13	This study	JB17-D3a	Kaapvaal	S Barberton	Igneous_plutonic	Rim	N	2977	39	54.1	6120	530	13600	97.9781		15448.9	247.164	473	1408	167.7	867	444	184.6	881	181.3	1321	302.4	917	148.3	1120	186.6	19030	61.2	374	2606	75.2933	14.2834	0.686193	4.79068	3.95141	19.4116	10.036	1.84942	0.17287	2.25757	1.91726	2.08365	8.5088	2.97834
D3a-14	This study	JB17-D3a	Kaapvaal	S Barberton	Igneous_plutonic	Core	N	3453	28	140.3	839	287	1420	104.597		4278.95	325.764	30.9	214	21.2	117	101.8	17.2	213	59.7	486	123.5	413	85	697	115.7	10120	21.1	149.3	926	75.2933	14.2834	0.686193	4.79068	3.95141	19.4116	10.036	1.84942	0.17287	2.25757	1.91726	2.08365	8.5088	2.97834
D3a-15	This study	JB17-D3a	Kaapvaal	S Barberton	Igneous_plutonic	Rim	N	3461	33	155.4	600	265	770	112.843		3958.95	309.764	33.9	227	23	115.9	89.2	11.48	189	53.7	467	119.3	416	82.5	708	109.3	9420	30.5	179	674	75.2933	14.2834	0.686193	4.79068	3.95141	19.4116	10.036	1.84942	0.17287	2.25757	1.91726	2.08365	8.5088	2.97834
D3a-16	This study	JB17-D3a	Kaapvaal	S Barberton	Igneous_plutonic	Rim	N	3240	33	106	2660	266	4910	264.747		10978.9	566.764	84.6	349	40.1	223	176.9	39.6	467	135.7	1125	275	900	154.9	1168	186.4	10680	55	428	1203	75.2933	14.2834	0.686193	4.79068	3.95141	19.4116	10.036	1.84942	0.17287	2.25757	1.91726	2.08365	8.5088	2.97834
D3a-17	This study	JB17-D3a	Kaapvaal	S Barberton	Igneous_plutonic	Core	N	3478	28	137.6	262	266	690	174.69		3087.95	311.764	21.7	401	16.9	86.1	80.8	9.05	180.8	49.8	380	90.7	288.2	52.7	424	68.5	9000	22	2360	651	75.2933	14.2834	0.686193	4.79068	3.95141	19.4116	10.036	1.84942	0.17287	2.25757	1.91726	2.08365	8.5088	2.97834
D3a-18	This study	JB17-D3a	Kaapvaal	S Barberton	Igneous_plutonic	Core	N	3435	29	138	628	371	2510	14.8043		4298.95	402.764	35.9	339	26.7	136.8	119	19.1	268	67.1	502	120.6	404	76.3	644	111.3	7700	42.2	2080	938	75.2933	14.2834	0.686193	4.79068	3.95141	19.4116	10.036	1.84942	0.17287	2.25757	1.91726	2.08365	8.5088	2.97834
D3a-19	This study	JB17-D3a	Kaapvaal	S Barberton	Igneous_plutonic	Rim	N	3472	36	28.2	11860	198	18200	643.422		42498.9	1312.76	885	8310	1224	8320	4050	1791	5350	951	5590	1019	2650	391	2720	377	18510	168.3	4010	4130	75.2933	14.2834	0.686193	4.79068	3.95141	19.4116	10.036	1.84942	0.17287	2.25757	1.91726	2.08365	8.5088	2.97834
D3a-20	This study	JB17-D3a	Kaapvaal	S Barberton	Igneous_plutonic	Core	N	3433	32	147.9	235.9	344	650	53.3834		2378.95	126.164	15.83	126.1	9.21	50	45	8.58	104.2	30.3	258	68.7	257.9	53.4	463	91	8510	15.27	280	460	75.2933	14.2834	0.686193	4.79068	3.95141	19.4116	10.036	1.84942	0.17287	2.25757	1.91726	2.08365	8.5088	2.97834
D3a-21	This study	JB17-D3a	Kaapvaal	S Barberton	Igneous_plutonic	Rim	N	3365	29	47.5	6640	3630	23800	358.059		26388.9	897.764	2120	9170	694	3580	2598	160	4160	839	4710	756	1718	222.2	1426	195.5	23200	104.7	6440	2544	75.2933	14.2834	0.686193	4.79068	3.95141	19.4116	10.036	1.84942	0.17287	2.25757	1.91726	2.08365	8.5088	2.97834
D3a-22	This study	JB17-D3a	Kaapvaal	S Barberton	Igneous_plutonic	Core	N	3147	63	66	9650	523	13170	128.033		19328.9	417.764	385	1427	159.5	829	739	188.4	1753	387	2542	512	1436	221.1	1616	244.5	21820	91.9	1422	2685	75.2933	14.2834	0.686193	4.79068	3.95141	19.4116	10.036	1.84942	0.17287	2.25757	1.91726	2.08365	8.5088	2.97834
D3a-23	This study	JB17-D3a	Kaapvaal	S Barberton	Igneous_plutonic	Core	N	3370	32	149.3	783	343	1490	31.5743		2788.95	107.764	26.1	102	11.5	56.7	50.2	23.3	115	31.9	301	78.1	293	59.6	504	96.3	7760	6.27	175	440	75.2933	14.2834	0.686193	4.79068	3.95141	19.4116	10.036	1.84942	0.17287	2.25757	1.91726	2.08365	8.5088	2.97834
D3a-24	This study	JB17-D3a	Kaapvaal	S Barberton	Igneous_plutonic	Core	N	3403	38	117.7	1201	338	2370	164.924		6918.95	424.764	59.9	410	45.7	238	195	26	389	102	787	195	635	114.2	931	158.9	9120	50.8	638	1364	75.2933	14.2834	0.686193	4.79068	3.95141	19.4116	10.036	1.84942	0.17287	2.25757	1.91726	2.08365	8.5088	2.97834
D3a-25	This study	JB17-D3a	Kaapvaal	S Barberton	Igneous_plutonic	Core	N	3461	31	73.3	7050	420	11340	1179.43		27498.9	2549.76	637	2760	260	1274	948	128.5	1871	481	3640	786	2387	409	3130	448	9950	379	18400	2700	75.2933	14.2834	0.686193	4.79068	3.95141	19.4116	10.036	1.84942	0.17287	2.25757	1.91726	2.08365	8.5088	2.97834
D3a-26	This study	JB17-D3a	Kaapvaal	S Barberton	Igneous_plutonic	Core	N	3487	36	125.6	890	426	1920	211.581		5668.95	401.764	56.4	290	36.8	196	155	20.9	341	91.7	727	158	471	95.6	823	125.2	8470	20.7	267	1480	75.2933	14.2834	0.686193	4.79068	3.95141	19.4116	10.036	1.84942	0.17287	2.25757	1.91726	2.08365	8.5088	2.97834
D3a-27	This study	JB17-D3a	Kaapvaal	S Barberton	Igneous_plutonic	Rim	N	3433	31	39.8	12920	202	22600	391.695		38998.9	2959.76	1131	4510	471	2483	2009	555	4470	974	5390	976	2450	410	3100	436	11240	434	7780	4400	75.2933	14.2834	0.686193	4.79068	3.95141	19.4116	10.036	1.84942	0.17287	2.25757	1.91726	2.08365	8.5088	2.97834
D3a-28	This study	JB17-D3a	Kaapvaal	S Barberton	Igneous_plutonic	Core	N	3196	75	51	13350	297	15380	301.638		34698.9	2305.76	764	2587	295	1404	958	339.1	1834	468	3570	866	2980	575	4740	646	9180	171.8	1874	4047	75.2933	14.2834	0.686193	4.79068	3.95141	19.4116	10.036	1.84942	0.17287	2.25757	1.91726	2.08365	8.5088	2.97834
12-08_z13.1dc	Turkina et al. (2012)	12-08	Siberia	Irkut	Igneous_plutonic	Core	N	2545	25							1868		104.5	350.7	56.4	297.7	98.7	23.3	113.1		149		301.4		743.4	129.6	12229		846	2500	62.96	15.5	3.18	4.44	2.63	10.4	31	4	1.03	3.2	0.95	3.7	11.2	1.68
12-08_z14.1dc	Turkina et al. (2012)	12-08	Siberia	Irkut	Igneous_plutonic	Core	N	2532	25							1178		6.59	29.5	4.35	25.1	7.7	2.21	16.6		64.8		200.9		552.3	104.3	13969		131	2424	62.96	15.5	3.18	4.44	2.63	10.4	31	4	1.03	3.2	0.95	3.7	11.2	1.68
12-08_z4.1c	Turkina et al. (2012)	12-08	Siberia	Irkut	Igneous_plutonic	Core	Y	2704	25							409		0.1	24.1	0.1	1.2	2.57	0.46	10.9		31.4		60.9		112.2	18.4	7092		78	273	62.96	15.5	3.18	4.44	2.63	10.4	31	4	1.03	3.2	0.95	3.7	11.2	1.68
12-08_z5.1c	Turkina et al. (2012)	12-08	Siberia	Irkut	Igneous_plutonic	Core	Y	2680	25							1171		0.21	27.6	0.49	8	11	1.87	41.2		102.4		172.9		263.3	41	6608		155	253	62.96	15.5	3.18	4.44	2.63	10.4	31	4	1.03	3.2	0.95	3.7	11.2	1.68
12-08_z8.1c	Turkina et al. (2012)	12-08	Siberia	Irkut	Igneous_plutonic	Core	N	2620	25							786		45.96	383.4	35.27	218.9	77.66	14.41	90.6		86.3		108.4		193	31.6	7396		627	636	62.96	15.5	3.18	4.44	2.63	10.4	31	4	1.03	3.2	0.95	3.7	11.2	1.68
12-08_z9.1c	Turkina et al. (2012)	12-08	Siberia	Irkut	Igneous_plutonic	Core	Y	2664	25							760		0.21	22.8	0.33	4.3	5.81	1.85	20.7		59.8		118.8		226.4	40.2	7236		142	361	62.96	15.5	3.18	4.44	2.63	10.4	31	4	1.03	3.2	0.95	3.7	11.2	1.68
10-1	Kielman et al. (2018)	409004	NAC-Nuuk	Itsaq GC	Igneous_plutonic	Core	Y	3724.92	9.58477					2.73677				0.190057	6.98277	0.162734	1.55833	3.42066	0.915695	14.6775		58.3469		87.7534		164.317				41.6904	191.921	69.79	16.7	3.94	5.22	0.93	2.9	5.81	1.3	0.48	0.91	0.28	3.2	0.77	0.32
10-2	Kielman et al. (2018)	409004	NAC-Nuuk	Itsaq GC	Igneous_plutonic	Core	N	3766.92	5.33384					6.34129				1.33575	16.5871	1.02941	7.06005	6.13168	1.58658	15.7231		48.432		65.8531		110.268				119.109	388.52	69.79	16.7	3.94	5.22	0.93	2.9	5.81	1.3	0.48	0.91	0.28	3.2	0.77	0.32
10-3	Kielman et al. (2018)	409004	NAC-Nuuk	Itsaq GC	Igneous_plutonic	Core	N	3809.85	35.0724					5.57369				7.92884	48.9899	9.03846	62.4334	25.2232	17.3395	46.0789		70.477		91.419		165.55				34.3299	180.877	69.79	16.7	3.94	5.22	0.93	2.9	5.81	1.3	0.48	0.91	0.28	3.2	0.77	0.32
12-1	Kielman et al. (2018)	409004	NAC-Nuuk	Itsaq GC	Igneous_plutonic	Core	N	3789.29	12.7475					4.74916				14.9621	59.3059	7.73432	51.3496	27.2736	22.0563	47.591		58.2836		66.0039		118.344				63.3988	345.798	69.79	16.7	3.94	5.22	0.93	2.9	5.81	1.3	0.48	0.91	0.28	3.2	0.77	0.32
12-2	Kielman et al. (2018)	409004	NAC-Nuuk	Itsaq GC	Igneous_plutonic	Core	N	3806.38	4.71761					8.03117				7.01006	30.592	3.24307	20.8395	12.0761	10.6855	19.7482		50.0948		73.161		137.771				132.165	616.759	69.79	16.7	3.94	5.22	0.93	2.9	5.81	1.3	0.48	0.91	0.28	3.2	0.77	0.32
14-1	Kielman et al. (2018)	409004	NAC-Nuuk	Itsaq GC	Igneous_plutonic	Rim	N	3586.14	2.59044					5.45102				7.96058	48.6199	5.44208	41.7898	22.1657	19.229	31.2452		61.6921		111.399		264.601				31.6374	2054.44	69.79	16.7	3.94	5.22	0.93	2.9	5.81	1.3	0.48	0.91	0.28	3.2	0.77	0.32
14-2	Kielman et al. (2018)	409004	NAC-Nuuk	Itsaq GC	Igneous_plutonic	Core	N	3683.96	7.81797					2.90218				0.952016	7.43231	0.598392	3.47791	3.22542	0.423361	10.6649		37.5774		57.0765		106.407				33.0472	1827.43	69.79	16.7	3.94	5.22	0.93	2.9	5.81	1.3	0.48	0.91	0.28	3.2	0.77	0.32
15-1	Kielman et al. (2018)	409004	NAC-Nuuk	Itsaq GC	Igneous_plutonic	Core	N	3591.65	2.1846					3.34829				0.983951	12.3704	0.663667	4.98728	5.51084	0.789105	18.4814		68.5727		105.391		178.786				30.0024	1983.62	69.79	16.7	3.94	5.22	0.93	2.9	5.81	1.3	0.48	0.91	0.28	3.2	0.77	0.32
15-2	Kielman et al. (2018)	409004	NAC-Nuuk	Itsaq GC	Igneous_plutonic	Rim	Y							2.39518				0.12389	5.4776	0.0594763	0.471186	1.86853	0.121668	6.99915		46.5053		97.6723		224.487						69.79	16.7	3.94	5.22	0.93	2.9	5.81	1.3	0.48	0.91	0.28	3.2	0.77	0.32
25-1	Kielman et al. (2018)	409004	NAC-Nuuk	Itsaq GC	Igneous_plutonic	Core	N							12.8676				6.18037	40.8761	4.49641	34.7783	18.8291	14.6232	36.933		89.6051		120.291		198.993						69.79	16.7	3.94	5.22	0.93	2.9	5.81	1.3	0.48	0.91	0.28	3.2	0.77	0.32
25-2	Kielman et al. (2018)	409004	NAC-Nuuk	Itsaq GC	Igneous_plutonic	Core	N							8.87383				2.07317	19.0238	1.29866	8.92099	6.23609	2.44318	19.9686		54.1127		71.7716		120.783						69.79	16.7	3.94	5.22	0.93	2.9	5.81	1.3	0.48	0.91	0.28	3.2	0.77	0.32
26-1	Kielman et al. (2018)	409004	NAC-Nuuk	Itsaq GC	Igneous_plutonic	Core	Y	3753.32	24.6591					2.84138				0.00133157	9.92253	0.0313456	0.598498	2.81933	0.463902	11.5968		54.4284		78.2172		145.834				20.3272	115.76	69.79	16.7	3.94	5.22	0.93	2.9	5.81	1.3	0.48	0.91	0.28	3.2	0.77	0.32
26-2	Kielman et al. (2018)	409004	NAC-Nuuk	Itsaq GC	Igneous_plutonic	Core	Y	3799.44	7.86196					3.49973				0.00723633	7.35003	0.0334177	0.740896	3.17976	0.535937	12.5624		54.4568		85.8858		149.786				39.5415	203.369	69.79	16.7	3.94	5.22	0.93	2.9	5.81	1.3	0.48	0.91	0.28	3.2	0.77	0.32
27-1	Kielman et al. (2018)	409004	NAC-Nuuk	Itsaq GC	Igneous_plutonic	Core	N	3591.24	5.44641					7.60524				7.45589	29.4728	2.85784	19.1598	12.8317	7.61546	30.2548		69.7013		92.3576		160.206				26.9878	2323.46	69.79	16.7	3.94	5.22	0.93	2.9	5.81	1.3	0.48	0.91	0.28	3.2	0.77	0.32
27-2	Kielman et al. (2018)	409004	NAC-Nuuk	Itsaq GC	Igneous_plutonic	Core	Y	3593.38	2.94916					2.48518				0.00243937	12.9909	0.0403547	0.939936	3.26183	0.588055	16.1187		80.0982		130.579		239.603				42.6527	2935.67	69.79	16.7	3.94	5.22	0.93	2.9	5.81	1.3	0.48	0.91	0.28	3.2	0.77	0.32
3-1	Kielman et al. (2018)	409004	NAC-Nuuk	Itsaq GC	Igneous_plutonic	Mixed	N	3792.98	18.892					8.20818				43.9034	204.345	28.7497	198.973	90.1285	74.492	139.635		79.0761		83.3663		176.663				17.8993	90.4169	69.79	16.7	3.94	5.22	0.93	2.9	5.81	1.3	0.48	0.91	0.28	3.2	0.77	0.32
31-1	Kielman et al. (2018)	409004	NAC-Nuuk	Itsaq GC	Igneous_plutonic	Core	Y	3823.26	8.19339					5.70207				0.00569772	19.2205	0.0700641	1.61269	5.18614	1.37279	32.0894		133.2		195.912		345.739				58.2888	282.923	69.79	16.7	3.94	5.22	0.93	2.9	5.81	1.3	0.48	0.91	0.28	3.2	0.77	0.32
3-2	Kielman et al. (2018)	409004	NAC-Nuuk	Itsaq GC	Igneous_plutonic	Core	Y	3594.5	5.12371					3.84473				0.00293111	6.46604	0.0265525	0.632619	2.7079	0.570849	10.2925		42.3537		67.0373		118.818				41.9414	2873.27	69.79	16.7	3.94	5.22	0.93	2.9	5.81	1.3	0.48	0.91	0.28	3.2	0.77	0.32
3-3	Kielman et al. (2018)	409004	NAC-Nuuk	Itsaq GC	Igneous_plutonic	Core	Y	3603.67	2.38849					3.08002				0.279138	12.5676	0.203472	2.06781	3.71001	1.1928	19.5987		64.9644		100.723		179.935				34.9661	2153.16	69.79	16.7	3.94	5.22	0.93	2.9	5.81	1.3	0.48	0.91	0.28	3.2	0.77	0.32
40-1	Kielman et al. (2018)	409004	NAC-Nuuk	Itsaq GC	Igneous_plutonic	Core	Y	3754.37	11.6879					3.92223				0.319751	11.1882	0.416083	3.72087	3.86581	1.33104	17.9571		62.624		101.988		196.374				38.9299	176.097	69.79	16.7	3.94	5.22	0.93	2.9	5.81	1.3	0.48	0.91	0.28	3.2	0.77	0.32
48-2	Kielman et al. (2018)	409004	NAC-Nuuk	Itsaq GC	Igneous_plutonic	Core	Y	3800.61	8.51776					3.70083				0.0024175	10.3728	0.0380789	0.915756	3.36089	0.633893	17.1432		77.2118		115.199		187.794				46.6872	224.565	69.79	16.7	3.94	5.22	0.93	2.9	5.81	1.3	0.48	0.91	0.28	3.2	0.77	0.32
52-1	Kielman et al. (2018)	409004	NAC-Nuuk	Itsaq GC	Igneous_plutonic	Core	Y	3748.71	8.07109					3.03121				0.00416325	5.66837	0.0288891	0.597485	2.55214	0.403729	10.0459		46.82		75.8017		142.13				100.407	260.066	69.79	16.7	3.94	5.22	0.93	2.9	5.81	1.3	0.48	0.91	0.28	3.2	0.77	0.32
54-1	Kielman et al. (2018)	409004	NAC-Nuuk	Itsaq GC	Igneous_plutonic	Core	Y	3777.54	14.5532					3.00195				0.146056	12.634	0.106869	1.13451	3.33928	0.493039	13.6095		54.9708		81.5322		142.037				32.7531	137.508	69.79	16.7	3.94	5.22	0.93	2.9	5.81	1.3	0.48	0.91	0.28	3.2	0.77	0.32
54-2	Kielman et al. (2018)	409004	NAC-Nuuk	Itsaq GC	Igneous_plutonic	Core	Y	3792.75	13.7951					3.91086				0.00309442	6.7076	0.0228572	0.546666	2.27689	0.340898	10.5167		49.6786		84.604		160.687				28.4819	136.852	69.79	16.7	3.94	5.22	0.93	2.9	5.81	1.3	0.48	0.91	0.28	3.2	0.77	0.32
57-1	Kielman et al. (2018)	409004	NAC-Nuuk	Itsaq GC	Igneous_plutonic	Core	Y	3758.9	9.12245					4.47944				0.00237423	7.53577	0.028261	0.687497	3.03793	0.498799	13.7267		56.4288		89.0766		159.005				47.949	207.232	69.79	16.7	3.94	5.22	0.93	2.9	5.81	1.3	0.48	0.91	0.28	3.2	0.77	0.32
60-2	Kielman et al. (2018)	409004	NAC-Nuuk	Itsaq GC	Igneous_plutonic	Core	Y	3820.43	7.18869					3.48699				0.0124464	4.7844	0.0338943	0.434743	1.85446	0.201283	5.01883		20.9761		30.621		51.9982				110.444	372.879	69.79	16.7	3.94	5.22	0.93	2.9	5.81	1.3	0.48	0.91	0.28	3.2	0.77	0.32
60-3	Kielman et al. (2018)	409004	NAC-Nuuk	Itsaq GC	Igneous_plutonic	Core	Y	3821.25	4.22181					6.45023				0.0099985	8.23305	0.0348599	0.710531	2.85106	0.512886	13.405		60.9524		101.683		190.563				321.687	626.69	69.79	16.7	3.94	5.22	0.93	2.9	5.81	1.3	0.48	0.91	0.28	3.2	0.77	0.32
6-1	Kielman et al. (2018)	409004	NAC-Nuuk	Itsaq GC	Igneous_plutonic	Core	N	3805.23	9.92699					7.599				0.684568	21.6258	0.406214	3.82188	6.41323	1.30613	26.2914		87.7866		123.127		199.021				72.6387	242.504	69.79	16.7	3.94	5.22	0.93	2.9	5.81	1.3	0.48	0.91	0.28	3.2	0.77	0.32
61-1	Kielman et al. (2018)	409004	NAC-Nuuk	Itsaq GC	Igneous_plutonic	Core	N	3808.65	43.59					3.61155				3.78758	22.6404	2.31046	13.2859	8.24649	4.06792	21.548		66.9628		100.837		183.105				32.8238	140.103	69.79	16.7	3.94	5.22	0.93	2.9	5.81	1.3	0.48	0.91	0.28	3.2	0.77	0.32
61-2	Kielman et al. (2018)	409004	NAC-Nuuk	Itsaq GC	Igneous_plutonic	Core	N							5.94212				5.17337	47.0903	3.5833	18.5742	8.94829	4.71619	34.2529		142.613		208.771		351.428						69.79	16.7	3.94	5.22	0.93	2.9	5.81	1.3	0.48	0.91	0.28	3.2	0.77	0.32
61-3	Kielman et al. (2018)	409004	NAC-Nuuk	Itsaq GC	Igneous_plutonic	Core	Y							2.96822				0.00256715	18.3234	0.0194368	0.695377	3.58974	0.589038	18.2998		78.2118		123.375		203.242						69.79	16.7	3.94	5.22	0.93	2.9	5.81	1.3	0.48	0.91	0.28	3.2	0.77	0.32
6-2	Kielman et al. (2018)	409004	NAC-Nuuk	Itsaq GC	Igneous_plutonic	Core	N	3817.55	4.81425					17.6043				4.22503	30.1701	2.27221	13.2414	10.263	1.44856	26.8972		89.1762		115.351		196.006				101.859	522.359	69.79	16.7	3.94	5.22	0.93	2.9	5.81	1.3	0.48	0.91	0.28	3.2	0.77	0.32
62-1	Kielman et al. (2018)	409004	NAC-Nuuk	Itsaq GC	Igneous_plutonic	Core	Y	3791.31	7.36162					20.22				0.00637294	13.8498	0.074219	1.86585	5.69826	1.62717	29.5713		133.619		197.586		345.527				47.4735	179.589	69.79	16.7	3.94	5.22	0.93	2.9	5.81	1.3	0.48	0.91	0.28	3.2	0.77	0.32
64-1	Kielman et al. (2018)	409004	NAC-Nuuk	Itsaq GC	Igneous_plutonic	Core	N	3733.12	13.0691					4.17173				10.5107	35.7668	4.45541	28.9964	15.1326	7.52939	26.252		42.9435		62.8058		123.599				27.3492	161.68	69.79	16.7	3.94	5.22	0.93	2.9	5.81	1.3	0.48	0.91	0.28	3.2	0.77	0.32
64-2	Kielman et al. (2018)	409004	NAC-Nuuk	Itsaq GC	Igneous_plutonic	Core	N	3746.24	10.8523					4.42592				3.70038	18.6125	1.76929	13.3608	10.1681	4.84805	31.4907		66.8195		86.6201		145.676				51.0932	303.089	69.79	16.7	3.94	5.22	0.93	2.9	5.81	1.3	0.48	0.91	0.28	3.2	0.77	0.32
64-3	Kielman et al. (2018)	409004	NAC-Nuuk	Itsaq GC	Igneous_plutonic	Rim	N							10.1297				50.6188	188.538	32.163	196.84	98.7259	26.9975	161.5		112.886		82.98		181.614						69.79	16.7	3.94	5.22	0.93	2.9	5.81	1.3	0.48	0.91	0.28	3.2	0.77	0.32
64-4	Kielman et al. (2018)	409004	NAC-Nuuk	Itsaq GC	Igneous_plutonic	Core	Y							6.02757				0.0191187	10.5958	0.045956	0.951293	3.58604	0.684717	17.3358		75.0485		111.823		196.724						69.79	16.7	3.94	5.22	0.93	2.9	5.81	1.3	0.48	0.91	0.28	3.2	0.77	0.32
66-1	Kielman et al. (2018)	409004	NAC-Nuuk	Itsaq GC	Igneous_plutonic	Core	N	3796.95	5.66405					4.40406				5.51801	24.0964	2.3919	17.9648	11.6278	6.66246	32.5226		86.409		130.34		224.796				146.649	462.465	69.79	16.7	3.94	5.22	0.93	2.9	5.81	1.3	0.48	0.91	0.28	3.2	0.77	0.32
66-2	Kielman et al. (2018)	409004	NAC-Nuuk	Itsaq GC	Igneous_plutonic	Core	Y	3811.04	12.148					2.1963				0.00218974	6.01443	0.0136461	0.368084	2.21988	0.262516	7.33146		30.1673		42.0169		70.4955				71.2759	276.247	69.79	16.7	3.94	5.22	0.93	2.9	5.81	1.3	0.48	0.91	0.28	3.2	0.77	0.32
69-1	Kielman et al. (2018)	409004	NAC-Nuuk	Itsaq GC	Igneous_plutonic	Core	N	3828.8	36.0205					3.20666				0.677728	10.3046	0.360453	3.25423	3.53686	2.31586	10.4856		38.7848		52.8719		84.6655				93.3144	464.848	69.79	16.7	3.94	5.22	0.93	2.9	5.81	1.3	0.48	0.91	0.28	3.2	0.77	0.32
69-2	Kielman et al. (2018)	409004	NAC-Nuuk	Itsaq GC	Igneous_plutonic	Core	N							4.13278				0.578688	15.0662	0.586307	4.58564	5.76293	1.00556	21.9016		95.2341		149.553		255.941						69.79	16.7	3.94	5.22	0.93	2.9	5.81	1.3	0.48	0.91	0.28	3.2	0.77	0.32
75-1	Kielman et al. (2018)	409004	NAC-Nuuk	Itsaq GC	Igneous_plutonic	Core	Y	3728.06	15.4251					3.54139				0.00419237	6.29449	0.0282518	0.583904	2.94093	0.498477	12.5499		55.6392		79.7576		136.263				20.0834	107.932	69.79	16.7	3.94	5.22	0.93	2.9	5.81	1.3	0.48	0.91	0.28	3.2	0.77	0.32
75-2	Kielman et al. (2018)	409004	NAC-Nuuk	Itsaq GC	Igneous_plutonic	Core	Y	3800.05	4.96346					4.71997				0.00167848	10.0982	0.0322801	0.876854	3.45937	0.549056	15.8375		68.2163		105.456		170.64				105.966	384.788	69.79	16.7	3.94	5.22	0.93	2.9	5.81	1.3	0.48	0.91	0.28	3.2	0.77	0.32
77-2	Kielman et al. (2018)	409004	NAC-Nuuk	Itsaq GC	Igneous_plutonic	Core	N	3800.59	9.70202					6.76918				0.879007	18.1653	0.591488	5.0304	6.23419	2.53117	24.8417		92.9787		141.545		254.476				46.1205	201.497	69.79	16.7	3.94	5.22	0.93	2.9	5.81	1.3	0.48	0.91	0.28	3.2	0.77	0.32
81-1	Kielman et al. (2018)	409004	NAC-Nuuk	Itsaq GC	Igneous_plutonic	Core	Y	3814.72	20.665					2.95484				0.283095	20.3655	0.183663	1.71316	3.62469	0.514965	20.0925		91.5707		128.887		208.836				31.7541	162.979	69.79	16.7	3.94	5.22	0.93	2.9	5.81	1.3	0.48	0.91	0.28	3.2	0.77	0.32
81-2	Kielman et al. (2018)	409004	NAC-Nuuk	Itsaq GC	Igneous_plutonic	Core	Y	3745.14	8.94574					2.98939				0.00122219	7.90995	0.0300299	0.786996	2.9451	0.52913	15.5148		68.1233		94.4868		157.783				49.72	166.912	69.79	16.7	3.94	5.22	0.93	2.9	5.81	1.3	0.48	0.91	0.28	3.2	0.77	0.32
9-1	Kielman et al. (2018)	409004	NAC-Nuuk	Itsaq GC	Igneous_plutonic	Core	N	3771.53	23.7642					2.43126				1.16889	20.0927	0.754532	4.97976	5.83034	0.855608	21.9762		78.0571		103.841		167.758				23.5023	137.561	69.79	16.7	3.94	5.22	0.93	2.9	5.81	1.3	0.48	0.91	0.28	3.2	0.77	0.32
9-2	Kielman et al. (2018)	409004	NAC-Nuuk	Itsaq GC	Igneous_plutonic	Core	Y	3813.22	9.23215					6.88135				0.00644503	11.6105	0.0238842	0.583632	3.29573	0.38727	18.3679		91.1242		141.879		253.414				41.2608	235.237	69.79	16.7	3.94	5.22	0.93	2.9	5.81	1.3	0.48	0.91	0.28	3.2	0.77	0.32
10C-0.0s	Nutman et al. (2007)	G01/113	NAC-Nuuk	Itsaq GC	Igneous_plutonic	N/A	N	3863				209	-1			1354		80.33	203.24	26.08	109.21	49.48	6.66	91.91	17.5	162.53	46.78	197.88	36.03	314.52	55.6			154.871	515.744	69.59	15.54	4.38	3.12	1.57	3.3		1.69	0.54	1.25	0.29	3.79	2.1	0.3
10C-10.0s	Nutman et al. (2007)	G01/113	NAC-Nuuk	Itsaq GC	Igneous_plutonic	N/A	N	3808				232	0.71			777		38.29	73.59	10.13	31.43	12.36	2.19	27.1	7	80	26.02	109.7	22.65	197.12	37.13			65.1591	327.405	69.59	15.54	4.38	3.12	1.57	3.3		1.69	0.54	1.25	0.29	3.79	2.1	0.3
10C-12.5s	Nutman et al. (2007)	G01/113	NAC-Nuuk	Itsaq GC	Igneous_plutonic	N/A	N	3812				430	-1			795		45.97	84.02	11.86	41.55	12.21	2.4	28.96	6.8	76.56	25.41	109.57	23.37	197.88	37.97			60.3444	382.395	69.59	15.54	4.38	3.12	1.57	3.3		1.69	0.54	1.25	0.29	3.79	2.1	0.3
10C-15.0s	Nutman et al. (2007)	G01/113	NAC-Nuuk	Itsaq GC	Igneous_plutonic	N/A	N	3812				685	0.96			799		53.5	94.24	11.06	45.57	11.44	1.73	30.25	6.4	81.91	26.18	109.01	22.17	196.74	36.09			60.3444	386.598	69.59	15.54	4.38	3.12	1.57	3.3		1.69	0.54	1.25	0.29	3.79	2.1	0.3
10C-17.5s	Nutman et al. (2007)	G01/113	NAC-Nuuk	Itsaq GC	Igneous_plutonic	N/A	N	3855				922	-1			884		61.33	121.66	14.7	51.53	13.15	2	33.23	7.57	77.94	27.51	121.54	24.66	223.71	42.29			59.2631	418.899	69.59	15.54	4.38	3.12	1.57	3.3		1.69	0.54	1.25	0.29	3.79	2.1	0.3
10C-2.5s	Nutman et al. (2007)	G01/113	NAC-Nuuk	Itsaq GC	Igneous_plutonic	N/A	N	3855				452	-1			1459		108.73	270.56	33.06	162.94	84.52	8.95	120.29	20.9	191.33	50.99	206.38	38.27	322.71	57.26			176.58	510.334	69.59	15.54	4.38	3.12	1.57	3.3		1.69	0.54	1.25	0.29	3.79	2.1	0.3
10C-20.0s	Nutman et al. (2007)	G01/113	NAC-Nuuk	Itsaq GC	Igneous_plutonic	N/A	N	3737				341	-1			614		64.01	107.77	14.17	52.91	12.06	2.6	22.42	6.38	64.99	17.33	82.82	16.1	149.91	26.33			46.8948	207.9	69.59	15.54	4.38	3.12	1.57	3.3		1.69	0.54	1.25	0.29	3.79	2.1	0.3
10C-22.5s	Nutman et al. (2007)	G01/113	NAC-Nuuk	Itsaq GC	Igneous_plutonic	N/A	N	3716				1006	1.01			702		76.24	137.65	17.87	57.94	19.9	2.38	26.9	7.28	65.58	22.14	93.66	18.51	170.29	31.47			57.657	245.616	69.59	15.54	4.38	3.12	1.57	3.3		1.69	0.54	1.25	0.29	3.79	2.1	0.3
10C-25.0s	Nutman et al. (2007)	G01/113	NAC-Nuuk	Itsaq GC	Igneous_plutonic	N/A	N	3746				464	-1			687		83.9	159.54	21.35	72.63	16.17	3.22	32.72	7.67	75.02	22.22	101.56	18.85	171.56	33.07			60.1483	264.12	69.59	15.54	4.38	3.12	1.57	3.3		1.69	0.54	1.25	0.29	3.79	2.1	0.3
10C-27.5s	Nutman et al. (2007)	G01/113	NAC-Nuuk	Itsaq GC	Igneous_plutonic	N/A	N	3720				354	3.56			621		99.4	173.02	23.02	82.36	16.81	2.08	34.76	6.52	60.97	19.37	74.48	17.21	154.03	28.03			46.8555	215.145	69.59	15.54	4.38	3.12	1.57	3.3		1.69	0.54	1.25	0.29	3.79	2.1	0.3
10C-30.0s	Nutman et al. (2007)	G01/113	NAC-Nuuk	Itsaq GC	Igneous_plutonic	N/A	N	3824				304	-1			537		109.36	201.28	25.25	86.64	19.7	2.1	33.98	5.21	49.32	16.12	70.43	14.12	127.39	24.4			37.4357	183.402	69.59	15.54	4.38	3.12	1.57	3.3		1.69	0.54	1.25	0.29	3.79	2.1	0.3
10C-32.5s	Nutman et al. (2007)	G01/113	NAC-Nuuk	Itsaq GC	Igneous_plutonic	N/A	N	3690				700	-1			481		100.8	182.69	25.32	74.41	18.86	2.92	27.62	5.18	44.02	14.19	59.31	12.05	120.14	21.57			33.5901	182.935	69.59	15.54	4.38	3.12	1.57	3.3		1.69	0.54	1.25	0.29	3.79	2.1	0.3
10C-35.0s	Nutman et al. (2007)	G01/113	NAC-Nuuk	Itsaq GC	Igneous_plutonic	N/A	N	3667				-1	-1			510		95.39	191.67	24.15	84.22	29.43	2.93	37.89	7.15	54.58	17.53	71.15	13.75	131.85	25.65			40.7418	325.256	69.59	15.54	4.38	3.12	1.57	3.3		1.69	0.54	1.25	0.29	3.79	2.1	0.3
10C-37.5s	Nutman et al. (2007)	G01/113	NAC-Nuuk	Itsaq GC	Igneous_plutonic	N/A	N	3511				679	2.77			534		93.76	190.67	25.67	84.69	30.54	3.8	40.04	6.74	54.53	18.11	70.22	17.16	166.77	31.32			35.673	446.27	69.59	15.54	4.38	3.12	1.57	3.3		1.69	0.54	1.25	0.29	3.79	2.1	0.3
10C-40.0s	Nutman et al. (2007)	G01/113	NAC-Nuuk	Itsaq GC	Igneous_plutonic	N/A	N	3622				1883	-1			667		81.68	151.61	19.92	77.9	20.02	2.66	34.93	6.75	56.99	19.07	98.71	23.48	233.04	42.53			31.0864	594.946	69.59	15.54	4.38	3.12	1.57	3.3		1.69	0.54	1.25	0.29	3.79	2.1	0.3
10C-5.0s	Nutman et al. (2007)	G01/113	NAC-Nuuk	Itsaq GC	Igneous_plutonic	N/A	N	3763				773	0.84			1423		77.2	205.98	24.5	110	51.7	6.09	78.68	18.8	159.93	46.75	197.69	35.29	320.34	53.58			128.825	447.767	69.59	15.54	4.38	3.12	1.57	3.3		1.69	0.54	1.25	0.29	3.79	2.1	0.3
10C-7.5s	Nutman et al. (2007)	G01/113	NAC-Nuuk	Itsaq GC	Igneous_plutonic	N/A	N	3779				388	-1			1203		48.32	143.23	15.72	62.3	21.95	3.99	57.22	13.2	127.66	42.3	175.54	35.35	309.89	51.11			106.033	424.743	69.59	15.54	4.38	3.12	1.57	3.3		1.69	0.54	1.25	0.29	3.79	2.1	0.3
10C-ig-42-50s	Nutman et al. (2007)	G01/113	NAC-Nuuk	Itsaq GC	Igneous_plutonic	N/A	N	3848				491	-1			1409		68.85	178.91	21.84	98.74	43.77	5.43	88.03	17.72	162.37	48.36	196.07	38.69	319.87	58.62			151.129	530.556	69.59	15.54	4.38	3.12	1.57	3.3		1.69	0.54	1.25	0.29	3.79	2.1	0.3
3A-0.0s	Nutman et al. (2007)	G01/113	NAC-Nuuk	Itsaq GC	Igneous_plutonic	N/A	N	3767				132	-1			826		7.32	53.17	4.5	36.02	20.54	3.75	54.81	12.1	96.32	28.55	111.7	22.85	201.16	35.5			332.363	788.597	69.59	15.54	4.38	3.12	1.57	3.3		1.69	0.54	1.25	0.29	3.79	2.1	0.3
3A-10.0s	Nutman et al. (2007)	G01/113	NAC-Nuuk	Itsaq GC	Igneous_plutonic	N/A	N	3724				495	-1			958		7.21	57.56	5.62	35.56	23.02	3.43	50.65	11.9	100.88	32.16	127.73	25.31	210.28	39.8			311.23	789.715	69.59	15.54	4.38	3.12	1.57	3.3		1.69	0.54	1.25	0.29	3.79	2.1	0.3
3A-12.5s	Nutman et al. (2007)	G01/113	NAC-Nuuk	Itsaq GC	Igneous_plutonic	N/A	N	3737				357	-1			822		10.19	71.68	8.14	43.66	25.92	2.1	57.38	11.1	102.22	29.14	126.07	24.13	210.98	40.34			301.81	743.088	69.59	15.54	4.38	3.12	1.57	3.3		1.69	0.54	1.25	0.29	3.79	2.1	0.3
3A-15.0s	Nutman et al. (2007)	G01/113	NAC-Nuuk	Itsaq GC	Igneous_plutonic	N/A	N	3645				526	-1			766		6.59	43.72	4.26	23.1	12.86	2.13	42.62	8.6	85.53	23.71	112.77	21.2	188.24	37.89			263.337	684.91	69.59	15.54	4.38	3.12	1.57	3.3		1.69	0.54	1.25	0.29	3.79	2.1	0.3
3A-17.5s	Nutman et al. (2007)	G01/113	NAC-Nuuk	Itsaq GC	Igneous_plutonic	N/A	N	3598				-1	-1			730		1.58	24.62	1.13	8.59	9.33	1.12	34.22	6.2	64.66	22.62	99.88	21.08	185.92	40.43			236.455	650.761	69.59	15.54	4.38	3.12	1.57	3.3		1.69	0.54	1.25	0.29	3.79	2.1	0.3
3A-2.5s	Nutman et al. (2007)	G01/113	NAC-Nuuk	Itsaq GC	Igneous_plutonic	N/A	N	3783				275	-1			866		6	46.47	5.18	34.22	20.99	2.9	48.7	10.4	93	28.41	108.06	21.53	187.32	34.62			316.958	764.959	69.59	15.54	4.38	3.12	1.57	3.3		1.69	0.54	1.25	0.29	3.79	2.1	0.3
3A-20.0s	Nutman et al. (2007)	G01/113	NAC-Nuuk	Itsaq GC	Igneous_plutonic	N/A	N	3531				116	-1			699		2.06	28.24	1.92	16.22	8.7	1.46	25.67	7.2	64.91	22.21	99.81	21.42	226.56	46.63			194.015	707.913	69.59	15.54	4.38	3.12	1.57	3.3		1.69	0.54	1.25	0.29	3.79	2.1	0.3
3A-22.5s	Nutman et al. (2007)	G01/113	NAC-Nuuk	Itsaq GC	Igneous_plutonic	N/A	N	3253				285	-1			665		3.45	21.12	1.68	10.77	9.08	1.4	22.2	4.8	58.69	18.96	91.07	23.34	237.74	48.42			110.362	621.239	69.59	15.54	4.38	3.12	1.57	3.3		1.69	0.54	1.25	0.29	3.79	2.1	0.3
3A-25.0s	Nutman et al. (2007)	G01/113	NAC-Nuuk	Itsaq GC	Igneous_plutonic	N/A	N	3059				135	-1			608		1.75	14.34	0.73	8.61	5.42	0.77	17.56	4	42.92	17.26	94.02	24.21	265.13	55.71			51.1668	621.966	69.59	15.54	4.38	3.12	1.57	3.3		1.69	0.54	1.25	0.29	3.79	2.1	0.3
3A-27.5s	Nutman et al. (2007)	G01/113	NAC-Nuuk	Itsaq GC	Igneous_plutonic	N/A	N	2858				-1	-1			500		1.53	9.94	1.21	6.08	4.48	0.49	16.58	3	33.04	14.38	85.17	23.49	271.35	55.54			17.2711	601.748	69.59	15.54	4.38	3.12	1.57	3.3		1.69	0.54	1.25	0.29	3.79	2.1	0.3
3A-30.0s	Nutman et al. (2007)	G01/113	NAC-Nuuk	Itsaq GC	Igneous_plutonic	N/A	N	2734				-1	-1			419		0.79	8.57	1.11	5.54	2.98	0.7	10.49	1.2	27.22	11.52	70.24	20.78	251.62	53.89			6.86632	620.216	69.59	15.54	4.38	3.12	1.57	3.3		1.69	0.54	1.25	0.29	3.79	2.1	0.3
3A-32.5s	Nutman et al. (2007)	G01/113	NAC-Nuuk	Itsaq GC	Igneous_plutonic	N/A	N	2689				-1	-1			379		1.28	7.54	0.84	4.17	2.24	0.71	8.95	1.9	22.86	10.35	67.96	18.72	240.11	54.27			4.56739	625.681	69.59	15.54	4.38	3.12	1.57	3.3		1.69	0.54	1.25	0.29	3.79	2.1	0.3
3A-35.0s	Nutman et al. (2007)	G01/113	NAC-Nuuk	Itsaq GC	Igneous_plutonic	N/A	N	2587				-1	0.89			400		3	6.96	0.51	2.75	3.16	0.45	5.77	1.5	20.39	10.77	62.61	19.59	217.15	53.78			3.40835	636.321	69.59	15.54	4.38	3.12	1.57	3.3		1.69	0.54	1.25	0.29	3.79	2.1	0.3
3A-37.5s	Nutman et al. (2007)	G01/113	NAC-Nuuk	Itsaq GC	Igneous_plutonic	N/A	N	2725				348	-1			356		1.94	6.05	0.3	7.32	4.99	0.82	8.5	1.5	22.57	10.42	63.26	19.31	240.48	56.96			3.43163	664.424	69.59	15.54	4.38	3.12	1.57	3.3		1.69	0.54	1.25	0.29	3.79	2.1	0.3
3A-40.0s	Nutman et al. (2007)	G01/113	NAC-Nuuk	Itsaq GC	Igneous_plutonic	N/A	N	2662				-1	-1			413		1.95	10.01	1.25	3.9	4	1.08	6.86	1.7	29.14	11.21	73.47	19.95	261.93	59.55			4.56131	713.361	69.59	15.54	4.38	3.12	1.57	3.3		1.69	0.54	1.25	0.29	3.79	2.1	0.3
3A-42.5s	Nutman et al. (2007)	G01/113	NAC-Nuuk	Itsaq GC	Igneous_plutonic	N/A	N	2653				-1	-1			408		1.1	11.78	0.69	4.74	9.77	0.73	4.14	1.4	20.42	8.37	51.18	18.41	211.75	50.52			2.27964	563.563	69.59	15.54	4.38	3.12	1.57	3.3		1.69	0.54	1.25	0.29	3.79	2.1	0.3
3A-5.0s	Nutman et al. (2007)	G01/113	NAC-Nuuk	Itsaq GC	Igneous_plutonic	N/A	N	3746				451	-1			686		4.97	43.41	3.43	20.64	14.71	2.62	36.98	8	81.92	25.33	99.85	19.83	169.77	30.23			270.667	625.221	69.59	15.54	4.38	3.12	1.57	3.3		1.69	0.54	1.25	0.29	3.79	2.1	0.3
3A-7.5s	Nutman et al. (2007)	G01/113	NAC-Nuuk	Itsaq GC	Igneous_plutonic	N/A	N	3698				356	-1			875		4.13	42.32	3.63	25.13	18	2.38	40.21	9.1	90.01	29.28	115.2	23.91	207.04	37.27			326.433	780.152	69.59	15.54	4.38	3.12	1.57	3.3		1.69	0.54	1.25	0.29	3.79	2.1	0.3
10A	Nutman et al. (2007)	G93/05	NAC-Nuuk	Itsaq GC	Igneous_plutonic	Core	Y	3840				432	-1			1076		0.01	13.27	0.15	3.47	4.81	1.91	29.05	8.58	98.93	35.04	166.06	36.57	344.65	66.48			66.4706	156.694	67.65	16.03	4.53	3.7	1.45	8.1		2.58	0.65	2.09	0.84	3.29	2.02	0.41
10B-s	Nutman et al. (2007)	G93/05	NAC-Nuuk	Itsaq GC	Igneous_plutonic	Core	Y	3808				288	-1			776		0.02	15.28	0.08	1.76	3.18	0.73	21.76	6.26	73.14	26.47	121.91	26.6	245.19	46.53			103.772	266.541	67.65	16.03	4.53	3.7	1.45	8.1		2.58	0.65	2.09	0.84	3.29	2.02	0.41
10C	Nutman et al. (2007)	G93/05	NAC-Nuuk	Itsaq GC	Igneous_plutonic	Core	Y	3844				388	-1			963		0.01	11.82	0.15	2.31	4.25	1.47	23.07	7.04	85.01	31.1	150.53	33.58	324.49	63.63			51.9782	156.869	67.65	16.03	4.53	3.7	1.45	8.1		2.58	0.65	2.09	0.84	3.29	2.02	0.41
29A	Nutman et al. (2007)	G93/05	NAC-Nuuk	Itsaq GC	Igneous_plutonic	Core	Y	3658				231	-1			375		0.02	5.75	0.05	1.15	2.09	0.48	11.11	3.11	35.86	12.67	58.52	12.86	121.55	23.27			25.1529	110.848	67.65	16.03	4.53	3.7	1.45	8.1		2.58	0.65	2.09	0.84	3.29	2.02	0.41
29B	Nutman et al. (2007)	G93/05	NAC-Nuuk	Itsaq GC	Igneous_plutonic	Core	Y	3800				365	-1			1033		0.03	16.59	0.13	2.97	5.29	1.12	28.62	8.85	101.81	34.92	162.2	33.52	309.74	56.41			88.0508	230.353	67.65	16.03	4.53	3.7	1.45	8.1		2.58	0.65	2.09	0.84	3.29	2.02	0.41
29C	Nutman et al. (2007)	G93/05	NAC-Nuuk	Itsaq GC	Igneous_plutonic	Core	Y	3803				246	-1			337		-1	7.66	0.04	0.69	1.22	0.32	8.51	2.4	29.05	10.45	51.37	11.62	117.8	23.47			42.2224	117.368	67.65	16.03	4.53	3.7	1.45	8.1		2.58	0.65	2.09	0.84	3.29	2.02	0.41
29D	Nutman et al. (2007)	G93/05	NAC-Nuuk	Itsaq GC	Igneous_plutonic	Core	Y	3800				158	-1			191		-1	5.31	0.01	0.36	0.66	0.18	3.98	1.2	15.18	5.68	29.67	7.17	76.63	16.1			20.505	106.8	67.65	16.03	4.53	3.7	1.45	8.1		2.58	0.65	2.09	0.84	3.29	2.02	0.41
3A	Nutman et al. (2007)	G93/05	NAC-Nuuk	Itsaq GC	Igneous_plutonic	Core	Y	3859				333	-1			653		-1	7.25	0.06	1.3	2.99	0.67	16.58	4.7	59.06	22.14	106.71	22.95	213.03	41.29			20.5647	83.0224	67.65	16.03	4.53	3.7	1.45	8.1		2.58	0.65	2.09	0.84	3.29	2.02	0.41
3B	Nutman et al. (2007)	G93/05	NAC-Nuuk	Itsaq GC	Igneous_plutonic	Core	Y	3808				290	-1			895		0.01	7.08	0.2	4.41	7.25	1.59	35.48	9.17	99.69	31.76	132.1	25.81	224.39	39.42			30.1663	75.555	67.65	16.03	4.53	3.7	1.45	8.1		2.58	0.65	2.09	0.84	3.29	2.02	0.41
3C	Nutman et al. (2007)	G93/05	NAC-Nuuk	Itsaq GC	Igneous_plutonic	Core	Y	3875				223	-1			725		-1	6.31	0.18	3.35	5.68	1.2	26.77	7.53	80.63	25.93	107.73	21.43	184.26	33.05			24.2129	62.0133	67.65	16.03	4.53	3.7	1.45	8.1		2.58	0.65	2.09	0.84	3.29	2.02	0.41
GGU110999_01b	Whitehouse & Kamber (2002a)	GGU 110999	NAC-Nuuk	Itsaq GC	Igneous_plutonic	Core	Y	3782	10							239		0.003	4.55	0.015	0.28	0.76	0.17	5.3	1.73	23.1	8.23	40.9	8.99	90.7	21.8	13110
GGU110999_03b,2	Whitehouse & Kamber (2002a)	GGU 110999	NAC-Nuuk	Itsaq GC	Igneous_plutonic	Rim	Y	3604	8							115		0.005	3.32	0.012	0.15	0.26	0.071	1.31	0.748	7.03	2.96	18.3	5	47.9	12.6	12630
GGU110999_03c	Whitehouse & Kamber (2002a)	GGU 110999	NAC-Nuuk	Itsaq GC	Igneous_plutonic	Core	Y	3760	12							340		0.005	5.33	0.038	0.63	1.4	0.41	5.05	2.1	23	9.12	4	9.11	79.3	18.9	10510
GGU110999_04a	Whitehouse & Kamber (2002a)	GGU 110999	NAC-Nuuk	Itsaq GC	Igneous_plutonic	Core	Y	3783	7							2260		0.042	15.6	0.34	5.7	12	3	65.6	20.7	228	75.7	306	58.6	442	92.5	9624
GGU110999_04b	Whitehouse & Kamber (2002a)	GGU 110999	NAC-Nuuk	Itsaq GC	Igneous_plutonic	Rim	Y	3631	9							175		0.005	8.49	0.02	0.28	0.55	0.097	2.46	0.978	17.5	5.86	29.3	8.77	76.2	20.5	13980
GGU110999_05a	Whitehouse & Kamber (2002a)	GGU 110999	NAC-Nuuk	Itsaq GC	Igneous_plutonic	Core	Y	3775	8							626		0.008	5.53	0.082	1.5	3.2	0.73	20.8	5.99	77.3	24.6	103	22.3	174	40.2	10730
GGU110999_05b	Whitehouse & Kamber (2002a)	GGU 110999	NAC-Nuuk	Itsaq GC	Igneous_plutonic	Rim	N	3660	12							195		0.004	7.91	0.02	0.32	0.6	0.1	3.29	1.27	18.7	6.58	29.6	7.65	71.5	18.1	11710		21.28	16
GGU110999_07a	Whitehouse & Kamber (2002a)	GGU 110999	NAC-Nuuk	Itsaq GC	Igneous_plutonic	Core	Y	3797	12							801		0.014	6.69	0.072	1.3	3	0.71	12.2	5.22	59.5	22.7	99.1	20.2	170	39.5	10090
GGU110999_07b	Whitehouse & Kamber (2002a)	GGU 110999	NAC-Nuuk	Itsaq GC	Igneous_plutonic	Rim	Y	3677	15							311		0.006	12.4	0.029	0.43	0.87	0.17	3.51	1.35	24.7	7.62	41.4	9.99	98	24.5	14280
GGU110999_08a	Whitehouse & Kamber (2002a)	GGU 110999	NAC-Nuuk	Itsaq GC	Igneous_plutonic	Rim	Y	3605	8							251		0.006	9.65	0.023	0.27	0.68	0.15	3.85	1.51	21.5	7.42	41.4	10.4	100	25.8	15210
GGU110999_08b	Whitehouse & Kamber (2002a)	GGU 110999	NAC-Nuuk	Itsaq GC	Igneous_plutonic	Core	Y	3759	11							469		0.002	4.81	0.027	0.61	1.7	0.4	9.83	3.39	40.1	15.5	69.2	15.4	127	29.8	9195
GGU110999_09b	Whitehouse & Kamber (2002a)	GGU 110999	NAC-Nuuk	Itsaq GC	Igneous_plutonic	Core	Y	3838	17							539		0.031	7.17	0.048	0.83	2	0.54	11.4	4.25	56	18.3	89	17.6	141	33.9	10480
GGU110999_10a	Whitehouse & Kamber (2002a)	GGU 110999	NAC-Nuuk	Itsaq GC	Igneous_plutonic	Core	Y	3711	11							620		0.055	5.56	0.049	0.64	1.7	0.49	9.8	4.11	49.8	20.1	93	21.1	192	43.4	8865
GGU110999_10b	Whitehouse & Kamber (2002a)	GGU 110999	NAC-Nuuk	Itsaq GC	Igneous_plutonic	Rim	Y	3675	14							171		0.005	7.5	0.015	0.26	0.51	0.097	3.61	0.985	13	5.63	27.9	7.08	70	16.6	11480
GGU110999_10c	Whitehouse & Kamber (2002a)	GGU 110999	NAC-Nuuk	Itsaq GC	Igneous_plutonic	Rim	N	3634	30							64.7		0.079	1.04	0.033	0.071	0.1	0.075	0.725	0.29	6.21	1.97	12.7	3.44	38.2	10.8	12240		0.13	13
GGU110999_12a	Whitehouse & Kamber (2002a)	GGU 110999	NAC-Nuuk	Itsaq GC	Igneous_plutonic	Core	Y	3795	7							899		0.057	6.19	0.088	1.3	3	0.76	18.2	6.06	85.4	31.2	147	29.5	252	57.6	9545
GGU110999_12e	Whitehouse & Kamber (2002a)	GGU 110999	NAC-Nuuk	Itsaq GC	Igneous_plutonic	Rim	N	2577	60							317		0.035	13.7	0.05	0.58	1	0.2	6	1.94	25.6	9.76	50.6	13.2	123	31.3	13140		0.08	8
GGU110999_13a	Whitehouse & Kamber (2002a)	GGU 110999	NAC-Nuuk	Itsaq GC	Igneous_plutonic	Core	Y	3556	9							455		0.007	6.3	0.033	0.67	1.8	0.36	14.4	4.37	51.9	16.8	79.3	17	142	31.8	11100
GGU110999_13b	Whitehouse & Kamber (2002a)	GGU 110999	NAC-Nuuk	Itsaq GC	Igneous_plutonic	Rim	Y	3669	12							397		0.008	12.7	0.036	0.54	1.1	0.19	4.33	1.85	29	9.57	48.9	12.3	116	29.4	13210
GGU110999_13c	Whitehouse & Kamber (2002a)	GGU 110999	NAC-Nuuk	Itsaq GC	Igneous_plutonic	Rim	N	2631	46							78.5		0.013	0.955	0.008	0.028	0.12	0.1	0.375	0.312	3.97	1.72	10.3	2.75	29.1	8.71	12160		0.06	6
GGU110999_16a,2	Whitehouse & Kamber (2002a)	GGU 110999	NAC-Nuuk	Itsaq GC	Igneous_plutonic	Rim	Y	3596	11							218		0.006	9.49	0.026	0.32	0.72	0.12	3.39	1.3	17.5	6.93	36.4	9.57	91.2	22	12560
GGU110999_16b	Whitehouse & Kamber (2002a)	GGU 110999	NAC-Nuuk	Itsaq GC	Igneous_plutonic	Core	Y	3754	13							450		0.014	8.42	0.055	0.65	1.6	0.45	5.46	2.85	34.7	14.4	62.5	14	114	27.4	9050
GGU110999_16c	Whitehouse & Kamber (2002a)	GGU 110999	NAC-Nuuk	Itsaq GC	Igneous_plutonic	Rim	N	2582	44							53.1		0.001	0.74	0.005	0.021	0.08	0.056	0.428	0.231	3.49	1.53	8.7	1.97	20.5	6.25	10970		0.09	9
SM/GR/97/2_02d	Whitehouse & Kamber (2002a)	SM/GR/97/2	NAC-Nuuk	Itsaq GC	Igneous_plutonic	Core	N	3725	13							441		0.023	5.57	0.047	0.71	1.5	0.46	9.85	2.69	33.5	14.2	66.2	15	134	33.4	9705		33.06	57
SM/GR/97/2_03a	Whitehouse & Kamber (2002a)	SM/GR/97/2	NAC-Nuuk	Itsaq GC	Igneous_plutonic	Core	Y	3790	7							330		0.027	11.3	0.082	1.1	2.1	0.72	4.14	2.21	32.7	9.96	47.2	9.98	99.7	24.3	9974
SM/GR/97/2_03b	Whitehouse & Kamber (2002a)	SM/GR/97/2	NAC-Nuuk	Itsaq GC	Igneous_plutonic	Rim	Y	3643	17							268		0.01	6.89	0.031	0.33	0.61	0.11	2.69	1.44	19.9	7.87	38.5	9.66	91.6	23.8	13520
SM/GR/97/2_05b	Whitehouse & Kamber (2002a)	SM/GR/97/2	NAC-Nuuk	Itsaq GC	Igneous_plutonic	Core	N									1380		1.9	34.6	2.3	17.7	9.5	4.4	30.9	10.8	128	47.5	222	50	474	100	11890
SM/GR/97/2_06a	Whitehouse & Kamber (2002a)	SM/GR/97/2	NAC-Nuuk	Itsaq GC	Igneous_plutonic	Core	Y	3804	10							536		0.036	4.32	0.11	1.5	2.6	0.69	6.63	3.6	45.1	16.6	69	17.3	155	35.8	9472
SM/GR/97/2_06a2	Whitehouse & Kamber (2002a)	SM/GR/97/2	NAC-Nuuk	Itsaq GC	Igneous_plutonic	Core	Y	3804	10							552			8.27	0.063	1.3	2.6	0.53	6.44	3.65	45.4	17.2	78.4	18.3	156	39.2	10590
SM/GR/97/2_06b	Whitehouse & Kamber (2002a)	SM/GR/97/2	NAC-Nuuk	Itsaq GC	Igneous_plutonic	Rim	Y	3652	3							170		0.097	1.77	0.061	0.24	0.36	0.27	1.23	0.666	9.3	4.3	20.8	5.77	52.6	14.3	11550
SM/GR/97/2_06b3	Whitehouse & Kamber (2002a)	SM/GR/97/2	NAC-Nuuk	Itsaq GC	Igneous_plutonic	Rim	Y	3652	3							139		0.12	1.46	0.03	0.1	0.22	0.18	1.27	0.676	9.75	3.79	19.3	5.07	43.3	10.1	10800
SM/GR/97/2_08c	Whitehouse & Kamber (2002a)	SM/GR/97/2	NAC-Nuuk	Itsaq GC	Igneous_plutonic	Core	Y	3808	10							520		0.026	4.67	0.085	1.1	1.9	0.63	9.9	3.65	49	17.2	81.3	17.1	165	37.3	9862
SM/GR/97/2_09b	Whitehouse & Kamber (2002a)	SM/GR/97/2	NAC-Nuuk	Itsaq GC	Igneous_plutonic	Core	Y	3838	14							913		0.05	8.02	0.27	3.4	5.8	1.7	19.2	6.8	64.7	25.6	108	23.3	220	48.7	9763
SM/GR/97/2_10b	Whitehouse & Kamber (2002a)	SM/GR/97/2	NAC-Nuuk	Itsaq GC	Igneous_plutonic	Core	Y	3785	15							546		0.014	7.08	0.057	0.77	1.8	0.61	10.5	3.73	49.2	19	86.6	20	190	45.2	10920
SM/GR/97/2_11a2	Whitehouse & Kamber (2002a)	SM/GR/97/2	NAC-Nuuk	Itsaq GC	Igneous_plutonic	Core	Y	3817	10							236		0.32	7.3	0.28	2.3	1.7	0.52	6.29	1.84	23.6	8.7	37.5	8.23	72.1	16.7	8373
SM/GR/97/2_11a3	Whitehouse & Kamber (2002a)	SM/GR/97/2	NAC-Nuuk	Itsaq GC	Igneous_plutonic	Core	Y	3817	10							311		0.1	7.58	0.1	0.87	1.8	0.48	7.31	2.3	30.7	10.6	48	11	101	23.2	9100
SM/GR/97/2_11b	Whitehouse & Kamber (2002a)	SM/GR/97/2	NAC-Nuuk	Itsaq GC	Igneous_plutonic	Rim	Y	3598	21							487		0.018	9.87	0.05	0.6	1.4	0.14	6.12	3.07	51.3	15.1	72.2	15.8	137	29.9	13730
SM/GR/97/2_12b	Whitehouse & Kamber (2002a)	SM/GR/97/2	NAC-Nuuk	Itsaq GC	Igneous_plutonic	Core	Y	3825	8							368		0.02	7.01	0.044	0.58	1.3	0.4	4.97	2.05	22.2	9.56	42.5	9.92	95.5	22.5	10640
SM/GR/97/2_13a	Whitehouse & Kamber (2002a)	SM/GR/97/2	NAC-Nuuk	Itsaq GC	Igneous_plutonic	Rim	N	3599	5							92.6		0.6	3.81	0.33	1.8	0.56	0.25	2.66	0.568	7.53	3.32	19.3	5.43	65.6	20.5	17350		9.08	227
SM/GR/97/2_13b	Whitehouse & Kamber (2002a)	SM/GR/97/2	NAC-Nuuk	Itsaq GC	Igneous_plutonic	Core	Y	3826	10							760		0.1	9.83	0.12	1.1	2.2	0.64	16.5	5.7	77	30.5	139	30.2	273	65.1	11790
SM/GR/97/2_13b3	Whitehouse & Kamber (2002a)	SM/GR/97/2	NAC-Nuuk	Itsaq GC	Igneous_plutonic	Core	Y	3826	10							409		0.13	8.03	0.051	0.58	1.2	0.36	9.01	3.07	41.8	14.3	70.1	17.1	148	35.2	12180
SM/GR/97/2_14a	Whitehouse & Kamber (2002a)	SM/GR/97/2	NAC-Nuuk	Itsaq GC	Igneous_plutonic	Core	Y	3787	6							466		0.023	6.54	0.065	0.89	1.8	0.54	9.5	3.06	37.2	14.6	67.8	16	150	36.5	11930
SM/GR/97/2_14b	Whitehouse & Kamber (2002a)	SM/GR/97/2	NAC-Nuuk	Itsaq GC	Igneous_plutonic	Rim	Y	3632	14							425		0.021	12.3	0.055	0.6	1.5	0.12	9.55	3.55	46.3	14.9	65.5	16.5	130	27.3	13180
SM/GR/97/2_15a	Whitehouse & Kamber (2002a)	SM/GR/97/2	NAC-Nuuk	Itsaq GC	Igneous_plutonic	Core	Y	3804	8							772		0.054	7.45	0.24	3.4	5.5	1.7	22.1	6.56	71	24.4	103	22.1	186	40.9	8153
SM/GR/97/2_15b	Whitehouse & Kamber (2002a)	SM/GR/97/2	NAC-Nuuk	Itsaq GC	Igneous_plutonic	Rim	Y	3615	3							218		0.1	5.83	0.04	0.34	0.44	0.12	3.95	1.28	19.8	7.04	36.1	9.62	93.4	22.5	11640
SM/GR/97/2_15c	Whitehouse & Kamber (2002a)	SM/GR/97/2	NAC-Nuuk	Itsaq GC	Igneous_plutonic	Rim	N	3619	12							212		0.041	9.08	0.088	0.74	1	0.2	4.2	1.56	21.4	7.07	34.8	8.3	75.8	17.6	14420		22.44	51
SM/GR/97/2_16a	Whitehouse & Kamber (2002a)	SM/GR/97/2	NAC-Nuuk	Itsaq GC	Igneous_plutonic	Core	Y	3817	10							424		0.02	5.09	0.05	0.57	1.5	0.51	9.87	3.26	41.1	14.3	68.6	15.6	144	33.2	10590
SM/GR/97/2_16b	Whitehouse & Kamber (2002a)	SM/GR/97/2	NAC-Nuuk	Itsaq GC	Igneous_plutonic	Rim	Y	3645	4							180		0.017	6.78	0.035	0.23	0.52	0.14	2.59	0.959	12.1	5.04	24.7	6.08	61.8	16.3	11600
SM/GR/97/2_17a	Whitehouse & Kamber (2002a)	SM/GR/97/2	NAC-Nuuk	Itsaq GC	Igneous_plutonic	Rim	Y	3589	12							355		0.021	12.2	0.049	0.57	1.4	0.18	7.67	2.94	37.8	13.4	60.4	14.6	115	29.1	15600
GGU125540_01a	Whitehouse & Kamber (2002b)	GGU 125540	NAC-Nuuk	Itsaq GC	Igneous_plutonic		Y	3642	16							374		0.09	11.1	0.06	0.6	1.39	0.11	8.87	3.23	37.7	14.2	61	11.7	97	22.1	12200									4.21	13.1	1.8	0.8	1.47	0.35	1.35
GGU125540_08a	Whitehouse & Kamber (2002b)	GGU 125540	NAC-Nuuk	Itsaq GC	Igneous_plutonic		Y	3629	5							797			22.8	0.12	1.59	2.5	0.23	10	4.88	58.6	22.6	92	18.4	149	32.1	13200									4.21	13.1	1.8	0.8	1.47	0.35	1.35
GGU125540_08a(2)	Whitehouse & Kamber (2002b)	GGU 125540	NAC-Nuuk	Itsaq GC	Igneous_plutonic		Y	3629	5							796		0.11	24.5	0.15	1.99	4.17	0.27	22.7	7.1	85.5	27.8	112	20.9	170	33.8	10800									4.21	13.1	1.8	0.8	1.47	0.35	1.35
GGU125540_10a	Whitehouse & Kamber (2002b)	GGU 125540	NAC-Nuuk	Itsaq GC	Igneous_plutonic		Y	3633	7							933			17.3	0.11	2.07	3.71	0.18	17.8	6.85	74.6	27.5	107	20.9	175	35.9	11100									4.21	13.1	1.8	0.8	1.47	0.35	1.35
GGU125540_10a(2)	Whitehouse & Kamber (2002b)	GGU 125540	NAC-Nuuk	Itsaq GC	Igneous_plutonic		Y	3633	7							713		0.14	15.6	0.11	1.61	3.62	0.29	16.7	5.74	67.5	24.4	99	19.8	152	31.3	9770									4.21	13.1	1.8	0.8	1.47	0.35	1.35
GGU125540_14c	Whitehouse & Kamber (2002b)	GGU 125540	NAC-Nuuk	Itsaq GC	Igneous_plutonic		Y	3649	8							755		0.15	14.6	0.11	1.56	3.32	0.24	20.8	6.48	83.4	26.8	116	23.3	174	37.6	10800									4.21	13.1	1.8	0.8	1.47	0.35	1.35
GGU125540_15a	Whitehouse & Kamber (2002b)	GGU 125540	NAC-Nuuk	Itsaq GC	Igneous_plutonic		Y	3586	5							850		0.12	16	0.2	3	5.54	0.37	25	8.58	106	30.8	127	24.5	192	40.5	9310									4.21	13.1	1.8	0.8	1.47	0.35	1.35
GGU125540_15c	Whitehouse & Kamber (2002b)	GGU 125540	NAC-Nuuk	Itsaq GC	Igneous_plutonic		N	3530	14							583		0.2	16	0.1	1.06	2.55	0.18	16.8	5.22	62.6	20.6	94	17	142	29.5	10700		8.64	16						4.21	13.1	1.8	0.8	1.47	0.35	1.35
LA12-08_15-2	Vezinet et al. (2018)	LA12-08	NAC-Saglek	Uivak gneiss	Igneous_plutonic	N/A	N	3857.5	20			75.2		4.9	97	497	0.29	1.11	11.23	1.06	9	6.12	0.466	14	3.36	38.1	15.2	80.1	18.51	189.8	44.1	11270		46	129.8	70	14.985	3.078	4.862	1.399	2.863	27.52	2.715	0.67	1.698	0.218	3.798	4.789	0.156
LA12-08_16-2	Vezinet et al. (2018)	LA12-08	NAC-Saglek	Uivak gneiss	Igneous_plutonic	N/A	N	3884.2	20			64.9	800	26.2	790	910	< L.O.D.	7.89	29.6	4.91	29.8	16	1.158	27.6	5.74	62.8	25.64	138.9	33.33	362	81.4	12760		65.3	434	70	14.985	3.078	4.862	1.399	2.863	27.52	2.715	0.67	1.698	0.218	3.798	4.789	0.156
LA12-08_2-2	Vezinet et al. (2018)	LA12-08	NAC-Saglek	Uivak gneiss	Igneous_plutonic	N/A	N	3768	23			410	4900	30	1700	1031	0.035	16.6	56	7.8	44	16.9	1.06	30	7.34	79.2	29.76	145.8	31.3	304	65.1	8720		54	122.7	70	14.985	3.078	4.862	1.399	2.863	27.52	2.715	0.67	1.698	0.218	3.798	4.789	0.156
LA12-08_25-1	Vezinet et al. (2018)	LA12-08	NAC-Saglek	Uivak gneiss	Igneous_plutonic	N/A	N	3616	32			60.4	< L.O.D.	3.2	21.8	523	0.78	2.13	14.1	2.49	21.8	15	0.74	24.4	4.27	40	14.62	76.3	17.8	181.4	37.44	10310		5.8	238.3	70	14.985	3.078	4.862	1.399	2.863	27.52	2.715	0.67	1.698	0.218	3.798	4.789	0.156
LA12-08_27-2	Vezinet et al. (2018)	LA12-08	NAC-Saglek	Uivak gneiss	Igneous_plutonic	N/A	N	3590.3	21			72.4	< L.O.D.	3.81	67	572	0.57	2.06	13.1	1.7	12.6	7.5	0.42	12.1	2.68	34.2	15.77	90	22.39	236	51.2	11150		6.4	401	70	14.985	3.078	4.862	1.399	2.863	27.52	2.715	0.67	1.698	0.218	3.798	4.789	0.156
LA12-08_30-1	Vezinet et al. (2018)	LA12-08	NAC-Saglek	Uivak gneiss	Igneous_plutonic	N/A	N	3862.7	22			94.4	< L.O.D.	6.7	158	1560	< L.O.D.	1.38	17.4	1.58	13.2	12.22	1.18	37.7	10.8	126	48	233	48.9	466	95.7	9220		106.3	230	70	14.985	3.078	4.862	1.399	2.863	27.52	2.715	0.67	1.698	0.218	3.798	4.789	0.156
LA12-08_31-1	Vezinet et al. (2018)	LA12-08	NAC-Saglek	Uivak gneiss	Igneous_plutonic	N/A	N	3675	32			79.2	153	5.17	150	645	0.69	7.8	41.1	5.6	40.1	22.5	1.22	34.3	5.89	51.5	18.43	93.6	21.76	229.7	52.3	11150		39.4	244	70	14.985	3.078	4.862	1.399	2.863	27.52	2.715	0.67	1.698	0.218	3.798	4.789	0.156
LA12-08_31-2	Vezinet et al. (2018)	LA12-08	NAC-Saglek	Uivak gneiss	Igneous_plutonic	N/A	Y	3668	25			90.4		7.2	66	1082		0.435	14.07	0.52	4.48	4.55	0.466	17.1	5.79	74.7	30.7	157.2	34.7	344	73.3	10860		141.9	219.6	70	14.985	3.078	4.862	1.399	2.863	27.52	2.715	0.67	1.698	0.218	3.798	4.789	0.156
LA12-08_32-2	Vezinet et al. (2018)	LA12-08	NAC-Saglek	Uivak gneiss	Igneous_plutonic	N/A	N	3692	25			113.4	302	12.8	86.7	894	< L.O.D.	26.1	90.4	11.5	54.4	16.6	2.67	37.7	9.31	89.4	26.8	98.9	16.31	126.2	21	7610		66.1	147	70	14.985	3.078	4.862	1.399	2.863	27.52	2.715	0.67	1.698	0.218	3.798	4.789	0.156
LA12-08_33-2	Vezinet et al. (2018)	LA12-08	NAC-Saglek	Uivak gneiss	Igneous_plutonic	N/A	N	3865	19			97.8		3.13	23.6	780		1.19	13.91	1.34	11.34	9.1	0.612	21	5.14	57.6	22.6	115.7	25.9	257	55	9750		60.6	121.4	70	14.985	3.078	4.862	1.399	2.863	27.52	2.715	0.67	1.698	0.218	3.798	4.789	0.156
LA12-08_35-2	Vezinet et al. (2018)	LA12-08	NAC-Saglek	Uivak gneiss	Igneous_plutonic	N/A	N	2821.7	22			60.8		2.68	116	465	0.92	1	8	0.97	6	4.5	0.364	10.1	2.86	34	13.81	72.3	16.22	160.7	33.7	10940		40.1	498	70	14.985	3.078	4.862	1.399	2.863	27.52	2.715	0.67	1.698	0.218	3.798	4.789	0.156
LA12-08_42-1	Vezinet et al. (2018)	LA12-08	NAC-Saglek	Uivak gneiss	Igneous_plutonic	N/A	N	3813.6	22			620	5100	8.39	154	1839	0.009	21.9	85	11.2	60	24.8	1.46	50.4	13.03	147.2	56.4	269	56.7	536	109.9	9270		152	242	70	14.985	3.078	4.862	1.399	2.863	27.52	2.715	0.67	1.698	0.218	3.798	4.789	0.156
LA12-08_42-2	Vezinet et al. (2018)	LA12-08	NAC-Saglek	Uivak gneiss	Igneous_plutonic	N/A	Y	3835.2	23			86.4		6.5	111	954	0.24	0.32	9.88	0.265	2.21	2.7	0.358	12.81	4.7	64.4	27.7	147	34.4	351	77.7	9700		54.9	180.3	70	14.985	3.078	4.862	1.399	2.863	27.52	2.715	0.67	1.698	0.218	3.798	4.789	0.156
LA12-08_46-2	Vezinet et al. (2018)	LA12-08	NAC-Saglek	Uivak gneiss	Igneous_plutonic	N/A	N	3820	27			262	1500	4.68	41.7	1369	< L.O.D.	5.1	28.9	2.92	18.4	10.7	0.588	28.4	8.59	104.4	41.9	202.1	43.5	409	83.6	10790		162.5	291	70	14.985	3.078	4.862	1.399	2.863	27.52	2.715	0.67	1.698	0.218	3.798	4.789	0.156
LA12-08_48-1	Vezinet et al. (2018)	LA12-08	NAC-Saglek	Uivak gneiss	Igneous_plutonic	N/A	N	3806.3	22			102.4	123	9.22	184	2340	0.77	4.43	46.3	5.2	38	28.1	4.05	81.3	22.5	227	69.8	271	47.9	388	66.2	11420		125	438	70	14.985	3.078	4.862	1.399	2.863	27.52	2.715	0.67	1.698	0.218	3.798	4.789	0.156
LA12-08_50-1	Vezinet et al. (2018)	LA12-08	NAC-Saglek	Uivak gneiss	Igneous_plutonic	N/A	N	3871.4	22			79.9	480	53	1172	891	0.64	10.3	34.3	3.77	23.6	13.3	0.825	25.6	5.79	63.3	25.6	136.6	32.2	342	77.6	11120		63.1	254.6	70	14.985	3.078	4.862	1.399	2.863	27.52	2.715	0.67	1.698	0.218	3.798	4.789	0.156
LA12-08_5-1	Vezinet et al. (2018)	LA12-08	NAC-Saglek	Uivak gneiss	Igneous_plutonic	N/A	N	3698	26			98.1	< L.O.D.	8.8	920	1490	0.029	3.6	23.6	3.4	27	18.6	2.5	46	12.3	135	42.7	172	31.8	269	47.6	10940		100	288	70	14.985	3.078	4.862	1.399	2.863	27.52	2.715	0.67	1.698	0.218	3.798	4.789	0.156
LA12-08_54-1	Vezinet et al. (2018)	LA12-08	NAC-Saglek	Uivak gneiss	Igneous_plutonic	N/A	N	3836	24			106.7	532	10.92	834	1110	0.7	184	299	25.6	82.7	14.78	2.26	26.9	7.4	87	34.4	168	36.8	358	74.6	9840		71	234	70	14.985	3.078	4.862	1.399	2.863	27.52	2.715	0.67	1.698	0.218	3.798	4.789	0.156
LA12-08_56-2	Vezinet et al. (2018)	LA12-08	NAC-Saglek	Uivak gneiss	Igneous_plutonic	N/A	Y	3556	51			87.3		3.48	13.9	685		0.196	7.03	0.31	2.21	2.79	0.336	11.39	3.87	48.3	19.33	99.8	22	215.4	46.7	9980		33.1	80	70	14.985	3.078	4.862	1.399	2.863	27.52	2.715	0.67	1.698	0.218	3.798	4.789	0.156
LA12-08_57-3	Vezinet et al. (2018)	LA12-08	NAC-Saglek	Uivak gneiss	Igneous_plutonic	N/A	N	3694	25			72.5		2.6	12.1	577		0.394	8.2	0.581	5.2	4.83	0.379	12.5	3.35	39.4	16.01	84.8	19.9	209	47.6	9740		27.3	66.7	70	14.985	3.078	4.862	1.399	2.863	27.52	2.715	0.67	1.698	0.218	3.798	4.789	0.156
LA12-08_57-4	Vezinet et al. (2018)	LA12-08	NAC-Saglek	Uivak gneiss	Igneous_plutonic	N/A	N	3809	28			83.1	< L.O.D.	3.99	27.9	670	< L.O.D.	7.41	17.6	3.12	23.9	17.3	1.27	32.5	6.16	57.3	20.3	95.6	20.59	202.9	43.14	10050		29.5	268	70	14.985	3.078	4.862	1.399	2.863	27.52	2.715	0.67	1.698	0.218	3.798	4.789	0.156
LA12-08_61-1	Vezinet et al. (2018)	LA12-08	NAC-Saglek	Uivak gneiss	Igneous_plutonic	N/A	N	3843.7	21			89.7	< L.O.D.	6.03	95.6	853	0.48	10.16	33.6	5.64	35.5	20.1	1.106	33.9	6.73	66	24.9	126	28.6	295	65.4	11740		55.8	304	70	14.985	3.078	4.862	1.399	2.863	27.52	2.715	0.67	1.698	0.218	3.798	4.789	0.156
LA12-08_8-2	Vezinet et al. (2018)	LA12-08	NAC-Saglek	Uivak gneiss	Igneous_plutonic	N/A	Y	3781	26			84.2		15.8	163	801		0.066	7.23	0.054	0.835	1.85	0.369	12.05	4.54	57.8	23.56	119.3	26.17	258.2	54.6	9160		56	111.8	70	14.985	3.078	4.862	1.399	2.863	27.52	2.715	0.67	1.698	0.218	3.798	4.789	0.156
X11-113-1_z1	Zong et al. (2013)	X11-113-2	Tarim	Dunhuang	Igneous_plutonic	N/A	N	2366	68					7.87		605	1.73	1.51	11.4	0.67	3.2	2.52	0.45	12.8	4.84	57	20.6	85	17.7	155	27.5	10780	0.75	122	247	68.29	16.9	3.28	4.84	1.8	9.64	22.5	1.74	0.81	1.31	0.81	2.07	3.75	0.49
X11-113-1_z14	Zong et al. (2013)	X11-113-2	Tarim	Dunhuang	Igneous_plutonic	N/A	N	2311	70					5.36		249	0.67		3.95	0.008	0.14	0.69	0.074	4.66	1.7	18.7	7.05	31.9	7.02	70.1	13.5	11018	0.39	33.1	112	68.29	16.9	3.28	4.84	1.8	9.64	22.5	1.74	0.81	1.31	0.81	2.07	3.75	0.49
X11-113-1_z15	Zong et al. (2013)	X11-113-2	Tarim	Dunhuang	Igneous_plutonic	N/A	N	2581	60					5.23		642	0.73		6.88	0.093	2.57	4.55	1.05	23.6	7.28	77.1	25.5	101	21.5	202	31.1	11185	0.55	74.8	164	68.29	16.9	3.28	4.84	1.8	9.64	22.5	1.74	0.81	1.31	0.81	2.07	3.75	0.49
X11-113-1_z17	Zong et al. (2013)	X11-113-2	Tarim	Dunhuang	Igneous_plutonic	N/A	Y	2685	48					11.7		1058	1.88		17.1	0.07	1.99	5.41	1.99	34.1	11.1	124	40.9	166	34.6	316	49.3	11993	0.95	247	472	68.29	16.9	3.28	4.84	1.8	9.64	22.5	1.74	0.81	1.31	0.81	2.07	3.75	0.49
X11-113-1_z2	Zong et al. (2013)	X11-113-2	Tarim	Dunhuang	Igneous_plutonic	N/A	Y	2622	56					16.7		1232	2.5	0.004	11.9	0.02	0.92	2.6	0.77	23.3	8.72	109	41.5	177	35.8	326	55.1	11003	1.07	225	515	68.29	16.9	3.28	4.84	1.8	9.64	22.5	1.74	0.81	1.31	0.81	2.07	3.75	0.49
X11-113-1_z21	Zong et al. (2013)	X11-113-2	Tarim	Dunhuang	Igneous_plutonic	N/A	Y	2562	70					3.76		338	0.37		3.75	0.027	0.71	1.92	0.43	9.32	3.34	34	12	52.3	11.4	113	19.1	9437	0.27	23.3	62.5	68.29	16.9	3.28	4.84	1.8	9.64	22.5	1.74	0.81	1.31	0.81	2.07	3.75	0.49
X11-113-1_z23	Zong et al. (2013)	X11-113-2	Tarim	Dunhuang	Igneous_plutonic	N/A	Y	2661	60					7.42		406	0.47		6.02	0.02	0.63	1.7	0.26	12.3	4.06	45.1	15.4	60.9	13.3	121	18.5	10377	0.43	35.1	64.6	68.29	16.9	3.28	4.84	1.8	9.64	22.5	1.74	0.81	1.31	0.81	2.07	3.75	0.49
X11-113-1_z27	Zong et al. (2013)	X11-113-2	Tarim	Dunhuang	Igneous_plutonic	N/A	Y	2603	56					5.45		543	0.6	0.002	3.88	0.06	0.87	2.36	1.08	14.5	4.81	53	19	79.4	17.7	171	27.4	9421	0.29	49.6	129	68.29	16.9	3.28	4.84	1.8	9.64	22.5	1.74	0.81	1.31	0.81	2.07	3.75	0.49
X11-113-1_z29	Zong et al. (2013)	X11-113-2	Tarim	Dunhuang	Igneous_plutonic	N/A	N	2543	66					6.51		454	0.55	0.011	4.01	0.082	1.39	2.43	0.88	14.7	4.23	46.7	15.7	65	13.9	132	22	8514	0.31	46.5	106	68.29	16.9	3.28	4.84	1.8	9.64	22.5	1.74	0.81	1.31	0.81	2.07	3.75	0.49
X11-113-1_z3	Zong et al. (2013)	X11-113-2	Tarim	Dunhuang	Igneous_plutonic	N/A	Y	2570	64					5.47		363	0.3	0.017	3.29	0.022	0.45	0.96	0.46	8.67	2.9	32	11.6	49.7	11.1	104	18.5	9380	0.19	24.7	74.9	68.29	16.9	3.28	4.84	1.8	9.64	22.5	1.74	0.81	1.31	0.81	2.07	3.75	0.49
X11-113-1_z30	Zong et al. (2013)	X11-113-2	Tarim	Dunhuang	Igneous_plutonic	N/A	Y	2680	52					12.2		490	0.61	0.007	5.74	0.052	1.04	2.23	0.68	14.2	4.41	51.1	16.8	69.5	14.9	145	23.2	8735	0.29	61.5	117	68.29	16.9	3.28	4.84	1.8	9.64	22.5	1.74	0.81	1.31	0.81	2.07	3.75	0.49
X11-113-1_z31	Zong et al. (2013)	X11-113-2	Tarim	Dunhuang	Igneous_plutonic	N/A	N	2562	52					4.22		206	0.35	0.017	2.38	0.02	0.36	0.88	0.32	5.12	1.7	19.9	6.82	29.7	7.22	71.9	12.2	12902	0.36	25.1	139	68.29	16.9	3.28	4.84	1.8	9.64	22.5	1.74	0.81	1.31	0.81	2.07	3.75	0.49
X11-113-1_z35	Zong et al. (2013)	X11-113-2	Tarim	Dunhuang	Igneous_plutonic	N/A	Y	2674	54					8.29		711	0.8	0.243	9.73	0.18	2.65	3.82	1.1	21	6.61	71.8	24.4	98.4	21.4	203	31.2	10365	0.5	84	225	68.29	16.9	3.28	4.84	1.8	9.64	22.5	1.74	0.81	1.31	0.81	2.07	3.75	0.49
X11-113-1_z37	Zong et al. (2013)	X11-113-2	Tarim	Dunhuang	Igneous_plutonic	N/A	Y	2598	58					5.34		350	0.36	0.008	3.49	0.032	1.06	1.31	0.59	9.58	3.09	33.9	12.5	50	11.1	111	18.1	8771	0.24	28.2	80.1	68.29	16.9	3.28	4.84	1.8	9.64	22.5	1.74	0.81	1.31	0.81	2.07	3.75	0.49
X11-113-1_z40	Zong et al. (2013)	X11-113-2	Tarim	Dunhuang	Igneous_plutonic	N/A	N	2509	52					7.34		396	0.5	0.012	4.26	0.015	0.44	1.29	0.45	8.94	3.36	39.3	13.7	57.8	13.3	133	21.5	9849	0.3	32.1	117	68.29	16.9	3.28	4.84	1.8	9.64	22.5	1.74	0.81	1.31	0.81	2.07	3.75	0.49
X11-113-1_z46	Zong et al. (2013)	X11-113-2	Tarim	Dunhuang	Igneous_plutonic	N/A	N	2607	48					7.69		662	1.3	0.007	7.79	0.033	0.78	2.54	0.67	16.4	5.64	64.9	23	92.2	19.8	189	29.3	8382	0.67	70.5	148	68.29	16.9	3.28	4.84	1.8	9.64	22.5	1.74	0.81	1.31	0.81	2.07	3.75	0.49
X11-113-1_z5	Zong et al. (2013)	X11-113-2	Tarim	Dunhuang	Igneous_plutonic	N/A	Y	2663	62					9.08		481	0.71	0.026	5.64	0.079	1.19	2.56	0.58	12.8	4.2	44.7	15.6	63.9	12.8	117	20.3	9457	0.42	41.3	91.5	68.29	16.9	3.28	4.84	1.8	9.64	22.5	1.74	0.81	1.31	0.81	2.07	3.75	0.49
X11-113-1_z7	Zong et al. (2013)	X11-113-2	Tarim	Dunhuang	Igneous_plutonic	N/A	Y	2639	74					5.25		378	0.34		3.34	0.026	0.66	1.38	0.6	8.63	2.95	32.4	11.5	50.2	11	105	19.1	8244	0.15	23.6	67.2	68.29	16.9	3.28	4.84	1.8	9.64	22.5	1.74	0.81	1.31	0.81	2.07	3.75	0.49
X11-113-1_z9	Zong et al. (2013)	X11-113-2	Tarim	Dunhuang	Igneous_plutonic	N/A	Y	2672	66					5.39		485	0.36	0.004	6	0.085	1.62	3.06	0.71	14.7	4.34	45.7	15.4	62.4	12.8	115	20.1	8037	0.21	43	60.1	68.29	16.9	3.28	4.84	1.8	9.64	22.5	1.74	0.81	1.31	0.81	2.07	3.75	0.49
X11-114-1_z10	Zong et al. (2013)	X11-114-1	Tarim	Dunhuang	Igneous_plutonic	N/A	Y	2348	102					6.82		961	0.58	0.009	4.47	0.034	1.12	2.68	0.42	18.7	6.65	83.3	31.7	138	30.9	303	49	9750	0.32	52.8	81.5	69.86	15.32	3.01	4.43	1.21	7.73	29.9	2.65	0.96	1.92	0.59	2.74	10.3	0.33
X11-114-1_z12	Zong et al. (2013)	X11-114-1	Tarim	Dunhuang	Igneous_plutonic	N/A	Y	2496	72					5.01		1077	1.11	0.027	7.93	0.061	0.75	1.98	0.61	17.1	6.64	84.8	35.1	162	38.2	384	67.6	8286	0.37	97.3	190	69.86	15.32	3.01	4.43	1.21	7.73	29.9	2.65	0.96	1.92	0.59	2.74	10.3	0.33
X11-114-1_z13	Zong et al. (2013)	X11-114-1	Tarim	Dunhuang	Igneous_plutonic	N/A	Y	2594	86					8.53		519	0.3		3.38	0.013	0.51	1.3	0.42	6.75	3.02	41.9	16.5	80.8	19.9	198	35.2	8191	0.14	30.8	77.8	69.86	15.32	3.01	4.43	1.21	7.73	29.9	2.65	0.96	1.92	0.59	2.74	10.3	0.33
X11-114-1_z14	Zong et al. (2013)	X11-114-1	Tarim	Dunhuang	Igneous_plutonic	N/A	Y	2518	86					13.3		1308	2.04	0.027	12.1		0.12	2.49	0.63	17.2	6.96	93	41	200	49.2	513	87.1	9682	0.88	96.4	296	69.86	15.32	3.01	4.43	1.21	7.73	29.9	2.65	0.96	1.92	0.59	2.74	10.3	0.33
X11-114-1_z2	Zong et al. (2013)	X11-114-1	Tarim	Dunhuang	Igneous_plutonic	N/A	Y	2285	88					3.51		485	0.36	0.004	2.93	0.034	0.22	1.04	0.39	7.83	2.95	40.6	16	76.4	19.2	202	36.6	9262	0.25	35	108	69.86	15.32	3.01	4.43	1.21	7.73	29.9	2.65	0.96	1.92	0.59	2.74	10.3	0.33
X11-114-1_z20	Zong et al. (2013)	X11-114-1	Tarim	Dunhuang	Igneous_plutonic	N/A	Y	2553	74					6.46		1569	1.12		12.8	0.17	4.59	8.73	2.72	43.3	13.7	153	56.4	235	53.1	524	81.3	8833	0.41	204	271	69.86	15.32	3.01	4.43	1.21	7.73	29.9	2.65	0.96	1.92	0.59	2.74	10.3	0.33
X11-114-1_z23	Zong et al. (2013)	X11-114-1	Tarim	Dunhuang	Igneous_plutonic	N/A	Y	2443	108					7.82		690	0.64	0.039	5.03		0.38	1.24	0.38	10.3	4.5	59.9	24.3	110	28.2	301	49.3	10113	0.36	60.4	205	69.86	15.32	3.01	4.43	1.21	7.73	29.9	2.65	0.96	1.92	0.59	2.74	10.3	0.33
X11-114-1_z24	Zong et al. (2013)	X11-114-1	Tarim	Dunhuang	Igneous_plutonic	N/A	Y	2452	82					12.7		959	1.25	0.032	7.03	0.038	0.79	1.92	0.43	12.5	5.47	76.4	31.6	156	38.1	405	69.7	9697	0.56	78.2	211	69.86	15.32	3.01	4.43	1.21	7.73	29.9	2.65	0.96	1.92	0.59	2.74	10.3	0.33
X11-114-1_z25	Zong et al. (2013)	X11-114-1	Tarim	Dunhuang	Igneous_plutonic	N/A	Y	2450	78					11.8		1033	1.86		9.02	0.009		1.84	0.45	14.9	5.57	80	34.5	169	41.8	451	75.8	11258	1.24	94.7	337	69.86	15.32	3.01	4.43	1.21	7.73	29.9	2.65	0.96	1.92	0.59	2.74	10.3	0.33
X11-114-1_z26	Zong et al. (2013)	X11-114-1	Tarim	Dunhuang	Igneous_plutonic	N/A	Y	2483	78					7.8		1302	1.61	0.007	11.9	0.002	1.07	2.43	0.4	17.2	7.11	102	43.7	216	54.9	576	91.7	9997	0.97	101	318	69.86	15.32	3.01	4.43	1.21	7.73	29.9	2.65	0.96	1.92	0.59	2.74	10.3	0.33
X11-114-1_z27	Zong et al. (2013)	X11-114-1	Tarim	Dunhuang	Igneous_plutonic	N/A	Y	2476	116					3.65		248	0.21	0.006	2.11		0.064	0.53	0.14	4.35	1.58	20	8.39	40.8	11	123	19.3	9563	0.2	17.1	56.5	69.86	15.32	3.01	4.43	1.21	7.73	29.9	2.65	0.96	1.92	0.59	2.74	10.3	0.33
X11-114-1_z29	Zong et al. (2013)	X11-114-1	Tarim	Dunhuang	Igneous_plutonic	N/A	Y	2522	100					5.65		867	0.31		3.79	0.086	1.91	4.55	1.38	23.6	7.16	85.3	31.2	133	30	303	48.5	8256	0.27	64.6	122	69.86	15.32	3.01	4.43	1.21	7.73	29.9	2.65	0.96	1.92	0.59	2.74	10.3	0.33
X11-114-1_z3	Zong et al. (2013)	X11-114-1	Tarim	Dunhuang	Igneous_plutonic	N/A	Y	2650	70					13.4		2218	1.91		10.9	0.23	3.93	9.84	2.23	56.4	18.7	221	80.7	331	72.7	671	102	8542	0.74	158	212	69.86	15.32	3.01	4.43	1.21	7.73	29.9	2.65	0.96	1.92	0.59	2.74	10.3	0.33
X11-114-1_z30	Zong et al. (2013)	X11-114-1	Tarim	Dunhuang	Igneous_plutonic	N/A	N	2443	100					9.44		1206	0.78		5.47	0.084	1.9	4.13	1.27	24.3	9.31	115	42.2	195	45.3	475	77.2	7918	0.5	90.5	182	69.86	15.32	3.01	4.43	1.21	7.73	29.9	2.65	0.96	1.92	0.59	2.74	10.3	0.33
X11-114-1_z31	Zong et al. (2013)	X11-114-1	Tarim	Dunhuang	Igneous_plutonic	N/A	Y	2374	92					10.2		582	0.84	0.065	3.91	0.026	0.24	0.98	0.37	8.23	3.4	45.9	19.3	95.4	23.8	252	42.7	11217	0.46	42.2	208	69.86	15.32	3.01	4.43	1.21	7.73	29.9	2.65	0.96	1.92	0.59	2.74	10.3	0.33
X11-114-1_z32	Zong et al. (2013)	X11-114-1	Tarim	Dunhuang	Igneous_plutonic	N/A	Y	2313	86					8.77		641	1.22		6.4		0.39	1.41	0.33	10.9	3.95	52.5	20.1	101	23.8	250	41.5	11494	1.11	52.8	331	69.86	15.32	3.01	4.43	1.21	7.73	29.9	2.65	0.96	1.92	0.59	2.74	10.3	0.33
X11-114-1_z5	Zong et al. (2013)	X11-114-1	Tarim	Dunhuang	Igneous_plutonic	N/A	Y	2638	84					8.45		891	0.56		3.94	0.022	0.51	2.47	0.66	14	5.56	74	29.6	141	34.6	342	60	7419	0.22	54.7	115	69.86	15.32	3.01	4.43	1.21	7.73	29.9	2.65	0.96	1.92	0.59	2.74	10.3	0.33
X11-114-1_z7	Zong et al. (2013)	X11-114-1	Tarim	Dunhuang	Igneous_plutonic	N/A	Y	2218	98					7.28		632	0.78		4.72	0.034	0.95	1.81	0.33	10.3	4.61	56.4	20.5	91.3	21	211	34.4	11758	0.93	57.8	234	69.86	15.32	3.01	4.43	1.21	7.73	29.9	2.65	0.96	1.92	0.59	2.74	10.3	0.33
X11-114-1_z8	Zong et al. (2013)	X11-114-1	Tarim	Dunhuang	Igneous_plutonic	N/A	Y	2189	92					8.57		457	0.94	0.037	3.38	0.031	0.51	0.81	0.18	7.57	2.96	37.8	13.9	62.4	15	152	25.7	11004	1.06	69.5	172	69.86	15.32	3.01	4.43	1.21	7.73	29.9	2.65	0.96	1.92	0.59	2.74	10.3	0.33
X11-122-1_z1	Zong et al. (2013)	X11-122-1	Tarim	Dunhuang	Igneous_plutonic	N/A	N	2625	54					3.43		252	0.52		6.37		0.18	0.57	0.21	4.34	1.62	20.9	7.97	40.5	10.3	111	19.5	11180	0.6	35.2	97.4	71.63	16.02	3.44	4.85	0.95	3.46	14.2	1.73	0.79	1.3	0.15	1.18	0.82	0.43
X11-122-1_z10	Zong et al. (2013)	X11-122-1	Tarim	Dunhuang	Igneous_plutonic	N/A	N	2718	56					4.74		459	0.92	2.6	15.2	1.02	5.39	3.1	0.64	11.4	3.55	40.7	15.5	71.8	17.6	180	32.8	9514	0.58	59	123	71.63	16.02	3.44	4.85	0.95	3.46	14.2	1.73	0.79	1.3	0.15	1.18	0.82	0.43
X11-122-1_z11	Zong et al. (2013)	X11-122-1	Tarim	Dunhuang	Igneous_plutonic	N/A	Y	2627	42					5.21		382	0.92	0.044	10.6	0.009	0.67	1.41	0.35	8.49	2.76	33.6	12.7	57.4	14.3	145	25.3	10191	0.64	137	179	71.63	16.02	3.44	4.85	0.95	3.46	14.2	1.73	0.79	1.3	0.15	1.18	0.82	0.43
X11-122-1_z13	Zong et al. (2013)	X11-122-1	Tarim	Dunhuang	Igneous_plutonic	N/A	N	2636	60					4.57		307	0.72		6.13	0.018	0.26	0.9	0.21	5.5	2.01	25.9	10.2	50.1	12.6	130	24.1	10638	0.53	41.4	127	71.63	16.02	3.44	4.85	0.95	3.46	14.2	1.73	0.79	1.3	0.15	1.18	0.82	0.43
X11-122-1_z16	Zong et al. (2013)	X11-122-1	Tarim	Dunhuang	Igneous_plutonic	N/A	Y	2162	68					7.2		301	1.29	0.042	6.22	0.053	0.67	0.91	0.24	6.74	2.3	27.3	9.88	40.3	8.85	89	14.9	10602	1.46	66.3	697	71.63	16.02	3.44	4.85	0.95	3.46	14.2	1.73	0.79	1.3	0.15	1.18	0.82	0.43
X11-122-1_z20	Zong et al. (2013)	X11-122-1	Tarim	Dunhuang	Igneous_plutonic	N/A	N	2520	48					7.12		410	0.59	0.1	7.29	0.23	2.98	2.42	0.71	10.1	2.99	35.1	13.6	63.6	15.6	157	28.1	8160	0.36	42.9	86.2	71.63	16.02	3.44	4.85	0.95	3.46	14.2	1.73	0.79	1.3	0.15	1.18	0.82	0.43
X11-122-1_z21	Zong et al. (2013)	X11-122-1	Tarim	Dunhuang	Igneous_plutonic	N/A	N	2697	64					6.9		455	0.71	3.15	14	0.83	4.35	2.24	0.53	9.93	3.24	38.8	14.9	69.9	17.2	181	31.8	8942	0.41	51.8	109	71.63	16.02	3.44	4.85	0.95	3.46	14.2	1.73	0.79	1.3	0.15	1.18	0.82	0.43
X11-122-1_z23	Zong et al. (2013)	X11-122-1	Tarim	Dunhuang	Igneous_plutonic	N/A	Y	2716	54					8.49		657	0.58	0.036	11.8	0.15	2.85	4.76	1.17	21.9	6.44	65.2	22.7	94.8	21.4	214	35.2	9859	0.36	116	172	71.63	16.02	3.44	4.85	0.95	3.46	14.2	1.73	0.79	1.3	0.15	1.18	0.82	0.43
X11-122-1_z25	Zong et al. (2013)	X11-122-1	Tarim	Dunhuang	Igneous_plutonic	N/A	N	2611	48					6.17		1088	1.72	1.09	30.7	0.63	4.73	5.16	1.35	29.1	9.42	104	37.3	160	36.5	342	55.8	9662	0.81	259	333	71.63	16.02	3.44	4.85	0.95	3.46	14.2	1.73	0.79	1.3	0.15	1.18	0.82	0.43
X11-122-1_z3.1	Zong et al. (2013)	X11-122-1	Tarim	Dunhuang	Igneous_plutonic	N/A	Y	2666	48					8.76		897	1.55	0.028	13.9	0.053	1.29	2.75	0.79	18.3	6.29	80.1	31.3	140	32.3	319	52.4	9892	0.72	133	256	71.63	16.02	3.44	4.85	0.95	3.46	14.2	1.73	0.79	1.3	0.15	1.18	0.82	0.43
X11-122-1_z3.2	Zong et al. (2013)	X11-122-1	Tarim	Dunhuang	Igneous_plutonic	N/A	Y	2624	58					6.63		244	1.31	0.05	6.43	0.17	1.61	1.7	0.47	5.8	1.71	19.4	7.89	37.8	9.47	101	18.4	11127	0.64	27.5	107	71.63	16.02	3.44	4.85	0.95	3.46	14.2	1.73	0.79	1.3	0.15	1.18	0.82	0.43
X11-122-1_z32	Zong et al. (2013)	X11-122-1	Tarim	Dunhuang	Igneous_plutonic	N/A	Y	2733	48					7.17		410	0.53		7.73	0.013	0.45	1.37	0.43	8.03	2.61	33.2	13.2	62.5	16	172	31.9	11202	0.4	60.5	196	71.63	16.02	3.44	4.85	0.95	3.46	14.2	1.73	0.79	1.3	0.15	1.18	0.82	0.43
X11-122-1_z37	Zong et al. (2013)	X11-122-1	Tarim	Dunhuang	Igneous_plutonic	N/A	Y	2602	58					6.97		238	0.47	0.005	4.94	0.002	0.09	0.43	0.18	3.4	1.48	18.6	7.68	38.4	10.2	115	21.6	10919	0.42	26.3	161	71.63	16.02	3.44	4.85	0.95	3.46	14.2	1.73	0.79	1.3	0.15	1.18	0.82	0.43
X11-122-1_z38	Zong et al. (2013)	X11-122-1	Tarim	Dunhuang	Igneous_plutonic	N/A	Y	2732	52					7.41		751	0.79	0.016	14.4	0.087	2.15	3.63	0.95	20.2	6.06	70.9	25.5	115	27.4	270	44.6	9740	0.58	127	202	71.63	16.02	3.44	4.85	0.95	3.46	14.2	1.73	0.79	1.3	0.15	1.18	0.82	0.43
X11-122-1_z39	Zong et al. (2013)	X11-122-1	Tarim	Dunhuang	Igneous_plutonic	N/A	N	2488	50					12.2		555	1.61	1.24	17.2	1.22	11	6.08	1.57	19.4	4.81	51.8	18.9	83	19.4	200	34.4	10246	0.54	117	274	71.63	16.02	3.44	4.85	0.95	3.46	14.2	1.73	0.79	1.3	0.15	1.18	0.82	0.43
X11-122-1_z44	Zong et al. (2013)	X11-122-1	Tarim	Dunhuang	Igneous_plutonic	N/A	N	2638	124					9.5		674	2.81	6.78	29.1	2.01	11.2	4.46	0.7	14.6	4.81	57.5	23	107	25.3	254	43	10493	1.16	141	294	71.63	16.02	3.44	4.85	0.95	3.46	14.2	1.73	0.79	1.3	0.15	1.18	0.82	0.43
X11-122-1_z48	Zong et al. (2013)	X11-122-1	Tarim	Dunhuang	Igneous_plutonic	N/A	N	2558	58					16		411	1.95	3.66	60	4.4	26.7	15.2	3.16	19.6	3.87	36.6	12.7	60.6	15.6	172	35	12770	3.95	77.7	548	71.63	16.02	3.44	4.85	0.95	3.46	14.2	1.73	0.79	1.3	0.15	1.18	0.82	0.43
X11-122-1_z49	Zong et al. (2013)	X11-122-1	Tarim	Dunhuang	Igneous_plutonic	N/A	Y	2644	62					7.16		214	0.67	0.006	6.59	0.016	0.22	0.63	0.19	4.18	1.51	17.6	6.9	34.1	8.04	84.8	16.2	11139	0.51	37.2	152	71.63	16.02	3.44	4.85	0.95	3.46	14.2	1.73	0.79	1.3	0.15	1.18	0.82	0.43
X11-122-1_z6	Zong et al. (2013)	X11-122-1	Tarim	Dunhuang	Igneous_plutonic	N/A	N	2287	66					2.88		297	0.89		5.46	0.038	0.18	0.96	0.17	4.4	1.85	23.4	9.73	48.5	12.3	133	23.4	10421	0.46	39.1	97.2	71.63	16.02	3.44	4.85	0.95	3.46	14.2	1.73	0.79	1.3	0.15	1.18	0.82	0.43
NPDR-z56-1	Kitajima et al. (2012)	NPDR-96NS-410	Pilbara	North Pole Dome	Igneous_volcanic	core	N	3609	39	16.1		2547	838.4	33.6	681.5	2490		0.32	17.7	1.2	11.1	13	12.8	78	50	403	98	281	50	400	76	13530		235	393
NPDR-z56-2	Kitajima et al. (2012)	NPDR-96NS-410	Pilbara	North Pole Dome	Igneous_volcanic	rim	N	3450	50	16.4		1316	446.4	19.9	368.7	1655		0.06	16.1	0.2	2.5	4.8	6.5	50	33	256	62	183	32	275	52	13333		192	319
NPDR-z59	Kitajima et al. (2012)	NPDR-96NS-410	Pilbara	North Pole Dome	Igneous_volcanic	core	Y	3425	39	3.4		417	137	4.3	54.8	584		0.16	10.3	0.1	1.6	1.9	1.6	13	7	60	20	79	18	169	37	12900		76	163
NPDR-z60	Kitajima et al. (2012)	NPDR-96NS-410	Pilbara	North Pole Dome	Igneous_volcanic	core	N	3377	40	14.9		1795	953.8	22.8	875.4	2379		0.07	18.4	0.3	3.4	6.4	8.5	61	45	359	87	263	50	431	83	13400		207	393
NPDR-z61	Kitajima et al. (2012)	NPDR-96NS-410	Pilbara	North Pole Dome	Igneous_volcanic	core	Y	3489	40	5.6		347	21.3	3.8	22.4	787		0.06	23.3	0.3	3.7	5.2	2.8	20	7	72	26	106	24	236	49	11600		124	187
NPDR-z62	Kitajima et al. (2012)	NPDR-96NS-410	Pilbara	North Pole Dome	Igneous_volcanic	core	N	3295	40	4.9		238	48.1	2.9	30.1	830		0.02	12.7	0.1	2.1	3.5	1.2	19	9	84	30	119	27	253	52	13200		126	227
NPDR-z65	Kitajima et al. (2012)	NPDR-96NS-410	Pilbara	North Pole Dome	Igneous_volcanic	core	Y	3450	50	16.3		338	35.9	2.6	57.9	801		0.02	11.9	0.1	1	2.4	0.8	14	6	62	24	109	25	250	54	14200		119	300
NPDR-z66-1	Kitajima et al. (2012)	NPDR-96NS-410	Pilbara	North Pole Dome	Igneous_volcanic	core	Y	3450	50	1.4		616	85.4	3.1	105.7	806		0.23	14.9	0.9	8.3	7.8	4.1	22	9	84	28	108	23	213	45	13100		114	209
NPDR-z66-2	Kitajima et al. (2012)	NPDR-96NS-410	Pilbara	North Pole Dome	Igneous_volcanic	rim	N	3450	50	18		784	265.7	8.7	252.2	1453		0.08	18.4	0.4	5.8	7.9	4.5	43	21	166	48	170	34	307	63	13500		229	316
NPDR-z67	Kitajima et al. (2012)	NPDR-96NS-410	Pilbara	North Pole Dome	Igneous_volcanic	core	N	3350	57	17.6		1077	402.9	23.4	416.3	1718		0.03	17.5	0.1	2.2	4.5	6.2	48	32	247	62	187	37	315	61	12900		182	351
NPDR-z68-1	Kitajima et al. (2012)	NPDR-96NS-410	Pilbara	North Pole Dome	Igneous_volcanic	core	Y	3702	55	4.9		440	83.4	4.4	107.8	893		0.05	11	0.2	1.8	4.2	2.4	20	11	100	31	117	25	234	47	13600		101	244
NPDR-z68-2	Kitajima et al. (2012)	NPDR-96NS-410	Pilbara	North Pole Dome	Igneous_volcanic	rim	N	3450	50	10.5		718	217.1	8.2	180.8	1095		0.22	14.7	0.9	7.5	6.6	5	30	16	136	38	135	29	258	53	12800		108	238
NPDR-z69	Kitajima et al. (2012)	NPDR-96NS-410	Pilbara	North Pole Dome	Igneous_volcanic	Core	N	3422	56	9.2		209	12.5	4	33.7	690		0.1	16.7	0.1	1.9	2.8	0.9	14	6	56	22	95	22	199	44	12000		121	218
NPDR-z71-1	Kitajima et al. (2012)	NPDR-96NS-410	Pilbara	North Pole Dome	Igneous_volcanic	core	N	3636	55	12.2		760	203.8	11.7	243.8	1211		0.01	13.9	0.1	2.1	3.9	3.1	29	16	131	39	133	29	262	55	12300		134	299
NPDR-z71-2	Kitajima et al. (2012)	NPDR-96NS-410	Pilbara	North Pole Dome	Igneous_volcanic	rim	N	3450	50	8.7		618	276.6	5.6	251	854		0.1	12.6	0.2	1.9	2.8	2.1	21	12	98	26	96	20	182	37	14500		145	259
NPDR-z72-2	Kitajima et al. (2012)	NPDR-96NS-410	Pilbara	North Pole Dome	Igneous_volcanic	rim	N	3450	50	11.7		766	328.8	13.1	448.4	1066		0.03	14.7	0.1	1.8	3.8	3.9	30	19	153	39	122	23	192	39	13100		244	320
NPDR-z74-1	Kitajima et al. (2012)	NPDR-96NS-410	Pilbara	North Pole Dome	Igneous_volcanic	core	N	3378	56	18		775	157.7	11.2	239.1	3093		0.08	19.5	0.8	13.2	22.4	9.4	96	36	300	99	385	80	680	135	9300		334	350
NPDR-z74-2	Kitajima et al. (2012)	NPDR-96NS-410	Pilbara	North Pole Dome	Igneous_volcanic	rim	N	3450	50	1.9		234	35.7	1.7	48.6	323		0.11	7.3	0.3	3.5	3.1	1.9	9	4	31	10	40	9	86	18	14500		52	147
NPDR-z75	Kitajima et al. (2012)	NPDR-96NS-410	Pilbara	North Pole Dome	Igneous_volcanic	core	N	3275	57	9.3		561	127.2	5.6	108.4	1028		0.09	16	0.2	2.9	4.8	2.7	26	13	106	33	122	27	245	52	12500		144	256
NPDR-z76-1	Kitajima et al. (2012)	NPDR-96NS-410	Pilbara	North Pole Dome	Igneous_volcanic	core	N	3335	52	15.8		1188	492.1	14.4	314	1544		0.03	17.1	0.2	2.3	4.9	4.8	42	25	174	45	149	32	261	55	11700		164	278
NPDR-z77-1	Kitajima et al. (2012)	NPDR-96NS-410	Pilbara	North Pole Dome	Igneous_volcanic	core	N	3349	52	16.4		1897	738.2	38.9	518.6	3098		0.07	14.7	0.3	4.8	12	17.2	119	66	459	106	311	54	432	83	11900		228	404
NPDR-z77-2	Kitajima et al. (2012)	NPDR-96NS-410	Pilbara	North Pole Dome	Igneous_volcanic	rim	N	3450	50	8.5		814	184.4	21.3	233.1	1419		0.05	14.2	0.2	3.5	6	5.8	50	24	180	47	160	33	279	58	13700		185	321
NPDR-z78-1	Kitajima et al. (2012)	NPDR-96NS-410	Pilbara	North Pole Dome	Igneous_volcanic	core	N	3450	50	25.2		1829	777.4	34.1	655.4	2461		0.08	19.6	0.3	3.2	6.8	7.8	69	44	342	83	250	48	386	73	11600		221	445
NPDR-z78-2	Kitajima et al. (2012)	NPDR-96NS-410	Pilbara	North Pole Dome	Igneous_volcanic	rim	N	3450	50	16.2		673	287.4	10.9	235.5	1177		0.04	13.9	0.1	1.3	3.2	3.1	30	17	139	38	126	28	234	48	12400		121	299
NPDR-z79-1	Kitajima et al. (2012)	NPDR-96NS-410	Pilbara	North Pole Dome	Igneous_volcanic	core	N	3450	50	14.6		4076	1613.6	59.1	1213.2	4261		0.11	21.1	0.5	5.4	12.4	15.2	128	84	605	136	391	71	536	98	9900		276	493
NPDR-z79-2	Kitajima et al. (2012)	NPDR-96NS-410	Pilbara	North Pole Dome	Igneous_volcanic	rim	N	3450	50	11.4		1504	524.8	20.6	448.4	1655		0.04	13.3	0.3	3.4	5	5.1	52	28	190	45	137	28	225	44	12200		177	339
NPDR-z80	Kitajima et al. (2012)	NPDR-96NS-410	Pilbara	North Pole Dome	Igneous_volcanic	core	N	3660	50	10		1111	313.6	11.1	273.6	1245		0.15	14.3	0.6	5.7	7.4	5.2	37	21	168	43	146	27	246	48	13100		131	221
NPDR-z81	Kitajima et al. (2012)	NPDR-96NS-410	Pilbara	North Pole Dome	Igneous_volcanic	core	Y	3355	52	8.9		244	79.3	3.1	47.5	955		0.19	16.6	0.2	3.7	5.2	1.8	25	11	100	32	129	27	251	51	13400		154	229
NPDR-z82	Kitajima et al. (2012)	NPDR-96NS-410	Pilbara	North Pole Dome	Igneous_volcanic	core	N	3271	52	10.7		1060	405	18.5	295	1269		0.1	13.4	0.3	3.5	5.1	5.3	40	24	181	42	136	24	221	42	13200		136	230
NPDR-z83-1	Kitajima et al. (2012)	NPDR-96NS-410	Pilbara	North Pole Dome	Igneous_volcanic	core	N	3374	52	23.1		3529	1391.5	96.7	2557.2	4420		0.19	35.2	0.5	7.4	16.3	24.6	133	93	772	176	482	82	641	107	12800		909	1024
NPDR-z83-2	Kitajima et al. (2012)	NPDR-96NS-410	Pilbara	North Pole Dome	Igneous_volcanic	rim	N	3450	50	18.4		683	263.5	9.1	306.9	1038		0.02	16.8	0.1	1.8	3.4	2.8	25	16	136	37	126	24	217	44	13500		212	332
NPDR-z84-1	Kitajima et al. (2012)	NPDR-96NS-410	Pilbara	North Pole Dome	Igneous_volcanic	core	N	3678	50	19.2		1470	629.3	28.8	440.1	2070		0.08	14.8	0.2	2.9	6.9	6.7	61	39	296	71	215	38	343	66	13500		180	308
NPDR-z84-2	Kitajima et al. (2012)	NPDR-96NS-410	Pilbara	North Pole Dome	Igneous_volcanic	rim	N	3450	50	10.2		813	170.1	11.1	176	1004		0.06	16.7	0.2	2	3.3	2.4	25	15	126	36	125	25	225	48	12700		132	262
NPDR-z85	Kitajima et al. (2012)	NPDR-96NS-410	Pilbara	North Pole Dome	Igneous_volcanic	core	Y	3450	50	0.4		203	3.7	2.7	5	579		0.01	9.4	0.1	1.1	2.4	0.5	12	4	48	17	79	17	173	38	13000		69	156
F2-01	This study	JB17-F2	Kaapvaal	S Barberton	Igneous_volcanic	Core	Y	3471	28	146	2.8	143	-10	5.04538		1348.95	1.15425	0.46	11.87	0.83	8.1	7.42	3.24	32.2	10	112	41.3	185	42.5	422	79.9	9530	0.747	165.6	286.4	72.6406	15.1271	2.07079	5.09602	1.3698	5.96495	18.5623	1.72048	0.606016	1.63385	0.43689	3.02679	4.12061	1.20004
F2-02	This study	JB17-F2	Kaapvaal	S Barberton	Igneous_volcanic	Rim	N	3460	34	97.6	126	108.5	1050	195.305		459.946	0.87425	2.58	15.4	1.99	16	11.65	7.12	19.6	3.87	40.6	15.58	72.7	17.59	192.9	40.5	11220	0.474	148.9	264	72.6406	15.1271	2.07079	5.09602	1.3698	5.96495	18.5623	1.72048	0.606016	1.63385	0.43689	3.02679	4.12061	1.20004
F2-03	This study	JB17-F2	Kaapvaal	S Barberton	Igneous_volcanic	Core	N	3475	28	115.6	110.8	357.3	1520	14.5394		2928.95	3.07425	0.345	21.4	0.412	5.44	9.73	2.71	62.9	21.9	256	93	377	74.1	616	106.8	8158	1.23	149	220.5	72.6406	15.1271	2.07079	5.09602	1.3698	5.96495	18.5623	1.72048	0.606016	1.63385	0.43689	3.02679	4.12061	1.20004
F2-04	This study	JB17-F2	Kaapvaal	S Barberton	Igneous_volcanic	Core	Y	3454	30	68.8	0.7	393	-17	6.72363		2459.95	1.85425	0.032	11.56	0.266	4.22	9.85	2.63	61.2	19.89	225.7	78	312.8	61.9	524	89.2	7830	0.986	102.4	167.4	72.6406	15.1271	2.07079	5.09602	1.3698	5.96495	18.5623	1.72048	0.606016	1.63385	0.43689	3.02679	4.12061	1.20004
F2-05	This study	JB17-F2	Kaapvaal	S Barberton	Igneous_volcanic	Core	Y	3452	29	94.8	3.4	325.2	-189	5.60605		3458.95	2.36425	0.103	19.06	0.533	8.79	17.7	4.44	97.4	30.3	328	109.5	425	82.7	674	111.7	8720	1.187	170.1	242	72.6406	15.1271	2.07079	5.09602	1.3698	5.96495	18.5623	1.72048	0.606016	1.63385	0.43689	3.02679	4.12061	1.20004
F2-06	This study	JB17-F2	Kaapvaal	S Barberton	Igneous_volcanic	Core	N	3471	35	24.7	373	342	3210	2321.96		1152.95	7.36425	48.2	278	40.4	204	55.1	29.9	66.6	12.16	108.2	36.7	151.6	30.14	271.8	52.8	9310	1.06	231	254.3	72.6406	15.1271	2.07079	5.09602	1.3698	5.96495	18.5623	1.72048	0.606016	1.63385	0.43689	3.02679	4.12061	1.20004
F2-07	This study	JB17-F2	Kaapvaal	S Barberton	Igneous_volcanic	Core	N	3469	36	158.8	95	131.4	2170	6.59697		405.946	0.52425	4.06	27	3.19	23	9.5	7.1	14.4	3	32.9	13.19	63.3	15.8	175.9	39.6	11320	0.417	104.1	240.2	72.6406	15.1271	2.07079	5.09602	1.3698	5.96495	18.5623	1.72048	0.606016	1.63385	0.43689	3.02679	4.12061	1.20004
F2-08	This study	JB17-F2	Kaapvaal	S Barberton	Igneous_volcanic	Core	Y	3464	31	125.6	4.3	476	-101	4.42159		1620.95	1.74425	-0.002	10.62	0.087	1.65	4.71	1.28	30	10.38	125.9	48.5	213	45.3	406	72.4	8300	0.968	81.6	177	72.6406	15.1271	2.07079	5.09602	1.3698	5.96495	18.5623	1.72048	0.606016	1.63385	0.43689	3.02679	4.12061	1.20004
F2-09	This study	JB17-F2	Kaapvaal	S Barberton	Igneous_volcanic	Rim	N	3461	32	143.5	126.6	284	0	9.33124		2367.95	1.81425	2.98	32.2	2.75	22	16.7	6.9	60.3	18	195.2	68.8	292	61.5	546	101.6	8870	0.92	252	328.4	72.6406	15.1271	2.07079	5.09602	1.3698	5.96495	18.5623	1.72048	0.606016	1.63385	0.43689	3.02679	4.12061	1.20004
F2-10	This study	JB17-F2	Kaapvaal	S Barberton	Igneous_volcanic	Core	N	3457	31	139.7	730	162	1090	198.56		521.946	0.88425	1.71	14.3	1.34	8.9	5.72	2.47	13.7	3.69	40.7	16.23	78	19.29	206.2	44.8	9400	0.523	74.9	204.9	72.6406	15.1271	2.07079	5.09602	1.3698	5.96495	18.5623	1.72048	0.606016	1.63385	0.43689	3.02679	4.12061	1.20004
F2-11	This study	JB17-F2	Kaapvaal	S Barberton	Igneous_volcanic	Rim	N	3418	29	124.5	54.2	230	1160	11.2951		1215.95	2.05425	1.83	24.8	1.48	10.58	7.93	3.28	24.3	7.99	97.3	38.1	175.1	38.6	365	71.9	9510	0.869	132.3	275.7	72.6406	15.1271	2.07079	5.09602	1.3698	5.96495	18.5623	1.72048	0.606016	1.63385	0.43689	3.02679	4.12061	1.20004
F2-12	This study	JB17-F2	Kaapvaal	S Barberton	Igneous_volcanic	Rim	N	3399	32	47.4	571	294	900	40.4716		1960.95	4.60425	67.9	380	52.6	292	116.6	44.3	131.4	22.39	175.7	52.9	207.2	43.05	386	68.2	10050	1.22	308.4	337.3	72.6406	15.1271	2.07079	5.09602	1.3698	5.96495	18.5623	1.72048	0.606016	1.63385	0.43689	3.02679	4.12061	1.20004
F2-13	This study	JB17-F2	Kaapvaal	S Barberton	Igneous_volcanic	Core	N	3452	34	72.6	333	315	-210	7.7471		1272.95	1.18425	2.27	21	1.82	14.7	11.47	4.14	35.6	10.52	118.3	42.6	172.7	34.3	292	53	5360	0.605	245.2	141.4	72.6406	15.1271	2.07079	5.09602	1.3698	5.96495	18.5623	1.72048	0.606016	1.63385	0.43689	3.02679	4.12061	1.20004
F2-14	This study	JB17-F2	Kaapvaal	S Barberton	Igneous_volcanic	Core	N	3452	36	150.4	66.2	157.7	310	7.25884		514.946	0.58425	2.7	15.2	2.31	17.5	8.7	4.64	13.78	3.66	42.3	16.92	82.3	20.48	231.2	48.4	10390	0.426	97	214.6	72.6406	15.1271	2.07079	5.09602	1.3698	5.96495	18.5623	1.72048	0.606016	1.63385	0.43689	3.02679	4.12061	1.20004
F2-15	This study	JB17-F2	Kaapvaal	S Barberton	Igneous_volcanic	Rim	N	3365.9	27	45.1	851	2330	7000	33.7444		1287.95	4.80425	56	269	37.2	200	65.2	23.8	77.1	15.06	127.6	40.27	165.5	34.81	311.2	55.91	9561	1.049	263.2	313.5	72.6406	15.1271	2.07079	5.09602	1.3698	5.96495	18.5623	1.72048	0.606016	1.63385	0.43689	3.02679	4.12061	1.20004
F2-16	This study	JB17-F2	Kaapvaal	S Barberton	Igneous_volcanic	Core	N	3460	30	152.3	64.9	183	-130	12.3151		918.946	1.04425	2.37	21.01	1.87	15.11	9.57	5.82	25.2	7.14	80.6	30.43	140.6	32.87	345	67	9340	0.65	175.2	281.9	72.6406	15.1271	2.07079	5.09602	1.3698	5.96495	18.5623	1.72048	0.606016	1.63385	0.43689	3.02679	4.12061	1.20004
F2-17	This study	JB17-F2	Kaapvaal	S Barberton	Igneous_volcanic	Rim	N	3295	30	16.4	2130	474	4580	128.25		4518.95	8.07425	406	2070	223	1217	519	236	515	71.5	429	103.2	340	63.1	513	90.1	10040	1.49	519	504	72.6406	15.1271	2.07079	5.09602	1.3698	5.96495	18.5623	1.72048	0.606016	1.63385	0.43689	3.02679	4.12061	1.20004
F2-18	This study	JB17-F2	Kaapvaal	S Barberton	Igneous_volcanic	Rim	N	3458	30	156.1	29.5	189.7	740	11.23		950.946	1.06225	0.94	11.81	0.825	6.66	5.16	2.56	20.9	6.77	79.6	31.6	143.7	34.7	352	74	8910	0.683	163.8	313.3	72.6406	15.1271	2.07079	5.09602	1.3698	5.96495	18.5623	1.72048	0.606016	1.63385	0.43689	3.02679	4.12061	1.20004
F2-19	This study	JB17-F2	Kaapvaal	S Barberton	Igneous_volcanic	Core	Y	3445	34	92.8	42.9	499	50	9.12154		5428.95	4.60425	0.376	29.15	0.879	14.2	31.2	8.17	168.6	52.3	557	187.2	702	133.9	1079	173.7	8470	1.8	332	386	72.6406	15.1271	2.07079	5.09602	1.3698	5.96495	18.5623	1.72048	0.606016	1.63385	0.43689	3.02679	4.12061	1.20004
F2-20	This study	JB17-F2	Kaapvaal	S Barberton	Igneous_volcanic	Rim	N	3433	45	175.5	1310	207	10500	305.978		487.946	1.57425	16.7	50.4	8.3	55	29.3	13.2	31.4	5.37	39.5	14.1	71	18.4	174	41.2	7950	0.42	92	187	72.6406	15.1271	2.07079	5.09602	1.3698	5.96495	18.5623	1.72048	0.606016	1.63385	0.43689	3.02679	4.12061	1.20004
F2-21	This study	JB17-F2	Kaapvaal	S Barberton	Igneous_volcanic	Core	N	3466	28	151.9	45.8	205	2680	8.89723		773.946	0.92425	1.63	16.4	1.58	14.2	7.7	5.02	19.2	5.31	62.9	23.8	119	26.9	275	61.3	10110	0.6	129	241.1	72.6406	15.1271	2.07079	5.09602	1.3698	5.96495	18.5623	1.72048	0.606016	1.63385	0.43689	3.02679	4.12061	1.20004
F2-22	This study	JB17-F2	Kaapvaal	S Barberton	Igneous_volcanic	Core	N	3387	29	50.1	1362	3210	11500	68.5738		2667.95	6.00425	211.6	1000	125.4	698	277.9	107.4	267.9	38.3	249.2	64.4	229.3	43.09	365.2	64.86	9740	1.332	436.3	358.6	72.6406	15.1271	2.07079	5.09602	1.3698	5.96495	18.5623	1.72048	0.606016	1.63385	0.43689	3.02679	4.12061	1.20004
F2-23	This study	JB17-F2	Kaapvaal	S Barberton	Igneous_volcanic	Core	N	3432	30	39	85.9	2030	5430	50.9963		996.946	2.27425	37	124.3	15	75.6	24	8.16	41.8	9.48	97.2	33.11	144	29.86	278.4	54.2	9050	0.68	169	221	72.6406	15.1271	2.07079	5.09602	1.3698	5.96495	18.5623	1.72048	0.606016	1.63385	0.43689	3.02679	4.12061	1.20004
F2-24	This study	JB17-F2	Kaapvaal	S Barberton	Igneous_volcanic	Core	Y	3463	34	85	13.5	263	420	6.19551		945.946	1.07425	0.34	8.47	0.251	2.64	3.79	1.43	19.1	6.71	82	32.2	145	33.3	333	66.8	9680	0.72	94	223	72.6406	15.1271	2.07079	5.09602	1.3698	5.96495	18.5623	1.72048	0.606016	1.63385	0.43689	3.02679	4.12061	1.20004
F2-25	This study	JB17-F2	Kaapvaal	S Barberton	Igneous_volcanic	Rim	N	3461	29	156	213	279	1040	12.0438		2688.95	2.70425	4.03	34.1	2.74	22.7	20.8	8.7	72.8	20.9	220	77.7	335	70.3	658	119.2	9430	1.078	315	389	72.6406	15.1271	2.07079	5.09602	1.3698	5.96495	18.5623	1.72048	0.606016	1.63385	0.43689	3.02679	4.12061	1.20004
F2-26	This study	JB17-F2	Kaapvaal	S Barberton	Igneous_volcanic	Core	Y	3483	39	80.7	35	399	30	6.89723		1648.95	1.62425	0.217	11.66	0.285	3.83	6.29	1.87	35.3	12.23	138.9	51.8	217	47	408	70.7	9230	0.92	79	167.4	72.6406	15.1271	2.07079	5.09602	1.3698	5.96495	18.5623	1.72048	0.606016	1.63385	0.43689	3.02679	4.12061	1.20004
F2-27	This study	JB17-F2	Kaapvaal	S Barberton	Igneous_volcanic	Rim	N	3449	28	23	30	1590	3290	6.84653		879.946	1.50425	19.7	71	6.6	32.7	11.3	3.08	26.2	7.34	78.3	28.7	125.2	27.2	254	47	9060	0.646	125.3	180	72.6406	15.1271	2.07079	5.09602	1.3698	5.96495	18.5623	1.72048	0.606016	1.63385	0.43689	3.02679	4.12061	1.20004
F2-28	This study	JB17-F2	Kaapvaal	S Barberton	Igneous_volcanic	Core	Y	3465	30	176.3	19.1	111	120	3.39614		637.946	0.53025	0.34	5.51	0.37	3.42	3.48	1.74	16.1	5.05	57.1	21.24	97.6	21.62	216.6	46.67	10900	0.524	143.4	313.1	72.6406	15.1271	2.07079	5.09602	1.3698	5.96495	18.5623	1.72048	0.606016	1.63385	0.43689	3.02679	4.12061	1.20004
F2-29	This study	JB17-F2	Kaapvaal	S Barberton	Igneous_volcanic	Core	N	3467	29	151.4	14.3	145.5	76	3.7976		687.946	0.75025	0.645	10.8	0.82	8.6	4.9	1.09	15.9	4.91	57.5	22.28	104.9	25.23	264	55.9	9340	0.596	116.3	255.8	72.6406	15.1271	2.07079	5.09602	1.3698	5.96495	18.5623	1.72048	0.606016	1.63385	0.43689	3.02679	4.12061	1.20004
F2-30	This study	JB17-F2	Kaapvaal	S Barberton	Igneous_volcanic	Core	N	3466	30	90.5	149	273.9	610	10.1667		2999.95	2.06425	0.156	14.92	0.447	7.68	15.3	4.02	84.5	26.03	282	97	373	71.6	592	99.9	8990	1.057	144.4	214.6	72.6406	15.1271	2.07079	5.09602	1.3698	5.96495	18.5623	1.72048	0.606016	1.63385	0.43689	3.02679	4.12061	1.20004
F2-31	This study	JB17-F2	Kaapvaal	S Barberton	Igneous_volcanic	Rim	N	3468	34	134.8	408	407	600	45.7882		2068.95	2.54425	41.7	309	44	285	127	87	159	26.9	203	62.6	248	51.4	453	90	8820	0.81	1370	324	72.6406	15.1271	2.07079	5.09602	1.3698	5.96495	18.5623	1.72048	0.606016	1.63385	0.43689	3.02679	4.12061	1.20004
F2-32	This study	JB17-F2	Kaapvaal	S Barberton	Igneous_volcanic	Core	N	3469	29	98.7	19.4	149.4	-73	7.05268		465.946	0.55425	2.33	26.5	2.52	17.9	9.4	4.9	16.3	3.71	39.2	15	70	17.12	180.5	39.49	9460	0.491	146	188	72.6406	15.1271	2.07079	5.09602	1.3698	5.96495	18.5623	1.72048	0.606016	1.63385	0.43689	3.02679	4.12061	1.20004
F2-33	This study	JB17-F2	Kaapvaal	S Barberton	Igneous_volcanic	Rim	N	3414	33	35.9	1250	339	3700	174.69		2968.95	7.08425	263	1210	156	840	362	160	347	49.2	297	71.7	251	49.6	412	71.6	9840	1.31	468	342	72.6406	15.1271	2.07079	5.09602	1.3698	5.96495	18.5623	1.72048	0.606016	1.63385	0.43689	3.02679	4.12061	1.20004
F2-34	This study	JB17-F2	Kaapvaal	S Barberton	Igneous_volcanic	Core	N	3403	28	42.9	310	2320	6700	21.2666		1259.95	3.34425	47.7	198	24.2	130	45.1	15.1	60.3	12.55	118.4	40.3	169.2	35.34	320	60.8	9480	0.897	205.5	268	72.6406	15.1271	2.07079	5.09602	1.3698	5.96495	18.5623	1.72048	0.606016	1.63385	0.43689	3.02679	4.12061	1.20004
F2-35	This study	JB17-F2	Kaapvaal	S Barberton	Igneous_volcanic	Rim	N	3398	30	53.2	910	328	1100	26.3662		1075.95	2.87425	15.1	248	27.4	145	74.7	34.8	74.7	14.08	118.9	35.66	145.7	29.87	274.9	50	9560	0.946	261.2	277.8	72.6406	15.1271	2.07079	5.09602	1.3698	5.96495	18.5623	1.72048	0.606016	1.63385	0.43689	3.02679	4.12061	1.20004
F2-36	This study	JB17-F2	Kaapvaal	S Barberton	Igneous_volcanic	Rim	Y	3454	28	134.5	9.7	154	-82	5.24069		1388.95	1.19425	0.151	9.04	0.341	5.01	7.47	2.72	33.4	10.72	123.3	43.8	188.4	39.7	368	68.3	9080	0.755	109.3	193	72.6406	15.1271	2.07079	5.09602	1.3698	5.96495	18.5623	1.72048	0.606016	1.63385	0.43689	3.02679	4.12061	1.20004
F2-37	This study	JB17-F2	Kaapvaal	S Barberton	Igneous_volcanic	Rim	N	3135	31	41.4	995	353	3340	65.6442		3108.95	7.18425	329	883	155	814	288	123	280	41.4	292	80.5	299	58.4	513	88.4	7870	1.25	475	540	72.6406	15.1271	2.07079	5.09602	1.3698	5.96495	18.5623	1.72048	0.606016	1.63385	0.43689	3.02679	4.12061	1.20004
F2-38	This study	JB17-F2	Kaapvaal	S Barberton	Igneous_volcanic	Core	N	3475	28	109.6	12.7	518	22	14.8974		3127.95	3.95425	1.84	34.6	1.78	15	16.1	6.07	74.9	24.83	279.7	98	395.1	76.7	644	110.1	7950	1.53	232	278.8	72.6406	15.1271	2.07079	5.09602	1.3698	5.96495	18.5623	1.72048	0.606016	1.63385	0.43689	3.02679	4.12061	1.20004
F5-01	This study	JB17-F5	Kaapvaal	S Barberton	Igneous_volcanic	Core	N	3384	33	92	1415	739	4210	102.21		3321.95	14.9543	228	917	92.7	451	91.7	88.2	101.7	24.77	275.9	106	457	96.7	866	147.6	9460	4.16	396	779	72.4694	15.2077	1.34813	5.89448	1.60374	4.51608	18.8347	1.77192	0.605265	1.42503	0.404155	3.00192	4.25275	1.35853
F5-02	This study	JB17-F5	Kaapvaal	S Barberton	Igneous_volcanic	Core	N	3416	29	82.1	206	269	990	295.128		858.946	3.14425	21.3	114.4	15.9	75.4	14.74	5.03	26.9	6.98	75.4	28.33	126	26.48	245.3	49.5	10130	1.36	171.7	240.3	72.4694	15.2077	1.34813	5.89448	1.60374	4.51608	18.8347	1.77192	0.605265	1.42503	0.404155	3.00192	4.25275	1.35853
F5-03	This study	JB17-F5	Kaapvaal	S Barberton	Igneous_volcanic	Core	N	3865	38	91.3	3990	530	5470	392.78		3278.95	45.6642	770	4500	476	1600	196	95.3	180	33.5	285	89	348	70.9	617	104	9680	3.33	985	1370	72.4694	15.2077	1.34813	5.89448	1.60374	4.51608	18.8347	1.77192	0.605265	1.42503	0.404155	3.00192	4.25275	1.35853
F5-04	This study	JB17-F5	Kaapvaal	S Barberton	Igneous_volcanic	Core	N	3432.2	27	58.6	101.6	470	440	13.3458		896.946	2.38425	11	58.9	5.84	24.2	6.69	1.95	23.14	7.02	80.3	29.54	128.2	27.69	260.2	50.23	9220	0.754	160.7	218	72.4694	15.2077	1.34813	5.89448	1.60374	4.51608	18.8347	1.77192	0.605265	1.42503	0.404155	3.00192	4.25275	1.35853
F5-05	This study	JB17-F5	Kaapvaal	S Barberton	Igneous_volcanic	Core	N	3444	33	74.8	119	393	570	24.9557		1036.95	2.54425	11.5	73.8	6.61	27.8	8.94	2.73	27.5	8.38	94.2	34.9	151.8	33.1	311	56	9550	0.83	178.2	253	72.4694	15.2077	1.34813	5.89448	1.60374	4.51608	18.8347	1.77192	0.605265	1.42503	0.404155	3.00192	4.25275	1.35853
F5-06	This study	JB17-F5	Kaapvaal	S Barberton	Igneous_volcanic	Rim	N	3430	34	76.2	460	539	670	49.3688		1203.95	5.97425	68.2	349.4	41.1	182.6	37.3	12.1	48	11.76	112.1	38.7	165.3	33.35	298.7	58.9	8870	0.898	203.9	339.3	72.4694	15.2077	1.34813	5.89448	1.60374	4.51608	18.8347	1.77192	0.605265	1.42503	0.404155	3.00192	4.25275	1.35853
F5-07	This study	JB17-F5	Kaapvaal	S Barberton	Igneous_volcanic	Core	N	3373	31	75.1	271	390	860	19.7475		1160.95	2.14425	21.9	142	18	89	20.5	6.45	35.8	9.83	104	38.1	166.9	34.99	316.4	63.2	9670	0.735	176.7	313.9	72.4694	15.2077	1.34813	5.89448	1.60374	4.51608	18.8347	1.77192	0.605265	1.42503	0.404155	3.00192	4.25275	1.35853
F5-08	This study	JB17-F5	Kaapvaal	S Barberton	Igneous_volcanic	Core	N	3501	30	74.9	2120	322	2360	145.394		1297.95	13.9642	166	947	121.2	445	58.9	16.6	62.4	13.17	126	42	176.1	36.2	335	67	8850	0.9	246	464	72.4694	15.2077	1.34813	5.89448	1.60374	4.51608	18.8347	1.77192	0.605265	1.42503	0.404155	3.00192	4.25275	1.35853
F5-09	This study	JB17-F5	Kaapvaal	S Barberton	Igneous_volcanic	Rim	N	3375	42	96.7	302	1070	2900	24.4131		1241.95	4.13425	43.1	210	25.2	107	18.6	8.65	33.4	9.62	105.9	37.6	168.4	36.86	352.4	62.9	9610	1.4	349	373.8	72.4694	15.2077	1.34813	5.89448	1.60374	4.51608	18.8347	1.77192	0.605265	1.42503	0.404155	3.00192	4.25275	1.35853
F5-10	This study	JB17-F5	Kaapvaal	S Barberton	Igneous_volcanic	Core	N	3402	33	80	201	426	620	70.8523		1335.95	3.88425	29.3	142.7	14.31	60	14.88	4.59	36.4	10.64	117.4	41.8	185.2	39.5	361	66.4	9650	1.1	241.2	306.3	72.4694	15.2077	1.34813	5.89448	1.60374	4.51608	18.8347	1.77192	0.605265	1.42503	0.404155	3.00192	4.25275	1.35853
F5-11	This study	JB17-F5	Kaapvaal	S Barberton	Igneous_volcanic	Core	N	3420	40	78.9	240	299	470	22.6771		922.946	2.59425	23	118	11.7	62	12.7	5	27.2	7.79	86.4	32.09	134.9	28.41	263.7	48.7	8390	0.9	260	255	72.4694	15.2077	1.34813	5.89448	1.60374	4.51608	18.8347	1.77192	0.605265	1.42503	0.404155	3.00192	4.25275	1.35853
F5-12	This study	JB17-F5	Kaapvaal	S Barberton	Igneous_volcanic	Core	N	3337	38	83.8	600	1170	3210	41.3396		1580.95	6.15425	42.6	216	25.7	131.4	31.5	7.79	48.3	12.64	129.6	46.5	196.3	41.1	385	68.3	9610	1.15	297.4	382	72.4694	15.2077	1.34813	5.89448	1.60374	4.51608	18.8347	1.77192	0.605265	1.42503	0.404155	3.00192	4.25275	1.35853
F5-13	This study	JB17-F5	Kaapvaal	S Barberton	Igneous_volcanic	Core	N	3428	26	87.5	89	232	70	14.6479		908.946	2.52425	9	72.3	5.83	25.7	7.53	3.48	24.94	7.72	84.4	30.6	133.2	28.85	269.7	50.9	9010	0.698	176.7	229.2	72.4694	15.2077	1.34813	5.89448	1.60374	4.51608	18.8347	1.77192	0.605265	1.42503	0.404155	3.00192	4.25275	1.35853
F5-14	This study	JB17-F5	Kaapvaal	S Barberton	Igneous_volcanic	Core	Y	3426	41	121.4	17.1	293	-7	5.34637		2117.35	2.10885	0.26	14	0.4	5.4	9.77	2.98	53.9	17.33	193.3	68.3	278.4	57.24	502.5	87.5	9100	0.993	141.4	242.7	72.4694	15.2077	1.34813	5.89448	1.60374	4.51608	18.8347	1.77192	0.605265	1.42503	0.404155	3.00192	4.25275	1.35853
F5-15	This study	JB17-F5	Kaapvaal	S Barberton	Igneous_volcanic	Rim	N	3355	33	87.5	269	1140	2760	43.4011		1838.95	4.45425	51	264	38.9	156	34.7	12.3	64.9	16	161.4	54.4	223.7	46.8	422	76.6	10050	1.07	334	390	72.4694	15.2077	1.34813	5.89448	1.60374	4.51608	18.8347	1.77192	0.605265	1.42503	0.404155	3.00192	4.25275	1.35853
F5-16	This study	JB17-F5	Kaapvaal	S Barberton	Igneous_volcanic	Core	N	2927	39	44.7	2116	1011	4180	52.7324		4908.95	5.03425	136.1	813	77	391	182.6	119.8	345	78.3	589	140.8	452	79.3	597	94.9	8480	1.191	782	964	72.4694	15.2077	1.34813	5.89448	1.60374	4.51608	18.8347	1.77192	0.605265	1.42503	0.404155	3.00192	4.25275	1.35853
F5-17	This study	JB17-F5	Kaapvaal	S Barberton	Igneous_volcanic	Core	N	3422	32	72.8	2490	2430	5000	21.3751		1077.95	2.37425	27.1	107	10.8	51.1	12.1	3.01	30	8.65	96	35.32	159.1	33.24	309.2	60	9420	0.81	176.6	246.7	72.4694	15.2077	1.34813	5.89448	1.60374	4.51608	18.8347	1.77192	0.605265	1.42503	0.404155	3.00192	4.25275	1.35853
F5-18	This study	JB17-F5	Kaapvaal	S Barberton	Igneous_volcanic	Core	N	3375	36	87	346	261	90	25.1727		1081.95	3.57425	14.14	104.8	9.6	39.5	10.01	3.97	28.4	8.55	95.1	35.2	152.6	32.83	310	59.1	10080	1	196.9	277.6	72.4694	15.2077	1.34813	5.89448	1.60374	4.51608	18.8347	1.77192	0.605265	1.42503	0.404155	3.00192	4.25275	1.35853
F5-19	This study	JB17-F5	Kaapvaal	S Barberton	Igneous_volcanic	Core	N	3462	30	78.6	205	930	2030	21.9176		1101.95	2.24425	34.1	208	21.88	87.9	17	3.53	32.9	9.2	97.8	35.97	156.5	33.05	298.2	58.8	9640	0.849	232	261.1	72.4694	15.2077	1.34813	5.89448	1.60374	4.51608	18.8347	1.77192	0.605265	1.42503	0.404155	3.00192	4.25275	1.35853
F5-20	This study	JB17-F5	Kaapvaal	S Barberton	Igneous_volcanic	Core	N	3405	28	81.9	506	8400	23800	40.0375		1454.95	3.92425	136	427	51.7	226	40.5	10.9	61.1	14.37	142	47.8	204.4	40.6	362.9	70	9560	0.847	261.8	307.4	72.4694	15.2077	1.34813	5.89448	1.60374	4.51608	18.8347	1.77192	0.605265	1.42503	0.404155	3.00192	4.25275	1.35853
F5-21	This study	JB17-F5	Kaapvaal	S Barberton	Igneous_volcanic	Rim	N	3311	35	107.5	690	858	2870	55.4449		1881.95	6.63425	106.2	480	45.2	170	31.8	23.3	62.8	16.27	162.5	54.5	225.6	46.8	419	73.3	9510	1.31	440	509	72.4694	15.2077	1.34813	5.89448	1.60374	4.51608	18.8347	1.77192	0.605265	1.42503	0.404155	3.00192	4.25275	1.35853
F5-22	This study	JB17-F5	Kaapvaal	S Barberton	Igneous_volcanic	Core	N	3470	32	76.1	92	544	1130	10.2626		1173.95	2.80425	11.3	78.5	6.88	27.5	8.24	2.39	28.2	9.01	103.5	38.7	167.8	37.1	339.4	62.9	10080	1.08	212.4	285.7	72.4694	15.2077	1.34813	5.89448	1.60374	4.51608	18.8347	1.77192	0.605265	1.42503	0.404155	3.00192	4.25275	1.35853
F5-23	This study	JB17-F5	Kaapvaal	S Barberton	Igneous_volcanic	Rim	N	3435	33	68.3	1095	316	1770	91.1424		1509.95	8.60425	208	914	106.9	425	65.7	73.8	74.2	15.97	142.4	47.4	193.9	38.6	336.9	64.1	9810	1.62	334	486	72.4694	15.2077	1.34813	5.89448	1.60374	4.51608	18.8347	1.77192	0.605265	1.42503	0.404155	3.00192	4.25275	1.35853
F5-24	This study	JB17-F5	Kaapvaal	S Barberton	Igneous_volcanic	Core	Y	3440	32	137.5	7.6	349	-12	5.65734		1471.45	1.61932	0.31	12.8	0.34	4.4	7.5	2.76	37.8	12.62	145.6	55.17	236.5	50.77	456.5	83.8	9790	1.038	129	241.6	72.4694	15.2077	1.34813	5.89448	1.60374	4.51608	18.8347	1.77192	0.605265	1.42503	0.404155	3.00192	4.25275	1.35853
F5-25	This study	JB17-F5	Kaapvaal	S Barberton	Igneous_volcanic	Rim	N	3371	27	33	2140	186	470	58.8085		751.946	5.30425	33.7	241	31.4	156	36.3	12.38	39.7	8.27	73.3	24.81	103.3	22.13	200.2	38.4	8560	0.6	101.8	202.8	72.4694	15.2077	1.34813	5.89448	1.60374	4.51608	18.8347	1.77192	0.605265	1.42503	0.404155	3.00192	4.25275	1.35853
F5-26	This study	JB17-F5	Kaapvaal	S Barberton	Igneous_volcanic	Rim	N	3346	40	85.9	447	1070	1300	33.0934		1291.95	7.46425	35.8	199	21.5	96	27.2	10.28	47.4	11.84	121.7	43.2	179.6	38.2	337.1	61.8	8660	1.14	304	368	72.4694	15.2077	1.34813	5.89448	1.60374	4.51608	18.8347	1.77192	0.605265	1.42503	0.404155	3.00192	4.25275	1.35853
SG3_26_35.1	Vetrin et al. (2016)	SG3_26	Fennoscandia	Kola superdeep well	Igneous_volcanic	Core	Y	2827	46	49.4	2.43	238		4.05	34.3	1272	2.27	0.017	16.1	0.23	3.69	8.44	2.55	42		120	36.9	143		235	44.3	10313	0.61	168	269
SG3_26_35.2	Vetrin et al. (2016)	SG3_26	Fennoscandia	Kola superdeep well	Igneous_volcanic	Rim	Y	2801	24	41.9	3.76	192		3.28	32.1	964	1.76	0.052	12.3	0.15	2.84	5.97	1.96	30.3		89.7	28.4	113		191	35.6	10801	0.47	118	214
SG3_26_36.1	Vetrin et al. (2016)	SG3_26	Fennoscandia	Kola superdeep well	Igneous_volcanic	Core	Y	2824	12	60.8	7.77	327		3.35	42	664	1.93	0.102	4.36	0.14	1.06	1.68	0.58	12.9		55.6	20.8	92.7		188	37.6	11235	2.3	36.4	212
SG3_26_37.1	Vetrin et al. (2016)	SG3_26	Fennoscandia	Kola superdeep well	Igneous_volcanic	Shell	Y	2814	14	98	9.43	76.1		3.25	61.8	645	2.37	0.012	5.18	0.02	0.37	1.16	0.68	12.3		58.6	21	96.4		181	36.2	11173	1.97	47.7	393
SG3_26_38.1	Vetrin et al. (2016)	SG3_26	Fennoscandia	Kola superdeep well	Igneous_volcanic	Shell	Y	2809	4	52.8	23.3	329		9.47	74.3	2507	2.75	0.037	10.4	0.33	5.82	11.2	4.19	58.4		214	75.3	325		584	114	9962	0.9	153	300
SG3_26_6.1	Vetrin et al. (2016)	SG3_26	Fennoscandia	Kola superdeep well	Igneous_volcanic	Core	Y	2845	6	37.6	3.16	531		3.36	17.5	772	2.49	0.152	8.12	0.15	1.57	2.45	0.87	16.3		65.4	24	105		207	40.1	10020	0.84	54.8	143
SG3_26_7.1	Vetrin et al. (2016)	SG3_26	Fennoscandia	Kola superdeep well	Igneous_volcanic	Core	Y	2849	14	80.5	91.7	210		4.16	63.8	639	1.84	0.044	4.24	0.05	0.74	1.95	0.55	12.2		52.6	19.6	88.9		178	36.4	10817	1.31	39.3	208
SG3_26_9.1	Vetrin et al. (2016)	SG3_26	Fennoscandia	Kola superdeep well	Igneous_volcanic	Core	Y	2849	14	13.8	0.49	127		4.44		421	1.14		3.41	0.03	0.6	1.35	0.58	8.5		34.6	13.3	60.8		126	26.1	8469	0.35	14.6	42.5
SG3_26_9.2	Vetrin et al. (2016)	SG3_26	Fennoscandia	Kola superdeep well	Igneous_volcanic	Core	Y	2849	14	11.3	0.51	136		4.87		483	1.03	0.004	3.52	0.07	1.06	2.09	0.84	10.7		41.4	15.2	68.5		132	27.6	8059	0.3	15.5	37.4
SG3_43_36.1	Vetrin et al. (2016)	SG3_43	Fennoscandia	Kola superdeep well	Igneous_volcanic	Core	Y	2858	8	119	11	469		5.35	110	770	3.28	0.105	4.14	0.07	0.57	1.24	0.26	10.2		59.7	22.8	111		230	44.5	12332	2.31	51.9	837
SG3_43_37.1	Vetrin et al. (2016)	SG3_43	Fennoscandia	Kola superdeep well	Igneous_volcanic	Core	Y	2839	15	35.6	4.42	95.1		2.29	13.6	257	0.88	0.032	4	0.02	0.47	0.98	0.44	5.01		20	7.73	38		88.3	19	9366	0.34	25.4	77.3
SG3_43_38.1	Vetrin et al. (2016)	SG3_43	Fennoscandia	Kola superdeep well	Igneous_volcanic	Core	Y	2844	10	63.1	3.09	83.3		3.04	41	275	1.07	0.01	3.9	0.03	0.42	0.81	0.26	5.2		21.6	8.26	39.4		87.5	18.7	11389	0.76	24.7	225
SG3_43_39.1	Vetrin et al. (2016)	SG3_43	Fennoscandia	Kola superdeep well	Igneous_volcanic	Core	Y	2857	22	58.1	4.71	272		3.84	45.3	1749	4.42	0.02	15.7	0.12	1.9	3.96	1.46	28.8		133	50.9	234		449	88.3	9189	1	159	318
SG3_43_40.1	Vetrin et al. (2016)	SG3_43	Fennoscandia	Kola superdeep well	Igneous_volcanic	Core	Y	2852	15	67.5	1.72	115		3.4	40.3	399	1.48	0.012	4.29	0.02	0.55	1.24	0.29	7.74		33.3	12.2	56.3		114	22.9	10406	0.93	39.1	185
SG3_43_41.1	Vetrin et al. (2016)	SG3_43	Fennoscandia	Kola superdeep well	Igneous_volcanic	Core	Y	2846	4	99.2	10.1	59.9		2.21	75	302	1.72	0.021	1.72	0.01	0.07	0.36	0.11	3.52		20.6	8.86	44.5		106	22.8	11312	1.4	14.1	307
RSES53-3.4	Bell & Harrison (2013)	RSES53	Yilgarn	Jack Hills	Detrital	N/A	Y	3839	9.798			286.37		2.47279	75.9824	520.815		0.031834	2.73856	0.00989754	0.166372	0.78499	0.108176	6.33454	3.30517	39.2906	16.7289	79.2825	16.7716	164.052	35.5752	12204.6		67.7054	267.208
RSES53-3.4b	Bell & Harrison (2013)	RSES53	Yilgarn	Jack Hills	Detrital	N/A	Y	3839	9.798			223.921		2.3289	91.223	587.892		0.0412783	3.34254	0.0215494	0.215605	0.981575	0.181267	8.22377	3.85711	45.7805	19.8746	84.2804	18.777	167.239	37.9876	11812.1		78.6619	296.27
RSES53-15.5	Bell & Harrison (2013)	RSES53	Yilgarn	Jack Hills	Detrital	N/A	Y	3911.98	9.77023			228.399		2.67353	86.151	350.7		0.0289921	3.34012	0.0351419	0.433523	1.06602	0.140566	4.97001	2.17669	23.5458	10.9535	54.091	13.9853	138.689	38.4503	10273.8		108.61	483.433
RSES53-16.11	Bell & Harrison (2013)	RSES53	Yilgarn	Jack Hills	Detrital	N/A	Y	3911.39	9.42224			263.356		4.28594	130.133	423.029		0.106654	6.78696	0.180776	0.886517	1.18829	0.133979	6.41577	2.80384	35.615	14.4867	61.3462	13.8556	126.726	28.5141	13844.9		138.585	382.524
RSES54-14.6a	Bell & Harrison (2013)	RSES54	Yilgarn	Jack Hills	Detrital	N/A	N	3913.69	15.6276			3206.71		359.067	2395.2	3689.51		15.0372	324.951	23.5508	134.409	79.0266	14.5214	156.342	51.8052	450.143	131.795	486.295	100.72	846.272	159.182	9491.79		3423.93	1336.32
RSES54-14.6b	Bell & Harrison (2013)	RSES54	Yilgarn	Jack Hills	Detrital	N/A	N	3913.69	15.6276			4495.7		380.473	1453.54	1957.48		18.7671	333.901	30.0195	157.879	86.7832	15.7321	139.243	42.6014	321.276	75.1946	240.797	44.9594	399.002	66.707	9679.13		1616.28	935.852
RSES54-15.11a	Bell & Harrison (2013)	RSES54	Yilgarn	Jack Hills	Detrital	N/A	N	3897	7.444			285.689		5.97882	96.4345	531.706		0.0379184	7.75796	0.0616555	0.883684	1.67778	0.191178	8.39321	3.34356	39.6132	17.1898	78.1236	16.2591	156.177	34.8784	10931.3		81.2637	224.11
RSES54-15.11b	Bell & Harrison (2013)	RSES54	Yilgarn	Jack Hills	Detrital	N/A	N	3897	7.444			295.945		4.86161	100.46	590.955		0.0424584	7.42284	0.0373328	0.631231	1.41773	0.186622	9.81973	3.90385	47.1595	18.649	83.8	18.778	157.764	36.4252	10870.1		84.3644	238.846
RSES54-18.11	Bell & Harrison (2013)	RSES54	Yilgarn	Jack Hills	Detrital	N/A	Y	3905.88	15.9983			227.201		3.4776	112.404	419.043		0.0523234	7.89698	0.0497335	0.358679	0.747294	0.0511141	5.54284	2.4253	30.9588	14.0746	70.4312	16.1652	144.243	32.9599	12590		34.1514	159.548
RSES54-19.5	Bell & Harrison (2013)	RSES54	Yilgarn	Jack Hills	Detrital	N/A	Y	3869.22	15.0082			253.514		3.5753	129.537	1499.44		0.0553841	13.3624	0.354299	5.77032	8.47451	1.21812	36.5529	13.0997	140.173	51.5588	213.9	42.2338	343.717	74.8207	9361.74		138.707	192.949
RSES55-11.3	Bell & Harrison (2013)	RSES55	Yilgarn	Jack Hills	Detrital	N/A	Y	3841	11.298			303.876		4.02091	145.192	654.401		0.290471	11.9964	0.365721	2.61382	2.17253	0.273297	9.27254	3.9754	47.6233	20.6821	97.0108	21.7025	198.512	44.3503	12349.2		74.4945	117.77
RSES55-13.8	Bell & Harrison (2013)	RSES55	Yilgarn	Jack Hills	Detrital	N/A	N	3885.16	13.0593			150.854		0.563464	65.8764	251.998		0.0183927	1.44148	0.00659715	0.0559679	0.277717	0.068839	2.70749	1.38012	19.3216	9.19405	44.5763	11.79	115.475	28.5892	14462.4		33.8502	225.996
RSES55-15.11	Bell & Harrison (2013)	RSES55	Yilgarn	Jack Hills	Detrital	N/A	N	3894.23	30.5359			326.225		3.15844	118.192	931.037		0.0393972	7.11587	0.127738	2.15221	3.37215	0.498748	17.6976	6.89792	77.9053	31.0083	140.012	30.2148	267.339	57.6157	8687.15		61.7962	93.932
RSES55-15.13	Bell & Harrison (2013)	RSES55	Yilgarn	Jack Hills	Detrital	N/A	Y	3865.64	29.0714			346.285		3.30666	80.978	756.067		0.00932356	6.50375	0.0241372	0.583014	1.33796	0.185459	9.40108	4.58883	61.0826	26.5922	123.051	27.2425	234.394	54.6327	10192		37.2034	58.1555
RSES55-3.13	Bell & Harrison (2013)	RSES55	Yilgarn	Jack Hills	Detrital	N/A	Y	3862	9.956			267.693		1.31616	37.9128	1350.28		0	5.12172	0.0448336	0.921108	3.16743	0.410322	25.0088	10.6692	124.718	48.6662	200.385	41.9414	323.174	70.9013	13496.1		207.204	480.85
RSES55-3.7	Bell & Harrison (2013)	RSES55	Yilgarn	Jack Hills	Detrital	N/A	Y	4005.72	20.0297			283.082		5.13371	99.6419	676.36		0.0519034	11.4216	0.0818569	1.01641	2.18753	0.493579	12.5845	4.52337	54.5117	22.1204	99.0757	21.8714	199.01	45.4548	9730.46		76.1417	103.113
RSES55-4.9	Bell & Harrison (2013)	RSES55	Yilgarn	Jack Hills	Detrital	N/A	Y	4132.61	10.3797			342.921		2.84228	102.172	827.849		0.0128195	14.7014	0.0354505	0.545458	0.991188	0.087491	11.7562	5.12522	61.2356	27.3191	124.065	26.9586	231.375	52.3374	13767.8		132.498	174.665
RSES55-5.13	Bell & Harrison (2013)	RSES55	Yilgarn	Jack Hills	Detrital	N/A	Y	3816	9.408			337.836		3.31533	37.0883	482.188		0	15.3873	0.118805	1.71612	1.91978	0.0378599	8.65335	3.18596	42.2686	16.7677	84.7448	18.4372	161.469	40.0098	11636.3		75.0221	115.645
RSES56-01.18	Bell & Harrison (2013)	RSES56	Yilgarn	Jack Hills	Detrital	N/A	Y	3843	8.32			200.285		1.07474	103.009	491.165		0.04291	2.43899	0.0268893	0.480123	0.764723	0.0865086	5.81994	2.75557	37.1895	16.9243	74.3651	17.61	162.732	37.6001	12667.6		46.0734	246.498
RSES56-02.09	Bell & Harrison (2013)	RSES56	Yilgarn	Jack Hills	Detrital	N/A	N	3890	9.332			116.148		1.63432	96.2215	303.479		0.0405111	1.8823	0.015836	0.207865	0.42053	0.0772253	3.52055	1.76083	21.4392	9.57711	44.3772	10.5951	91.5741	22.048	12330.2		40.23	208.774
RSES56-03.17	Bell & Harrison (2013)	RSES56	Yilgarn	Jack Hills	Detrital	N/A	Y	3889	21.46			238.641		2.19389	86.641	732.052		0.0594646	12.5649	0.12395	1.70521	2.66302	0.250526	12.6502	5.06775	61.3333	25.6408	109.754	23.6273	212.923	47.81	9536.05		28.8521	49.7716
RSES56-10.17	Bell & Harrison (2013)	RSES56	Yilgarn	Jack Hills	Detrital	N/A	Y	3870	9.696			176.939		1.3791	97.9367	745.629		0.0617554	3.40925	0.0276951	0.276727	1.56525	0.218096	11.4438	4.71043	58.7	23.6724	107.457	23.7931	206.269	44.6723	11600.2		81.6117	276.057
RSES58-13.14	Bell & Harrison (2013)	RSES58	Yilgarn	Jack Hills	Detrital	N/A	Y	3892	14.634			193.235		1.8238	100.779	727.814		0.04586	3.23581	0.0239613	0.426741	1.97801	0.264512	14.1791	5.75573	64.8443	23.3482	98.0249	19.4839	164.935	35.1455	11694.4		113.47	346.818
RSES58-15.13	Bell & Harrison (2013)	RSES58	Yilgarn	Jack Hills	Detrital	N/A	Y	3893	8.412			209.49		1.80426	105.189	782.65		0.0484642	3.33163	0.0246025	0.637797	1.92397	0.288227	13.5435	5.85302	64.7346	25.9097	104.917	21.8679	182.285	40.0989	11788.6		120.943	370.415
RSES58-16.15	Bell & Harrison (2013)	RSES58	Yilgarn	Jack Hills	Detrital	N/A	N	3816.44	45.0523			266.548		4.749	109.208	782.572		0.0311857	9.9779	0.0453532	1.18495	1.97193	0.27262	12.509	5.26269	62.8694	26.3114	113.664	26.0467	228.124	52.9666	10784		58.6874	139.193
RSES58-17.7	Bell & Harrison (2013)	RSES58	Yilgarn	Jack Hills	Detrital	N/A	Y	3910.03	11.9454			204.016		1.01903	84.9582	875.889		0.0451172	2.80416	0.0132705	0.126031	1.37759	0.0735451	10.6974	4.70265	63.8502	28.3493	135.521	32.2338	302.823	73.7122	12853.3		88.3579	447.165
RSES58-19.12	Bell & Harrison (2013)	RSES58	Yilgarn	Jack Hills	Detrital	N/A	Y	4058.89	39.1174			196.345		2.93467	85.7835	698.469		0.0535862	6.54561	0.0667029	0.630935	2.05638	0.547874	12.136	5.11983	59.1389	24.7488	105.361	22.7489	187.364	42.8336	8837.53		30.9029	50.7031
RSES58-3.13	Bell & Harrison (2013)	RSES58	Yilgarn	Jack Hills	Detrital	N/A	Y	3902.2	16.3937			326.203		5.28267	95.668	1106.52		0.0372794	20.8937	0.130353	2.51331	4.09159	0.578019	20.5582	7.90076	94.1724	38.3903	168.831	36.7417	320.677	71.5811	9546.81		103.339	238.144
RSES58-4.16	Bell & Harrison (2013)	RSES58	Yilgarn	Jack Hills	Detrital	N/A	Y	4119.23	11.2458			258.865		6.57452	89.3983	861.116		0.0432869	4.88813	0.0597302	1.26341	2.23333	0.425479	14.5014	5.64089	71.45	29.7634	133.74	30.6751	274.707	63.7305	9289.77		36.8174	95.8549
RSES58-5.11	Bell & Harrison (2013)	RSES58	Yilgarn	Jack Hills	Detrital	N/A	Y	3871	7.032			180.09		1.13396	119.376	447.248		0.0537051	3.39712	0.0147991	0.245208	0.903887	0.110264	6.2903	2.88783	36.992	14.3966	64.9334	15.0009	130.952	30.3709	11788.6		93.0458	366.689
RSES58-5.14	Bell & Harrison (2013)	RSES58	Yilgarn	Jack Hills	Detrital	N/A	N	4074.19	12.064			280.896		14.8628	175.316	688.054		0.134857	17.4647	0.246002	1.85123	2.788	0.401734	12.2811	5.03422	58.3708	23.9516	106.046	22.9638	204.338	45.9206	9865.7		153.587	145.092
RSES58-6.12	Bell & Harrison (2013)	RSES58	Yilgarn	Jack Hills	Detrital	N/A	Y	4057.06	16.2852			288.028		5.7059	107.076	529.186		0.344923	7.54983	0.480618	2.85744	2.22729	0.238162	8.45959	3.2169	42.0994	16.8804	77.9523	17.6665	166.165	38.4241	10791.8		62.5081	287.7
RSES59-04.08	Bell & Harrison (2013)	RSES59	Yilgarn	Jack Hills	Detrital	N/A	Y	3838	15.526			624.904		15.5379	126.874	1541.18		0.0727017	7.80573	0.109418	1.3589	2.62586	0.184104	17.8571	9.2892	120.253	51.5402	237.847	52.2528	449.852	100.714	11474.7		122.713	265.035
RSES59-08.13	Bell & Harrison (2013)	RSES59	Yilgarn	Jack Hills	Detrital	N/A	N	3846	11.492			967.739		18.4462	620.787	1637.46		1.81465	31.6467	2.18843	13.8375	10.9207	1.8725	34.122	12.8925	143.413	54.863	238.552	54.1808	476.784	102.334	10966.9		663.673	891.691
RSES59-10.08 (near age spot)	Bell & Harrison (2013)	RSES59	Yilgarn	Jack Hills	Detrital	N/A	N	3859	5.418			226.291		1.86379	126.044	1382.19		0.0390825	4.80074	0.0598944	1.21399	4.36633	0.635779	28.6163	11.05	124.25	45.4354	189.431	38.3002	304.909	66.2682	11769.8		153.867	391.901
RSES59-10.08 (near MC Ti spot)	Bell & Harrison (2013)	RSES59	Yilgarn	Jack Hills	Detrital	N/A	N	3859	5.418			454.269		14.0821	214.13	747.568		0.571534	25.1979	0.791083	4.95196	4.31416	0.557498	14.3072	5.57999	63.9929	25.013	107.199	23.3561	198.478	44.5474	11864.6		306.003	426.791
RSES59-14.12	Bell & Harrison (2013)	RSES59	Yilgarn	Jack Hills	Detrital	N/A	Y	3910.42	11.4526			192.364		0.637147	98.3288	775.76		0.0139395	2.7143	0.00926236	0.30298	0.980899	0.0886369	9.71034	4.42488	55.8473	26.4556	122.249	28.741	262.21	65.0882	13279.8		74.6726	375.383
RSES59-14.14	Bell & Harrison (2013)	RSES59	Yilgarn	Jack Hills	Detrital	N/A	N	3845.51	11.8727			644.394		35.1675	466.774	1367.53		2.28976	51.5086	3.01342	16.8606	10.6129	1.68963	30.7267	11.4869	124.422	47.8591	201.572	43.4579	378.518	82.3837	10689.8		546.981	397.428
RSES59-16.01	Bell & Harrison (2013)	RSES59	Yilgarn	Jack Hills	Detrital	N/A	N	3860	14.986			256.223		10.3388	131.652	222.874		0.314342	16.9431	0.401282	2.25978	1.69158	0.266944	3.46482	1.52503	17.2205	8.12633	37.5614	10.1765	97.2202	24.0412	13664.4		193.508	371.346
RSES59-16.12	Bell & Harrison (2013)	RSES59	Yilgarn	Jack Hills	Detrital	N/A	Y	3912.46	27.6892			277.662		4.08876	100.387	856.586		0.0344923	11.7329	0.0505033	1.04212	2.29822	0.20938	13.0515	5.36403	68.7394	28.6982	132.003	28.7744	255.354	57.7709	10391.6		33.1504	66.1034
RSES59-17.16	Bell & Harrison (2013)	RSES59	Yilgarn	Jack Hills	Detrital	N/A	Y	3873	26.48			181.293		5.89006	117.073	458.78		0.0478807	6.85245	0.0452074	0.997431	1.87465	0.181936	9.03119	3.37249	38.8627	15.1943	70.5763	15.8733	144.171	32.9954	9559.6		30.0882	58.6206
RSES59-18.19	Bell & Harrison (2013)	RSES59	Yilgarn	Jack Hills	Detrital	N/A	Y	4014.93	41.4761			158.32		2.15481	95.9275	427.983		0.0276089	4.87191	0.0531376	0.679291	0.97617	0.208975	6.60556	2.81527	33.6949	14.913	67.5936	15.3062	142.27	32.7276	11247.1		20.3678	61.5702
[truncated: 192 more rows]

## Sheet: G49232
Laurent, O., et al., 2022, Early Earth zircons formed in residual granitic melts produced by tonalite differentiation: Geology, https://doi.org/10.1130/G49232.1
